# Supplementary material
Source: PubMed Central journal article supplement (PMC3616083)
Supplement: tran-3-130-s01.pdf [file tran-3-130-s01.pdf]

Supplementary Material to:

Yi Qing He, Elissa L. Sutcliffe, Karen L. Bunting, Jasmine Li, Katharine J. Goodall, Ivan K.A. Poon, et al. The endoglycosidase heparanase enters the nucleus of T lymphocytes and modulates H3 methylation at actively transcribed genes via the interplay with key chromatin modifying enzymes. *Transcription* 2012; 3(3); <http://dx.doi.org/10.4161/trns.19998>;  
<http://www.landesbioscience.com/journals/transcription/article/19998/>

## Figure S1

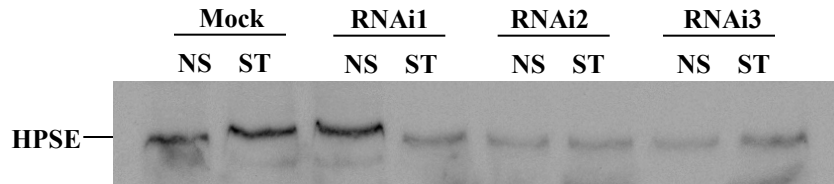

### **Figure S1. Heparanase Protein Production is Prevented by Heparanase siRNA Transfection**

Jurkat T cells were transfected with a single heparanase siRNA (RNai1, RNai2, and RNai3) or a negative control siRNA (Mock) (Ambion) at a concentration of 50 nM using Lipofectamine 2000 reagent (Invitrogen) for 2 days and subsequently left untreated (NS) or stimulated with PI for 2 hr (ST). Whole cell protein extracts were made and Western blotting analysis was used to detect heparanase protein in the cells. Minimal heparanase protein could be detected in resting or activated Jurkat cells that had been transfected with the heparanase siRNAs.

**Figure S2**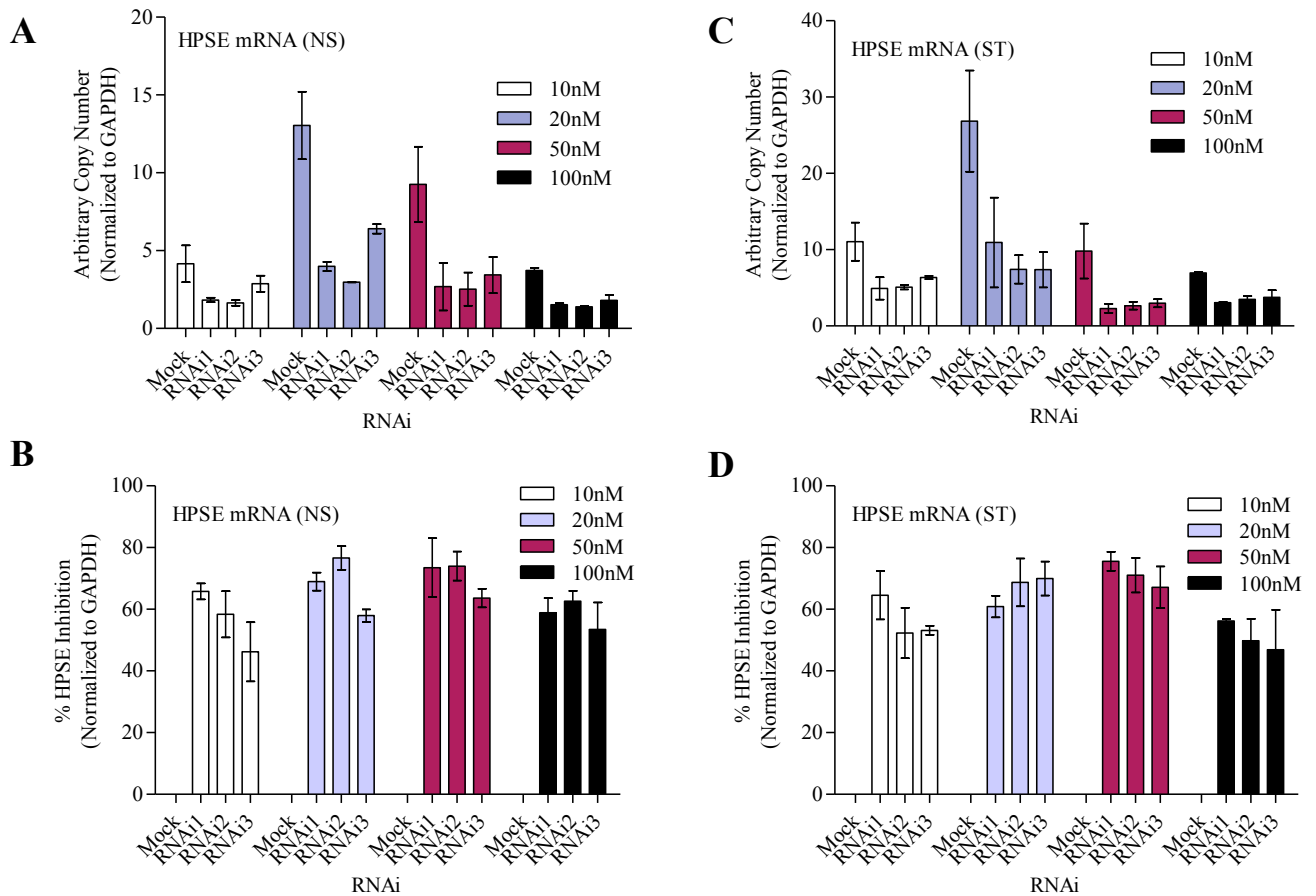**Figure S2. Heparanase mRNA Production is Reduced by Heparanase siRNA transfection**

Jurkat T cells were transfected with a single heparanase siRNA (RNAi1, RNAi2 or RNAi3) or a combination of the three siRNAs or mock siRNA at different concentrations (10 nM, 20 nM, 30 nM, 50 nM and 100 nM) using Lipofectamine 2000 reagent for 2 days and subsequently left untreated (NS) or stimulated with PI for 2 hr (ST). Total RNA was extracted and Taqman real Time PCR analysis was used to detect the efficiency of heparanase mRNA knockdown by heparanase siRNA transfection. Heparanase cDNA levels were significantly reduced in both resting (A, B) and activated (C, D) Jurkat cells transfected with any of the three heparanase siRNAs. The inhibition efficiency ranged from 57% to 80% (B and D). No significant difference was seen between the three heparanase siRNAs. The heparanase siRNAs were generally effective at all concentrations tested but a concentration of 50 nM was chosen for all subsequent experiments. Data represent the mean  $\pm$  SE of three independent experiments.

**Figure S3**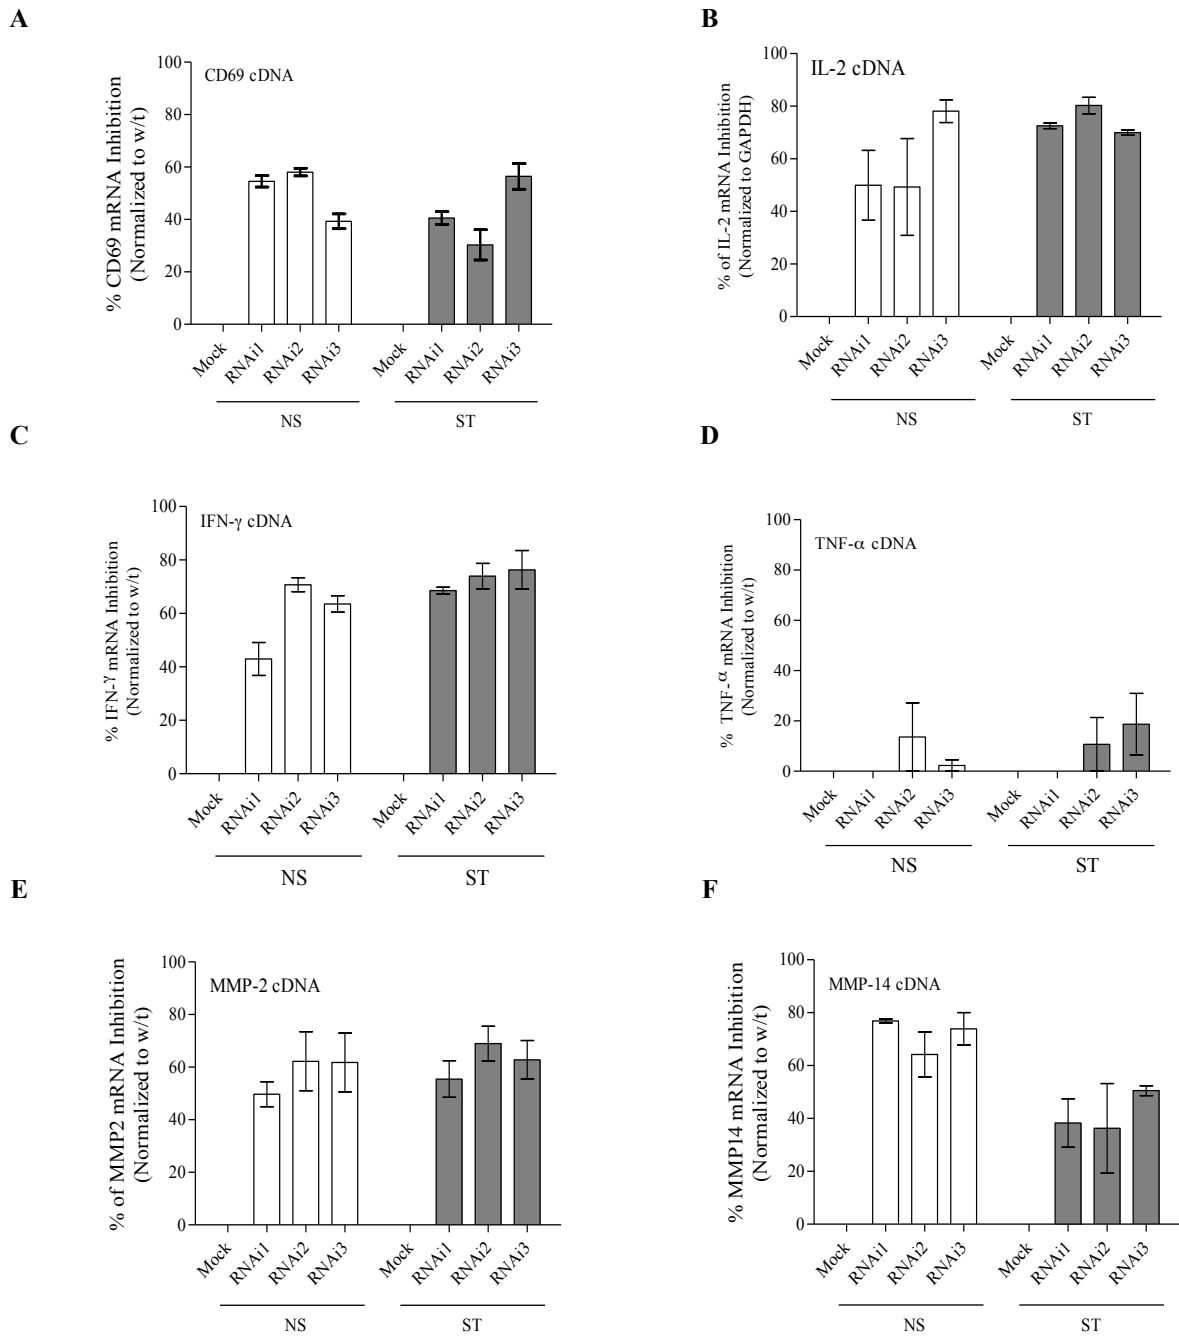**Figure S3 Heparanase is Essential for Inducible Gene Transcription in T cells**

Jurkat T cells were transfected with validated heparanase siRNAs (RNAi1, RNAi2 and RNAi3) or a negative control siRNA (Mock) using Lipofectamine 2000 reagent (Invitrogen). At 48 hr post-transfection, Jurkat T cells were either left untreated (NS) or stimulated with PI for 2 hr (ST). Total RNA was extracted and TaqMan real-time PCR performed for CD69 (A), IL-2 (B), IFN- $\gamma$  (C), TNF- $\alpha$  (D), MMP-2 (E) and MMP-14 (F). The arbitrary copies were normalised to GAPDH and results plotted as percentage inhibition. Data represent the mean  $\pm$  SE of three independent experiments.

**Figure S4**

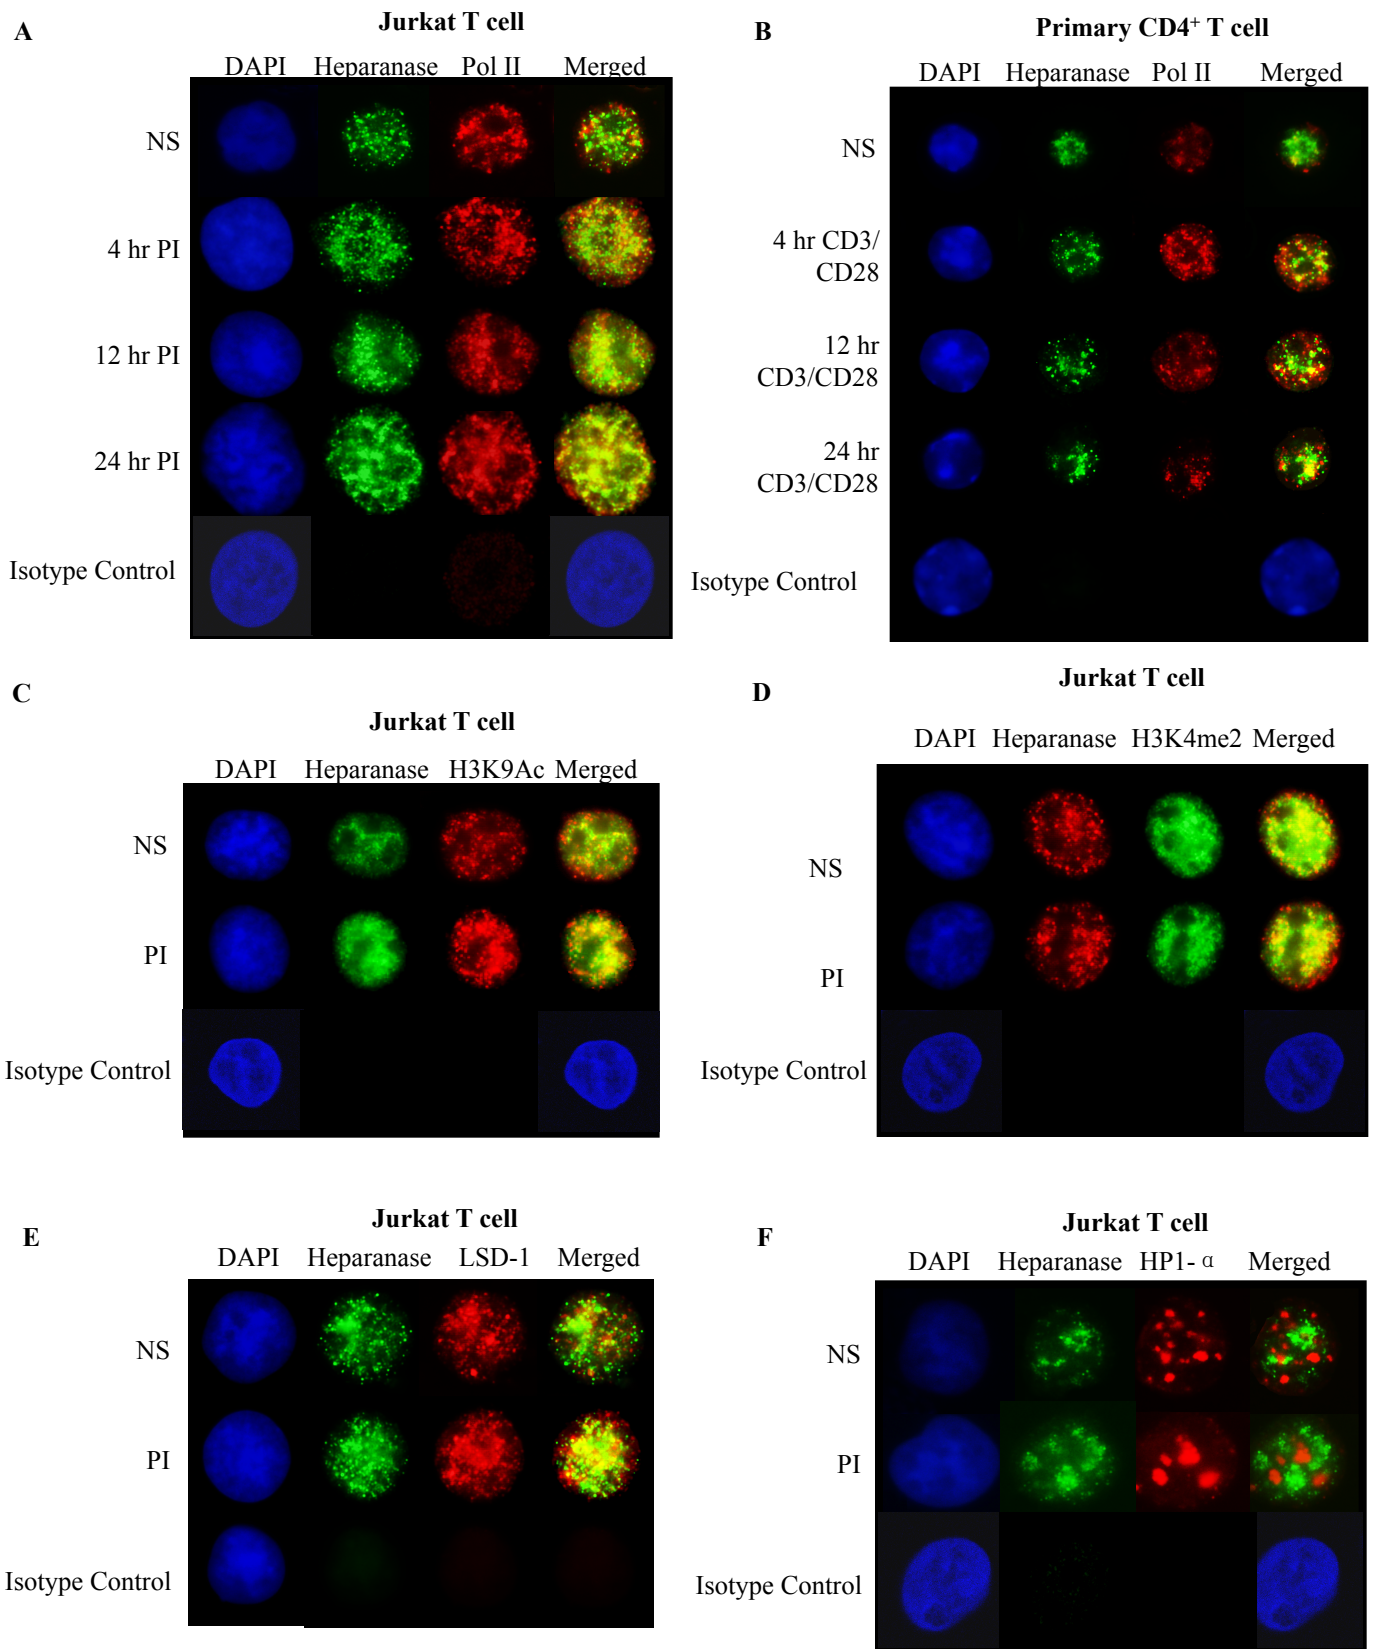

**Figure S4. Nuclear Heparanase Associates with Discrete Chromatin Regions**

(A) Fluorescence microscopy of fixed nuclei from Jurkat T cells (NS or PI-stimulated for the indicated time points) stained with DAPI and rabbit anti-heparanase or mouse anti-Pol II antibodies. A rabbit isotype of equivalent concentration was used as a control and showed no fluorescence.

(B) Fluorescence microscopy was performed as above using purified mouse primary CD4<sup>+</sup> T cells that were NS or stimulated with anti-CD3 and anti-CD28 antibodies for the indicated time points.

(C-F) Fluorescence microscopy was performed as in A, using rabbit polyclonal antibodies against H3K9ac (C) and H3K4me2 (D) and mouse monoclonal antibodies against LSD1 (E) and HP-1 $\alpha$  (F).

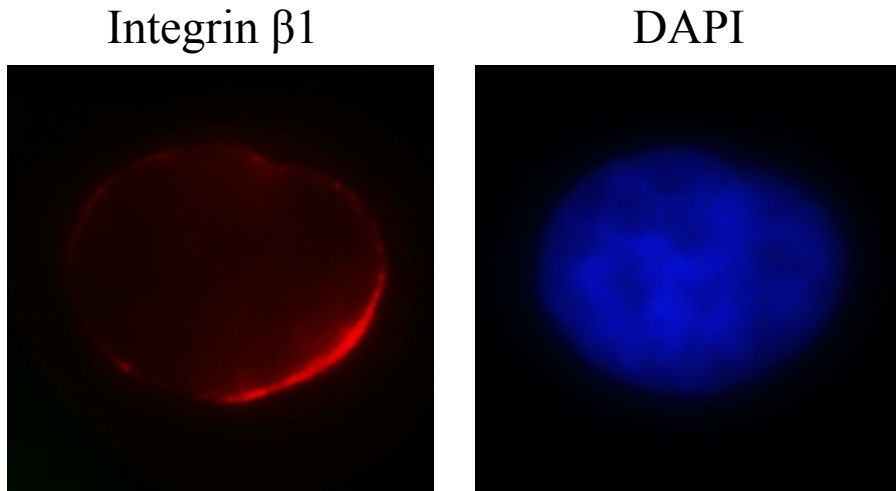

**Figure S5. Fluorescence microscopy on fixed whole cells and nuclei**  
Whole cells and nuclei from Jurkat T cells were stained with the monoclonal mouse anti-human integrin  $\beta 1$  (Abcam, ab8238) followed by Cy3-conjugated donkey anti-mouse (Jackson ImmunoResearch, 715-165-151) and DAPI.

**Figure S6**

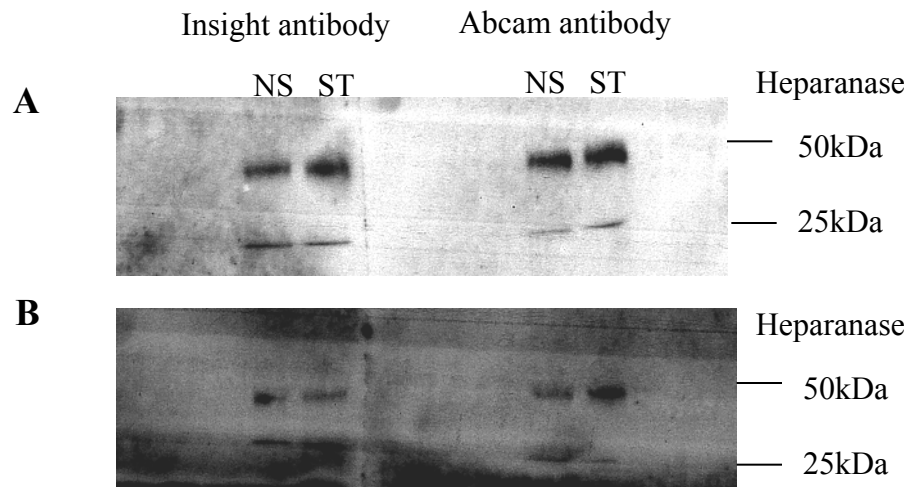

**Figure S6. Nuclear Heparanase detected with two different antibodies**

(A) Immunoblot analysis of heparanase protein levels in nuclear extracts prepared from non-stimulated (NS) and stimulated (ST) Jurkat T cells. Western blotting analysis was used to detect heparanase protein using a rabbit polyclonal heparanase antibody either from Insight (Insight, Ins-AB-04002) or Abcam (Ab85543) .

(B) Repeat experiment is shown.



**Figure S7**

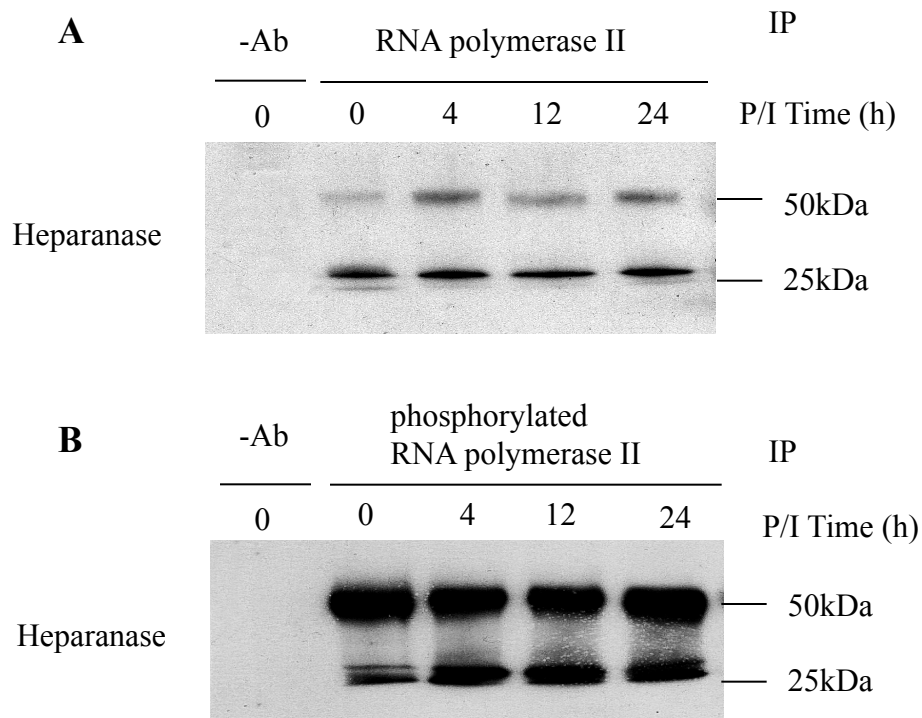

**Figure S7. Nuclear Heparanase Associates with RNA polymerase II**

Immunoprecipitation of (A) RNA polymerase II or (B) RNA polymerase II phosphorylated from cross-linked sonicated nuclear lysates of either resting (0) or PI-treated T cells for the times indicated followed by immunoblot analysis for heparanase. No antibody (-Ab) was used as a negative control.

Figure S8

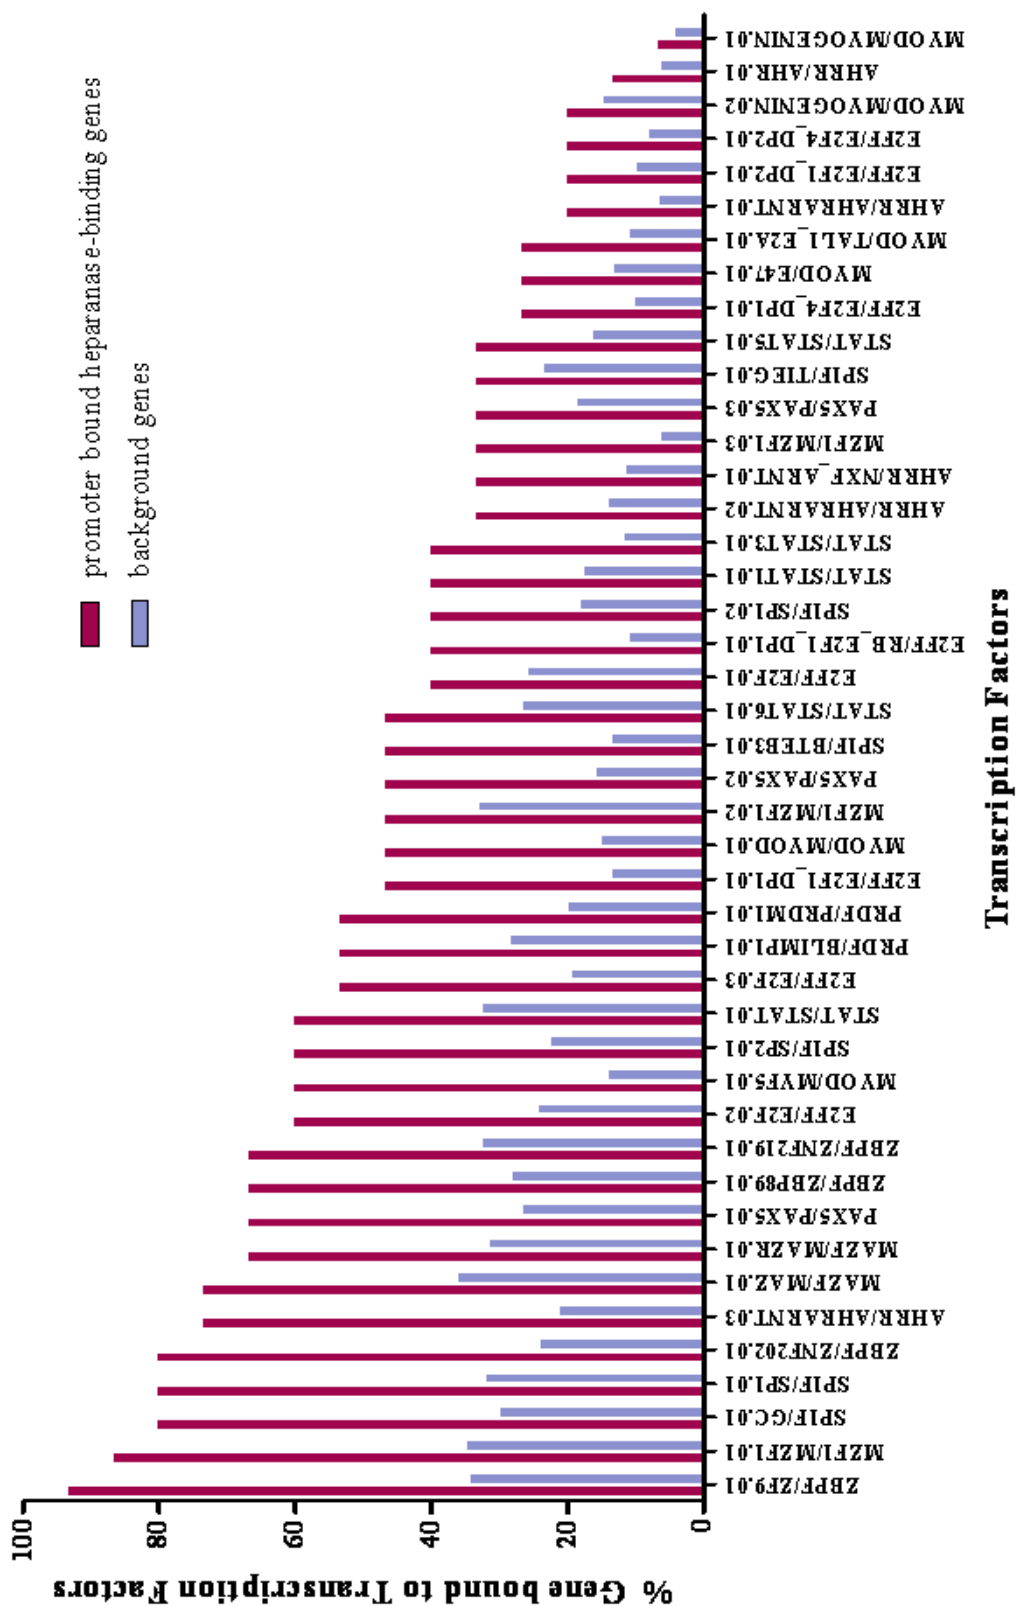

Figure S8 Genomatix analysis showing transcription factor binding sites on heparanase target genes  
Bar graph of the most significant transcription factor modules predicted to bind heparanase within promoter regions of heparanase-bound genes identified by ChIP-on-Chip.

## Figure S9

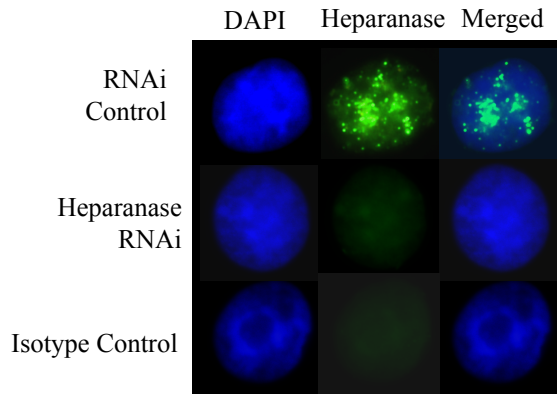

### Figure S9. Nuclear localisation of heparanase in Jurkat T cells

(A) Fluorescence microscopy of fixed Jurkat T cells transfected with heparanase siRNA or a negative control siRNA (Ambion) at a concentration of 50 nM using Lipofectamine 2000 reagent (Invitrogen) for 2 days and subsequently stained with DAPI and rabbit polyclonal anti-heparanase. A rabbit isotype of equivalent concentration was used as a control to show no non-specific fluorescence.

Figure S10

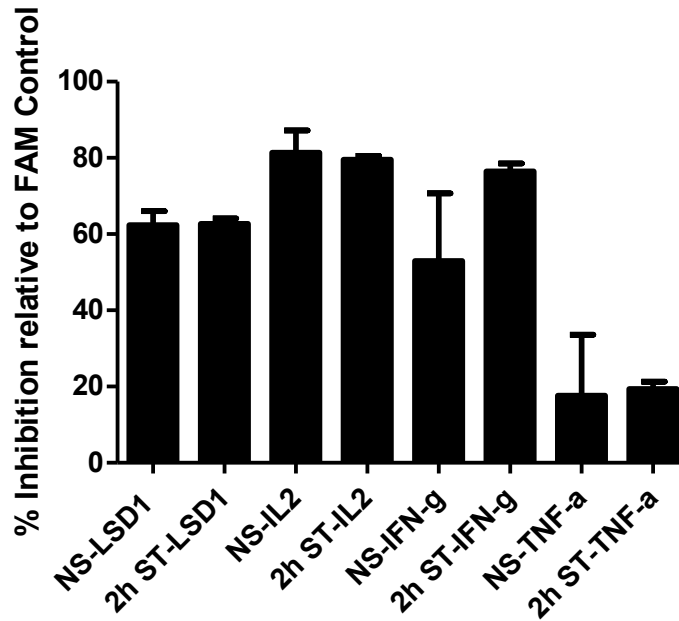

**Figure S10. LSD1 is Essential for Inducible Gene Transcription in T cells**

Jurkat T cells were transfected with 30 nM LSD1 siRNA (sc-60970) or a negative control siRNA (Mock). At 48 hr post-transfection, Jurkat T cells were either left untreated (NS) or stimulated with PI for 2 hr (ST). Total RNA was extracted and TaqMan real-time PCR performed for *LSD1*, *IL-2*, *IFN- $\gamma$*  and *TNF- $\alpha$* . Results are plotted as percentage inhibition relative to corresponding FAM control.

Figure S11

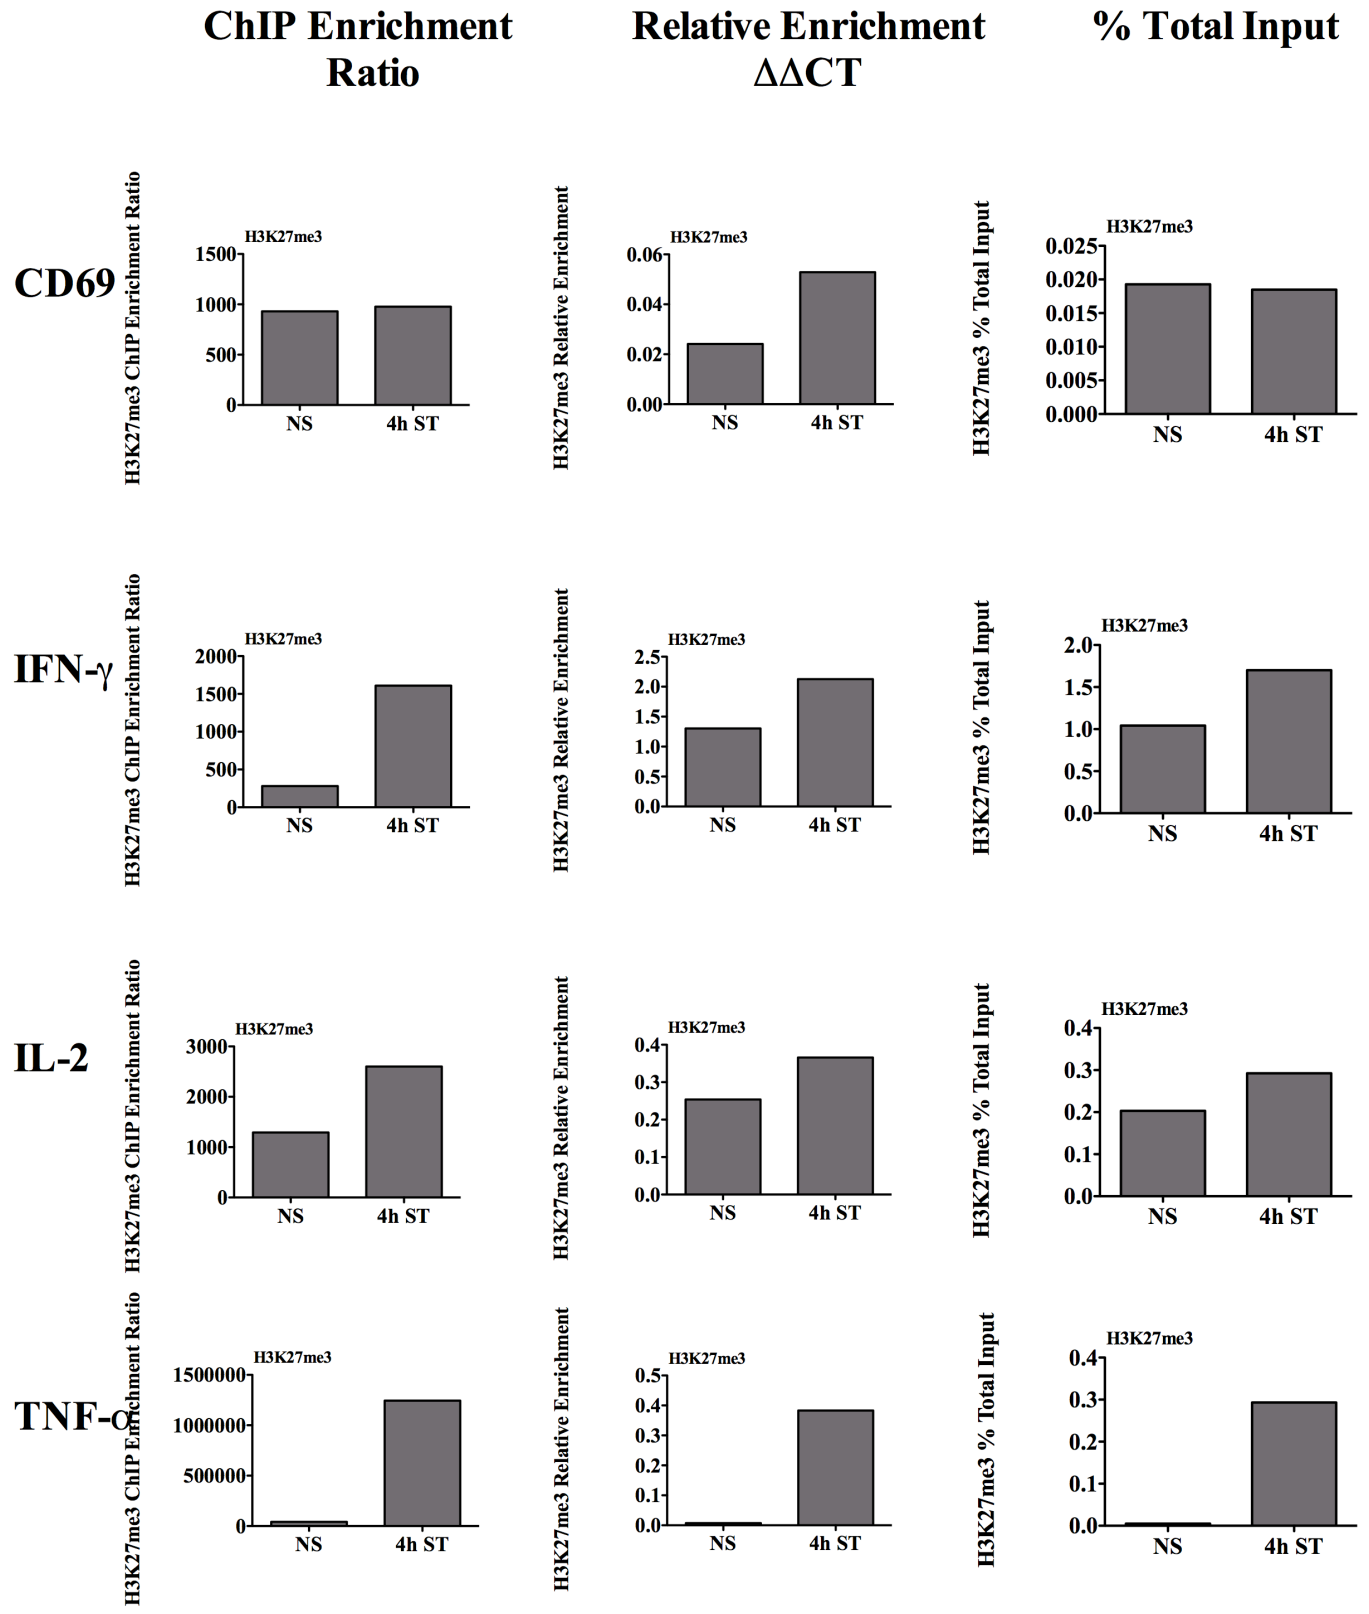

### **Figure S11. ChIP Analysis Comparison For H3K27me3**

ChIP assays were carried out on Jurkat T cells either non-stimulated (NS) or stimulated with PMA/CaI for 4 hours (4h ST). Real-time PCR analysis was performed on immunoprecipitated DNA recovered with the anti-H3K27me3 antibody (Abcam, ab6002) using primers covering the proximal promoter of *CD69*, *IFN-g*, *IL-2* and *TNF-a*. ChIP data were analysed by 3 different methods: 1) For ChIP enrichment ratio, Ct values were converted to arbitrary copies and data graphed as the fold enrichment ratio of immunoprecipitated DNA relative to the no antibody control and normalised against the total input DNA. 2) Relative enrichment was calculated using the  $\Delta\Delta\text{Ct}$  method. 3) Percentage total input involved subtraction of the no antibody control from the H3K27me3 samples and the data graphed by converting this value into a percentage out of the total genomic input DNA for each respective sample.

**Table S1****Table S1 Genes in Resting and Activated Jurkat T cells with Bound Heparanase that also Carry RNA Polymerase II**

Data based on a ChIP-on-chip assay performed on resting (NS) and 12 hr PI activated (ST) Jurkat T cells using heparanase and Pol II specific antibodies.

|               |                     | Binding region | Promoter      |              |              | 5'-transcribed region |              |             | 3'-transcribed region |            |    |
|---------------|---------------------|----------------|---------------|--------------|--------------|-----------------------|--------------|-------------|-----------------------|------------|----|
|               |                     |                | NS            | NS & ST      | ST           | NS                    | NS & ST      | ST          | NS                    | NS & ST    | ST |
| R>2<br>(6182) | heparanase          | 644            | 1387          | 469          | 969          | 1961                  | 691          | 18          | 35                    | 8          |    |
|               | Pol II & heparanase | 344<br>(53%)   | 1087<br>(78%) | 169<br>(36%) | 506<br>(52%) | 1518<br>(77%)         | 228<br>(33%) | 12<br>(67%) | 24<br>(69%)           | 5<br>(63%) |    |
| R>3<br>(3875) | heparanase          | 72             | 1154          | 356          | 100          | 1636                  | 523          | 1           | 27                    | 6          |    |
|               | Pol II & heparanase | 51<br>(71%)    | 928<br>(80%)  | 140<br>(39%) | 60<br>(60%)  | 1297<br>(79%)         | 176<br>(34%) | 1<br>(100%) | 20<br>(74%)           | 3<br>(50%) |    |
| R>5<br>(622)  | heparanase          | 0              | 223           | 59           | 1            | 276                   | 61           | 0           | 2                     | 0          |    |
|               | Pol II & heparanase | 0<br>(N/A)     | 186<br>(83%)  | 21<br>(36%)  | 1<br>(100%)  | 229<br>(83%)          | 18<br>(30%)  | 0<br>(N/A)  | 1<br>(50%)            | 0<br>(N/A) |    |

(Values in brackets represent % of genes with bound heparanase that also carry bound Pol II)

N/A = not applicable

**Table S2** ChIP-on-chip raw data showing the list of genes for each subgroup used to generate the Venn diagrams depicted in Figure 4A



**HPSE- bound genes (promoter region)****NS subset (72 genes)**

| Gene         | Rank (Hep-N | Chromosome | Start     | End       | Min P(Xbar) | Probe       | P(Xbar)    |
|--------------|-------------|------------|-----------|-----------|-------------|-------------|------------|
| BCL9         | 26          | chr1       | 145474528 | 145482321 | 0.0083724   | chr1:145478 | 0.0083724  |
| RIOK2        | 80          | chr5       | 96542285  | 96549740  | 0.01063179  | chr5:096545 | 0.01063179 |
| SLC12A3      | 100         | chr16      | 55450071  | 55458963  | 0.01101466  | chr16:05545 | 0.01101466 |
| CST11        | 122         | chr20      | 23379225  | 23386897  | 0.01155636  | chr20:02338 | 0.01155636 |
| HIST1H4D     | 328         | chr6       | 26295209  | 26305006  | 0.01527961  | chr6:026297 | 0.01527961 |
| TNP2         | 396         | chr16      | 11268464  | 11274594  | 0.01615194  | chr16:01127 | 0.01615194 |
| hsa-mir-365- | 400         | chr16      | 14305449  | 14312737  | 0.01618193  | chr16:01430 | 0.01618193 |
| TGM5         | 404         | chr15      | 41344383  | 41350712  | 0.01619097  | chr15:04135 | 0.01619097 |
| COPA         | 483         | chr1       | 158580130 | 158585586 | 0.01702716  | chr1:158585 | 0.01702716 |
| BTBD16       | 527         | chr10      | 124015825 | 124022272 | 0.01742544  | chr10:12401 | 0.01742544 |
| HPX          | 625         | chr11      | 6416244   | 6423836   | 0.0184473   | chr11:00642 | 0.0184473  |
| CRADD        | 678         | chr12      | 92590704  | 92598143  | 0.01894699  | chr12:09259 | 0.01894699 |
| RSU1         | 737         | chr10      | 16896591  | 16902586  | 0.01938508  | chr10:01689 | 0.01938508 |
| hsa-mir-142  | 859         | chr17      | 53763604  | 53769081  | 0.02036659  | chr17:05376 | 0.02036659 |
| IFNE1        | 874         | chr9       | 21469499  | 21473246  | 0.02050666  | chr9:021472 | 0.02050666 |
| IRF3         | 918         | chr19      | 54860238  | 54868994  | 0.02088004  | chr19:05486 | 0.02088004 |
| BPGM         | 1003        | chr7       | 133976677 | 133984607 | 0.02145829  | chr7:133981 | 0.02145829 |
| USPL1        | 1016        | chr13      | 30084472  | 30092320  | 0.02153029  | chr13:03008 | 0.02153029 |
| SLC9A3R2     | 1118        | chr16      | 2011849   | 2019360   | 0.02223858  | chr16:00201 | 0.02223858 |
| MYADM        | 1152        | chr19      | 59059318  | 59066799  | 0.02247581  | chr19:05906 | 0.02247581 |
| MRPL11       | 1179        | chr11      | 65960354  | 65963752  | 0.02261877  | chr11:06596 | 0.02261877 |
| C22orf36-GC  | 1195        | chr22      | 23319187  | 23327336  | 0.0227134   | chr22:02331 | 0.0227134  |
| SSBP4        | 1265        | chr19      | 18385855  | 18393619  | 0.02313938  | chr19:01838 | 0.02313938 |
| WNT8A        | 1489        | chr5       | 137442071 | 137449093 | 0.02464208  | chr5:137447 | 0.02464208 |
| RNF186       | 1503        | chr1       | 20012002  | 20019348  | 0.02476322  | chr1:020015 | 0.02476322 |
| FGF23        | 1562        | chr12      | 4356663   | 4364489   | 0.02511217  | chr12:00436 | 0.02511217 |
| FLJ35767     | 1593        | chr17      | 77905092  | 77912899  | 0.0253151   | chr17:07790 | 0.0253151  |
| KIAA1737     | 1632        | chr14      | 76629318  | 76636258  | 0.02549416  | chr14:07663 | 0.02549416 |
| C20orf144    | 1687        | chr20      | 31708624  | 31715370  | 0.02584901  | chr20:03170 | 0.02584901 |
| ANKRD2       | 1717        | chr10      | 99321126  | 99333574  | 0.02605302  | chr10:09932 | 0.02605302 |
| PISD         | 1773        | chr22      | 30354478  | 30362290  | 0.02632949  | chr22:03035 | 0.02632949 |
| SLC28A1      | 1803        | chr15      | 83223681  | 83231172  | 0.02651064  | chr15:08322 | 0.02651064 |
| C14orf124    | 1827        | chr14      | 23979222  | 23982176  | 0.02663443  | chr14:02398 | 0.02663443 |
| NHP2L1       | 1924        | chr22      | 40406211  | 40414829  | 0.02717942  | chr22:04041 | 0.02717942 |
| C14orf159    | 2013        | chr14      | 90645088  | 90652318  | 0.02765591  | chr14:09065 | 0.02765591 |
| PRIC285      | 2054        | chr20      | 61667184  | 61675355  | 0.0278935   | chr20:06167 | 0.0278935  |
| RAB11FIP1    | 2141        | chr8       | 37873730  | 37881597  | 0.02835216  | chr8:037880 | 0.02835216 |
| PWWP2        | 2244        | chr10      | 134055349 | 134063105 | 0.02891875  | chr10:13405 | 0.02891875 |
| LCP1         | 2315        | chr13      | 45651978  | 45657698  | 0.02939461  | chr13:04565 | 0.02939461 |
| SEMA4D       | 2340        | chr9       | 91282126  | 91289928  | 0.02951147  | chr9:091285 | 0.02951147 |
| CECR5        | 2429        | chr22      | 16018491  | 16030117  | 0.03007393  | chr22:01602 | 0.03007393 |
| PDCD10-SE    | 2562        | chr3       | 168935525 | 168936167 | 0.03082651  | chr3:168935 | 0.03082651 |
| SYT8         | 2793        | chr11      | 1806120   | 1815337   | 0.03194716  | chr11:00180 | 0.03194716 |
| AIFM1-RAB    | 2857        | chrX       | 129127527 | 129133244 | 0.03239793  | chrX:129132 | 0.03239793 |
| SMEK2        | 2945        | chr2       | 55695588  | 55703882  | 0.03281718  | chr2:055699 | 0.03281718 |
| WDR68        | 2967        | chr17      | 58980753  | 58984037  | 0.03292285  | chr17:05898 | 0.03292285 |
| EPHB3        | 3046        | chr3       | 185757105 | 185764831 | 0.0332505   | chr3:185757 | 0.0332505  |
| KLF16        | 3132        | chr19      | 1803385   | 1819194   | 0.03364423  | chr19:00181 | 0.03364423 |
| LCN12        | 3179        | chr9       | 138961219 | 138968992 | 0.03395174  | chr9:138963 | 0.03395174 |
| HELZ         | 3283        | chr17      | 62669303  | 62675309  | 0.03446858  | chr17:06267 | 0.03446858 |
| LOC51057-N   | 3301        | chr2       | 63669343  | 63669497  | 0.03453812  | chr2:063669 | 0.03453812 |
| C17orf61-NI  | 3426        | chr17      | 7248233   | 7252087   | 0.03515438  | chr17:00725 | 0.03515438 |
| LASS4        | 3524        | chr19      | 8175856   | 8182211   | 0.03570452  | chr19:00817 | 0.03570452 |
| WFIKKN1      | 3589        | chr16      | 619481    | 624135    | 0.03603623  | chr16:00062 | 0.03603623 |
| IFT88        | 3833        | chr13      | 20033365  | 20041219  | 0.03722604  | chr13:02003 | 0.03722604 |

|             |      |       |           |           |            |              |            |
|-------------|------|-------|-----------|-----------|------------|--------------|------------|
| BRPF1       | 3851 | chr3  | 9746715   | 9764698   | 0.03729898 | chr3:0097482 | 0.03729898 |
| GOLGA2      | 3910 | chr9  | 130075982 | 130083058 | 0.03768074 | chr9:1300822 | 0.03768074 |
| TFAM        | 4290 | chr10 | 59809771  | 59817322  | 0.03980244 | chr10:059812 | 0.03980244 |
| ZAK         | 4338 | chr2  | 173643921 | 173651316 | 0.04003086 | chr2:1736482 | 0.04003086 |
| CXorf2-TKT  | 4446 | chrX  | 153176646 | 153177204 | 0.04066329 | chrX:153177  | 0.04066329 |
| NLRC3       | 4668 | chr16 | 3565418   | 3571123   | 0.04186397 | chr16:003562 | 0.04186397 |
| BLR1        | 4686 | chr11 | 118254785 | 118262354 | 0.04196502 | chr11:118252 | 0.04196502 |
| C14orf133-A | 4766 | chr14 | 76993687  | 76994063  | 0.04243067 | chr14:076992 | 0.04243067 |
| ARNTL       | 4886 | chr11 | 13251031  | 13258380  | 0.0431609  | chr11:013252 | 0.0431609  |
| IL27        | 4902 | chr16 | 28424058  | 28431137  | 0.04328856 | chr16:028422 | 0.04328856 |
| hsa-mir-496 | 4936 | chr14 | 100596166 | 100596726 | 0.04353422 | chr14:100592 | 0.04353422 |
| U72         | 4965 | chr8  | 99124472  | 99126855  | 0.04367235 | chr8:0991262 | 0.04367235 |
| FLJ35695    | 4978 | chr15 | 36770728  | 36778629  | 0.04375532 | chr15:036772 | 0.04375532 |
| IFNGR2      | 5012 | chr21 | 33691902  | 33699450  | 0.043939   | chr21:033692 | 0.043939   |
| PRKAB1      | 5088 | chr12 | 118585037 | 118592956 | 0.04439942 | chr12:118592 | 0.04439942 |
| CDC6        | 5154 | chr17 | 35692270  | 35700095  | 0.04473573 | chr17:035692 | 0.04473573 |
| NLGN1       | 5548 | chr3  | 174593547 | 174807580 | 0.04718573 | chr3:1745982 | 0.04718573 |

### HPSE- bound genes (promoter region)

### NS and ST subset (1154 genes)

| Gene        | Rank (Hep-2) | Chromosome | Start     | End       | Min P(Xbar) | Probe       | P(Xbar)   |
|-------------|--------------|------------|-----------|-----------|-------------|-------------|-----------|
| NKX6-3      | 1            | chr8       | 41621848  | 41629546  | 0.010509    | chr8:041622 | 0.010509  |
| NTNG2       | 3            | chr9       | 134026617 | 134034414 | 0.0121243   | chr9:134022 | 0.0121243 |
| CDKN2A      | 4            | chr9       | 21962817  | 21989381  | 0.0129204   | chr9:021962 | 0.0129204 |
| BOC         | 5            | chr3       | 114407646 | 114416477 | 0.0130521   | chr3:114412 | 0.0130521 |
| CHD5        | 6            | chr1       | 6160776   | 6167589   | 0.0135994   | chr1:006162 | 0.0135994 |
| CBLL1       | 7            | chr7       | 107167982 | 107174249 | 0.01388     | chr7:107172 | 0.01388   |
| GPR125      | 9            | chr4       | 22124713  | 22128741  | 0.0141147   | chr4:022122 | 0.0141147 |
| RFWD2       | 16           | chr1       | 174440056 | 174447809 | 0.0148764   | chr1:174442 | 0.0148764 |
| PCDHAC1     | 20           | chr5       | 140281111 | 140289119 | 0.015095    | chr5:140282 | 0.015095  |
| RRAGD       | 23           | chr6       | 90175942  | 90183958  | 0.0153406   | chr6:090172 | 0.0153406 |
| CCDC128     | 26           | chr2       | 48516472  | 48524055  | 0.0155736   | chr2:048522 | 0.0155736 |
| RPL7-RDH    | 28           | chr8       | 74368477  | 74369875  | 0.015742    | chr8:074362 | 0.015742  |
| SHOX2       | 30           | chr3       | 159304262 | 159306480 | 0.0158168   | chr3:159302 | 0.0158168 |
| IQCC        | 33           | chr1       | 32443748  | 32446347  | 0.015944    | chr1:032442 | 0.015944  |
| FOXF2       | 34           | chr6       | 1329705   | 1337620   | 0.0159659   | chr6:001332 | 0.0159659 |
| JARID2      | 35           | chr6       | 15349425  | 15356984  | 0.015966    | chr6:015352 | 0.015966  |
| C9orf58     | 38           | chr9       | 132958448 | 132988208 | 0.0162209   | chr9:132952 | 0.0162209 |
| PRR3        | 39           | chr6       | 30627214  | 30633000  | 0.0162888   | chr6:030632 | 0.0162888 |
| GTF3C4      | 42           | chr9       | 134530509 | 134535548 | 0.0165883   | chr9:134532 | 0.0165883 |
| FNBP1       | 43           | chr9       | 131843296 | 131845665 | 0.0167271   | chr9:131842 | 0.0167271 |
| WDR53       | 49           | chr3       | 197778102 | 197785097 | 0.0171095   | chr3:197782 | 0.0171095 |
| CENTB2      | 55           | chr3       | 196642611 | 196650517 | 0.0174189   | chr3:196642 | 0.0174189 |
| RHPN1       | 59           | chr8       | 144517099 | 144527555 | 0.0174686   | chr8:144522 | 0.0174686 |
| hsa-mir-9-1 | 61           | chr1       | 154656981 | 154665821 | 0.0176183   | chr1:154652 | 0.0176183 |
| FNDC3B      | 67           | chr3       | 173236194 | 173242875 | 0.0179523   | chr3:173242 | 0.0179523 |
| IFNA6       | 70           | chr9       | 21338391  | 21343948  | 0.0180107   | chr9:021342 | 0.0180107 |
| MET         | 74           | chr7       | 116094467 | 116102152 | 0.0180291   | chr7:116092 | 0.0180291 |
| IL17B       | 81           | chr5       | 148736516 | 148744478 | 0.0182832   | chr5:148732 | 0.0182832 |
| AUTS2       | 82           | chr7       | 68696413  | 68705078  | 0.0183194   | chr7:068702 | 0.0183194 |
| ARHGAP26    | 84           | chr5       | 142125627 | 142132970 | 0.0184161   | chr5:142132 | 0.0184161 |
| GNAI2       | 87           | chr3       | 50238692  | 50251219  | 0.0184984   | chr3:050232 | 0.0184984 |
| NR4A3       | 88           | chr9       | 101618597 | 101631350 | 0.0185336   | chr9:101622 | 0.0185336 |
| HES5        | 89           | chr1       | 2450104   | 2456990   | 0.0185461   | chr1:002452 | 0.0185461 |
| WDR55       | 90           | chr5       | 140022201 | 140027097 | 0.0186118   | chr5:140022 | 0.0186118 |
| C7orf20     | 96           | chr7       | 881145    | 885329    | 0.0187747   | chr7:000882 | 0.0187747 |
| GDNF        | 97           | chr5       | 37868206  | 37880609  | 0.0187798   | chr5:037872 | 0.0187798 |
| NSD1        | 100          | chr5       | 176487932 | 176497246 | 0.018834    | chr5:176492 | 0.018834  |

|             |           |           |           |           |             |           |
|-------------|-----------|-----------|-----------|-----------|-------------|-----------|
| KATNB1      | 104 chr16 | 56324907  | 56331110  | 0.0189696 | chr16:05632 | 0.0189696 |
| ADORA3      | 107 chr1  | 111845122 | 111853720 | 0.0190575 | chr1:111852 | 0.0190575 |
| IRX1        | 112 chr5  | 3643785   | 3651652   | 0.019195  | chr5:00364  | 0.019195  |
| hsa-mir-183 | 114 chr7  | 129202017 | 129207605 | 0.0192376 | chr7:12920  | 0.0192376 |
| ACOT7       | 115 chr1  | 6246935   | 6380279   | 0.0192934 | chr1:00637  | 0.0192934 |
| DGKI        | 116 chr7  | 137179622 | 137187315 | 0.0193191 | chr7:13718  | 0.0193191 |
| ZBTB47      | 118 chr3  | 42670358  | 42678207  | 0.0193701 | chr3:04267  | 0.0193701 |
| RAP1GDS1    | 119 chr4  | 99396317  | 99404170  | 0.0193915 | chr4:09940  | 0.0193915 |
| FSTL5       | 122 chr4  | 163302316 | 163310043 | 0.0194305 | chr4:16330  | 0.0194305 |
| ORC4L       | 124 chr2  | 148493118 | 148500493 | 0.0194808 | chr2:14849  | 0.0194808 |
| FAM78A-PF   | 125 chr9  | 133145164 | 133150435 | 0.0195028 | chr9:13314  | 0.0195028 |
| PPP1R16A    | 126 chr8  | 145688366 | 145698305 | 0.0195629 | chr8:14569  | 0.0195629 |
| AK5         | 127 chr1  | 77514860  | 77523188  | 0.0196541 | chr1:07752  | 0.0196541 |
| BRP44-IQW   | 130 chr1  | 166171964 | 166172459 | 0.019791  | chr1:16617  | 0.019791  |
| EN1         | 132 chr2  | 119319871 | 119327626 | 0.0198391 | chr2:11932  | 0.0198391 |
| CDK6        | 133 chr7  | 92298051  | 92306286  | 0.0198914 | chr7:09230  | 0.0198914 |
| TRAF1       | 134 chr9  | 122725888 | 122734325 | 0.0198956 | chr9:12273  | 0.0198956 |
| POU4F2      | 140 chr4  | 147774034 | 147782024 | 0.0201053 | chr4:14777  | 0.0201053 |
| HPCAL4      | 142 chr1  | 39927235  | 39935057  | 0.0201494 | chr1:03993  | 0.0201494 |
| TIGD6       | 143 chr5  | 149358265 | 149365892 | 0.0201552 | chr5:14936  | 0.0201552 |
| CDC20B      | 145 chr5  | 54499874  | 54509345  | 0.0202253 | chr5:05450  | 0.0202253 |
| C3orf37     | 148 chr3  | 130479549 | 130482434 | 0.0203266 | chr3:13048  | 0.0203266 |
| hsa-mir-191 | 149 chr3  | 49033075  | 49033388  | 0.0203358 | chr3:04903  | 0.0203358 |
| NPAS2       | 150 chr2  | 100797754 | 100890106 | 0.0203557 | chr2:10080  | 0.0203557 |
| WASL        | 151 chr7  | 123173808 | 123180818 | 0.0203891 | chr7:12317  | 0.0203891 |
| TLX3        | 152 chr5  | 170663426 | 170671352 | 0.0203974 | chr5:17066  | 0.0203974 |
| INPP1       | 155 chr2  | 190912862 | 190935549 | 0.0204089 | chr2:19091  | 0.0204089 |
| KIAA1529    | 160 chr9  | 99037149  | 99041099  | 0.0205327 | chr9:09904  | 0.0205327 |
| WNT10A      | 165 chr2  | 219449290 | 219456401 | 0.0207381 | chr2:21945  | 0.0207381 |
| PAP2D       | 169 chr1  | 99240436  | 99248282  | 0.0207872 | chr1:09924  | 0.0207872 |
| FOXP1       | 176 chr3  | 71713510  | 71721352  | 0.021005  | chr3:07171  | 0.021005  |
| HNRPA2B1    | 178 chr7  | 26206937  | 26207413  | 0.0210199 | chr7:02620  | 0.0210199 |
| hsa-mir-26b | 182 chr2  | 218973058 | 218975676 | 0.0210799 | chr2:21897  | 0.0210799 |
| PTPN7       | 183 chr1  | 200382928 | 200402549 | 0.0210878 | chr1:20040  | 0.0210878 |
| MXD4        | 188 chr4  | 2219094   | 2239039   | 0.0211599 | chr4:00223  | 0.0211599 |
| SLC2A8      | 189 chr9  | 129195834 | 129201623 | 0.0211943 | chr9:12919  | 0.0211943 |
| HIP1        | 191 chr7  | 75203930  | 75211654  | 0.0212067 | chr7:07520  | 0.0212067 |
| GRIN1       | 193 chr9  | 139150207 | 139182893 | 0.0212242 | chr9:13915  | 0.0212242 |
| IRF5        | 195 chr7  | 128359964 | 128367934 | 0.0213019 | chr7:12836  | 0.0213019 |
| SLC1A1      | 199 chr9  | 4477626   | 4483166   | 0.0213524 | chr9:00448  | 0.0213524 |
| GABRA4      | 200 chr4  | 46688334  | 46695819  | 0.0214043 | chr4:04669  | 0.0214043 |
| VGF         | 209 chr7  | 100592498 | 100600494 | 0.0216518 | chr7:10059  | 0.0216518 |
| EPHA4       | 213 chr2  | 222142699 | 222150750 | 0.0216801 | chr2:22214  | 0.0216801 |
| CAV3        | 215 chr3  | 8744974   | 8752806   | 0.0217016 | chr3:00875  | 0.0217016 |
| SALL1       | 218 chr16 | 49740247  | 49748161  | 0.0217332 | chr16:0497  | 0.0217332 |
| STK19       | 221 chr6  | 32045556  | 32047476  | 0.021765  | chr6:03204  | 0.021765  |
| TPM3        | 223 chr1  | 152420235 | 152436473 | 0.0217764 | chr1:15243  | 0.0217764 |
| CACNA2D1    | 227 chr7  | 81908418  | 81916432  | 0.0218375 | chr7:08191  | 0.0218375 |
| FLJ44006-E  | 228 chr2  | 111592414 | 111594751 | 0.0218436 | chr2:11159  | 0.0218436 |
| NHLH1       | 231 chr1  | 158598313 | 158605306 | 0.0219468 | chr1:15860  | 0.0219468 |
| CLK2-HCN3   | 233 chr1  | 153509906 | 153513992 | 0.0219532 | chr1:15351  | 0.0219532 |
| B3GNT5      | 236 chr3  | 184448408 | 184456816 | 0.0219631 | chr3:18445  | 0.0219631 |
| ACAD11-UE   | 240 chr3  | 133861676 | 133861837 | 0.0220698 | chr3:13386  | 0.0220698 |
| SMAD1       | 243 chr4  | 146620440 | 146625588 | 0.022092  | chr4:14662  | 0.022092  |
| QRICH1      | 246 chr3  | 49104015  | 49108281  | 0.0221591 | chr3:04910  | 0.0221591 |
| PAX5        | 254 chr9  | 37021569  | 37029849  | 0.0222836 | chr9:03702  | 0.0222836 |
| BCAN        | 255 chr1  | 154874454 | 154881044 | 0.0223047 | chr1:15487  | 0.0223047 |
| RBM24       | 260 chr6  | 17385450  | 17393504  | 0.0223839 | chr6:01738  | 0.0223839 |

|           |           |           |           |           |             |           |
|-----------|-----------|-----------|-----------|-----------|-------------|-----------|
| UCN       | 261 chr2  | 27383753  | 27385341  | 0.0223955 | chr2:027384 | 0.0223955 |
| DUSP4     | 266 chr8  | 29259973  | 29269512  | 0.0225262 | chr8:029266 | 0.0225262 |
| ACTRT2    | 267 chr1  | 2922439   | 2930271   | 0.0225394 | chr1:002922 | 0.0225394 |
| IL12A     | 269 chr3  | 161184401 | 161191815 | 0.0225618 | chr3:161188 | 0.0225618 |
| ABCB4     | 271 chr7  | 86941062  | 86948414  | 0.0225671 | chr7:086943 | 0.0225671 |
| KLF9      | 272 chr9  | 72215686  | 72224882  | 0.022573  | chr9:072224 | 0.022573  |
| DDX41     | 274 chr5  | 176871201 | 176881919 | 0.022619  | chr5:176876 | 0.022619  |
| CDC20     | 277 chr1  | 43592810  | 43599989  | 0.0226574 | chr1:043596 | 0.0226574 |
| VAV2      | 280 chr9  | 135844705 | 135852525 | 0.0227044 | chr9:135848 | 0.0227044 |
| PTHR2     | 281 chr2  | 208974370 | 208982406 | 0.0227105 | chr2:208979 | 0.0227105 |
| CLSTN1    | 282 chr1  | 9804127   | 9808456   | 0.0227239 | chr1:009807 | 0.0227239 |
| DDIT4L    | 283 chr4  | 101328247 | 101335011 | 0.0227817 | chr4:101330 | 0.0227817 |
| FGD3      | 285 chr9  | 94771100  | 94779000  | 0.0228123 | chr9:094777 | 0.0228123 |
| MTAP      | 290 chr9  | 21787558  | 21795236  | 0.0228832 | chr9:021790 | 0.0228832 |
| YWHAG     | 291 chr7  | 75823582  | 75831693  | 0.0228977 | chr7:075826 | 0.0228977 |
| GPC1      | 292 chr2  | 241018393 | 241046572 | 0.0229095 | chr2:241022 | 0.0229095 |
| PREP      | 295 chr6  | 105955040 | 105963189 | 0.0229262 | chr6:105957 | 0.0229262 |
| CXCR3     | 296 chrX  | 70752514  | 70760534  | 0.0229322 | chrX:070751 | 0.0229322 |
| OGG1      | 297 chr3  | 9764769   | 9769369   | 0.0229448 | chr3:009766 | 0.0229448 |
| STC2      | 301 chr5  | 172685507 | 172693220 | 0.0230142 | chr5:172697 | 0.0230142 |
| PCDH7     | 306 chr4  | 30325765  | 30333629  | 0.0231396 | chr4:030329 | 0.0231396 |
| C7orf23   | 307 chr7  | 86684458  | 86692484  | 0.0231477 | chr7:086688 | 0.0231477 |
| GGN-SPRE  | 309 chr19 | 43570653  | 43572752  | 0.0231519 | chr19:04357 | 0.0231519 |
| JMJD2A    | 310 chr1  | 43883477  | 43943725  | 0.0231578 | chr1:043888 | 0.0231578 |
| HSPA9     | 313 chr5  | 137936402 | 137944495 | 0.023225  | chr5:137936 | 0.023225  |
| SERP1-EIF | 315 chr3  | 151747178 | 151747222 | 0.0232448 | chr3:151747 | 0.0232448 |
| PFKFB4    | 317 chr3  | 48566977  | 48574105  | 0.0232589 | chr3:048566 | 0.0232589 |
| CPLX1     | 321 chr4  | 807462    | 815393    | 0.023307  | chr4:000811 | 0.023307  |
| YARS      | 323 chr1  | 33056214  | 33061859  | 0.0233286 | chr1:033056 | 0.0233286 |
| FLJ35530  | 325 chr1  | 176773117 | 176781032 | 0.0233508 | chr1:176778 | 0.0233508 |
| DDR1      | 326 chr6  | 30954540  | 30966993  | 0.0233658 | chr6:030958 | 0.0233658 |
| SOHLH1-KC | 327 chr9  | 137731251 | 137733878 | 0.0233822 | chr9:137733 | 0.0233822 |
| EIF2AK3   | 328 chr2  | 88705846  | 88712132  | 0.0233842 | chr2:088708 | 0.0233842 |
| MEST      | 331 chr7  | 129907836 | 129925614 | 0.0234157 | chr7:129918 | 0.0234157 |
| PTP4A2    | 336 chr1  | 32155125  | 32180993  | 0.0234421 | chr1:032176 | 0.0234421 |
| MAG       | 339 chr19 | 40470076  | 40477136  | 0.0235008 | chr19:04047 | 0.0235008 |
| AQP3      | 341 chr9  | 33435370  | 33443007  | 0.023524  | chr9:033442 | 0.023524  |
| PDZRN3    | 343 chr3  | 73755465  | 73761775  | 0.0235395 | chr3:073756 | 0.0235395 |
| EPHA1     | 345 chr7  | 142814057 | 142820442 | 0.0235563 | chr7:142816 | 0.0235563 |
| SEMA3B    | 347 chr3  | 50276084  | 50289586  | 0.0236015 | chr3:050278 | 0.0236015 |
| CXCR4     | 354 chr2  | 136587636 | 136597329 | 0.0236563 | chr2:136592 | 0.0236563 |
| LMBR1     | 358 chr7  | 156377435 | 156382804 | 0.023705  | chr7:156378 | 0.023705  |
| LHX4      | 360 chr1  | 178460772 | 178468682 | 0.0237104 | chr1:178464 | 0.0237104 |
| ATP6V1G1  | 362 chr9  | 116385547 | 116392014 | 0.023746  | chr9:116389 | 0.023746  |
| GRPEL1    | 363 chr4  | 7118413   | 7126109   | 0.0237717 | chr4:007122 | 0.0237717 |
| IRX4      | 366 chr5  | 1933359   | 1941352   | 0.0237957 | chr5:001936 | 0.0237957 |
| CAP1      | 370 chr1  | 40273606  | 40281383  | 0.0238499 | chr1:040278 | 0.0238499 |
| NCOA2     | 372 chr8  | 71475532  | 71482796  | 0.0238625 | chr8:071478 | 0.0238625 |
| PCBP4     | 373 chr3  | 51966660  | 51977594  | 0.0238701 | chr3:051974 | 0.0238701 |
| DOLPP1    | 374 chr9  | 130878224 | 130885430 | 0.0238759 | chr9:130882 | 0.0238759 |
| OLIG3     | 378 chr6  | 137854555 | 137862683 | 0.0238982 | chr6:137860 | 0.0238982 |
| SPP1      | 380 chr4  | 89110341  | 89118198  | 0.0239053 | chr4:089111 | 0.0239053 |
| ATXN7L2   | 381 chr1  | 109826335 | 109836675 | 0.0239079 | chr1:109827 | 0.0239079 |
| MLLT3     | 388 chr9  | 20609815  | 20617918  | 0.0239368 | chr9:020611 | 0.0239368 |
| ZNF76     | 390 chr6  | 35333407  | 35371689  | 0.0239396 | chr6:035333 | 0.0239396 |
| STRN      | 393 chr2  | 37044751  | 37051179  | 0.0239641 | chr2:037047 | 0.0239641 |
| TICAM2    | 394 chr5  | 114989687 | 114995059 | 0.0239737 | chr5:114989 | 0.0239737 |
| DGKD      | 395 chr2  | 233922380 | 233930290 | 0.0240392 | chr2:233922 | 0.0240392 |

|             |           |           |           |           |             |           |
|-------------|-----------|-----------|-----------|-----------|-------------|-----------|
| BCL11A      | 403 chr2  | 60631441  | 60639618  | 0.0241361 | chr2:060631 | 0.0241361 |
| RAB1A       | 404 chr2  | 65208732  | 65215690  | 0.0241668 | chr2:065211 | 0.0241668 |
| NKX6-1      | 413 chr4  | 85635987  | 85643900  | 0.0243677 | chr4:085640 | 0.0243677 |
| YTHDF3      | 415 chr8  | 64238844  | 64246224  | 0.0244045 | chr8:064241 | 0.0244045 |
| CNTN2       | 417 chr1  | 203273560 | 203281360 | 0.0244447 | chr1:203271 | 0.0244447 |
| TACR1       | 421 chr2  | 75277135  | 75283259  | 0.0244669 | chr2:075280 | 0.0244669 |
| CCIN        | 422 chr9  | 36153921  | 36161884  | 0.0244697 | chr9:036151 | 0.0244697 |
| LOC253012   | 426 chr7  | 92694148  | 92699541  | 0.0244863 | chr7:092691 | 0.0244863 |
| VLDLR       | 427 chr9  | 2606300   | 2614584   | 0.024489  | chr9:002611 | 0.024489  |
| PTCHD1      | 429 chrX  | 23256567  | 23265464  | 0.0244921 | chrX:023261 | 0.0244921 |
| SLC10A6     | 431 chr4  | 87987127  | 87993404  | 0.0245195 | chr4:087981 | 0.0245195 |
| PPT2        | 432 chr6  | 32229349  | 32239429  | 0.0245365 | chr6:032221 | 0.0245365 |
| DLL1        | 433 chr6  | 170438814 | 170446929 | 0.0245383 | chr6:170441 | 0.0245383 |
| PASK-PPP1   | 434 chr2  | 241737643 | 241738586 | 0.0245407 | chr2:241731 | 0.0245407 |
| SMC2        | 436 chr9  | 105891088 | 105898457 | 0.0245743 | chr9:105891 | 0.0245743 |
| C6orf118    | 439 chr6  | 165640596 | 165647741 | 0.0245982 | chr6:165641 | 0.0245982 |
| WDR86       | 442 chr7  | 150735332 | 150741646 | 0.0246347 | chr7:150731 | 0.0246347 |
| ZNF367      | 443 chr9  | 98190119  | 98225919  | 0.0246377 | chr9:098221 | 0.0246377 |
| SLC38A3     | 448 chr3  | 50213447  | 50238611  | 0.024707  | chr3:050211 | 0.024707  |
| CENTB5-PL   | 449 chr1  | 1228614   | 1233777   | 0.0247196 | chr1:001230 | 0.0247196 |
| AGPAT1-RM   | 450 chr6  | 32253905  | 32254155  | 0.024723  | chr6:032251 | 0.024723  |
| CARD9       | 452 chr9  | 138385432 | 138389762 | 0.0247633 | chr9:138381 | 0.0247633 |
| C13orf27    | 458 chr13 | 102221663 | 102228942 | 0.0248345 | chr13:10221 | 0.0248345 |
| DENND2D     | 459 chr1  | 111542135 | 111549824 | 0.0248427 | chr1:111541 | 0.0248427 |
| GENX-3414   | 461 chr4  | 77441948  | 77449431  | 0.0248647 | chr4:077441 | 0.0248647 |
| PFKFB3      | 462 chr10 | 6279514   | 6287259   | 0.0248786 | chr10:00621 | 0.0248786 |
| EDN1        | 463 chr6  | 12393583  | 12401089  | 0.0248837 | chr6:012391 | 0.0248837 |
| GPATCH4     | 467 chr1  | 154835492 | 154840459 | 0.0249308 | chr1:154831 | 0.0249308 |
| PTPN18      | 469 chr2  | 130820778 | 130832496 | 0.0249565 | chr2:130821 | 0.0249565 |
| REEP5       | 472 chr5  | 112283696 | 112291312 | 0.0249956 | chr5:112281 | 0.0249956 |
| SIX3        | 473 chr2  | 45016844  | 45025237  | 0.025005  | chr2:045021 | 0.025005  |
| LZIC-NMNA   | 477 chr1  | 9925430   | 9925920   | 0.0250481 | chr1:009921 | 0.0250481 |
| MAD2L2-C1   | 478 chr1  | 11665135  | 11673715  | 0.025059  | chr1:011671 | 0.025059  |
| MAG1        | 479 chr4  | 84671252  | 84679009  | 0.0250766 | chr4:084671 | 0.0250766 |
| GPR37L1     | 481 chr1  | 200354497 | 200360633 | 0.0250907 | chr1:200351 | 0.0250907 |
| NFU1        | 482 chr2  | 69516126  | 69521743  | 0.0250948 | chr2:069511 | 0.0250948 |
| TBCC        | 483 chr6  | 42820225  | 42827881  | 0.0251129 | chr6:042821 | 0.0251129 |
| ACCN3       | 489 chr7  | 150373583 | 150379342 | 0.0252414 | chr7:150371 | 0.0252414 |
| C2orf52     | 495 chr2  | 232084090 | 232092704 | 0.0252964 | chr2:232081 | 0.0252964 |
| QKI         | 496 chr6  | 163750193 | 163758716 | 0.0252979 | chr6:163751 | 0.0252979 |
| GPSM3       | 497 chr6  | 32266519  | 32274351  | 0.0253057 | chr6:032271 | 0.0253057 |
| C5orf5      | 498 chr5  | 137394123 | 137402161 | 0.0253069 | chr5:137391 | 0.0253069 |
| GUP1        | 501 chr3  | 42714888  | 42723250  | 0.0253468 | chr3:042721 | 0.0253468 |
| PEX13       | 502 chr2  | 61092874  | 61098711  | 0.0253697 | chr2:061091 | 0.0253697 |
| DAXX        | 503 chr6  | 33394578  | 33399914  | 0.0253818 | chr6:033391 | 0.0253818 |
| DNAJB5      | 511 chr9  | 34974372  | 34982228  | 0.0254466 | chr9:034971 | 0.0254466 |
| ARRDC1      | 513 chr9  | 139616290 | 139622180 | 0.0254631 | chr9:139611 | 0.0254631 |
| KCNS3       | 516 chr2  | 17918108  | 17925900  | 0.0254803 | chr2:017921 | 0.0254803 |
| ATP6V0B     | 520 chr1  | 44211607  | 44216577  | 0.0255892 | chr1:044211 | 0.0255892 |
| RHOH        | 522 chr4  | 39869807  | 39877569  | 0.025615  | chr4:039871 | 0.025615  |
| RAMP1       | 525 chr2  | 238428661 | 238435583 | 0.0256269 | chr2:238431 | 0.0256269 |
| hsa-mir-135 | 528 chr1  | 203681669 | 203689554 | 0.0257252 | chr1:203681 | 0.0257252 |
| BCL6        | 529 chr3  | 188935100 | 188951646 | 0.0257387 | chr3:188941 | 0.0257387 |
| RAD52       | 530 chr12 | 928625    | 934539    | 0.0257428 | chr12:00091 | 0.0257428 |
| EYA3        | 532 chr1  | 28285253  | 28293054  | 0.0257611 | chr1:028281 | 0.0257611 |
| CCK         | 534 chr3  | 42277697  | 42286838  | 0.0257673 | chr3:042281 | 0.0257673 |
| BARHL2      | 541 chr1  | 90952955  | 90960819  | 0.0258815 | chr1:090951 | 0.0258815 |
| TRAIIP      | 542 chr3  | 49868213  | 49870295  | 0.0258872 | chr3:049861 | 0.0258872 |

|           |     |       |           |           |           |             |           |
|-----------|-----|-------|-----------|-----------|-----------|-------------|-----------|
| TNNT2     | 546 | chr1  | 199611036 | 199616604 | 0.0259228 | chr1:199616 | 0.0259228 |
| FBXO32    | 547 | chr8  | 124619959 | 124628142 | 0.0259312 | chr8:124622 | 0.0259312 |
| STK11     | 548 | chr19 | 1154464   | 1160130   | 0.0259406 | chr19:00115 | 0.0259406 |
| LRRC4     | 551 | chr7  | 127455630 | 127463619 | 0.0259891 | chr7:127455 | 0.0259891 |
| MTA3      | 556 | chr2  | 42645014  | 42651099  | 0.026025  | chr2:042645 | 0.026025  |
| NUP210    | 558 | chr3  | 13434420  | 13441860  | 0.0260282 | chr3:013434 | 0.0260282 |
| D4S234E   | 561 | chr4  | 4434346   | 4442396   | 0.0260482 | chr4:004434 | 0.0260482 |
| TNFAIP8   | 562 | chr5  | 118714137 | 118722086 | 0.0260512 | chr5:118714 | 0.0260512 |
| ZMIZ2     | 565 | chr7  | 44756805  | 44764269  | 0.026083  | chr7:044756 | 0.026083  |
| COL27A1   | 566 | chr9  | 115952688 | 115960507 | 0.0260947 | chr9:115956 | 0.0260947 |
| HNRPK-RM  | 567 | chr9  | 85785392  | 85785436  | 0.0261113 | chr9:085785 | 0.0261113 |
| DUSP2     | 568 | chr2  | 96172645  | 96180237  | 0.0261204 | chr2:096172 | 0.0261204 |
| CRMP1     | 569 | chr4  | 5938876   | 5951007   | 0.0261222 | chr4:005942 | 0.0261222 |
| GRIK3     | 570 | chr1  | 37269815  | 37277514  | 0.0261297 | chr1:037272 | 0.0261297 |
| ZBTB8OS-F | 582 | chr1  | 32888815  | 32889311  | 0.0262467 | chr1:032888 | 0.0262467 |
| IRX5      | 584 | chr16 | 53517129  | 53525100  | 0.0262672 | chr16:05352 | 0.0262672 |
| KCTD17    | 586 | chr22 | 35772056  | 35780226  | 0.026283  | chr22:03577 | 0.026283  |
| ATF2      | 588 | chr2  | 175739215 | 175746660 | 0.0262898 | chr2:175746 | 0.0262898 |
| FZD9      | 589 | chr7  | 72480934  | 72488755  | 0.0262901 | chr7:072482 | 0.0262901 |
| TNXB      | 590 | chr6  | 32119533  | 32190563  | 0.026291  | chr6:032122 | 0.026291  |
| CAMK2A    | 592 | chr5  | 149647122 | 149654978 | 0.0263208 | chr5:149654 | 0.0263208 |
| ST6GALNA  | 594 | chr1  | 76307640  | 76315346  | 0.0263384 | chr1:076312 | 0.0263384 |
| LRBA      | 600 | chr4  | 152152917 | 152161334 | 0.0263771 | chr4:152156 | 0.0263771 |
| PRDM12    | 603 | chr9  | 132524561 | 132532371 | 0.026391  | chr9:132527 | 0.026391  |
| TMEM150   | 605 | chr2  | 85680835  | 85687309  | 0.0264175 | chr2:085683 | 0.0264175 |
| GLO1      | 606 | chr6  | 38776467  | 38780595  | 0.0264213 | chr6:038777 | 0.0264213 |
| CD55      | 607 | chr1  | 205556187 | 205564153 | 0.0264295 | chr1:205566 | 0.0264295 |
| ZCCHC9    | 610 | chr5  | 80627853  | 80635712  | 0.0264438 | chr5:080633 | 0.0264438 |
| THRB      | 612 | chr3  | 24509172  | 24516006  | 0.0264693 | chr3:024511 | 0.0264693 |
| ACO1      | 613 | chr9  | 32369164  | 32377179  | 0.02647   | chr9:032372 | 0.02647   |
| RSPO3     | 619 | chr6  | 127476799 | 127484480 | 0.0265149 | chr6:127487 | 0.0265149 |
| LMAN2-RG  | 622 | chr5  | 176711233 | 176717465 | 0.0265412 | chr5:176711 | 0.0265412 |
| HOXD8     | 625 | chr2  | 176697833 | 176705685 | 0.0265818 | chr2:176697 | 0.0265818 |
| HSPA1L-HS | 627 | chr6  | 31890798  | 31891006  | 0.026609  | chr6:031890 | 0.026609  |
| MCM2      | 628 | chr3  | 128792006 | 128802332 | 0.0266208 | chr3:128792 | 0.0266208 |
| PGAM1     | 629 | chr10 | 99170876  | 99178561  | 0.0266398 | chr10:09917 | 0.0266398 |
| CXCL3     | 635 | chr4  | 75120874  | 75128728  | 0.0266956 | chr4:075122 | 0.0266956 |
| HAX1      | 637 | chr1  | 152510065 | 152514225 | 0.026709  | chr1:152511 | 0.026709  |
| MANEAL    | 639 | chr1  | 38027062  | 38035362  | 0.026723  | chr1:038032 | 0.026723  |
| GPX7      | 640 | chr1  | 52837374  | 52842964  | 0.0267237 | chr1:052840 | 0.0267237 |
| HS6ST1    | 641 | chr2  | 128790196 | 128798236 | 0.0267266 | chr2:128792 | 0.0267266 |
| CSNK1A1   | 642 | chr5  | 148908736 | 148916671 | 0.0267272 | chr5:148911 | 0.0267272 |
| LY6H      | 644 | chr8  | 144309998 | 144314595 | 0.0267516 | chr8:144312 | 0.0267516 |
| EXOSC4    | 649 | chr8  | 145200401 | 145207479 | 0.02679   | chr8:145205 | 0.02679   |
| WDR41     | 653 | chr5  | 76822111  | 76825409  | 0.0268437 | chr5:076822 | 0.0268437 |
| EMID2     | 657 | chr7  | 100787656 | 100795377 | 0.0268664 | chr7:100795 | 0.0268664 |
| LCP2      | 658 | chr5  | 169654831 | 169662904 | 0.0268726 | chr5:169660 | 0.0268726 |
| SLC25A10  | 660 | chr17 | 77285089  | 77292333  | 0.0268936 | chr17:07728 | 0.0268936 |
| GPT       | 661 | chr8  | 145698369 | 145703364 | 0.0268973 | chr8:145699 | 0.0268973 |
| AIM1L     | 674 | chr1  | 26552976  | 26558481  | 0.0270509 | chr1:026555 | 0.0270509 |
| SPRY1     | 677 | chr4  | 124532090 | 124542616 | 0.0270734 | chr4:124532 | 0.0270734 |
| PHF2      | 686 | chr9  | 95375119  | 95381201  | 0.0271329 | chr9:095377 | 0.0271329 |
| FGR       | 688 | chr1  | 27820635  | 27839481  | 0.0271617 | chr1:027832 | 0.0271617 |
| MXD3      | 689 | chr5  | 176666803 | 176675228 | 0.0271685 | chr5:176672 | 0.0271685 |
| HSDL2     | 691 | chr9  | 114179057 | 114183281 | 0.0271789 | chr9:114181 | 0.0271789 |
| HBM       | 693 | chr16 | 150919    | 156753    | 0.027193  | chr16:00015 | 0.027193  |
| TREML4    | 695 | chr6  | 41298691  | 41306495  | 0.0272008 | chr6:041302 | 0.0272008 |
| GULP1     | 696 | chr2  | 188859436 | 188865605 | 0.0272009 | chr2:188865 | 0.0272009 |

|            |           |           |           |           |             |           |
|------------|-----------|-----------|-----------|-----------|-------------|-----------|
| DKFZP686/  | 702 chr4  | 41054541  | 41237187  | 0.0272567 | chr4:041051 | 0.0272567 |
| FLJ43879   | 703 chr2  | 239497026 | 239517832 | 0.0272851 | chr2:239514 | 0.0272851 |
| IARS       | 709 chr9  | 94089621  | 94101179  | 0.0273525 | chr9:094095 | 0.0273525 |
| GLS        | 711 chr2  | 191448414 | 191456489 | 0.027365  | chr2:191453 | 0.027365  |
| HSPC049    | 713 chr7  | 134544393 | 134551106 | 0.0273841 | chr7:134546 | 0.0273841 |
| ITGB8      | 715 chr7  | 20332268  | 20340474  | 0.0273881 | chr7:020336 | 0.0273881 |
| MMEL1      | 716 chr1  | 2552498   | 2559059   | 0.0273905 | chr1:002555 | 0.0273905 |
| MGC33600   | 719 chr6  | 44371072  | 44374726  | 0.0274104 | chr6:044374 | 0.0274104 |
| C6orf167   | 720 chr6  | 97834685  | 97843262  | 0.0274272 | chr6:097837 | 0.0274272 |
| GALNT10    | 723 chr5  | 153545635 | 153553051 | 0.0274769 | chr5:153549 | 0.0274769 |
| MXI1       | 726 chr10 | 111951945 | 111978427 | 0.0274946 | chr10:11195 | 0.0274946 |
| STXBP5     | 731 chr6  | 147561292 | 147569872 | 0.0275041 | chr6:147566 | 0.0275041 |
| RGS12      | 732 chr4  | 3282163   | 3411458   | 0.0275045 | chr4:003333 | 0.0275045 |
| PPFIA4     | 735 chr1  | 201281462 | 201289968 | 0.0275468 | chr1:201285 | 0.0275468 |
| hsa-mir-31 | 737 chr9  | 21500014  | 21507509  | 0.0275852 | chr9:021502 | 0.0275852 |
| IMPDH2     | 738 chr3  | 49036461  | 49047287  | 0.0275868 | chr3:049042 | 0.0275868 |
| WNT7A      | 739 chr3  | 13893879  | 13902053  | 0.0276005 | chr3:013897 | 0.0276005 |
| TSNARE1    | 740 chr8  | 143479961 | 143487625 | 0.0276009 | chr8:143483 | 0.0276009 |
| BARX1      | 741 chr9  | 95755130  | 95762927  | 0.0276147 | chr9:095757 | 0.0276147 |
| PPP2R4     | 742 chr9  | 130913046 | 130917729 | 0.0276196 | chr9:130913 | 0.0276196 |
| ENO1       | 744 chr1  | 8858784   | 8866577   | 0.0276506 | chr1:008867 | 0.0276506 |
| ELL3       | 749 chr15 | 41853899  | 41857854  | 0.0277097 | chr15:04185 | 0.0277097 |
| PTGER4     | 755 chr5  | 40710590  | 40718169  | 0.0277733 | chr5:040711 | 0.0277733 |
| FUT10      | 760 chr8  | 33436049  | 33450473  | 0.0278203 | chr8:033450 | 0.0278203 |
| AMPD2      | 762 chr1  | 109964072 | 109967725 | 0.0278317 | chr1:109964 | 0.0278317 |
| LGI2       | 766 chr4  | 24638924  | 24646859  | 0.0279163 | chr4:024642 | 0.0279163 |
| SORBS3     | 767 chr8  | 22459925  | 22488965  | 0.0279166 | chr8:022463 | 0.0279166 |
| CNNM3      | 772 chr2  | 96841459  | 96849085  | 0.0279553 | chr2:096845 | 0.0279553 |
| SLC30A3    | 773 chr2  | 27336823  | 27341804  | 0.0279569 | chr2:027347 | 0.0279569 |
| NDST1      | 774 chr5  | 149875536 | 149883101 | 0.0279742 | chr5:149875 | 0.0279742 |
| S100A14    | 775 chr1  | 151853399 | 151857917 | 0.0279764 | chr1:151855 | 0.0279764 |
| CRYBA2     | 776 chr2  | 219563253 | 219574155 | 0.0279789 | chr2:219566 | 0.0279789 |
| NR3C2      | 777 chr4  | 149575139 | 149588399 | 0.0279828 | chr4:149585 | 0.0279828 |
| GLB1       | 778 chr3  | 33113339  | 33118601  | 0.027988  | chr3:033113 | 0.027988  |
| BBS7       | 779 chr4  | 122965150 | 123016352 | 0.0279956 | chr4:123011 | 0.0279956 |
| FBXW11     | 780 chr5  | 171364023 | 171370174 | 0.0279979 | chr5:171366 | 0.0279979 |
| HOXA6      | 781 chr7  | 27151643  | 27159369  | 0.0280061 | chr7:027154 | 0.0280061 |
| SH3BP5L    | 785 chr1  | 247083287 | 247089084 | 0.0280276 | chr1:247087 | 0.0280276 |
| GLRA1      | 788 chr5  | 151281783 | 151289934 | 0.0280797 | chr5:151284 | 0.0280797 |
| CCDC18     | 790 chr1  | 93413399  | 93418502  | 0.0281132 | chr1:093418 | 0.0281132 |
| KCNC4      | 791 chr1  | 110550096 | 110558117 | 0.028114  | chr1:110551 | 0.028114  |
| hsa-mir-22 | 795 chr17 | 1563973   | 1566224   | 0.0281394 | chr17:00156 | 0.0281394 |
| SFRS3      | 805 chr6  | 36665106  | 36672411  | 0.0281804 | chr6:036666 | 0.0281804 |
| SLC25A32   | 807 chr8  | 104496259 | 104501927 | 0.0281872 | chr8:104496 | 0.0281872 |
| HR         | 812 chr8  | 22027934  | 22049163  | 0.0282494 | chr8:022045 | 0.0282494 |
| ZAR1       | 814 chr4  | 48185946  | 48189571  | 0.028265  | chr4:048186 | 0.028265  |
| TFAP2A     | 816 chr6  | 10517551  | 10528716  | 0.0282817 | chr6:010520 | 0.0282817 |
| LHX5       | 817 chr12 | 112391238 | 112399766 | 0.0282875 | chr12:11239 | 0.0282875 |
| RUNX3      | 818 chr1  | 25126484  | 25169637  | 0.0282903 | chr1:025137 | 0.0282903 |
| STEAP3     | 824 chr2  | 119692579 | 119700377 | 0.0283425 | chr2:119697 | 0.0283425 |
| SFRS7      | 827 chr2  | 38829585  | 38837482  | 0.0283656 | chr2:038833 | 0.0283656 |
| TSPAN17    | 829 chr5  | 176001808 | 176008946 | 0.0283793 | chr5:176004 | 0.0283793 |
| HES2-ESPT  | 832 chr1  | 6402641   | 6407432   | 0.0284027 | chr1:006403 | 0.0284027 |
| CGI-38     | 834 chr16 | 65980072  | 65985733  | 0.0284048 | chr16:06598 | 0.0284048 |
| PRKCZ      | 836 chr1  | 1966383   | 1974356   | 0.0284129 | chr1:001977 | 0.0284129 |
| C3orf22    | 837 chr3  | 127758062 | 127760737 | 0.0284168 | chr3:127760 | 0.0284168 |
| NPDC1      | 838 chr9  | 139057753 | 139062127 | 0.0284236 | chr9:139062 | 0.0284236 |
| IL3        | 839 chr5  | 131418886 | 131426827 | 0.0284385 | chr5:131426 | 0.0284385 |

|             |      |       |           |           |           |             |           |
|-------------|------|-------|-----------|-----------|-----------|-------------|-----------|
| LHX3        | 841  | chr9  | 138232230 | 138237921 | 0.0284628 | chr9:138237 | 0.0284628 |
| HIGD2A      | 842  | chr5  | 175743540 | 175750669 | 0.0284727 | chr5:175743 | 0.0284727 |
| DSCR1L2     | 853  | chr1  | 24696458  | 24704279  | 0.0285764 | chr1:02470  | 0.0285764 |
| RBPSUH      | 860  | chr4  | 25927647  | 25934174  | 0.0286376 | chr4:025930 | 0.0286376 |
| ID2         | 861  | chr2  | 8734202   | 8742237   | 0.028641  | chr2:008736 | 0.028641  |
| YTHDC1      | 869  | chr4  | 68895617  | 68902743  | 0.0287171 | chr4:068898 | 0.0287171 |
| hsa-mir-130 | 871  | chr22 | 20328561  | 20339293  | 0.0287342 | chr22:02030 | 0.0287342 |
| CHCHD5      | 879  | chr2  | 113057306 | 113060380 | 0.0288279 | chr2:113058 | 0.0288279 |
| CASD1       | 880  | chr7  | 93973164  | 93979790  | 0.0288337 | chr7:093976 | 0.0288337 |
| PFKP        | 881  | chr10 | 3096351   | 3102174   | 0.0288388 | chr10:00309 | 0.0288388 |
| SHB         | 883  | chr9  | 38056541  | 38064093  | 0.0288495 | chr9:038059 | 0.0288495 |
| LBXCOR1     | 884  | chr15 | 65899562  | 65907655  | 0.02886   | chr15:06590 | 0.02886   |
| ACA36       | 885  | chrX  | 153644412 | 153646868 | 0.028862  | chrX:15364  | 0.028862  |
| HOXA1       | 886  | chr7  | 27099685  | 27106440  | 0.0288867 | chr7:027102 | 0.0288867 |
| CDC25A      | 890  | chr3  | 48202370  | 48207656  | 0.0289031 | chr3:048202 | 0.0289031 |
| CYP26A1     | 892  | chr10 | 94818426  | 94826580  | 0.0289374 | chr10:09482 | 0.0289374 |
| TCF7        | 898  | chr5  | 133473021 | 133482019 | 0.0289561 | chr5:133473 | 0.0289561 |
| UBXD8       | 899  | chr5  | 175803933 | 175810131 | 0.0289611 | chr5:175803 | 0.0289611 |
| DNTTIP2     | 900  | chr1  | 94114833  | 94122471  | 0.0289646 | chr1:094117 | 0.0289646 |
| GSN         | 903  | chr9  | 123064818 | 123104361 | 0.0289681 | chr9:123097 | 0.0289681 |
| GMPPA       | 906  | chr2  | 220066559 | 220073536 | 0.0289948 | chr2:220068 | 0.0289948 |
| ADPRHL2     | 907  | chr1  | 36326541  | 36329613  | 0.028995  | chr1:036326 | 0.028995  |
| CCNE1       | 908  | chr19 | 34989239  | 34997901  | 0.0290026 | chr19:03499 | 0.0290026 |
| SMARCAL1    | 911  | chr2  | 216979953 | 216990099 | 0.0290198 | chr2:216988 | 0.0290198 |
| PEX10       | 917  | chr1  | 2331438   | 2339051   | 0.0290605 | chr1:002332 | 0.0290605 |
| NES         | 918  | chr1  | 154911391 | 154919076 | 0.0290665 | chr1:154911 | 0.0290665 |
| C9orf128-C  | 921  | chr9  | 35818778  | 35819167  | 0.0290884 | chr9:035818 | 0.0290884 |
| HOXA11      | 923  | chr7  | 27187279  | 27196872  | 0.0291017 | chr7:027192 | 0.0291017 |
| CPZ         | 924  | chr4  | 8640399   | 8647960   | 0.029102  | chr4:008642 | 0.029102  |
| C7orf27-IQ  | 927  | chr7  | 2561669   | 2564657   | 0.0291118 | chr7:002562 | 0.0291118 |
| SAMD12      | 928  | chr8  | 119701542 | 119708655 | 0.029127  | chr8:119703 | 0.029127  |
| P4HA2       | 930  | chr5  | 131588176 | 131596327 | 0.0291288 | chr5:131590 | 0.0291288 |
| YWHAZ       | 931  | chr8  | 102031038 | 102040188 | 0.0291498 | chr8:102032 | 0.0291498 |
| TRIP12-FB   | 933  | chr2  | 230494941 | 230495407 | 0.0291751 | chr2:230495 | 0.0291751 |
| SHROOM1     | 935  | chr5  | 132187335 | 132195353 | 0.0291799 | chr5:132195 | 0.0291799 |
| SGK         | 936  | chr6  | 134535372 | 134542742 | 0.0291896 | chr6:134535 | 0.0291896 |
| STAT3       | 939  | chr17 | 37792251  | 37798886  | 0.0291984 | chr17:03779 | 0.0291984 |
| TBC1D19     | 946  | chr4  | 26189434  | 26195504  | 0.0292901 | chr4:026192 | 0.0292901 |
| UBQLN4-M    | 947  | chr1  | 154290320 | 154291196 | 0.029298  | chr1:15429  | 0.029298  |
| TNRC4       | 949  | chr1  | 149952721 | 149961400 | 0.029339  | chr1:149955 | 0.029339  |
| PCSK6       | 953  | chr15 | 99844885  | 99852818  | 0.0293748 | chr15:09985 | 0.0293748 |
| C1orf90     | 955  | chr1  | 32477525  | 32487070  | 0.0293968 | chr1:032477 | 0.0293968 |
| GRM4        | 958  | chr6  | 34206920  | 34214870  | 0.0294367 | chr6:034210 | 0.0294367 |
| SFTP        | 959  | chr2  | 85746551  | 85754343  | 0.029447  | chr2:085745 | 0.029447  |
| TBX20       | 960  | chr7  | 35257312  | 35265271  | 0.0294635 | chr7:035262 | 0.0294635 |
| TMEM161B    | 966  | chr5  | 87597895  | 87605154  | 0.0295579 | chr5:087600 | 0.0295579 |
| SLC16A2     | 971  | chrX  | 73552308  | 73560439  | 0.0295889 | chrX:073555 | 0.0295889 |
| LFNG        | 972  | chr7  | 2518509   | 2526453   | 0.0295911 | chr7:002519 | 0.0295911 |
| MTPN        | 974  | chr7  | 135310129 | 135316678 | 0.0296206 | chr7:135312 | 0.0296206 |
| DOCK9       | 976  | chr13 | 98534173  | 98541829  | 0.0296242 | chr13:09853 | 0.0296242 |
| HTR1A       | 977  | chr5  | 63290850  | 63298796  | 0.0296339 | chr5:063292 | 0.0296339 |
| ZBTB7B      | 978  | chr1  | 153243717 | 153256275 | 0.0296345 | chr1:153248 | 0.0296345 |
| DLG3        | 983  | chrX  | 69578415  | 69584250  | 0.0296685 | chrX:069583 | 0.0296685 |
| ERGIC1      | 985  | chr5  | 172188658 | 172266814 | 0.0296899 | chr5:172262 | 0.0296899 |
| ZNF678      | 988  | chr1  | 225812689 | 225918037 | 0.0297109 | chr1:225812 | 0.0297109 |
| ST3GAL1     | 989  | chr8  | 134651076 | 134657028 | 0.0297138 | chr8:134652 | 0.0297138 |
| RNF44-PCL   | 990  | chr5  | 175899315 | 175907020 | 0.0297143 | chr5:175907 | 0.0297143 |
| CCDC21      | 1003 | chr1  | 26427832  | 26477892  | 0.0297701 | chr1:026432 | 0.0297701 |



|             |            |           |           |           |             |           |
|-------------|------------|-----------|-----------|-----------|-------------|-----------|
| MSL3L1      | 1004 chrX  | 11680783  | 11688810  | 0.0297828 | chrX:011683 | 0.0297828 |
| NRP1        | 1006 chr10 | 33661056  | 33669255  | 0.0297928 | chr10:03366 | 0.0297928 |
| SYPL1       | 1011 chr7  | 105537554 | 105543433 | 0.0298335 | chr7:105540 | 0.0298335 |
| PHPT1       | 1012 chr9  | 138861733 | 138865317 | 0.0298367 | chr9:138862 | 0.0298367 |
| PHC2        | 1013 chr1  | 33585481  | 33618387  | 0.0298372 | chr1:033617 | 0.0298372 |
| TINAGL1     | 1022 chr1  | 31809448  | 31817777  | 0.0299216 | chr1:031814 | 0.0299216 |
| FARSLA-C/   | 1026 chr19 | 12905597  | 12910320  | 0.0299623 | chr19:01290 | 0.0299623 |
| HOXA7       | 1027 chr7  | 27160181  | 27168252  | 0.0299688 | chr7:027160 | 0.0299688 |
| TIAL1       | 1029 chr10 | 121341027 | 121348641 | 0.0299751 | chr10:12134 | 0.0299751 |
| MGST3       | 1032 chr1  | 163861746 | 163887480 | 0.0300646 | chr1:163860 | 0.0300646 |
| SPOP        | 1042 chr17 | 45108455  | 45115188  | 0.0301295 | chr17:04511 | 0.0301295 |
| KCNA2       | 1043 chr1  | 110946731 | 110955384 | 0.030142  | chr1:110952 | 0.030142  |
| LIN28       | 1044 chr1  | 26604462  | 26626821  | 0.0301477 | chr1:026600 | 0.0301477 |
| UBE2J2-SC   | 1047 chr1  | 1199161   | 1207310   | 0.0301735 | chr1:001199 | 0.0301735 |
| HTRA4       | 1051 chr8  | 38945472  | 38953420  | 0.0302049 | chr8:038940 | 0.0302049 |
| ACCN4       | 1056 chr2  | 220081805 | 220111756 | 0.0302307 | chr2:220080 | 0.0302307 |
| NUP133      | 1059 chr1  | 227708297 | 227714644 | 0.0302477 | chr1:227710 | 0.0302477 |
| CLDN19      | 1061 chr1  | 42976249  | 42983889  | 0.0302649 | chr1:042970 | 0.0302649 |
| LOC401565   | 1066 chr9  | 139262223 | 139265508 | 0.030287  | chr9:139262 | 0.030287  |
| NXT1        | 1067 chr20 | 23274099  | 23281714  | 0.0302917 | chr20:02327 | 0.0302917 |
| RNGTT       | 1071 chr6  | 89729462  | 89732025  | 0.0303054 | chr6:089730 | 0.0303054 |
| TNK2        | 1076 chr3  | 197104498 | 197124860 | 0.0303217 | chr3:197120 | 0.0303217 |
| CKMT2       | 1082 chr5  | 80559422  | 80567305  | 0.0303829 | chr5:080560 | 0.0303829 |
| SPEN        | 1087 chr1  | 16041448  | 16049379  | 0.0304245 | chr1:016040 | 0.0304245 |
| DBT         | 1093 chr1  | 100486410 | 100492602 | 0.030478  | chr1:100480 | 0.030478  |
| SMC4        | 1097 chr3  | 161600206 | 161607694 | 0.0304945 | chr3:161600 | 0.0304945 |
| POPDC2      | 1104 chr3  | 120859696 | 120865728 | 0.0305344 | chr3:120860 | 0.0305344 |
| CDGAP       | 1106 chr3  | 120492349 | 120498330 | 0.0305458 | chr3:120490 | 0.0305458 |
| WNT9A       | 1107 chr1  | 226199880 | 226207698 | 0.0305534 | chr1:226200 | 0.0305534 |
| DRD1        | 1113 chr5  | 174800475 | 174808536 | 0.0306252 | chr5:174800 | 0.0306252 |
| hsa-mir-7-1 | 1115 chr9  | 85774581  | 85784514  | 0.0306453 | chr9:085780 | 0.0306453 |
| ACOT11      | 1116 chr1  | 54781044  | 54788719  | 0.0306608 | chr1:054780 | 0.0306608 |
| CD72        | 1117 chr9  | 35606011  | 35613535  | 0.0306643 | chr9:035600 | 0.0306643 |
| REEP4       | 1118 chr8  | 22052576  | 22060130  | 0.0306654 | chr8:022050 | 0.0306654 |
| LRRFIP2     | 1121 chr3  | 37188865  | 37197051  | 0.0306895 | chr3:037190 | 0.0306895 |
| OSBPL3      | 1123 chr7  | 24984163  | 24991722  | 0.0307027 | chr7:024980 | 0.0307027 |
| C1orf76     | 1127 chr1  | 177977826 | 177981341 | 0.0307185 | chr1:177970 | 0.0307185 |
| DISC1       | 1129 chr1  | 229823673 | 229831531 | 0.0307358 | chr1:229820 | 0.0307358 |
| INMT        | 1131 chr7  | 30753067  | 30760323  | 0.0307506 | chr7:030750 | 0.0307506 |
| GPR17       | 1132 chr2  | 128115002 | 128126676 | 0.0307537 | chr2:128110 | 0.0307537 |
| PCBP1       | 1134 chr2  | 70163770  | 70170849  | 0.0307586 | chr2:070160 | 0.0307586 |
| IPPK        | 1135 chr9  | 94469621  | 94477523  | 0.0307741 | chr9:094470 | 0.0307741 |
| APOBEC2     | 1136 chr6  | 41120225  | 41131343  | 0.0307989 | chr6:041120 | 0.0307989 |
| MFSD3       | 1138 chr8  | 145703542 | 145707324 | 0.0308162 | chr8:145700 | 0.0308162 |
| CALCA       | 1139 chr11 | 14947915  | 14955703  | 0.0308264 | chr11:01490 | 0.0308264 |
| HSD17B10    | 1143 chrX  | 53475554  | 53483296  | 0.0308485 | chrX:053470 | 0.0308485 |
| VSTM2       | 1144 chr7  | 54572772  | 54580325  | 0.0308535 | chr7:054570 | 0.0308535 |
| GPR124      | 1154 chr8  | 37768528  | 37776429  | 0.0309006 | chr8:037770 | 0.0309006 |
| GPR55       | 1160 chr2  | 231496174 | 231503247 | 0.0309217 | chr2:231490 | 0.0309217 |
| PNMA2       | 1161 chr8  | 26424857  | 26432849  | 0.0309517 | chr8:026420 | 0.0309517 |
| SPAG6       | 1169 chr10 | 22668955  | 22676858  | 0.0310126 | chr10:02266 | 0.0310126 |
| PLK3        | 1179 chr1  | 45036593  | 45044203  | 0.0310809 | chr1:045030 | 0.0310809 |
| LRRN1       | 1180 chr3  | 3811736   | 3819044   | 0.0310836 | chr3:003810 | 0.0310836 |
| CXXC5       | 1187 chr5  | 139002700 | 139010649 | 0.0311149 | chr5:139000 | 0.0311149 |
| MMD2        | 1191 chr7  | 4962993   | 4969890   | 0.0311317 | chr7:004960 | 0.0311317 |
| SNCA        | 1197 chr4  | 90974141  | 90982556  | 0.0311704 | chr4:090970 | 0.0311704 |
| SNAP23      | 1208 chr15 | 40569749  | 40575878  | 0.0312268 | chr15:04050 | 0.0312268 |
| GNB2L1      | 1209 chr5  | 180601099 | 180608950 | 0.0312403 | chr5:180600 | 0.0312403 |

|             |            |           |           |           |             |           |
|-------------|------------|-----------|-----------|-----------|-------------|-----------|
| COL12A1     | 1210 chr6  | 75969821  | 75977280  | 0.0312464 | chr6:075972 | 0.0312464 |
| PLEC1       | 1216 chr8  | 145083274 | 145123215 | 0.0312614 | chr8:145119 | 0.0312614 |
| RET         | 1218 chr10 | 42887078  | 42895112  | 0.0312775 | chr10:04289 | 0.0312775 |
| NETO1       | 1223 chr18 | 68681471  | 68690910  | 0.0313231 | chr18:06868 | 0.0313231 |
| KLHL20      | 1224 chr1  | 171945711 | 171953841 | 0.0313235 | chr1:171950 | 0.0313235 |
| PDE6D-CO    | 1225 chr2  | 232354279 | 232359319 | 0.0313239 | chr2:232359 | 0.0313239 |
| SLC31A1     | 1231 chr9  | 115018404 | 115026138 | 0.0313614 | chr9:115026 | 0.0313614 |
| hsa-mir-149 | 1234 chr2  | 241038637 | 241044013 | 0.0313658 | chr2:241044 | 0.0313658 |
| DZIP1L      | 1235 chr3  | 139314965 | 139322407 | 0.0313672 | chr3:139317 | 0.0313672 |
| KPNA4       | 1237 chr3  | 161764205 | 161771154 | 0.031376  | chr3:161766 | 0.031376  |
| KCNIP4      | 1240 chr4  | 20490977  | 21563714  | 0.0313851 | chr4:021559 | 0.0313851 |
| CEBPZ-PR1   | 1241 chr2  | 37312235  | 37312279  | 0.0313976 | chr2:037312 | 0.0313976 |
| LRPAP1      | 1245 chr4  | 3501501   | 3505937   | 0.0314252 | chr4:003504 | 0.0314252 |
| LRIG2       | 1246 chr1  | 113412717 | 113419782 | 0.0314258 | chr1:113417 | 0.0314258 |
| SH2D3C      | 1250 chr9  | 129540534 | 129579973 | 0.0314798 | chr9:129579 | 0.0314798 |
| CD177       | 1253 chr19 | 48548243  | 48551509  | 0.0315019 | chr19:04854 | 0.0315019 |
| CHERP       | 1259 chr19 | 16512835  | 16519347  | 0.0315532 | chr19:01651 | 0.0315532 |
| ANKMY1-D    | 1265 chr2  | 241146178 | 241148103 | 0.0315846 | chr2:241147 | 0.0315846 |
| FAM36A      | 1266 chr1  | 243060417 | 243067931 | 0.0315937 | chr1:243066 | 0.0315937 |
| C8orf55     | 1267 chr8  | 143801747 | 143806960 | 0.0315953 | chr8:143806 | 0.0315953 |
| ARHGEF4     | 1272 chr2  | 131385186 | 131393146 | 0.0316156 | chr2:131389 | 0.0316156 |
| PDGFRB-C    | 1284 chr5  | 149517036 | 149525431 | 0.0316912 | chr5:149521 | 0.0316912 |
| SOX17       | 1292 chr8  | 55527789  | 55535760  | 0.0317087 | chr8:055529 | 0.0317087 |
| FIBCD1      | 1294 chr9  | 132801485 | 132809525 | 0.0317664 | chr9:132808 | 0.0317664 |
| RPIA        | 1297 chr2  | 88767770  | 88775005  | 0.0317916 | chr2:088777 | 0.0317916 |
| GPR61       | 1306 chr1  | 109878906 | 109889844 | 0.0318708 | chr1:109879 | 0.0318708 |
| CYP26C1     | 1308 chr10 | 94809646  | 94818306  | 0.0318809 | chr10:09481 | 0.0318809 |
| GPAA1       | 1311 chr8  | 145207543 | 145212066 | 0.0318913 | chr8:145207 | 0.0318913 |
| ZMYND19     | 1317 chr9  | 139596445 | 139607260 | 0.0319382 | chr9:139607 | 0.0319382 |
| ZNF131      | 1318 chr5  | 43156625  | 43164222  | 0.0319396 | chr5:043156 | 0.0319396 |
| SATB2-FLJ1  | 1327 chr2  | 200033461 | 200042755 | 0.0320406 | chr2:200033 | 0.0320406 |
| PXK         | 1330 chr3  | 58288439  | 58296249  | 0.032046  | chr3:058289 | 0.032046  |
| MAFB        | 1332 chr20 | 38748420  | 38756778  | 0.0320533 | chr20:03874 | 0.0320533 |
| ZNF770      | 1336 chr15 | 33065756  | 33072832  | 0.0320718 | chr15:03306 | 0.0320718 |
| DHRS3       | 1337 chr1  | 12597570  | 12605805  | 0.0320749 | chr1:012602 | 0.0320749 |
| SPIN1       | 1339 chr9  | 28888252  | 90195641  | 0.0320861 | chr9:090192 | 0.0320861 |
| FRMD1       | 1341 chr6  | 168220350 | 168228094 | 0.0320951 | chr6:168226 | 0.0320951 |
| LOC553158   | 1342 chr22 | 43479214  | 43489065  | 0.0320971 | chr22:04348 | 0.0320971 |
| FTSJ1       | 1344 chrX  | 48219495  | 48222743  | 0.0321132 | chrX:048219 | 0.0321132 |
| ARID1B      | 1345 chr6  | 157135589 | 157143285 | 0.0321135 | chr6:157140 | 0.0321135 |
| EIF2B5      | 1347 chr3  | 185330346 | 185338272 | 0.0321313 | chr3:185333 | 0.0321313 |
| hsa-mir-200 | 1348 chr1  | 1086861   | 1092425   | 0.0321339 | chr1:001090 | 0.0321339 |
| SUPT7L      | 1349 chr2  | 27740080  | 27745509  | 0.0321351 | chr2:027740 | 0.0321351 |
| PAFAH1B3    | 1352 chr19 | 47498103  | 47506821  | 0.032149  | chr19:04749 | 0.032149  |
| SNX5-C20c   | 1355 chr20 | 17897498  | 17897762  | 0.0321753 | chr20:01789 | 0.0321753 |
| PPP2R2C     | 1359 chr4  | 6432166   | 6528433   | 0.0322062 | chr4:006521 | 0.0322062 |
| RCL1        | 1360 chr9  | 4781986   | 4842459   | 0.0322077 | chr9:004782 | 0.0322077 |
| PROX1       | 1364 chr1  | 212223028 | 212230969 | 0.03222   | chr1:212222 | 0.03222   |
| TP53INP1    | 1366 chr8  | 96020696  | 96035461  | 0.0322271 | chr8:096030 | 0.0322271 |
| hsa-mir-589 | 1368 chr7  | 5505268   | 5511950   | 0.032254  | chr7:005507 | 0.032254  |
| INPP5B      | 1376 chr1  | 38183852  | 38190759  | 0.0323427 | chr1:038183 | 0.0323427 |
| U84         | 1377 chr6  | 31617054  | 31618188  | 0.0323433 | chr6:031617 | 0.0323433 |
| GPR78       | 1384 chr4  | 8627903   | 8640317   | 0.032411  | chr4:008628 | 0.032411  |
| WNT2B       | 1387 chr1  | 112805250 | 112855909 | 0.0324187 | chr1:112851 | 0.0324187 |
| GATA4       | 1390 chr8  | 11593734  | 11654701  | 0.0324453 | chr8:011597 | 0.0324453 |
| PERQ1       | 1391 chr7  | 100121151 | 100129576 | 0.0324501 | chr7:100121 | 0.0324501 |
| COX18       | 1398 chr4  | 74151828  | 74159766  | 0.0324832 | chr4:074154 | 0.0324832 |
| RUVBL1      | 1402 chr3  | 129323773 | 129330694 | 0.0325023 | chr3:129323 | 0.0325023 |

|             |      |       |           |           |           |                 |           |
|-------------|------|-------|-----------|-----------|-----------|-----------------|-----------|
| SCGB3A1     | 1403 | chr5  | 179949049 | 179956599 | 0.0325127 | chr5:179956599  | 0.0325127 |
| CUL3        | 1404 | chr2  | 225155445 | 225163714 | 0.0325252 | chr2:225163714  | 0.0325252 |
| C9orf24     | 1418 | chr9  | 34369086  | 34387891  | 0.0325961 | chr9:34387891   | 0.0325961 |
| ARPP-21     | 1422 | chr3  | 35652250  | 35763498  | 0.0326137 | chr3:35652250   | 0.0326137 |
| SFTPG       | 1423 | chr6  | 31005808  | 31013341  | 0.0326334 | chr6:31005808   | 0.0326334 |
| FLJ35779    | 1425 | chr5  | 75041738  | 75049395  | 0.0326446 | chr5:75041738   | 0.0326446 |
| IFT172      | 1430 | chr2  | 27564277  | 27568202  | 0.0326704 | chr2:27564277   | 0.0326704 |
| BMPER       | 1431 | chr7  | 33906200  | 33914077  | 0.0326741 | chr7:33906200   | 0.0326741 |
| SNTG2       | 1433 | chr2  | 932552    | 939022    | 0.0327005 | chr2:932552     | 0.0327005 |
| EPB49       | 1436 | chr8  | 21962957  | 21973772  | 0.0327147 | chr8:21962957   | 0.0327147 |
| hsa-mir-375 | 1439 | chr2  | 219574592 | 219575842 | 0.0327383 | chr2:219574592  | 0.0327383 |
| FOXO3A      | 1440 | chr6  | 108982322 | 108991575 | 0.0327451 | chr6:108982322  | 0.0327451 |
| ZMYM3       | 1442 | chrX  | 70387503  | 70396573  | 0.0327647 | chrX:70387503   | 0.0327647 |
| PTF1A       | 1451 | chr10 | 23516176  | 23523902  | 0.0328502 | chr10:23516176  | 0.0328502 |
| GABRD       | 1456 | chr1  | 1935804   | 1943242   | 0.0328857 | chr1:1935804    | 0.0328857 |
| MYL7        | 1468 | chr7  | 44144959  | 44150350  | 0.0330074 | chr7:44144959   | 0.0330074 |
| hsa-mir-374 | 1470 | chrX  | 73423869  | 73429361  | 0.0330265 | chrX:73423869   | 0.0330265 |
| FLJ38973    | 1471 | chr2  | 200480549 | 200486792 | 0.0330303 | chr2:200480549  | 0.0330303 |
| CACYBP      | 1472 | chr1  | 173229728 | 173238408 | 0.0330322 | chr1:173229728  | 0.0330322 |
| IL1RN       | 1478 | chr2  | 113586513 | 113604114 | 0.0330827 | chr2:113586513  | 0.0330827 |
| AVPR2       | 1479 | chrX  | 152819562 | 152825728 | 0.0330848 | chrX:152819562  | 0.0330848 |
| ARRDC3      | 1481 | chr5  | 90712611  | 90719796  | 0.0330935 | chr5:90712611   | 0.0330935 |
| GPR158      | 1482 | chr10 | 25499165  | 25506484  | 0.0331047 | chr10:25499165  | 0.0331047 |
| IL1RAP      | 1488 | chr3  | 191709512 | 191717008 | 0.0331451 | chr3:191709512  | 0.0331451 |
| FLJ32011    | 1489 | chr1  | 46785890  | 46793746  | 0.0331571 | chr1:46785890   | 0.0331571 |
| SEMA3F      | 1490 | chr3  | 50162350  | 50201529  | 0.0331681 | chr3:50162350   | 0.0331681 |
| TBX3        | 1491 | chr12 | 113602951 | 113611820 | 0.0331748 | chr12:113602951 | 0.0331748 |
| COMP        | 1492 | chr19 | 18760682  | 18768472  | 0.0331835 | chr19:18760682  | 0.0331835 |
| PNOC        | 1495 | chr8  | 28225176  | 28233227  | 0.033209  | chr8:28225176   | 0.033209  |
| GRAMD1A     | 1498 | chr19 | 40177617  | 40209191  | 0.0332285 | chr19:40177617  | 0.0332285 |
| ENTPD3      | 1499 | chr3  | 40398334  | 40406401  | 0.033238  | chr3:40398334   | 0.033238  |
| ASS1        | 1500 | chr9  | 132305079 | 132312649 | 0.0332491 | chr9:132305079  | 0.0332491 |
| TTC27       | 1501 | chr2  | 32701270  | 32709066  | 0.0332509 | chr2:32701270   | 0.0332509 |
| GLRX        | 1502 | chr5  | 95182809  | 95189649  | 0.0332546 | chr5:95182809   | 0.0332546 |
| LYSMD3      | 1504 | chr5  | 89858662  | 89866678  | 0.0332637 | chr5:89858662   | 0.0332637 |
| DDX4        | 1513 | chr5  | 55064097  | 55073014  | 0.0333778 | chr5:55064097   | 0.0333778 |
| DPH5        | 1515 | chr1  | 101261670 | 101269160 | 0.0333998 | chr1:101261670  | 0.0333998 |
| GABBR1      | 1518 | chr6  | 29701294  | 29714320  | 0.0334071 | chr6:29701294   | 0.0334071 |
| C6orf208    | 1519 | chr6  | 169926857 | 169946243 | 0.0334138 | chr6:169926857  | 0.0334138 |
| NUDT2       | 1523 | chr9  | 34314130  | 34331459  | 0.0334446 | chr9:34314130   | 0.0334446 |
| C1orf109-C  | 1525 | chr1  | 37928846  | 37930766  | 0.0334623 | chr1:37928846   | 0.0334623 |
| STAG2       | 1527 | chrX  | 122919322 | 122986516 | 0.0334702 | chrX:122919322  | 0.0334702 |
| CCDC19      | 1531 | chr1  | 158134110 | 158138005 | 0.0334974 | chr1:158134110  | 0.0334974 |
| C6orf15-PS  | 1532 | chr6  | 31188399  | 31190561  | 0.0334976 | chr6:31188399   | 0.0334976 |
| SLC6A5      | 1534 | chr11 | 20572145  | 20580290  | 0.0335235 | chr11:20572145  | 0.0335235 |
| FAM119A     | 1535 | chr2  | 208194873 | 208203795 | 0.0335324 | chr2:208194873  | 0.0335324 |
| ZIC5-ZIC2   | 1536 | chr13 | 99422388  | 99431823  | 0.0335342 | chr13:99422388  | 0.0335342 |
| MAOA        | 1538 | chrX  | 43394882  | 43402960  | 0.033538  | chrX:43394882   | 0.033538  |
| NCSTN       | 1542 | chr1  | 158574601 | 158580056 | 0.0335676 | chr1:158574601  | 0.0335676 |
| NRG1        | 1547 | chr8  | 31611570  | 32627280  | 0.033586  | chr8:31611570   | 0.033586  |
| DOK6        | 1551 | chr18 | 65215970  | 65221766  | 0.033602  | chr18:65215970  | 0.033602  |
| CTSL2       | 1553 | chr9  | 98837767  | 98846906  | 0.0336269 | chr9:98837767   | 0.0336269 |
| MAP3K5      | 1556 | chr6  | 137153022 | 137158517 | 0.0336382 | chr6:137153022  | 0.0336382 |
| PLXNB1      | 1558 | chr3  | 48438556  | 48447225  | 0.0336478 | chr3:48438556   | 0.0336478 |
| PAXIP1      | 1561 | chr7  | 154423186 | 154430609 | 0.0336749 | chr7:154423186  | 0.0336749 |
| PGM2L1      | 1563 | chr11 | 73784525  | 73792569  | 0.0336786 | chr11:73784525  | 0.0336786 |
| NFKB1       | 1569 | chr4  | 103636135 | 103643998 | 0.0337283 | chr4:103636135  | 0.0337283 |
| CNKSR1      | 1575 | chr1  | 26370012  | 26388756  | 0.0337683 | chr1:26370012   | 0.0337683 |

|             |            |           |           |           |             |           |
|-------------|------------|-----------|-----------|-----------|-------------|-----------|
| B3GALNT2    | 1576 chr1  | 233731759 | 233739802 | 0.0337697 | chr1:233734 | 0.0337697 |
| SLC26A6     | 1579 chr3  | 48638187  | 48648804  | 0.0337883 | chr3:048648 | 0.0337883 |
| RGAG4-LO    | 1581 chrX  | 71268532  | 71270050  | 0.033794  | chrX:071268 | 0.033794  |
| ADRM1       | 1585 chr20 | 60306020  | 60314495  | 0.0338377 | chr20:06030 | 0.0338377 |
| PDLIM4      | 1591 chr5  | 131615815 | 131623830 | 0.0338585 | chr5:131620 | 0.0338585 |
| IFNA14      | 1593 chr9  | 21228619  | 21235231  | 0.0338644 | chr9:021235 | 0.0338644 |
| PANK1       | 1606 chr10 | 91341069  | 91400453  | 0.033972  | chr10:09134 | 0.033972  |
| ZNF77       | 1613 chr19 | 2894223   | 2900639   | 0.0339997 | chr19:00289 | 0.0339997 |
| HEXA-C15c   | 1617 chr15 | 70455436  | 70455768  | 0.034018  | chr15:07045 | 0.034018  |
| HNRPH1      | 1618 chr5  | 178980375 | 178987910 | 0.0340183 | chr5:178980 | 0.0340183 |
| SLC35A2     | 1621 chrX  | 48645393  | 48655319  | 0.034024  | chrX:048655 | 0.034024  |
| AGPAT2      | 1623 chr9  | 138687250 | 138707169 | 0.0340309 | chr9:138707 | 0.0340309 |
| FLJ46831    | 1626 chr10 | 129422307 | 129429186 | 0.034033  | chr10:12942 | 0.034033  |
| KCNH2       | 1628 chr7  | 150281082 | 150309014 | 0.034046  | chr7:150281 | 0.034046  |
| THRAP6      | 1631 chr8  | 118600735 | 118604599 | 0.0340615 | chr8:118600 | 0.0340615 |
| CDC2L6      | 1632 chr6  | 111240626 | 111245215 | 0.0340821 | chr6:111243 | 0.0340821 |
| EFNA4       | 1634 chr1  | 153302061 | 153305367 | 0.0340917 | chr1:153302 | 0.0340917 |
| ARTN        | 1648 chr1  | 44169426  | 44175206  | 0.0342053 | chr1:044175 | 0.0342053 |
| METRNL      | 1650 chr17 | 78625343  | 78633261  | 0.0342106 | chr17:07862 | 0.0342106 |
| GABRE       | 1654 chrX  | 150875275 | 150898726 | 0.0342325 | chrX:150898 | 0.0342325 |
| PH-4        | 1657 chr3  | 48998040  | 49019547  | 0.034248  | chr3:049002 | 0.034248  |
| CHMP2B      | 1659 chr3  | 87353793  | 87361830  | 0.0342555 | chr3:087355 | 0.0342555 |
| BICD1       | 1660 chr12 | 32148701  | 32153940  | 0.0342566 | chr12:03214 | 0.0342566 |
| WDR90       | 1665 chr16 | 638454    | 657842    | 0.0342749 | chr16:00063 | 0.0342749 |
| TBX4        | 1666 chr17 | 56883121  | 56891144  | 0.0342767 | chr17:05688 | 0.0342767 |
| KIAA0895    | 1667 chr7  | 36370564  | 36378759  | 0.0342778 | chr7:036370 | 0.0342778 |
| SUSD3       | 1675 chr9  | 94855525  | 94863269  | 0.0343081 | chr9:094855 | 0.0343081 |
| EBF3        | 1677 chr10 | 131649747 | 131657923 | 0.0343379 | chr10:13164 | 0.0343379 |
| RNF182      | 1678 chr6  | 14027774  | 14035876  | 0.0343387 | chr6:014035 | 0.0343387 |
| hsa-mir-23b | 1683 chr9  | 96881865  | 96887387  | 0.0343624 | chr9:096888 | 0.0343624 |
| HIF3A       | 1688 chr19 | 51486674  | 51538521  | 0.0343733 | chr19:05148 | 0.0343733 |
| ZNF79       | 1689 chr9  | 129220985 | 129248408 | 0.0343756 | chr9:129220 | 0.0343756 |
| FLJ41993    | 1691 chr22 | 48790740  | 48795589  | 0.0343806 | chr22:04879 | 0.0343806 |
| INHBE       | 1692 chr12 | 56131266  | 56137455  | 0.0343818 | chr12:05613 | 0.0343818 |
| SRRM1       | 1700 chr1  | 24837085  | 24844901  | 0.0344628 | chr1:024844 | 0.0344628 |
| MKX         | 1701 chr10 | 28072321  | 28079726  | 0.0344642 | chr10:02807 | 0.0344642 |
| UBE3A       | 1706 chr15 | 23202679  | 23240263  | 0.0345057 | chr15:02320 | 0.0345057 |
| GPR148      | 1710 chr2  | 131197798 | 131204899 | 0.0345323 | chr2:131200 | 0.0345323 |
| TNNT3       | 1716 chr11 | 1895333   | 1903107   | 0.0345464 | chr11:00189 | 0.0345464 |
| POLM        | 1724 chr7  | 44086190  | 44094135  | 0.0345646 | chr7:044090 | 0.0345646 |
| LOC91461    | 1730 chr2  | 42123941  | 42131724  | 0.0346116 | chr2:042123 | 0.0346116 |
| LCE1D       | 1744 chr1  | 151027705 | 151036773 | 0.0347051 | chr1:151036 | 0.0347051 |
| SEC22C-SC   | 1746 chr3  | 42598594  | 42607292  | 0.0347198 | chr3:042598 | 0.0347198 |
| TMED7       | 1755 chr5  | 114987087 | 114989633 | 0.0347791 | chr5:114989 | 0.0347791 |
| RTKN        | 1757 chr2  | 74517947  | 74525617  | 0.0347811 | chr2:074525 | 0.0347811 |
| PQBP1       | 1759 chrX  | 48635654  | 48645205  | 0.034799  | chrX:048635 | 0.034799  |
| ACA55       | 1760 chr1  | 39811697  | 39814998  | 0.0348    | chr1:039814 | 0.0348    |
| ZZEF1-CYE   | 1763 chr17 | 3993175   | 3993223   | 0.0348277 | chr17:00399 | 0.0348277 |
| FAM92B      | 1764 chr16 | 83701015  | 83709037  | 0.0348286 | chr16:08370 | 0.0348286 |
| ARL6IP2     | 1769 chr2  | 38455625  | 38462393  | 0.0348702 | chr2:038455 | 0.0348702 |
| FLJ32549    | 1780 chr12 | 62900087  | 62904859  | 0.034948  | chr12:06290 | 0.034948  |
| C7orf47     | 1781 chr7  | 99870374  | 99877531  | 0.0349541 | chr7:099870 | 0.0349541 |
| EPPB9       | 1785 chr17 | 19203981  | 19210715  | 0.034973  | chr17:01920 | 0.034973  |
| PNPO        | 1788 chr17 | 43368599  | 43376359  | 0.0349893 | chr17:04336 | 0.0349893 |
| SOX14       | 1799 chr3  | 138961192 | 138968748 | 0.035071  | chr3:138966 | 0.035071  |
| KTI12       | 1802 chr1  | 52270213  | 52274115  | 0.0350839 | chr1:052270 | 0.0350839 |
| FBXO30      | 1812 chr6  | 146175187 | 146183081 | 0.0351258 | chr6:146175 | 0.0351258 |
| IHPK3       | 1816 chr6  | 33820354  | 33828117  | 0.0351603 | chr6:033820 | 0.0351603 |

|            |            |           |           |           |             |           |
|------------|------------|-----------|-----------|-----------|-------------|-----------|
| PRR16      | 1827 chr5  | 119822888 | 119847289 | 0.0351987 | chr5:119827 | 0.0351987 |
| ERCC1      | 1828 chr19 | 50616065  | 50624236  | 0.0352167 | chr19:0506  | 0.0352167 |
| XKRX       | 1830 chrX  | 100068146 | 100075381 | 0.0352256 | chrX:10007  | 0.0352256 |
| ABCG5-AB   | 1831 chr2  | 43919523  | 43919567  | 0.0352388 | chr2:04391  | 0.0352388 |
| FOXA1      | 1839 chr14 | 37131572  | 37139690  | 0.035272  | chr14:0371  | 0.035272  |
| IKZF3-ZPBI | 1842 chr17 | 35274022  | 35278000  | 0.035279  | chr17:0352  | 0.035279  |
| FGF10      | 1843 chr5  | 44422143  | 44429997  | 0.0352796 | chr5:04442  | 0.0352796 |
| MAP3K11    | 1847 chr11 | 65121781  | 65143803  | 0.0352855 | chr11:0651  | 0.0352855 |
| HOXC9      | 1849 chr12 | 52672030  | 52682719  | 0.0352918 | chr12:0526  | 0.0352918 |
| TTK        | 1850 chr6  | 80767736  | 80773547  | 0.0352922 | chr6:08077  | 0.0352922 |
| STK40      | 1851 chr1  | 36597082  | 36629512  | 0.0352956 | chr1:03662  | 0.0352956 |
| BICD2      | 1857 chr9  | 94564740  | 94569870  | 0.0353345 | chr9:09456  | 0.0353345 |
| DBH        | 1860 chr9  | 135486146 | 135493865 | 0.0353542 | chr9:13548  | 0.0353542 |
| ZZZ3       | 1861 chr1  | 77873739  | 77926545  | 0.0353584 | chr1:07792  | 0.0353584 |
| TARDBP     | 1862 chr1  | 10992028  | 10997267  | 0.0353656 | chr1:01099  | 0.0353656 |
| KIF7       | 1868 chr15 | 87990097  | 87997586  | 0.0354044 | chr15:0879  | 0.0354044 |
| SLC35E4    | 1876 chr22 | 29356327  | 29363855  | 0.035461  | chr22:0293  | 0.035461  |
| SARDH      | 1883 chr9  | 135586839 | 135598168 | 0.0355112 | chr9:13559  | 0.0355112 |
| KRIT1      | 1893 chr7  | 91706862  | 91718749  | 0.0355481 | chr7:09171  | 0.0355481 |
| MPPED2     | 1899 chr11 | 30556225  | 30568471  | 0.035573  | chr11:0305  | 0.035573  |
| TBC1D5     | 1901 chr3  | 17755174  | 17762840  | 0.035576  | chr3:01775  | 0.035576  |
| MRPL24     | 1910 chr1  | 154975017 | 154978481 | 0.0356332 | chr1:15497  | 0.0356332 |
| U82        | 1915 chr2  | 232034951 | 232037469 | 0.0356706 | chr2:23203  | 0.0356706 |
| LCORL      | 1916 chr4  | 17630174  | 17637977  | 0.0356744 | chr4:01763  | 0.0356744 |
| TMEM28     | 1924 chrX  | 68636311  | 68644279  | 0.0357064 | chrX:06864  | 0.0357064 |
| AMIGO2     | 1928 chr12 | 45756525  | 45765530  | 0.0357273 | chr12:0457  | 0.0357273 |
| FGF9       | 1930 chr13 | 21139810  | 21146427  | 0.0357369 | chr13:0211  | 0.0357369 |
| U61        | 1933 chrX  | 135789242 | 135790581 | 0.0357539 | chrX:13579  | 0.0357539 |
| PDE2A      | 1938 chr11 | 72001909  | 72068632  | 0.035828  | chr11:0720  | 0.035828  |
| XPR1       | 1940 chr1  | 178862579 | 178870366 | 0.0358387 | chr1:17886  | 0.0358387 |
| RPL38      | 1943 chr17 | 69705900  | 69717620  | 0.0358445 | chr17:0697  | 0.0358445 |
| SLC16A8    | 1945 chr22 | 36806544  | 36810795  | 0.035854  | chr22:0368  | 0.035854  |
| MFI2       | 1946 chr3  | 198238571 | 198246499 | 0.0358653 | chr3:19824  | 0.0358653 |
| PDF        | 1948 chr16 | 67919667  | 67930834  | 0.0359016 | chr16:0679  | 0.0359016 |
| LCK        | 1949 chr1  | 32488079  | 32515009  | 0.0359028 | chr1:03248  | 0.0359028 |
| C9orf106   | 1954 chr9  | 131117670 | 131125354 | 0.0359338 | chr9:13112  | 0.0359338 |
| SEMA6C-TI  | 1958 chr1  | 149385840 | 149395642 | 0.0359667 | chr1:14938  | 0.0359667 |
| WDR5       | 1960 chr9  | 135985825 | 135997279 | 0.0359959 | chr9:13599  | 0.0359959 |
| ALG2-SEC   | 1961 chr9  | 101024146 | 101024313 | 0.0360036 | chr9:10102  | 0.0360036 |
| AEBP1      | 1963 chr7  | 44104962  | 44113145  | 0.0360101 | chr7:04410  | 0.0360101 |
| HSPC268    | 1966 chr7  | 138676434 | 138678601 | 0.0360184 | chr7:13867  | 0.0360184 |
| ENTPD2     | 1968 chr9  | 139062363 | 139072162 | 0.0360233 | chr9:13906  | 0.0360233 |
| TMED4      | 1972 chr7  | 44585279  | 44592902  | 0.0360594 | chr7:04458  | 0.0360594 |
| UNC5A      | 1976 chr5  | 176166714 | 176172576 | 0.0360756 | chr5:17616  | 0.0360756 |
| CDH11      | 1979 chr16 | 63593812  | 63718720  | 0.0360987 | chr16:0637  | 0.0360987 |
| ABCB6      | 1983 chr2  | 219789358 | 219792281 | 0.0361015 | chr2:21979  | 0.0361015 |
| UCHL5IP    | 1986 chrX  | 152386759 | 152394392 | 0.0361204 | chrX:15239  | 0.0361204 |
| CCL27      | 1992 chr9  | 34651871  | 34658090  | 0.0361532 | chr9:03465  | 0.0361532 |
| CABC1      | 2006 chr1  | 225190261 | 225197126 | 0.0362553 | chr1:22519  | 0.0362553 |
| ZNF403     | 2011 chr17 | 31969582  | 32020341  | 0.0362739 | chr17:0319  | 0.0362739 |
| SDC1       | 2013 chr2  | 20285700  | 20293454  | 0.0362835 | chr2:02028  | 0.0362835 |
| PROC       | 2015 chr2  | 127889156 | 127894938 | 0.0362872 | chr2:12789  | 0.0362872 |
| SLBP       | 2016 chr4  | 1682969   | 1687473   | 0.0362916 | chr4:00168  | 0.0362916 |
| SFT2D3     | 2018 chr2  | 128169654 | 128177749 | 0.0363133 | chr2:12817  | 0.0363133 |
| FKBP14-PL  | 2027 chr7  | 30032790  | 30034727  | 0.0363681 | chr7:03003  | 0.0363681 |
| FLJ23834   | 2029 chr7  | 105385443 | 105393000 | 0.0363749 | chr7:10538  | 0.0363749 |
| C9orf4     | 2036 chr9  | 110967134 | 110974920 | 0.0364068 | chr9:11097  | 0.0364068 |
| BRSK2      | 2037 chr11 | 1362300   | 1370165   | 0.0364097 | chr11:0013  | 0.0364097 |

|             |            |           |           |           |             |           |
|-------------|------------|-----------|-----------|-----------|-------------|-----------|
| BAK1        | 2047 chr6  | 33651037  | 33661412  | 0.0364743 | chr6:033659 | 0.0364743 |
| SOS1        | 2055 chr2  | 39199050  | 39206066  | 0.0365154 | chr2:039204 | 0.0365154 |
| C1orf156-C  | 2065 chr1  | 168030655 | 168031143 | 0.0365594 | chr1:168030 | 0.0365594 |
| SKIP        | 2072 chr17 | 1344606   | 228755439 | 0.0365953 | chr17:00136 | 0.0365953 |
| ZAP70       | 2079 chr2  | 97691005  | 97709618  | 0.0366543 | chr2:097707 | 0.0366543 |
| CACNB3      | 2081 chr12 | 47493819  | 47500901  | 0.0366658 | chr12:04749 | 0.0366658 |
| UFD1L-CD    | 2089 chr22 | 17846749  | 17847434  | 0.0367015 | chr22:01784 | 0.0367015 |
| HYAL2       | 2091 chr3  | 50330500  | 50337319  | 0.0367097 | chr3:050334 | 0.0367097 |
| HBII-108    | 2092 chr3  | 52695042  | 52697644  | 0.0367117 | chr3:052695 | 0.0367117 |
| CRB2        | 2095 chr9  | 125153123 | 125160620 | 0.0367287 | chr9:125153 | 0.0367287 |
| SLC39A4     | 2097 chr8  | 145608664 | 145614809 | 0.036743  | chr8:145614 | 0.036743  |
| HAS1        | 2099 chr19 | 56918136  | 56923804  | 0.0367503 | chr19:05692 | 0.0367503 |
| DMKN        | 2101 chr19 | 40693768  | 40699794  | 0.0367593 | chr19:04069 | 0.0367593 |
| FBLIM1      | 2112 chr1  | 15952416  | 15966408  | 0.0368249 | chr1:015957 | 0.0368249 |
| IHPK1       | 2114 chr3  | 49736707  | 49804354  | 0.0368279 | chr3:049799 | 0.0368279 |
| BRD1        | 2119 chr22 | 48602388  | 48612800  | 0.0368453 | chr22:04860 | 0.0368453 |
| XPO6        | 2122 chr16 | 28129110  | 28135557  | 0.0368549 | chr16:02813 | 0.0368549 |
| VPS36-CKA   | 2123 chr13 | 51922781  | 51927572  | 0.0368591 | chr13:05192 | 0.0368591 |
| EBF1        | 2127 chr5  | 158456725 | 158464864 | 0.036879  | chr5:158467 | 0.036879  |
| NFKBIA      | 2128 chr14 | 34941215  | 34948891  | 0.0368886 | chr14:03494 | 0.0368886 |
| NEGR1       | 2130 chr1  | 72518377  | 72526370  | 0.036905  | chr1:072527 | 0.036905  |
| ACOX1       | 2142 chr17 | 71481389  | 71488504  | 0.036997  | chr17:07148 | 0.036997  |
| FLJ21839    | 2143 chr2  | 27122605  | 27130562  | 0.0370035 | chr2:027126 | 0.0370035 |
| CASP8       | 2146 chr2  | 201803472 | 201840886 | 0.0370197 | chr2:201803 | 0.0370197 |
| FOXD3       | 2149 chr1  | 63555964  | 63563692  | 0.0370295 | chr1:063556 | 0.0370295 |
| CACNG2      | 2150 chr22 | 35426134  | 35432824  | 0.0370352 | chr22:03542 | 0.0370352 |
| TRIM45      | 2153 chr1  | 117463345 | 117471266 | 0.0370468 | chr1:117466 | 0.0370468 |
| AQP1        | 2155 chr7  | 30912579  | 30920458  | 0.0370482 | chr7:030913 | 0.0370482 |
| KIAA1446    | 2164 chr14 | 100103426 | 100111302 | 0.03708   | chr14:10010 | 0.03708   |
| MAP6        | 2167 chr11 | 75054638  | 75060144  | 0.0370949 | chr11:07505 | 0.0370949 |
| MTHFSD      | 2173 chr16 | 85143815  | 85148458  | 0.0371413 | chr16:08514 | 0.0371413 |
| MIZF        | 2184 chr11 | 118493219 | 118499454 | 0.037195  | chr11:11849 | 0.037195  |
| ACSL6       | 2197 chr5  | 131372998 | 131380764 | 0.0372611 | chr5:131372 | 0.0372611 |
| CPEB4       | 2199 chr5  | 173243359 | 173255128 | 0.0372723 | chr5:173243 | 0.0372723 |
| BAT3-APOM   | 2201 chr6  | 31728497  | 31731567  | 0.0372753 | chr6:031728 | 0.0372753 |
| RSBN1L      | 2211 chr7  | 77159446  | 77166088  | 0.0373334 | chr7:077166 | 0.0373334 |
| CDC42EP2    | 2216 chr11 | 64834071  | 64846851  | 0.0373837 | chr11:06483 | 0.0373837 |
| SNCAIP      | 2229 chr5  | 121670574 | 121678315 | 0.0374287 | chr5:121670 | 0.0374287 |
| XRCC5       | 2239 chr2  | 216676979 | 216683912 | 0.0374762 | chr2:216668 | 0.0374762 |
| CYTL1       | 2242 chr4  | 5069675   | 5077229   | 0.0374823 | chr4:005072 | 0.0374823 |
| CLK3        | 2257 chr15 | 72682407  | 72697740  | 0.0375696 | chr15:07268 | 0.0375696 |
| NR5A1       | 2259 chr9  | 126307114 | 126314999 | 0.037577  | chr9:126310 | 0.037577  |
| WNK1        | 2260 chr12 | 729075    | 735519    | 0.0375778 | chr12:00073 | 0.0375778 |
| DEADC1-PI   | 2263 chr6  | 143813576 | 143813764 | 0.0376004 | chr6:143813 | 0.0376004 |
| BACH2       | 2265 chr6  | 91060808  | 91068712  | 0.0376046 | chr6:091060 | 0.0376046 |
| ATP8B2      | 2271 chr1  | 152564400 | 152570395 | 0.0376257 | chr1:152564 | 0.0376257 |
| KCNQ4       | 2281 chr1  | 41016955  | 41024847  | 0.0376896 | chr1:041017 | 0.0376896 |
| PRLH        | 2288 chr2  | 238134584 | 238142021 | 0.0377195 | chr2:238133 | 0.0377195 |
| DKFZP434E   | 2291 chr7  | 97717226  | 97724320  | 0.037736  | chr7:097719 | 0.037736  |
| hsa-mir-200 | 2293 chr12 | 6941254   | 6943172   | 0.0377427 | chr12:00694 | 0.0377427 |
| RAB33B      | 2295 chr4  | 140590533 | 140597269 | 0.0377533 | chr4:140594 | 0.0377533 |
| ERCC6       | 2298 chr10 | 50414818  | 50421257  | 0.0377775 | chr10:05041 | 0.0377775 |
| HOXC12      | 2301 chr12 | 52629619  | 52637412  | 0.0377953 | chr12:05262 | 0.0377953 |
| SLC34A2     | 2302 chr4  | 25262173  | 25268492  | 0.0377959 | chr4:025262 | 0.0377959 |
| RBM35B-LY   | 2304 chr16 | 66827645  | 66836694  | 0.0377971 | chr16:06682 | 0.0377971 |
| CD300LG     | 2307 chr17 | 39275146  | 39282481  | 0.037803  | chr17:03927 | 0.037803  |
| ACTG1       | 2330 chr17 | 77091566  | 77099924  | 0.0379155 | chr17:07709 | 0.0379155 |
| AFF2        | 2333 chrX  | 147384489 | 147392747 | 0.0379364 | chrX:147387 | 0.0379364 |

|             |            |           |           |           |             |           |
|-------------|------------|-----------|-----------|-----------|-------------|-----------|
| SERAC1-G    | 2341 chr6  | 158509323 | 158511498 | 0.0379817 | chr6:158509 | 0.0379817 |
| ARHGEF2     | 2343 chr1  | 154212204 | 154220445 | 0.037984  | chr1:154212 | 0.037984  |
| WDR45       | 2352 chrX  | 48819479  | 48849636  | 0.038007  | chrX:04882  | 0.038007  |
| H1FX-C3orf  | 2354 chr3  | 130517842 | 130519667 | 0.0380117 | chr3:13051  | 0.0380117 |
| HMX2        | 2358 chr10 | 124892389 | 124900106 | 0.0380316 | chr10:1248  | 0.0380316 |
| TCIRG1      | 2360 chr11 | 67560760  | 67565506  | 0.038039  | chr11:0675  | 0.038039  |
| HOXD3       | 2371 chr2  | 176727043 | 176744441 | 0.038092  | chr2:17673  | 0.038092  |
| RAG1AP1     | 2377 chr1  | 153374071 | 153378150 | 0.0381066 | chr1:15337  | 0.0381066 |
| FAM19A4     | 2380 chr3  | 69062038  | 69069515  | 0.0381237 | chr3:06906  | 0.0381237 |
| hsa-mir-218 | 2382 chr5  | 168125318 | 168133304 | 0.0381382 | chr5:16813  | 0.0381382 |
| EVX2-HOXI   | 2383 chr2  | 176660654 | 176665530 | 0.0381394 | chr2:17666  | 0.0381394 |
| GTF3C2      | 2388 chr2  | 27402507  | 27435035  | 0.0381545 | chr2:02743  | 0.0381545 |
| RPS13       | 2389 chr11 | 17055785  | 17059389  | 0.0381616 | chr11:0170  | 0.0381616 |
| FAM120C     | 2392 chrX  | 54224052  | 54231799  | 0.0381835 | chrX:05422  | 0.0381835 |
| MCM7-AP4    | 2397 chr7  | 99536336  | 99537032  | 0.0382197 | chr7:09953  | 0.0382197 |
| C6orf62     | 2407 chr6  | 24824580  | 24832907  | 0.0382452 | chr6:02482  | 0.0382452 |
| LOC340602   | 2419 chrX  | 51161816  | 51169018  | 0.0383202 | chrX:05116  | 0.0383202 |
| ZH2C2-HIS   | 2421 chr5  | 102483789 | 102492875 | 0.0383359 | chr5:10248  | 0.0383359 |
| TCEA2       | 2424 chr20 | 62159074  | 62170797  | 0.0383544 | chr20:0621  | 0.0383544 |
| VCP         | 2425 chr9  | 35060027  | 35063676  | 0.0383686 | chr9:03506  | 0.0383686 |
| TEAD3       | 2430 chr6  | 35570355  | 35573651  | 0.0383977 | chr6:03557  | 0.0383977 |
| NDRG4       | 2431 chr16 | 57049964  | 57104964  | 0.0383996 | chr16:0570  | 0.0383996 |
| RIPK5       | 2441 chr1  | 203444848 | 203451883 | 0.0384625 | chr1:20344  | 0.0384625 |
| NUCKS1      | 2452 chr1  | 203983296 | 203991055 | 0.0385189 | chr1:20398  | 0.0385189 |
| G3BP1       | 2453 chr5  | 151128697 | 151134202 | 0.0385272 | chr5:15113  | 0.0385272 |
| AXIIR       | 2460 chr5  | 43072837  | 43081243  | 0.038557  | chr5:04307  | 0.038557  |
| RIC8B       | 2472 chr12 | 105687190 | 105694723 | 0.0386549 | chr12:1056  | 0.0386549 |
| C4orf15     | 2474 chr4  | 2200333   | 2218985   | 0.0386643 | chr4:00221  | 0.0386643 |
| BARHL1      | 2477 chr9  | 134442307 | 134450406 | 0.0386711 | chr9:13444  | 0.0386711 |
| IGF2BP3     | 2480 chr7  | 23473818  | 23481990  | 0.0386836 | chr7:02347  | 0.0386836 |
| DGCR2       | 2484 chr22 | 17487418  | 17497679  | 0.0387052 | chr22:0174  | 0.0387052 |
| PEX1-DKF2   | 2486 chr7  | 91995822  | 91996023  | 0.0387065 | chr7:09199  | 0.0387065 |
| C9orf93     | 2487 chr9  | 15538929  | 15545425  | 0.0387076 | chr9:01554  | 0.0387076 |
| UNQ5830     | 2488 chr2  | 10061189  | 10068048  | 0.0387078 | chr2:01006  | 0.0387078 |
| TRERF1      | 2489 chr6  | 42524782  | 42532820  | 0.0387084 | chr6:04252  | 0.0387084 |
| MCM7        | 2492 chr7  | 99528068  | 99542545  | 0.038728  | chr7:09954  | 0.038728  |
| EIF3S7      | 2495 chr22 | 35236853  | 35260456  | 0.0387415 | chr22:0352  | 0.0387415 |
| FLJ37440    | 2497 chr2  | 112608311 | 112615167 | 0.0387452 | chr2:11261  | 0.0387452 |
| LY6D        | 2499 chr8  | 143863302 | 143869863 | 0.0387562 | chr8:14386  | 0.0387562 |
| TSPAN18     | 2510 chr11 | 44833211  | 44886572  | 0.0388009 | chr11:0448  | 0.0388009 |
| GNB1        | 2513 chr1  | 1744644   | 1817599   | 0.0388248 | chr1:00181  | 0.0388248 |
| FLJ44861    | 2520 chr17 | 76748398  | 76756425  | 0.0388463 | chr17:0767  | 0.0388463 |
| TRIM17      | 2522 chr1  | 226662339 | 226679173 | 0.0388498 | chr1:22667  | 0.0388498 |
| VIPR1       | 2530 chr3  | 42513623  | 42521665  | 0.0388858 | chr3:04251  | 0.0388858 |
| CHST12      | 2537 chr7  | 2404707   | 2440621   | 0.0389153 | chr7:00240  | 0.0389153 |
| HTATSF1     | 2540 chrX  | 135402324 | 135409951 | 0.0389264 | chrX:13540  | 0.0389264 |
| APRIN       | 2544 chr13 | 32053125  | 32061168  | 0.0389437 | chr13:0320  | 0.0389437 |
| VPS13B      | 2554 chr8  | 100090481 | 100096515 | 0.0390213 | chr8:10009  | 0.0390213 |
| MEF2D       | 2569 chr1  | 154717364 | 154742398 | 0.0391173 | chr1:15474  | 0.0391173 |
| ING1        | 2579 chr13 | 110163088 | 110167820 | 0.0391422 | chr13:1101  | 0.0391422 |
| SIM2        | 2581 chr21 | 36988609  | 36996338  | 0.0391498 | chr21:0369  | 0.0391498 |
| SERPINE1    | 2588 chr7  | 100551960 | 100558898 | 0.0391899 | chr7:10055  | 0.0391899 |
| RNASEL      | 2589 chr1  | 180820251 | 180826183 | 0.039195  | chr1:18082  | 0.039195  |
| CAPNS1      | 2601 chr19 | 41317575  | 41333306  | 0.0392919 | chr19:0413  | 0.0392919 |
| hsa-mir-143 | 2614 chr5  | 148783524 | 148788778 | 0.0393887 | chr5:14878  | 0.0393887 |
| MMP2        | 2615 chr16 | 54066858  | 54097894  | 0.039391  | chr16:0540  | 0.039391  |
| LEMD3       | 2617 chr12 | 63844628  | 63851990  | 0.0393997 | chr12:0638  | 0.0393997 |
| RPL39       | 2624 chrX  | 118809631 | 118814475 | 0.039468  | chrX:11880  | 0.039468  |

|             |      |       |           |           |           |             |           |
|-------------|------|-------|-----------|-----------|-----------|-------------|-----------|
| PRDM14      | 2626 | chr8  | 71143915  | 71151411  | 0.0394996 | chr8:071146 | 0.0394996 |
| PIGM        | 2627 | chr1  | 158265744 | 158273878 | 0.0395018 | chr1:158268 | 0.0395018 |
| TSPYL1      | 2628 | chr6  | 116702581 | 116711998 | 0.0395041 | chr6:116707 | 0.0395041 |
| hsa-mir-202 | 2631 | chr10 | 134908604 | 134916177 | 0.0395139 | chr10:1349  | 0.0395139 |
| AARSD1-RI   | 2636 | chr17 | 38385681  | 38385847  | 0.0395285 | chr17:03838 | 0.0395285 |
| PDE11A      | 2641 | chr2  | 178196195 | 178681290 | 0.0395559 | chr2:178648 | 0.0395559 |
| KCNIP3      | 2643 | chr2  | 95321487  | 95329375  | 0.0395632 | chr2:095324 | 0.0395632 |
| PANK4       | 2645 | chr1  | 2445429   | 2449738   | 0.0395789 | chr1:002448 | 0.0395789 |
| RPS7        | 2646 | chr2  | 3595508   | 3603559   | 0.039581  | chr2:003600 | 0.039581  |
| SEMA4C      | 2648 | chr2  | 96889200  | 96904894  | 0.0395858 | chr2:096900 | 0.0395858 |
| LOC343521   | 2651 | chr1  | 45044406  | 45050610  | 0.0396164 | chr1:045048 | 0.0396164 |
| GAL3ST2     | 2652 | chr2  | 242359723 | 242366574 | 0.0396202 | chr2:24236  | 0.0396202 |
| TMEM130-1   | 2653 | chr7  | 98305761  | 98313939  | 0.0396246 | chr7:098311 | 0.0396246 |
| GPR68       | 2658 | chr14 | 90768674  | 90795188  | 0.0396462 | chr14:09079 | 0.0396462 |
| NVL         | 2662 | chr1  | 222583863 | 222589865 | 0.0396586 | chr1:222584 | 0.0396586 |
| CLDN15      | 2673 | chr7  | 100665187 | 100669457 | 0.0397135 | chr7:100666 | 0.0397135 |
| MCF2L2      | 2677 | chr3  | 184626030 | 184632972 | 0.0397235 | chr3:184628 | 0.0397235 |
| C2orf50     | 2683 | chr2  | 11186272  | 11194583  | 0.0397565 | chr2:011188 | 0.0397565 |
| U73b        | 2684 | chr4  | 152240306 | 152242121 | 0.0397583 | chr4:152240 | 0.0397583 |
| CASP9-DN1   | 2687 | chr1  | 15723798  | 15725873  | 0.0397686 | chr1:015728 | 0.0397686 |
| COG8-NIP7   | 2688 | chr16 | 67931010  | 67931060  | 0.0397709 | chr16:06793 | 0.0397709 |
| HSP90AB1    | 2693 | chr6  | 44318300  | 44324713  | 0.0398047 | chr6:044322 | 0.0398047 |
| FLJ45717    | 2697 | chr1  | 245341314 | 245345764 | 0.0398239 | chr1:245343 | 0.0398239 |
| hsa-mir-500 | 2703 | chrX  | 49655023  | 49659662  | 0.0398333 | chrX:049658 | 0.0398333 |
| G6PD        | 2709 | chrX  | 153420432 | 153428883 | 0.039853  | chrX:153421 | 0.039853  |
| CDKN2AIP    | 2721 | chr4  | 184597900 | 184605369 | 0.0399371 | chr4:184602 | 0.0399371 |
| CLU         | 2725 | chr8  | 27521826  | 27533337  | 0.0399465 | chr8:027528 | 0.0399465 |
| CAPN5       | 2732 | chr11 | 76451892  | 76494054  | 0.0399745 | chr11:07648 | 0.0399745 |
| SIN3A       | 2741 | chr15 | 73450398  | 73536494  | 0.0399997 | chr15:07353 | 0.0399997 |
| PRKCH       | 2746 | chr14 | 60852845  | 60860987  | 0.0400309 | chr14:06088 | 0.0400309 |
| ZNF307-C6   | 2748 | chr6  | 28327956  | 28334952  | 0.0400501 | chr6:028327 | 0.0400501 |
| MEIS2       | 2760 | chr15 | 35176397  | 35185975  | 0.0401169 | chr15:03518 | 0.0401169 |
| ALS2CR4     | 2762 | chr2  | 202193153 | 202217754 | 0.0401181 | chr2:202218 | 0.0401181 |
| TUBB2A      | 2764 | chr6  | 3101973   | 3108275   | 0.0401214 | chr6:003108 | 0.0401214 |
| GTF2I       | 2768 | chr7  | 73705451  | 73712425  | 0.0401371 | chr7:073708 | 0.0401371 |
| ICT1        | 2776 | chr17 | 70515625  | 70520950  | 0.0401699 | chr17:07052 | 0.0401699 |
| MAP4K3      | 2777 | chr2  | 39515698  | 39522515  | 0.0401702 | chr2:039518 | 0.0401702 |
| SYMPK-FO    | 2803 | chr19 | 51058452  | 51059331  | 0.0402954 | chr19:05108 | 0.0402954 |
| hsa-mir-185 | 2807 | chr22 | 18390728  | 18400575  | 0.0403128 | chr22:01840 | 0.0403128 |
| KIAA1622    | 2808 | chr14 | 93707623  | 93713050  | 0.0403202 | chr14:09371 | 0.0403202 |
| CRLF1-C19   | 2809 | chr19 | 18578809  | 18584682  | 0.0403235 | chr19:01857 | 0.0403235 |
| GK          | 2810 | chrX  | 30575887  | 30584025  | 0.0403259 | chrX:030588 | 0.0403259 |
| GPC3        | 2813 | chrX  | 132944673 | 132951433 | 0.0403553 | chrX:13294  | 0.0403553 |
| GLI4        | 2817 | chr8  | 144416419 | 144423363 | 0.0403785 | chr8:144416 | 0.0403785 |
| GRPEL2      | 2826 | chr5  | 148702330 | 148713142 | 0.0404287 | chr5:148708 | 0.0404287 |
| SMPD1       | 2827 | chr11 | 6362708   | 6370900   | 0.0404331 | chr11:00636 | 0.0404331 |
| SMARCD1     | 2835 | chr4  | 95342588  | 95350747  | 0.0404574 | chr4:095347 | 0.0404574 |
| ABL1        | 2837 | chr9  | 132574068 | 132703177 | 0.0404713 | chr9:132698 | 0.0404713 |
| ZNF260      | 2854 | chr19 | 41708611  | 41716300  | 0.0405784 | chr19:04171 | 0.0405784 |
| PRDM13      | 2871 | chr6  | 100156309 | 100164103 | 0.0406597 | chr6:100158 | 0.0406597 |
| ZFAND3      | 2873 | chr6  | 37890271  | 37898216  | 0.0406777 | chr6:037894 | 0.0406777 |
| COX7A2L     | 2876 | chr2  | 42439330  | 42446695  | 0.0406854 | chr2:042442 | 0.0406854 |
| CRABP1      | 2883 | chr15 | 76416097  | 76422261  | 0.0407295 | chr15:07641 | 0.0407295 |
| TLE3        | 2891 | chr15 | 68173699  | 68182765  | 0.0407709 | chr15:06817 | 0.0407709 |
| GNAL        | 2897 | chr18 | 11677388  | 11843760  | 0.0408039 | chr18:01167 | 0.0408039 |
| CCR7        | 2900 | chr17 | 35972703  | 35975405  | 0.0408138 | chr17:03597 | 0.0408138 |
| GPRC5B      | 2905 | chr16 | 19801180  | 19809142  | 0.0408558 | chr16:01980 | 0.0408558 |
| ADCY5       | 2914 | chr3  | 124648015 | 124655504 | 0.0409041 | chr3:124655 | 0.0409041 |



|            |            |           |           |           |             |           |
|------------|------------|-----------|-----------|-----------|-------------|-----------|
| CERK       | 2916 chr22 | 45510213  | 45517890  | 0.0409188 | chr22:0455  | 0.0409188 |
| MFSD2      | 2921 chr1  | 40192194  | 40196013  | 0.0409433 | chr1:04019  | 0.0409433 |
| LDB1       | 2929 chr10 | 103862209 | 103870215 | 0.0409759 | chr10:10386 | 0.0409759 |
| GLTSCR2    | 2940 chr19 | 52938374  | 52940631  | 0.0410312 | chr19:0529  | 0.0410312 |
| TBC1D23    | 2950 chr3  | 101457097 | 101463735 | 0.041067  | chr3:10146  | 0.041067  |
| MORF4L2    | 2952 chrX  | 102825764 | 102833759 | 0.0410746 | chrX:10282  | 0.0410746 |
| CEACAM4    | 2953 chr19 | 46823275  | 46830578  | 0.0410789 | chr19:0468  | 0.0410789 |
| CRKRS      | 2955 chr17 | 34871125  | 34874380  | 0.041083  | chr17:0348  | 0.041083  |
| VIL1       | 2960 chr2  | 218991401 | 218999200 | 0.0410951 | chr2:21899  | 0.0410951 |
| EMX1       | 2965 chr2  | 72994111  | 73000995  | 0.0411143 | chr2:07299  | 0.0411143 |
| RBM15      | 2970 chr1  | 110677832 | 110686027 | 0.0411337 | chr1:11068  | 0.0411337 |
| TBC1D16    | 2985 chr17 | 75536846  | 75629466  | 0.0412146 | chr17:0756  | 0.0412146 |
| THBD       | 2993 chr20 | 22975907  | 22982857  | 0.0412456 | chr20:0229  | 0.0412456 |
| NPC1L1     | 2994 chr7  | 44544934  | 44551390  | 0.0412492 | chr7:04454  | 0.0412492 |
| MFNG       | 2999 chr22 | 36209936  | 36216008  | 0.0412794 | chr22:0362  | 0.0412794 |
| GNAI3      | 3009 chr1  | 109889954 | 109938498 | 0.0413379 | chr1:10989  | 0.0413379 |
| RPL24      | 3011 chr3  | 102882847 | 102893341 | 0.0413562 | chr3:10288  | 0.0413562 |
| C1orf74    | 3013 chr1  | 208022337 | 208027888 | 0.0413618 | chr1:20802  | 0.0413618 |
| HAP1       | 3016 chr17 | 37142033  | 37149847  | 0.0413706 | chr17:0371  | 0.0413706 |
| FAM83A     | 3020 chr8  | 124258798 | 124266718 | 0.04138   | chr8:12426  | 0.04138   |
| TXN        | 3026 chr9  | 112056113 | 112062562 | 0.0414158 | chr9:11205  | 0.0414158 |
| C14orf106  | 3028 chr14 | 44786002  | 44796158  | 0.04142   | chr14:0447  | 0.04142   |
| PSMD14     | 3029 chr2  | 161867333 | 161976148 | 0.0414244 | chr2:16187  | 0.0414244 |
| TM6SF2     | 3033 chr19 | 19236154  | 19250647  | 0.0414588 | chr19:0192  | 0.0414588 |
| ALS2CL-TM  | 3037 chr3  | 46710426  | 46717692  | 0.041476  | chr3:04671  | 0.041476  |
| WNT5A      | 3041 chr3  | 55493875  | 55501767  | 0.0414948 | chr3:05549  | 0.0414948 |
| BNC1       | 3042 chr15 | 81741872  | 81749965  | 0.0414956 | chr15:0817  | 0.0414956 |
| RORC       | 3043 chr1  | 150045290 | 150076401 | 0.0415015 | chr1:15007  | 0.0415015 |
| CLCF1      | 3047 chr11 | 66895223  | 66903243  | 0.0415125 | chr11:0668  | 0.0415125 |
| CCKBR      | 3051 chr11 | 6233967   | 6239583   | 0.0415329 | chr11:0062  | 0.0415329 |
| ESD        | 3060 chr13 | 46267064  | 46274884  | 0.0415938 | chr13:0462  | 0.0415938 |
| STAB1      | 3062 chr3  | 52502326  | 52505867  | 0.0415968 | chr3:05250  | 0.0415968 |
| SLC2A11    | 3074 chr22 | 22524899  | 22532315  | 0.0416572 | chr22:0225  | 0.0416572 |
| PLEKHG2    | 3077 chr19 | 44591939  | 44597996  | 0.0416672 | chr19:0445  | 0.0416672 |
| ANXA4      | 3078 chr2  | 69820681  | 69907105  | 0.0416687 | chr2:06982  | 0.0416687 |
| FATE1      | 3082 chrX  | 150629874 | 150637650 | 0.0416881 | chrX:15063  | 0.0416881 |
| LRRC3B     | 3095 chr3  | 26633912  | 26641740  | 0.0417398 | chr3:02663  | 0.0417398 |
| NNT        | 3098 chr5  | 43634064  | 43641592  | 0.0417505 | chr5:04363  | 0.0417505 |
| ANP32B     | 3102 chr9  | 99780413  | 99787910  | 0.0417668 | chr9:09978  | 0.0417668 |
| RAX        | 3106 chr18 | 55088962  | 55097110  | 0.0418036 | chr18:0550  | 0.0418036 |
| KIAA1012   | 3108 chr18 | 27775033  | 27782083  | 0.0418181 | chr18:0277  | 0.0418181 |
| TITF1      | 3109 chr14 | 36055810  | 36064595  | 0.0418212 | chr14:0360  | 0.0418212 |
| FNDC1      | 3111 chr6  | 159504965 | 159512756 | 0.0418443 | chr6:15950  | 0.0418443 |
| TAF4       | 3116 chr20 | 60071795  | 60078916  | 0.0418657 | chr20:0600  | 0.0418657 |
| LOC389827  | 3118 chr9  | 135384487 | 135389623 | 0.0418786 | chr9:13538  | 0.0418786 |
| DIO3       | 3120 chr14 | 101092190 | 101099912 | 0.0419013 | chr14:1010  | 0.0419013 |
| SLC20A1    | 3125 chr2  | 113114545 | 113123375 | 0.0419533 | chr2:11311  | 0.0419533 |
| JDP2       | 3126 chr14 | 74963138  | 74971119  | 0.0419576 | chr14:0749  | 0.0419576 |
| TXN2       | 3128 chr22 | 35204337  | 35209959  | 0.0419639 | chr22:0352  | 0.0419639 |
| NCAM2      | 3130 chr21 | 21287054  | 21294950  | 0.0419678 | chr21:0212  | 0.0419678 |
| MEGF8      | 3131 chr19 | 47529095  | 47572896  | 0.0419691 | chr19:0475  | 0.0419691 |
| TBX2       | 3132 chr17 | 56826799  | 56841615  | 0.0419708 | chr17:0568  | 0.0419708 |
| MAP2K7     | 3142 chr19 | 7873549   | 7877078   | 0.0419992 | chr19:0078  | 0.0419992 |
| C19orf26-A | 3146 chr19 | 1188836   | 1192679   | 0.0420329 | chr19:0011  | 0.0420329 |
| SHH        | 3149 chr7  | 155295119 | 155302888 | 0.0420376 | chr7:15529  | 0.0420376 |
| KIAA0319   | 3157 chr6  | 24752990  | 24758069  | 0.0420872 | chr6:02475  | 0.0420872 |
| SLC25A1    | 3159 chr22 | 17543797  | 17551697  | 0.0420995 | chr22:0175  | 0.0420995 |
| CAMSAP1L   | 3166 chr1  | 198969956 | 198977519 | 0.0421295 | chr1:19897  | 0.0421295 |

|             |            |           |           |           |                 |           |
|-------------|------------|-----------|-----------|-----------|-----------------|-----------|
| PCMTD2      | 3176 chr20 | 62356062  | 62364281  | 0.0421787 | chr20:062356062 | 0.0421787 |
| SLC6A8      | 3178 chrX  | 152603219 | 152609607 | 0.0421837 | chrX:152603219  | 0.0421837 |
| ZNF197      | 3188 chr3  | 44636166  | 44662507  | 0.0422359 | chr3:044636166  | 0.0422359 |
| C1orf126-TI | 3190 chr1  | 15351622  | 15352803  | 0.0422496 | chr1:015351622  | 0.0422496 |
| STAT5B      | 3192 chr17 | 37604722  | 37683098  | 0.0422808 | chr17:037604722 | 0.0422808 |
| BET1L-RIC1  | 3231 chr11 | 197457    | 198108    | 0.0424718 | chr11:000197457 | 0.0424718 |
| GJB4        | 3232 chr1  | 34996851  | 35001933  | 0.0424737 | chr1:034996851  | 0.0424737 |
| ABCC3       | 3237 chr17 | 46061792  | 46069714  | 0.0425035 | chr17:046061792 | 0.0425035 |
| MUC4        | 3239 chr3  | 197020573 | 197028968 | 0.0425131 | chr3:197020573  | 0.0425131 |
| HOXD11      | 3245 chr2  | 176673761 | 176682573 | 0.0425371 | chr2:176673761  | 0.0425371 |
| TSLP        | 3248 chr5  | 110428192 | 110439088 | 0.0425392 | chr5:110428192  | 0.0425392 |
| NLRP12      | 3260 chr19 | 58999087  | 59024599  | 0.042602  | chr19:058999087 | 0.042602  |
| FASN        | 3271 chr17 | 77646940  | 77654797  | 0.0426394 | chr17:077646940 | 0.0426394 |
| CREM        | 3275 chr10 | 35451021  | 35526783  | 0.0426564 | chr10:035451021 | 0.0426564 |
| GTF2F1      | 3278 chr19 | 6331203   | 6349226   | 0.0426647 | chr19:006331203 | 0.0426647 |
| SCARF2      | 3279 chr22 | 19120601  | 19127280  | 0.0426657 | chr22:019120601 | 0.0426657 |
| KCNK16      | 3280 chr6  | 39390619  | 39403784  | 0.0426719 | chr6:039390619  | 0.0426719 |
| TSPAN5      | 3287 chr4  | 99796260  | 99804125  | 0.0427528 | chr4:099796260  | 0.0427528 |
| RAP1B       | 3291 chr12 | 67285441  | 67330852  | 0.042768  | chr12:067285441 | 0.042768  |
| SLC16A6     | 3292 chr17 | 63796473  | 63804475  | 0.0427723 | chr17:063796473 | 0.0427723 |
| C10orf27    | 3302 chr10 | 72212753  | 72216948  | 0.0428295 | chr10:072212753 | 0.0428295 |
| APOBEC3A    | 3307 chr22 | 37678152  | 37686146  | 0.042841  | chr22:037678152 | 0.042841  |
| LZTR1       | 3311 chr22 | 19665738  | 19683642  | 0.0428707 | chr22:019665738 | 0.0428707 |
| HDAC10      | 3314 chr22 | 49026136  | 49033245  | 0.0428885 | chr22:049026136 | 0.0428885 |
| ANKHD1      | 3316 chr5  | 139756264 | 139888250 | 0.0428932 | chr5:139756264  | 0.0428932 |
| ZFAND6      | 3318 chr15 | 78137727  | 78141606  | 0.0428965 | chr15:078137727 | 0.0428965 |
| RAB34-RPL   | 3319 chr17 | 24068998  | 24071037  | 0.0429081 | chr17:024068998 | 0.0429081 |
| ZNF621      | 3321 chr3  | 40538255  | 40543072  | 0.0429153 | chr3:040538255  | 0.0429153 |
| GAS2L1      | 3322 chr22 | 28027520  | 28038790  | 0.0429202 | chr22:028027520 | 0.0429202 |
| SNTB1       | 3324 chr8  | 121890843 | 121899150 | 0.0429268 | chr8:121890843  | 0.0429268 |
| KLHDC7B     | 3325 chr22 | 49327884  | 49336208  | 0.0429272 | chr22:049327884 | 0.0429272 |
| LILRA3      | 3331 chr19 | 59493579  | 59501529  | 0.0429449 | chr19:059493579 | 0.0429449 |
| TBCCD1-DI   | 3340 chr3  | 187767929 | 187771077 | 0.0429803 | chr3:187767929  | 0.0429803 |
| C6orf134    | 3343 chr6  | 30702205  | 30722576  | 0.042994  | chr6:030702205  | 0.042994  |
| hsa-mir-594 | 3345 chr7  | 138671206 | 138675926 | 0.0430189 | chr7:138671206  | 0.0430189 |
| KLHL30      | 3351 chr2  | 238708684 | 238716605 | 0.0430618 | chr2:238708684  | 0.0430618 |
| NFATC1      | 3357 chr18 | 75253029  | 75263841  | 0.0431055 | chr18:075253029 | 0.0431055 |
| CH25H       | 3366 chr10 | 90954555  | 90962128  | 0.0431544 | chr10:090954555 | 0.0431544 |
| LIMD2       | 3368 chr17 | 59128060  | 59136208  | 0.0431561 | chr17:059128060 | 0.0431561 |
| NR2F6       | 3374 chr19 | 17214647  | 17221855  | 0.0431784 | chr19:017214647 | 0.0431784 |
| PAK6        | 3378 chr15 | 38314038  | 38321790  | 0.0431961 | chr15:038314038 | 0.0431961 |
| COMMD5      | 3382 chr8  | 146047282 | 146054699 | 0.043232  | chr8:146047282  | 0.043232  |
| AGXT2       | 3385 chr5  | 35082150  | 35087531  | 0.043246  | chr5:035082150  | 0.043246  |
| HNRPL       | 3387 chr19 | 44019243  | 44035114  | 0.0432492 | chr19:044019243 | 0.0432492 |
| WNT11       | 3396 chr11 | 75592933  | 75600731  | 0.0433098 | chr11:075592933 | 0.0433098 |
| C6orf157-D  | 3408 chr6  | 83832276  | 83833739  | 0.0433584 | chr6:083832276  | 0.0433584 |
| DAB2        | 3414 chr5  | 39458170  | 39466149  | 0.0433756 | chr5:039458170  | 0.0433756 |
| CKB-C14orf  | 3419 chr14 | 103059125 | 103065176 | 0.0433924 | chr14:103059125 | 0.0433924 |
| CYB561      | 3425 chr17 | 58866225  | 58882531  | 0.043423  | chr17:058866225 | 0.043423  |
| SLC25A39    | 3430 chr17 | 39755194  | 39762552  | 0.043441  | chr17:039755194 | 0.043441  |
| C1QL4-FLJ   | 3431 chr12 | 48017571  | 48027244  | 0.0434419 | chr12:048017571 | 0.0434419 |
| EGLN2       | 3433 chr19 | 45994666  | 46000787  | 0.0434568 | chr19:045994666 | 0.0434568 |
| ZNF767      | 3434 chr7  | 148950114 | 148957985 | 0.0434623 | chr7:148950114  | 0.0434623 |
| TNFRSF1B    | 3436 chr1  | 12144383  | 12151868  | 0.0434691 | chr1:012144383  | 0.0434691 |
| C3orf58     | 3438 chr3  | 145168201 | 145176294 | 0.0434695 | chr3:145168201  | 0.0434695 |
| USH1G-OT1   | 3439 chr17 | 70431027  | 70431940  | 0.0434732 | chr17:070431027 | 0.0434732 |
| GTF3C1-KI   | 3440 chr16 | 27468921  | 27468965  | 0.043478  | chr16:027468921 | 0.043478  |
| GHRL        | 3448 chr3  | 10304509  | 10311556  | 0.0435258 | chr3:010304509  | 0.0435258 |

|            |            |           |           |           |             |           |
|------------|------------|-----------|-----------|-----------|-------------|-----------|
| MARK3      | 3453 chr14 | 102916136 | 102924539 | 0.0435467 | chr14:10292 | 0.0435467 |
| JUNB       | 3454 chr19 | 12757866  | 12766037  | 0.0435678 | chr19:01276 | 0.0435678 |
| AKT1       | 3465 chr14 | 104327518 | 104338570 | 0.0436296 | chr14:10433 | 0.0436296 |
| DPF1       | 3470 chr19 | 43404742  | 43412071  | 0.0436675 | chr19:0434  | 0.0436675 |
| AGRP       | 3474 chr16 | 66074083  | 66078405  | 0.0436834 | chr16:06607 | 0.0436834 |
| GRASP      | 3479 chr12 | 50682608  | 50689513  | 0.0436997 | chr12:05068 | 0.0436997 |
| FKBP2      | 3491 chr11 | 63762999  | 63768355  | 0.043736  | chr11:06376 | 0.043736  |
| TRPM5      | 3493 chr11 | 2382156   | 2406242   | 0.0437481 | chr11:00240 | 0.0437481 |
| ALOXE3     | 3495 chr17 | 7959560   | 7965484   | 0.0437575 | chr17:00796 | 0.0437575 |
| ZNF660     | 3496 chr3  | 44601074  | 44612628  | 0.0437713 | chr3:04460  | 0.0437713 |
| COQ6       | 3497 chr14 | 73480884  | 73492035  | 0.0437813 | chr14:07348 | 0.0437813 |
| RFTN1      | 3503 chr3  | 16528143  | 16535056  | 0.043808  | chr3:016530 | 0.043808  |
| SLC39A6-S  | 3505 chr18 | 31963271  | 31963838  | 0.0438216 | chr18:03196 | 0.0438216 |
| DLX3       | 3507 chr17 | 45424980  | 45430937  | 0.0438239 | chr17:04542 | 0.0438239 |
| CRKL       | 3510 chr22 | 19598900  | 19604494  | 0.0438496 | chr22:01960 | 0.0438496 |
| RPS6KA3    | 3522 chrX  | 20192180  | 20200157  | 0.0439003 | chrX:02019  | 0.0439003 |
| WISP3      | 3526 chr6  | 112476517 | 112489917 | 0.0439286 | chr6:112482 | 0.0439286 |
| DNM1L      | 3539 chr12 | 32718127  | 32725963  | 0.0439964 | chr12:03272 | 0.0439964 |
| ARAF       | 3545 chrX  | 47300225  | 47307788  | 0.0440328 | chrX:04730  | 0.0440328 |
| LRFN2      | 3551 chr6  | 40660648  | 40668461  | 0.0440701 | chr6:04066  | 0.0440701 |
| DMAP1      | 3553 chr1  | 44447453  | 44454246  | 0.0440792 | chr1:044450 | 0.0440792 |
| ACP5       | 3555 chr19 | 11546783  | 11554170  | 0.0440882 | chr19:01155 | 0.0440882 |
| GPR175-M   | 3557 chr3  | 128790646 | 128791946 | 0.0441049 | chr3:12879  | 0.0441049 |
| RBP7       | 3573 chr1  | 9979010   | 9982412   | 0.0441596 | chr1:009979 | 0.0441596 |
| PIN1       | 3580 chr19 | 9801981   | 9808544   | 0.0442371 | chr19:00980 | 0.0442371 |
| SFMBT1     | 3581 chr3  | 52978238  | 53060508  | 0.0442395 | chr3:05305  | 0.0442395 |
| TSC22D3    | 3582 chrX  | 106843797 | 106908556 | 0.0442423 | chrX:10684  | 0.0442423 |
| TBC1D14    | 3586 chr4  | 6957888   | 6964554   | 0.0442624 | chr4:00695  | 0.0442624 |
| SPTBN5     | 3589 chr15 | 39971213  | 39978844  | 0.0442957 | chr15:03997 | 0.0442957 |
| SELPLG     | 3609 chr12 | 107549636 | 107557203 | 0.0443839 | chr12:10755 | 0.0443839 |
| SLC10A7    | 3619 chr4  | 147660027 | 147664278 | 0.0444135 | chr4:14766  | 0.0444135 |
| SLC24A2    | 3626 chr9  | 19774509  | 19782347  | 0.0444399 | chr9:01977  | 0.0444399 |
| MAP4K1-EI  | 3630 chr19 | 43800504  | 43801521  | 0.0444539 | chr19:04380 | 0.0444539 |
| RKHD3      | 3631 chr15 | 80122685  | 80130937  | 0.0444629 | chr15:08012 | 0.0444629 |
| PPAPDC3    | 3633 chr9  | 133151921 | 133157573 | 0.044472  | chr9:13315  | 0.044472  |
| DPEP1      | 3643 chr16 | 88209039  | 88226591  | 0.0445099 | chr16:0882  | 0.0445099 |
| PEX12-AP2  | 3651 chr17 | 30929765  | 30938349  | 0.0445393 | chr17:03092 | 0.0445393 |
| RHOD       | 3652 chr11 | 66575946  | 66583228  | 0.0445455 | chr11:06657 | 0.0445455 |
| WNK2       | 3660 chr9  | 94981649  | 94989522  | 0.0445957 | chr9:09498  | 0.0445957 |
| PTGIR      | 3666 chr19 | 51816872  | 51828988  | 0.0446497 | chr19:05182 | 0.0446497 |
| HRH3-FLJ4  | 3686 chr20 | 60230688  | 60234104  | 0.0447402 | chr20:06023 | 0.0447402 |
| TSGA2-SLC  | 3689 chr21 | 42789542  | 42792820  | 0.0447555 | chr21:04278 | 0.0447555 |
| PRRG3      | 3692 chrX  | 150612544 | 150620458 | 0.0447681 | chrX:15061  | 0.0447681 |
| CHKA       | 3699 chr11 | 67642732  | 67650545  | 0.044798  | chr11:06764 | 0.044798  |
| CRYL1      | 3705 chr13 | 19995606  | 20002599  | 0.0448123 | chr13:01999 | 0.0448123 |
| ZNF238     | 3707 chr1  | 242275947 | 242286211 | 0.0448158 | chr1:24227  | 0.0448158 |
| NT5M       | 3716 chr17 | 17146985  | 17149812  | 0.0448495 | chr17:01714 | 0.0448495 |
| TMEM176B   | 3737 chr7  | 150129431 | 150133155 | 0.0449803 | chr7:15013  | 0.0449803 |
| CRSP2      | 3738 chrX  | 40392486  | 40484955  | 0.0449824 | chrX:04048  | 0.0449824 |
| MYOCD      | 3739 chr17 | 12505181  | 12512604  | 0.0449985 | chr17:01250 | 0.0449985 |
| CST9       | 3740 chr20 | 23532139  | 23540008  | 0.045006  | chr20:02353 | 0.045006  |
| C19orf6-CN | 3741 chr19 | 972187    | 977218    | 0.0450267 | chr19:00097 | 0.0450267 |
| CHAC1      | 3743 chr15 | 39027480  | 39035580  | 0.0450347 | chr15:03902 | 0.0450347 |
| PGLYRP4-ε  | 3747 chr1  | 151587911 | 151596889 | 0.0450547 | chr1:15158  | 0.0450547 |
| GRAMD2     | 3748 chr15 | 70274854  | 70278393  | 0.0450651 | chr15:07027 | 0.0450651 |
| C18orf1    | 3750 chr18 | 13203309  | 13604301  | 0.0450722 | chr18:01320 | 0.0450722 |
| GHDC       | 3759 chr17 | 37595113  | 37604671  | 0.0451503 | chr17:03759 | 0.0451503 |
| GNAO1      | 3763 chr16 | 54778343  | 54786233  | 0.0451777 | chr16:05477 | 0.0451777 |

|             |            |           |           |           |             |           |
|-------------|------------|-----------|-----------|-----------|-------------|-----------|
| REN         | 3767 chr1  | 202390640 | 202407557 | 0.0451916 | chr1:20240  | 0.0451916 |
| TSPAN2      | 3770 chr1  | 115432050 | 115436909 | 0.0452028 | chr1:11543  | 0.0452028 |
| ATF5        | 3786 chr19 | 55119132  | 55124525  | 0.045266  | chr19:0551  | 0.045266  |
| SIPA1L3     | 3800 chr19 | 43084620  | 43092204  | 0.0453409 | chr19:0430  | 0.0453409 |
| POU3F2      | 3806 chr6  | 99383980  | 99391979  | 0.0453685 | chr6:09938  | 0.0453685 |
| RTTN        | 3809 chr18 | 66021937  | 66029111  | 0.0453835 | chr18:0660  | 0.0453835 |
| KRT13       | 3810 chr17 | 36912823  | 36920741  | 0.0453926 | chr17:0369  | 0.0453926 |
| LSM14B      | 3812 chr20 | 60125402  | 60143837  | 0.0453935 | chr20:0601  | 0.0453935 |
| GPRC5C      | 3815 chr17 | 69933195  | 69942255  | 0.0454182 | chr17:0699  | 0.0454182 |
| CHI3L2      | 3829 chr1  | 111566589 | 111574323 | 0.0454962 | chr1:111571 | 0.0454962 |
| LETM1       | 3835 chr4  | 1825378   | 1832924   | 0.0455064 | chr4:00182  | 0.0455064 |
| SNTB2       | 3838 chr16 | 67773225  | 67900321  | 0.0455504 | chr16:0677  | 0.0455504 |
| LMO6        | 3845 chrX  | 48927198  | 48931201  | 0.045593  | chrX:04893  | 0.045593  |
| HSPB7-CLC   | 3846 chr1  | 16217591  | 16221006  | 0.0455951 | chr1:01621  | 0.0455951 |
| FGD6        | 3850 chr12 | 94130525  | 94140827  | 0.0456199 | chr12:0941  | 0.0456199 |
| SAPS1       | 3853 chr19 | 60432934  | 60465179  | 0.045639  | chr19:0604  | 0.045639  |
| YAP1        | 3854 chr11 | 101481386 | 101489227 | 0.0456473 | chr11:1014  | 0.0456473 |
| FGF3        | 3862 chr11 | 69340322  | 69348227  | 0.0456818 | chr11:0693  | 0.0456818 |
| PDGFB       | 3871 chr22 | 37967445  | 37976407  | 0.0457127 | chr22:0379  | 0.0457127 |
| RALGDS      | 3878 chr9  | 134983881 | 134991495 | 0.0457561 | chr9:1349   | 0.0457561 |
| RPL28       | 3883 chr19 | 60581402  | 60592050  | 0.0457783 | chr19:0605  | 0.0457783 |
| PKP3        | 3884 chr11 | 381108    | 386758    | 0.0457788 | chr11:0003  | 0.0457788 |
| BTK-RPL36   | 3898 chrX  | 100527871 | 100532616 | 0.0458634 | chrX:10053  | 0.0458634 |
| EML2        | 3899 chr19 | 50832025  | 50839878  | 0.0458689 | chr19:0508  | 0.0458689 |
| SIRT2-NFKI  | 3902 chr19 | 44082298  | 44082468  | 0.045879  | chr19:0440  | 0.045879  |
| hsa-mir-9-3 | 3907 chr15 | 87706785  | 87714662  | 0.0458953 | chr15:0877  | 0.0458953 |
| U70         | 3908 chrX  | 153279981 | 153281747 | 0.0458985 | chrX:15327  | 0.0458985 |
| CBX4        | 3909 chr17 | 75425232  | 75433283  | 0.0459034 | chr17:0754  | 0.0459034 |
| ARHGEF16    | 3911 chr1  | 3364598   | 3372492   | 0.045933  | chr1:00336  | 0.045933  |
| SULT2B1     | 3916 chr19 | 53741968  | 53771422  | 0.0459692 | chr19:0537  | 0.0459692 |
| FUT8        | 3920 chr14 | 64941876  | 65208336  | 0.0460051 | chr14:0649  | 0.0460051 |
| ARFGAP3     | 3926 chr22 | 41580627  | 41588365  | 0.0460299 | chr22:0415  | 0.0460299 |
| ESRRA       | 3929 chr11 | 63824320  | 63839774  | 0.0460342 | chr11:0638  | 0.0460342 |
| ICAM1       | 3933 chr19 | 10238467  | 10257948  | 0.0460416 | chr19:0102  | 0.0460416 |
| PTBP1       | 3938 chr19 | 742949    | 750907    | 0.0460549 | chr19:0007  | 0.0460549 |
| CALCR       | 3943 chr7  | 92948803  | 93047461  | 0.0460806 | chr7:09304  | 0.0460806 |
| MGC34824    | 3947 chr2  | 38206402  | 38212991  | 0.0461003 | chr2:03821  | 0.0461003 |
| DNAH1       | 3950 chr3  | 52320245  | 52327942  | 0.0461231 | chr3:05232  | 0.0461231 |
| EPS8L3      | 3954 chr1  | 110105667 | 110112673 | 0.0461423 | chr1:11011  | 0.0461423 |
| PGD         | 3979 chr1  | 10381373  | 10384239  | 0.0463149 | chr1:01038  | 0.0463149 |
| MYH10       | 3982 chr17 | 8472271   | 8477796   | 0.0463341 | chr17:0084  | 0.0463341 |
| ATP6V0A4    | 3991 chr7  | 138107343 | 138138701 | 0.0463891 | chr7:13810  | 0.0463891 |
| SQSTM1      | 3992 chr5  | 179176526 | 179182731 | 0.0464025 | chr5:17917  | 0.0464025 |
| hsa-mir-124 | 4021 chr20 | 61274803  | 61282675  | 0.046545  | chr20:0612  | 0.046545  |
| MAPKBP1     | 4035 chr15 | 39849635  | 39907348  | 0.0466226 | chr15:0398  | 0.0466226 |
| HSPA12B     | 4045 chr20 | 3655893   | 3663776   | 0.0466554 | chr20:0036  | 0.0466554 |
| GPR146      | 4047 chr7  | 1058224   | 1065566   | 0.046657  | chr7:00106  | 0.046657  |
| LAPTM4A     | 4058 chr2  | 20112322  | 20118134  | 0.0467289 | chr2:02011  | 0.0467289 |
| BOLA1       | 4060 chr1  | 148137222 | 148140097 | 0.0467479 | chr1:14813  | 0.0467479 |
| HOXD9       | 4082 chr2  | 176692975 | 176697785 | 0.0468106 | chr2:17669  | 0.0468106 |
| RHOF        | 4083 chr12 | 120713884 | 120724688 | 0.0468337 | chr12:1207  | 0.0468337 |
| PLA2R1      | 4085 chr2  | 160625193 | 160630413 | 0.0468382 | chr2:16062  | 0.0468382 |
| LCN6        | 4094 chr9  | 138760385 | 138768293 | 0.0468638 | chr9:13876  | 0.0468638 |
| HPCA        | 4102 chr1  | 33119236  | 33127161  | 0.0468946 | chr1:03312  | 0.0468946 |
| FBXO43-PC   | 4106 chr8  | 101227479 | 101231924 | 0.04692   | chr8:10123  | 0.04692   |
| TGM2        | 4119 chr20 | 36224791  | 36232417  | 0.0469957 | chr20:0362  | 0.0469957 |
| NSUN5       | 4121 chr7  | 72359590  | 72363832  | 0.0470046 | chr7:07236  | 0.0470046 |
| RTN4RL2     | 4122 chr11 | 56979650  | 56987082  | 0.0470217 | chr11:0569  | 0.0470217 |

|             |            |           |           |           |             |           |
|-------------|------------|-----------|-----------|-----------|-------------|-----------|
| P2RX1       | 4123 chr17 | 3746649   | 3771953   | 0.0470255 | chr17:00376 | 0.0470255 |
| NUDT14      | 4132 chr14 | 104710370 | 104723494 | 0.0470604 | chr14:1047  | 0.0470604 |
| SLC12A5     | 4151 chr20 | 44086053  | 44093819  | 0.0471261 | chr20:0440  | 0.0471261 |
| ANGPTL4     | 4154 chr19 | 8332738   | 8337640   | 0.0471359 | chr19:0083  | 0.0471359 |
| SLITRK5     | 4155 chr13 | 87117578  | 87125491  | 0.0471438 | chr13:0871  | 0.0471438 |
| CIDEB       | 4157 chr14 | 23850426  | 23850803  | 0.0471537 | chr14:0238  | 0.0471537 |
| GAPDH       | 4161 chr12 | 6511538   | 6516539   | 0.0471641 | chr12:0065  | 0.0471641 |
| UQCR        | 4172 chr19 | 1548880   | 1560188   | 0.0472634 | chr19:0015  | 0.0472634 |
| C12orf30    | 4173 chr12 | 111028526 | 111035273 | 0.0472652 | chr12:1110  | 0.0472652 |
| ELAC2       | 4186 chr17 | 12859854  | 12867332  | 0.0473174 | chr17:0128  | 0.0473174 |
| ABCB9       | 4203 chr12 | 122008911 | 122030244 | 0.0474293 | chr12:1220  | 0.0474293 |
| hsa-mir-499 | 4207 chr20 | 33036559  | 33041923  | 0.0474613 | chr20:0330  | 0.0474613 |
| FLJ43582    | 4220 chr8  | 38503520  | 38509438  | 0.0475207 | chr8:0385   | 0.0475207 |
| TOP2A       | 4223 chr17 | 35825173  | 35833169  | 0.0475375 | chr17:0358  | 0.0475375 |
| RING1       | 4224 chr6  | 33283785  | 33286046  | 0.0475425 | chr6:0332   | 0.0475425 |
| PRIMA1      | 4226 chr14 | 93321411  | 93329630  | 0.0475504 | chr14:0933  | 0.0475504 |
| HEL308-MF   | 4229 chr4  | 84596084  | 84596130  | 0.0475603 | chr4:0845   | 0.0475603 |
| SPATC1      | 4230 chr8  | 145153208 | 145160901 | 0.0475615 | chr8:1451   | 0.0475615 |
| GLB1L3      | 4246 chr11 | 133645977 | 133653360 | 0.0476331 | chr11:1336  | 0.0476331 |
| BAIAP2      | 4253 chr17 | 76618977  | 76626142  | 0.0476778 | chr17:0766  | 0.0476778 |
| VPS35-ORC   | 4258 chr16 | 45280585  | 45280979  | 0.047697  | chr16:0452  | 0.047697  |
| SLC6A4      | 4262 chr17 | 25570863  | 25591465  | 0.0477143 | chr17:0255  | 0.0477143 |
| SPIN3       | 4272 chrX  | 57035523  | 57039598  | 0.0477694 | chrX:0570   | 0.0477694 |
| WDR40B      | 4273 chrX  | 125512061 | 125518741 | 0.0477847 | chrX:1255   | 0.0477847 |
| C14orf48    | 4284 chr14 | 93528466  | 93536677  | 0.0478551 | chr14:0935  | 0.0478551 |
| UBE1        | 4299 chrX  | 46931164  | 46959474  | 0.0479376 | chrX:0469   | 0.0479376 |
| ITGA5       | 4300 chr12 | 53075200  | 53104839  | 0.047938  | chr12:0530  | 0.047938  |
| hsa-mir-564 | 4317 chr3  | 44876607  | 44878363  | 0.0479868 | chr3:0448   | 0.0479868 |
| C10orf119   | 4318 chr10 | 121619973 | 121625882 | 0.0479958 | chr10:1216  | 0.0479958 |
| RBM14       | 4321 chr11 | 66136665  | 66152575  | 0.0480222 | chr11:0661  | 0.0480222 |
| CACNA1G     | 4327 chr17 | 45988374  | 45996245  | 0.0480655 | chr17:0459  | 0.0480655 |
| MSRA        | 4328 chr8  | 9943723   | 9951939   | 0.0480752 | chr8:0099   | 0.0480752 |
| DIAPH2      | 4335 chrX  | 95820914  | 96028063  | 0.0481244 | chrX:0958   | 0.0481244 |
| RCOR2       | 4343 chr11 | 63438018  | 63445934  | 0.048159  | chr11:0634  | 0.048159  |
| NOM1        | 4363 chr7  | 156429740 | 156438148 | 0.0482607 | chr7:1564   | 0.0482607 |
| GATA6       | 4364 chr18 | 17998108  | 18005706  | 0.0482609 | chr18:0179  | 0.0482609 |
| C9orf140-U  | 4367 chr9  | 139084904 | 139092423 | 0.0482659 | chr9:1390   | 0.0482659 |
| TMEM92      | 4390 chr17 | 45701458  | 45708958  | 0.0484136 | chr17:0457  | 0.0484136 |
| TROAP       | 4393 chr12 | 48000074  | 48006138  | 0.0484335 | chr12:0480  | 0.0484335 |
| OPRS1-GA    | 4394 chr9  | 34627856  | 34636612  | 0.0484348 | chr9:0346   | 0.0484348 |
| TGDS-GPR    | 4396 chr13 | 94046589  | 94052048  | 0.0484492 | chr13:0940  | 0.0484492 |
| HPSE2       | 4415 chr10 | 100983131 | 100990767 | 0.0485555 | chr10:1009  | 0.0485555 |
| hsa-mir-223 | 4418 chrX  | 65150058  | 65156935  | 0.0485766 | chrX:0651   | 0.0485766 |
| TAGLN       | 4432 chr11 | 116573490 | 116580563 | 0.0486722 | chr11:1165  | 0.0486722 |
| NLGN4Y      | 4454 chrY  | 15139658  | 15245982  | 0.0487578 | chrY:0151   | 0.0487578 |
| IRS1        | 4455 chr2  | 227369378 | 227378071 | 0.048762  | chr2:2273   | 0.048762  |
| ZNF31       | 4458 chr1  | 33705422  | 33713083  | 0.0487711 | chr1:0337   | 0.0487711 |
| TENC1       | 4469 chr12 | 51722522  | 51732730  | 0.0488437 | chr12:0517  | 0.0488437 |
| TCEB2       | 4478 chr16 | 2764681   | 2772744   | 0.0488795 | chr16:0027  | 0.0488795 |
| TMEM101     | 4487 chr17 | 39445503  | 39451853  | 0.0489115 | chr17:0394  | 0.0489115 |
| TMEM145     | 4507 chr19 | 47507154  | 47511412  | 0.0490187 | chr19:0475  | 0.0490187 |
| SASS6-CCI   | 4511 chr1  | 100371152 | 100371196 | 0.0490431 | chr1:1003   | 0.0490431 |
| CHRNA4      | 4516 chr20 | 61460636  | 61468532  | 0.0490931 | chr20:0614  | 0.0490931 |
| KIF13A      | 4523 chr6  | 18093262  | 18101281  | 0.0491239 | chr6:0180   | 0.0491239 |
| TMEM80      | 4525 chr11 | 680891    | 685651    | 0.0491308 | chr11:0006  | 0.0491308 |
| GALR3       | 4532 chr22 | 36543824  | 36551777  | 0.0491612 | chr22:0365  | 0.0491612 |
| CALML4      | 4535 chr15 | 66283233  | 66286188  | 0.0491661 | chr15:0662  | 0.0491661 |
| RPP25       | 4537 chr15 | 73033565  | 73042242  | 0.0491739 | chr15:0730  | 0.0491739 |

|            |            |           |           |           |             |           |
|------------|------------|-----------|-----------|-----------|-------------|-----------|
| METTL5     | 4551 chr2  | 170387190 | 170395001 | 0.0492581 | chr2:170390 | 0.0492581 |
| TXNL6-SLC  | 4553 chr19 | 17432721  | 17442153  | 0.0492714 | chr19:0174  | 0.0492714 |
| SLC40A1    | 4573 chr2  | 190151235 | 190159320 | 0.0493603 | chr2:19015  | 0.0493603 |
| BCAS3      | 4576 chr17 | 56106352  | 56112782  | 0.0493674 | chr17:0561  | 0.0493674 |
| PCTK1      | 4586 chrX  | 46959699  | 46974351  | 0.0494453 | chrX:04695  | 0.0494453 |
| MYH6       | 4607 chr14 | 22925331  | 22951579  | 0.0495639 | chr14:0229  | 0.0495639 |
| INHA       | 4612 chr2  | 220139830 | 220147683 | 0.049581  | chr2:22014  | 0.049581  |
| KIAA0152   | 4614 chr12 | 119607113 | 119611967 | 0.0495944 | chr12:1196  | 0.0495944 |
| RHPN2      | 4615 chr19 | 38245558  | 38253045  | 0.0496001 | chr19:0382  | 0.0496001 |
| BAT5-C6orf | 4632 chr6  | 31779162  | 31782519  | 0.0496723 | chr6:03177  | 0.0496723 |
| BCL11B     | 4646 chr14 | 98805000  | 98813103  | 0.0497475 | chr14:0988  | 0.0497475 |
| ARPC2      | 4666 chr2  | 218784694 | 218792935 | 0.0498569 | chr2:21878  | 0.0498569 |
| TP53BP1-N  | 4670 chr15 | 41590118  | 41597007  | 0.0498733 | chr15:0415  | 0.0498733 |
| RSL1D1     | 4673 chr16 | 11850948  | 11856356  | 0.0498828 | chr16:0118  | 0.0498828 |
| KIAA0404-F | 4675 chr11 | 64441417  | 64448498  | 0.0499187 | chr11:0644  | 0.0499187 |

### HPSE- bound genes (promoter region)

### ST subset (356 genes)

| Gene       | Rank (Hep-2) | Chromosome | Start     | End       | Min P(Xbar) | Probe      | P(Xbar)   |
|------------|--------------|------------|-----------|-----------|-------------|------------|-----------|
| FNBP1-GPI  | 109          | chr9       | 131845863 | 131854520 | 0.0191227   | chr9:13184 | 0.0191227 |
| GLUL       | 197          | chr1       | 180624667 | 180633067 | 0.0213239   | chr1:18062 | 0.0213239 |
| CYHR1-KIF  | 241          | chr8       | 145661654 | 145662485 | 0.0220756   | chr8:14566 | 0.0220756 |
| PGRMC2     | 308          | chr4       | 129426034 | 129433694 | 0.0231493   | chr4:12942 | 0.0231493 |
| KBTBD2     | 312          | chr7       | 32895762  | 32902507  | 0.023223    | chr7:03289 | 0.023223  |
| ASPH       | 329          | chr8       | 62762332  | 62795141  | 0.0233948   | chr8:0627  | 0.0233948 |
| KIF9-KLHL1 | 338          | chr3       | 47299132  | 47299398  | 0.0234838   | chr3:0472  | 0.0234838 |
| C1orf183   | 344          | chr1       | 112080926 | 112101764 | 0.0235434   | chr1:1120  | 0.0235434 |
| FEZF1      | 348          | chr7       | 121729259 | 121737236 | 0.0236055   | chr7:1217  | 0.0236055 |
| HNRPD      | 356          | chr4       | 83511336  | 83518809  | 0.0236787   | chr4:0835  | 0.0236787 |
| UBE2F      | 364          | chr2       | 238535557 | 238542899 | 0.0237765   | chr2:2385  | 0.0237765 |
| FILIP1L    | 387          | chr3       | 101075292 | 101321439 | 0.0239308   | chr3:1010  | 0.0239308 |
| MAK10      | 399          | chr9       | 87740438  | 87748406  | 0.0241083   | chr9:0877  | 0.0241083 |
| ZHX2       | 460          | chr8       | 123859030 | 123865678 | 0.024864    | chr8:1238  | 0.024864  |
| CPOX       | 521          | chr3       | 99792739  | 99800280  | 0.0256007   | chr3:0997  | 0.0256007 |
| MKLN1      | 536          | chr7       | 130658385 | 130665682 | 0.0258055   | chr7:1306  | 0.0258055 |
| ZNF416-ZIK | 598          | chr19      | 62782096  | 62787359  | 0.0263676   | chr19:0627 | 0.0263676 |
| SEPHS1     | 646          | chr10      | 13425254  | 13434653  | 0.0267822   | chr10:0134 | 0.0267822 |
| PON3       | 672          | chr7       | 94861651  | 94869092  | 0.0270484   | chr7:0948  | 0.0270484 |
| MYO10      | 813          | chr5       | 16986726  | 16993675  | 0.0282564   | chr5:0169  | 0.0282564 |
| SLC22A3    | 858          | chr6       | 160684032 | 160691861 | 0.0286356   | chr6:1606  | 0.0286356 |
| KHK        | 874          | chr2       | 27162843  | 27166105  | 0.0287529   | chr2:0271  | 0.0287529 |
| PMAIP1     | 895          | chr18      | 55713261  | 55720851  | 0.0289534   | chr18:055  | 0.0289534 |
| F2R        | 941          | chr5       | 76042224  | 76050349  | 0.0292161   | chr5:0760  | 0.0292161 |
| CORO2A     | 942          | chr9       | 99926639  | 100000239 | 0.0292364   | chr9:0999  | 0.0292364 |
| RBPMS      | 956          | chr8       | 30357082  | 30364620  | 0.0294003   | chr8:0303  | 0.0294003 |
| HRBL       | 969          | chr7       | 99969905  | 99977403  | 0.0295725   | chr7:0999  | 0.0295725 |
| KIAA2013-F | 994          | chr1       | 11909267  | 11917265  | 0.0297299   | chr1:0119  | 0.0297299 |
| PENK       | 1007         | chr8       | 57518842  | 57526225  | 0.0297939   | chr8:0575  | 0.0297939 |
| SSBP3      | 1010         | chr1       | 54641972  | 54649389  | 0.0298147   | chr1:0546  | 0.0298147 |
| OR2S2      | 1020         | chr9       | 35946590  | 35953569  | 0.0299129   | chr9:0359  | 0.0299129 |
| DOCK7      | 1031         | chr1       | 62924285  | 62931994  | 0.030059    | chr1:0629  | 0.030059  |
| RAPH1      | 1070         | chr2       | 204105829 | 204113584 | 0.0302973   | chr2:2041  | 0.0302973 |
| SFXN5      | 1073         | chr2       | 73150224  | 73153963  | 0.0303174   | chr2:0731  | 0.0303174 |
| PSMD5      | 1089         | chr9       | 122643219 | 122650556 | 0.0304442   | chr9:1226  | 0.0304442 |
| ELMOD2     | 1111         | chr4       | 141662713 | 141667324 | 0.0306049   | chr4:1416  | 0.0306049 |
| CYP2U1     | 1174         | chr4       | 109066902 | 109074062 | 0.031064    | chr4:1090  | 0.031064  |
| EVC2-EVC   | 1176         | chr4       | 5761367   | 5763471   | 0.0310654   | chr4:0057  | 0.0310654 |
| TIGD2      | 1185         | chr4       | 90249763  | 90255555  | 0.0310978   | chr4:0902  | 0.0310978 |

|             |            |           |           |           |             |           |
|-------------|------------|-----------|-----------|-----------|-------------|-----------|
| H2AFV       | 1195 chr7  | 44851569  | 44857779  | 0.0311547 | chr7:044854 | 0.0311547 |
| LOC13094C   | 1202 chr2  | 159021493 | 159021537 | 0.0312012 | chr2:159021 | 0.0312012 |
| USP1        | 1203 chr1  | 62669713  | 62677304  | 0.0312046 | chr1:062674 | 0.0312046 |
| CEP72       | 1281 chr5  | 660124    | 665837    | 0.0316632 | chr5:000665 | 0.0316632 |
| UGP2        | 1285 chr2  | 63916398  | 63924975  | 0.031692  | chr2:063922 | 0.031692  |
| DLC1        | 1296 chr8  | 13032495  | 13421534  | 0.0317728 | chr8:013035 | 0.0317728 |
| SPBC24      | 1309 chr19 | 11127288  | 11132317  | 0.0318823 | chr19:01112 | 0.0318823 |
| HNRPK       | 1329 chr9  | 85772213  | 85785246  | 0.0320447 | chr9:085785 | 0.0320447 |
| IFNAR1      | 1351 chr21 | 33615171  | 33621381  | 0.0321401 | chr21:03361 | 0.0321401 |
| LOC339745   | 1386 chr2  | 138970363 | 138978192 | 0.032416  | chr2:138975 | 0.032416  |
| SAMD4A      | 1389 chr14 | 54098695  | 54106866  | 0.0324389 | chr14:05410 | 0.0324389 |
| KIAA1212    | 1411 chr2  | 55497808  | 55505972  | 0.0325526 | chr2:055500 | 0.0325526 |
| MORN1-RE    | 1415 chr1  | 2312846   | 2313080   | 0.0325704 | chr1:002311 | 0.0325704 |
| KIAA0922    | 1424 chr4  | 154602810 | 154609040 | 0.0326404 | chr4:154600 | 0.0326404 |
| RAB1F       | 1448 chr1  | 201123895 | 201130359 | 0.0328411 | chr1:201124 | 0.0328411 |
| RNF32       | 1452 chr7  | 156120701 | 156130368 | 0.0328534 | chr7:156125 | 0.0328534 |
| FLJ20701    | 1473 chr2  | 229833684 | 229849674 | 0.0330419 | chr2:229840 | 0.0330419 |
| CHD1        | 1484 chr5  | 98288002  | 98295341  | 0.03312   | chr5:098292 | 0.03312   |
| ST8SIA1     | 1486 chr12 | 22375986  | 22383383  | 0.0331362 | chr12:02237 | 0.0331362 |
| ITGA1       | 1487 chr5  | 52119548  | 52134495  | 0.0331376 | chr5:052119 | 0.0331376 |
| CCNG2       | 1509 chr4  | 78292338  | 78299985  | 0.0333192 | chr4:078292 | 0.0333192 |
| LENG8       | 1522 chr19 | 59649932  | 59664683  | 0.0334319 | chr19:05964 | 0.0334319 |
| PRDM5       | 1548 chr4  | 122060791 | 122066615 | 0.0335887 | chr4:122060 | 0.0335887 |
| SKP1A       | 1557 chr5  | 133538137 | 133544836 | 0.0336431 | chr5:133541 | 0.0336431 |
| TFE3        | 1574 chrX  | 48785314  | 48792287  | 0.0337614 | chrX:048785 | 0.0337614 |
| KCNH3       | 1587 chr12 | 48214223  | 48221947  | 0.033842  | chr12:04821 | 0.033842  |
| EPB41L4A    | 1597 chr5  | 111525852 | 111788379 | 0.033915  | chr5:111782 | 0.033915  |
| NCBP1       | 1599 chr9  | 99426771  | 99435488  | 0.0339242 | chr9:099435 | 0.0339242 |
| THPO-CHR    | 1615 chr3  | 185578683 | 185580430 | 0.0340124 | chr3:185579 | 0.0340124 |
| WHSC1L1-I   | 1624 chr8  | 38359032  | 38363028  | 0.0340313 | chr8:038362 | 0.0340313 |
| EMILIN3     | 1646 chr20 | 39426229  | 39433775  | 0.0341955 | chr20:03942 | 0.0341955 |
| JAK2        | 1647 chr9  | 4969761   | 5012956   | 0.0341986 | chr9:004974 | 0.0341986 |
| C18orf10    | 1668 chr18 | 32663066  | 32668496  | 0.034281  | chr18:03266 | 0.034281  |
| CYR61       | 1685 chr1  | 85813751  | 85821729  | 0.0343656 | chr1:085815 | 0.0343656 |
| PYY-NAGS    | 1696 chr17 | 39437516  | 39437560  | 0.0344236 | chr17:03943 | 0.0344236 |
| GEM         | 1713 chr8  | 95341363  | 95348607  | 0.0345383 | chr8:095344 | 0.0345383 |
| YIPF6       | 1734 chrX  | 67630921  | 67637933  | 0.0346453 | chrX:067630 | 0.0346453 |
| SLC1A4      | 1736 chr2  | 65065358  | 65072797  | 0.0346482 | chr2:065065 | 0.0346482 |
| FABP3       | 1756 chr1  | 31616130  | 31623972  | 0.0347796 | chr1:031616 | 0.0347796 |
| CBLB        | 1758 chr3  | 107066799 | 107076045 | 0.0347966 | chr3:107070 | 0.0347966 |
| KCTD9-CD1   | 1784 chr8  | 25371927  | 25372430  | 0.0349729 | chr8:025372 | 0.0349729 |
| POU2F1      | 1793 chr1  | 165451317 | 165567586 | 0.0350187 | chr1:165451 | 0.0350187 |
| FLJ32447    | 1818 chr2  | 222866565 | 222871029 | 0.0351663 | chr2:222866 | 0.0351663 |
| CHN2        | 1824 chr7  | 29195644  | 29203305  | 0.0351754 | chr7:029195 | 0.0351754 |
| hsa-mir-210 | 1848 chr11 | 558208    | 566427    | 0.0352907 | chr11:00056 | 0.0352907 |
| TEX10       | 1852 chr9  | 102152691 | 102159422 | 0.0353116 | chr9:102155 | 0.0353116 |
| UPF2        | 1867 chr10 | 12115947  | 12129097  | 0.035394  | chr10:01211 | 0.035394  |
| LRRFIP1     | 1870 chr2  | 238260084 | 238345204 | 0.0354279 | chr2:238260 | 0.0354279 |
| B4GALT6     | 1878 chr18 | 27516375  | 27524047  | 0.0354635 | chr18:02751 | 0.0354635 |
| C2orf19     | 1885 chr2  | 238727093 | 238734860 | 0.0355245 | chr2:238734 | 0.0355245 |
| INSRR-NTF   | 1904 chr1  | 155095320 | 155097278 | 0.0355966 | chr1:155095 | 0.0355966 |
| RFK         | 1923 chr9  | 78197062  | 78204436  | 0.035699  | chr9:078199 | 0.035699  |
| EBNA1BP2    | 1985 chr1  | 43410528  | 43410573  | 0.0361128 | chr1:043410 | 0.0361128 |
| DPH3-OXN    | 1989 chr3  | 16281496  | 16281680  | 0.0361387 | chr3:016281 | 0.0361387 |
| ZNF57       | 1996 chr19 | 2846831   | 2854218   | 0.0361689 | chr19:00284 | 0.0361689 |
| ASAH1       | 1997 chr8  | 17983510  | 17991614  | 0.0361776 | chr8:017986 | 0.0361776 |
| VCPIP1-C8   | 2004 chr8  | 67741987  | 67751019  | 0.0362465 | chr8:067744 | 0.0362465 |
| hsa-mir-219 | 2007 chr6  | 33282714  | 33283663  | 0.0362595 | chr6:033282 | 0.0362595 |

|            |            |           |           |           |            |           |
|------------|------------|-----------|-----------|-----------|------------|-----------|
| FGF2       | 2008 chr4  | 123962465 | 123969701 | 0.0362604 | chr4:12396 | 0.0362604 |
| H2AFZ      | 2024 chr4  | 101088848 | 101095713 | 0.0363552 | chr4:10109 | 0.0363552 |
| SLC5A6     | 2025 chr2  | 27288566  | 27293494  | 0.0363565 | chr2:02728 | 0.0363565 |
| C2orf28    | 2035 chr2  | 27281598  | 27288261  | 0.0364056 | chr2:02728 | 0.0364056 |
| YY1        | 2039 chr14 | 99769669  | 99777724  | 0.0364171 | chr14:0997 | 0.0364171 |
| IFRD2      | 2048 chr3  | 50302594  | 50305134  | 0.0364766 | chr3:05030 | 0.0364766 |
| CENPT-TH   | 2057 chr16 | 66425369  | 66433621  | 0.0365313 | chr16:0664 | 0.0365313 |
| SERINC5    | 2059 chr5  | 79585984  | 79592954  | 0.0365357 | chr5:07958 | 0.0365357 |
| PEX6-PPP2  | 2062 chr6  | 43054864  | 43060205  | 0.036549  | chr6:04305 | 0.036549  |
| CUTL1      | 2075 chr7  | 101240714 | 101250050 | 0.0366217 | chr7:10124 | 0.0366217 |
| CNKSR2     | 2084 chrX  | 21297091  | 21305376  | 0.036682  | chrX:02130 | 0.036682  |
| PCNA-CDS   | 2087 chr20 | 5055272   | 5055449   | 0.0366875 | chr20:0050 | 0.0366875 |
| CPNE2      | 2088 chr16 | 55678541  | 55686508  | 0.0366994 | chr16:0556 | 0.0366994 |
| MGC61571   | 2100 chr3  | 28254879  | 28259500  | 0.0367587 | chr3:02825 | 0.0367587 |
| COG5       | 2104 chr7  | 106991795 | 106994911 | 0.0367726 | chr7:10699 | 0.0367726 |
| FAM122B    | 2105 chrX  | 133755375 | 133758812 | 0.0367813 | chrX:13375 | 0.0367813 |
| TNRC6B     | 2107 chr22 | 38765520  | 38773686  | 0.0367881 | chr22:0387 | 0.0367881 |
| SFRP4-EPI  | 2109 chr7  | 37922955  | 37926680  | 0.0368143 | chr7:03792 | 0.0368143 |
| ZNF689     | 2124 chr16 | 30527745  | 30534369  | 0.0368651 | chr16:0305 | 0.0368651 |
| APBA1      | 2144 chr9  | 71474673  | 71481896  | 0.0370064 | chr9:07147 | 0.0370064 |
| TGFBRAP1   | 2145 chr2  | 105312604 | 105320292 | 0.0370169 | chr2:10531 | 0.0370169 |
| TEX264     | 2195 chr3  | 51674894  | 51713230  | 0.0372534 | chr3:05168 | 0.0372534 |
| CA2        | 2214 chr8  | 86559612  | 86565978  | 0.0373384 | chr8:08656 | 0.0373384 |
| GPR107     | 2215 chr9  | 131855599 | 131858267 | 0.0373713 | chr9:13185 | 0.0373713 |
| MED12L     | 2220 chr3  | 152281521 | 152289788 | 0.0373917 | chr3:15228 | 0.0373917 |
| ZNHIT1     | 2222 chr7  | 100642349 | 100647706 | 0.0373946 | chr7:10064 | 0.0373946 |
| DPYSL4     | 2231 chr10 | 133848432 | 133853020 | 0.037434  | chr10:1338 | 0.037434  |
| MARCKSL1   | 2238 chr1  | 32571907  | 32579916  | 0.0374691 | chr1:03257 | 0.0374691 |
| HMGB3      | 2243 chrX  | 149896974 | 149905034 | 0.0374871 | chrX:14990 | 0.0374871 |
| ZFP161     | 2249 chr18 | 5280856   | 5288825   | 0.037512  | chr18:0052 | 0.037512  |
| PTPLB      | 2253 chr3  | 124784185 | 124790636 | 0.0375407 | chr3:12478 | 0.0375407 |
| STARD3     | 2290 chr17 | 35046384  | 35073127  | 0.0377336 | chr17:0350 | 0.0377336 |
| CREB1      | 2300 chr2  | 208097688 | 208104954 | 0.0377946 | chr2:20810 | 0.0377946 |
| KIN-ATP5C  | 2312 chr10 | 7870037   | 7870081   | 0.0378267 | chr10:0078 | 0.0378267 |
| TP53RK     | 2314 chr20 | 44751699  | 44756706  | 0.0378324 | chr20:0447 | 0.0378324 |
| MAP7       | 2319 chr6  | 136910957 | 136918878 | 0.0378766 | chr6:13691 | 0.0378766 |
| DERA       | 2326 chr12 | 15950644  | 15957989  | 0.0379011 | chr12:0159 | 0.0379011 |
| NGRN       | 2376 chr15 | 88606039  | 88612816  | 0.0381059 | chr15:0886 | 0.0381059 |
| TMEM165    | 2393 chr4  | 55952208  | 55959473  | 0.0382017 | chr4:05595 | 0.0382017 |
| FUCA2      | 2413 chr6  | 143872020 | 143879539 | 0.0382859 | chr6:14387 | 0.0382859 |
| TRMT1-BTE  | 2435 chr19 | 13088312  | 13089953  | 0.0384303 | chr19:0130 | 0.0384303 |
| C1orf125   | 2470 chr1  | 177596634 | 177604169 | 0.038649  | chr1:17760 | 0.038649  |
| RHBDD3-E   | 2493 chr22 | 27993904  | 27994176  | 0.0387292 | chr22:0279 | 0.0387292 |
| HTR1B      | 2501 chr6  | 78227360  | 78235195  | 0.0387664 | chr6:07823 | 0.0387664 |
| TUFT1      | 2511 chr1  | 149777777 | 149779392 | 0.03881   | chr1:14977 | 0.03881   |
| HOP        | 2521 chr4  | 57214456  | 57248117  | 0.0388479 | chr4:05721 | 0.0388479 |
| snR39B     | 2526 chr3  | 187984178 | 187985225 | 0.0388564 | chr3:18798 | 0.0388564 |
| SCML1      | 2543 chrX  | 17664063  | 17667516  | 0.0389306 | chrX:01766 | 0.0389306 |
| MGC11102   | 2553 chr11 | 65526162  | 65527633  | 0.0390174 | chr11:0655 | 0.0390174 |
| CCDC124    | 2571 chr19 | 17903915  | 17910382  | 0.039122  | chr19:0179 | 0.039122  |
| MUC1-hsa-l | 2608 chr1  | 153429374 | 153431516 | 0.0393495 | chr1:15342 | 0.0393495 |
| BAI3       | 2612 chr6  | 69399924  | 69407809  | 0.0393867 | chr6:06940 | 0.0393867 |
| WAC        | 2647 chr10 | 28856551  | 28921271  | 0.0395817 | chr10:0288 | 0.0395817 |
| DBX1       | 2678 chr11 | 20136027  | 20143927  | 0.0397279 | chr11:0201 | 0.0397279 |
| RAB37      | 2681 chr17 | 70176455  | 70255082  | 0.0397373 | chr17:0702 | 0.0397373 |
| ESR1       | 2715 chr6  | 152165020 | 152173090 | 0.03989   | chr6:15217 | 0.03989   |
| MRPL12     | 2718 chr17 | 77280010  | 77284959  | 0.0399072 | chr17:0772 | 0.0399072 |
| PALM2-AK   | 2738 chr9  | 111577145 | 111582408 | 0.039993  | chr9:11158 | 0.039993  |



|             |      |       |           |           |           |             |           |
|-------------|------|-------|-----------|-----------|-----------|-------------|-----------|
| DR1         | 2740 | chr1  | 93578687  | 93587216  | 0.0399987 | chr1:093583 | 0.0399987 |
| MIPEP       | 2744 | chr13 | 23361597  | 23361933  | 0.0400066 | chr13:02336 | 0.0400066 |
| MSX1        | 2758 | chr4  | 4906967   | 4915069   | 0.0401013 | chr4:004911 | 0.0401013 |
| LTB4DH      | 2765 | chr9  | 113399385 | 113406751 | 0.0401238 | chr9:113401 | 0.0401238 |
| IDI1-WDR3   | 2767 | chr10 | 1085220   | 1092709   | 0.0401329 | chr10:00108 | 0.0401329 |
| NPR2        | 2770 | chr9  | 35776711  | 35784908  | 0.0401434 | chr9:03578  | 0.0401434 |
| TRIM62      | 2772 | chr1  | 33417466  | 33424204  | 0.0401471 | chr1:033420 | 0.0401471 |
| SLC35C1     | 2786 | chr11 | 45778842  | 45786275  | 0.0402091 | chr11:04578 | 0.0402091 |
| NAT12       | 2805 | chr14 | 56921936  | 56929542  | 0.0403058 | chr14:05692 | 0.0403058 |
| USP37-RQC   | 2816 | chr2  | 219141337 | 219141904 | 0.040362  | chr2:21914  | 0.040362  |
| ARHGEF1     | 2821 | chr19 | 47077391  | 47082749  | 0.0404047 | chr19:04708 | 0.0404047 |
| BSND        | 2822 | chr1  | 55232448  | 55239906  | 0.0404147 | chr1:055232 | 0.0404147 |
| PLXNA2      | 2839 | chr1  | 206481526 | 206489141 | 0.0404725 | chr1:20648  | 0.0404725 |
| DDX5-CCD    | 2842 | chr17 | 59933062  | 59933636  | 0.0404944 | chr17:05993 | 0.0404944 |
| PLCD3-ACE   | 2850 | chr17 | 40565554  | 40568493  | 0.0405509 | chr17:04056 | 0.0405509 |
| POLR2L-TS   | 2857 | chr11 | 832585    | 832629    | 0.0405847 | chr11:00083 | 0.0405847 |
| GDI2        | 2859 | chr10 | 5892979   | 5900337   | 0.0405967 | chr10:00589 | 0.0405967 |
| FLJ44815-T  | 2860 | chr17 | 29930689  | 29931839  | 0.0406034 | chr17:02993 | 0.0406034 |
| PHF8        | 2861 | chrX  | 54083401  | 54092153  | 0.0406107 | chrX:05408  | 0.0406107 |
| DAG1        | 2911 | chr3  | 49478221  | 49484962  | 0.0408833 | chr3:04948  | 0.0408833 |
| SRGAP1      | 2915 | chr12 | 62519410  | 62527006  | 0.0409176 | chr12:06252 | 0.0409176 |
| KIF6        | 2919 | chr6  | 39798659  | 39806570  | 0.0409389 | chr6:03980  | 0.0409389 |
| DDX50       | 2968 | chr10 | 70325846  | 70332759  | 0.04112   | chr10:07033 | 0.04112   |
| PCDH9       | 2984 | chr13 | 66698123  | 66706030  | 0.0412074 | chr13:06670 | 0.0412074 |
| CXADR       | 3019 | chr21 | 17803331  | 17809265  | 0.0413785 | chr21:01780 | 0.0413785 |
| BUB3        | 3034 | chr10 | 124900211 | 124906800 | 0.0414619 | chr10:12490 | 0.0414619 |
| ZNF555      | 3039 | chr19 | 2787380   | 2794785   | 0.0414812 | chr19:00278 | 0.0414812 |
| OGDH        | 3040 | chr7  | 44607246  | 44613786  | 0.0414915 | chr7:04461  | 0.0414915 |
| DUS4L       | 3054 | chr7  | 106986807 | 107006128 | 0.04154   | chr7:10699  | 0.04154   |
| TMEM15      | 3057 | chr9  | 130746008 | 130755235 | 0.0415599 | chr9:13075  | 0.0415599 |
| EFNB3       | 3063 | chr17 | 7547758   | 7552142   | 0.0415978 | chr17:00754 | 0.0415978 |
| HOXD4       | 3065 | chr2  | 176723507 | 176726977 | 0.0416    | chr2:17672  | 0.0416    |
| C10orf63-TI | 3066 | chr10 | 25345072  | 25345515  | 0.0416043 | chr10:02534 | 0.0416043 |
| RXFP3       | 3075 | chr5  | 33966793  | 33975070  | 0.0416615 | chr5:03397  | 0.0416615 |
| RUSC2       | 3115 | chr9  | 35476044  | 35482529  | 0.0418614 | chr9:03547  | 0.0418614 |
| TRNT1       | 3127 | chr3  | 3142339   | 3145732   | 0.041959  | chr3:00314  | 0.041959  |
| SULF2       | 3129 | chr20 | 45845887  | 45853102  | 0.0419652 | chr20:04584 | 0.0419652 |
| NPHS1-KIR   | 3134 | chr19 | 41035097  | 41039586  | 0.0419793 | chr19:04103 | 0.0419793 |
| FUT7        | 3145 | chr9  | 139044535 | 139050710 | 0.0420115 | chr9:13905  | 0.0420115 |
| UBP1        | 3160 | chr3  | 33454091  | 33458732  | 0.0421008 | chr3:03345  | 0.0421008 |
| SIRT5       | 3169 | chr6  | 13677855  | 13720519  | 0.0421391 | chr6:01368  | 0.0421391 |
| CPT1C       | 3194 | chr19 | 54883711  | 54888361  | 0.0422864 | chr19:05488 | 0.0422864 |
| CCND3       | 3200 | chr6  | 42015122  | 42022406  | 0.0423278 | chr6:04201  | 0.0423278 |
| RTN4RL1-L   | 3215 | chr17 | 1875184   | 1880195   | 0.0423787 | chr17:00187 | 0.0423787 |
| ACSL1       | 3236 | chr4  | 185968722 | 185988640 | 0.0424841 | chr4:18598  | 0.0424841 |
| D15Wsu75e   | 3246 | chr22 | 40346841  | 40347223  | 0.0425373 | chr22:04034 | 0.0425373 |
| BMF         | 3249 | chr15 | 38183186  | 38193752  | 0.0425429 | chr15:03818 | 0.0425429 |
| EIF3S1      | 3266 | chr15 | 42611100  | 42618511  | 0.0426236 | chr15:0426  | 0.0426236 |
| C1orf69     | 3269 | chr1  | 226414773 | 226421161 | 0.0426307 | chr1:22641  | 0.0426307 |
| GRID1       | 3296 | chr10 | 88113713  | 88121661  | 0.0428111 | chr10:08811 | 0.0428111 |
| C20orf23    | 3301 | chr20 | 16499427  | 16507270  | 0.0428266 | chr20:01650 | 0.0428266 |
| UTRN        | 3315 | chr6  | 144649327 | 144657098 | 0.042892  | chr6:14464  | 0.042892  |
| LRAT        | 3323 | chr4  | 155876128 | 155887382 | 0.0429225 | chr4:15588  | 0.0429225 |
| LOC388969   | 3347 | chr2  | 85692776  | 85696732  | 0.0430385 | chr2:08569  | 0.0430385 |
| SLC34A3     | 3355 | chr9  | 139241505 | 139250840 | 0.0430959 | chr9:13924  | 0.0430959 |
| ADRA1D      | 3386 | chr20 | 4175311   | 4183030   | 0.0432472 | chr20:00417 | 0.0432472 |
| SLC25A14    | 3398 | chrX  | 129297195 | 129304437 | 0.0433175 | chrX:12930  | 0.0433175 |
| WDR57-ZC    | 3407 | chr1  | 31542332  | 31542386  | 0.0433569 | chr1:03154  | 0.0433569 |

|             |      |       |           |           |           |             |           |
|-------------|------|-------|-----------|-----------|-----------|-------------|-----------|
| CDYL        | 3409 | chr6  | 4646184   | 4723988   | 0.0433606 | chr6:004720 | 0.0433606 |
| TSSK6-NDU   | 3427 | chr19 | 19487490  | 19487540  | 0.0434288 | chr19:01948 | 0.0434288 |
| NID2        | 3441 | chr14 | 51603172  | 51610255  | 0.0434794 | chr14:05160 | 0.0434794 |
| PSMD2       | 3443 | chr3  | 185493822 | 185502040 | 0.0434829 | chr3:185493 | 0.0434829 |
| HDAC11      | 3490 | chr3  | 13491442  | 13498307  | 0.0437353 | chr3:013490 | 0.0437353 |
| SAFB2-SAF   | 3499 | chr19 | 5574028   | 5574072   | 0.0437973 | chr19:00557 | 0.0437973 |
| SEPT7       | 3506 | chr7  | 35801792  | 35809819  | 0.0438224 | chr7:035801 | 0.0438224 |
| SCARA3      | 3508 | chr8  | 27542756  | 27550115  | 0.0438343 | chr8:027542 | 0.0438343 |
| SETD6       | 3513 | chr16 | 57106464  | 57109342  | 0.0438554 | chr16:05710 | 0.0438554 |
| ANAPC2-S    | 3535 | chr9  | 139202868 | 139202912 | 0.0439862 | chr9:139202 | 0.0439862 |
| TALDO1      | 3537 | chr11 | 732730    | 739882    | 0.043992  | chr11:00073 | 0.043992  |
| CACNA2D2    | 3548 | chr3  | 50513479  | 50521221  | 0.0440479 | chr3:050513 | 0.0440479 |
| EGFR        | 3549 | chr7  | 55050686  | 55056947  | 0.0440509 | chr7:055050 | 0.0440509 |
| TIP39       | 3552 | chr19 | 54616109  | 54623999  | 0.0440738 | chr19:05461 | 0.0440738 |
| ENAH        | 3558 | chr1  | 223904827 | 223912726 | 0.0441111 | chr1:223904 | 0.0441111 |
| ACTN1       | 3559 | chr14 | 68513326  | 68520964  | 0.044112  | chr14:06851 | 0.044112  |
| ONECUT1     | 3562 | chr15 | 50866922  | 50874923  | 0.0441311 | chr15:05086 | 0.0441311 |
| PLCB2       | 3579 | chr15 | 38384871  | 38392860  | 0.0442288 | chr15:03838 | 0.0442288 |
| PSMB2       | 3587 | chr1  | 35877610  | 35883913  | 0.0442655 | chr1:035877 | 0.0442655 |
| HMGCR       | 3593 | chr5  | 74663414  | 74670816  | 0.0443096 | chr5:074666 | 0.0443096 |
| TMUB2       | 3596 | chr17 | 39619862  | 39624331  | 0.0443223 | chr17:03961 | 0.0443223 |
| DBNDD1      | 3599 | chr16 | 88601392  | 88613288  | 0.0443312 | chr16:08860 | 0.0443312 |
| SDF2L1      | 3610 | chr22 | 20323738  | 20328431  | 0.0443868 | chr22:02032 | 0.0443868 |
| SMAD3       | 3613 | chr15 | 65141598  | 65148059  | 0.0443917 | chr15:06514 | 0.0443917 |
| DKFZP564    | 3640 | chr11 | 63195788  | 63205359  | 0.0444969 | chr11:06319 | 0.0444969 |
| NODAL       | 3642 | chr10 | 71869171  | 71876785  | 0.0445038 | chr10:07186 | 0.0445038 |
| MST4        | 3645 | chrX  | 130979524 | 130987797 | 0.0445117 | chrX:130979 | 0.0445117 |
| RIPK4       | 3655 | chr21 | 42057750  | 42065793  | 0.0445621 | chr21:04205 | 0.0445621 |
| STCH        | 3665 | chr21 | 14675341  | 14680927  | 0.0446471 | chr21:01467 | 0.0446471 |
| C20orf30    | 3678 | chr20 | 5039334   | 5043628   | 0.0446918 | chr20:00503 | 0.0446918 |
| SND1        | 3679 | chr7  | 127073949 | 127427454 | 0.0446966 | chr7:127073 | 0.0446966 |
| IQCB1-EAF   | 3697 | chr3  | 123036633 | 123036677 | 0.0447906 | chr3:123036 | 0.0447906 |
| ASPM        | 3700 | chr1  | 195379838 | 195384274 | 0.0448008 | chr1:195382 | 0.0448008 |
| CSPG4-OD    | 3702 | chr15 | 73796944  | 73802086  | 0.0448046 | chr15:07380 | 0.0448046 |
| KLF7        | 3711 | chr2  | 207736313 | 207742506 | 0.0448414 | chr2:207736 | 0.0448414 |
| KCND3       | 3717 | chr1  | 112330996 | 112338351 | 0.0448555 | chr1:112333 | 0.0448555 |
| hsa-mir-424 | 3718 | chrX  | 133508345 | 133513895 | 0.0448704 | chrX:133511 | 0.0448704 |
| MTERFD1-I   | 3719 | chr8  | 97343025  | 97343324  | 0.0448711 | chr8:097343 | 0.0448711 |
| PKD1-RAB2   | 3727 | chr16 | 2128691   | 2135871   | 0.0449223 | chr16:00212 | 0.0449223 |
| OVCA2       | 3736 | chr17 | 1882047   | 1893965   | 0.0449788 | chr17:00188 | 0.0449788 |
| LONP1-TMI   | 3749 | chr19 | 5671244   | 5671602   | 0.0450694 | chr19:00567 | 0.0450694 |
| PTPRZ1      | 3751 | chr7  | 121295374 | 121303116 | 0.0450762 | chr7:121303 | 0.0450762 |
| SNAI2       | 3752 | chr8  | 49993851  | 50001972  | 0.0450806 | chr8:049993 | 0.0450806 |
| PPP2R2B     | 3754 | chr5  | 146235558 | 146421236 | 0.0450868 | chr5:146235 | 0.0450868 |
| EIF4ENIF1-  | 3757 | chr22 | 30215927  | 30222100  | 0.0451373 | chr22:03021 | 0.0451373 |
| PPID        | 3764 | chr4  | 159861722 | 159869437 | 0.0451788 | chr4:159861 | 0.0451788 |
| RPP40       | 3765 | chr6  | 4947068   | 4954619   | 0.0451812 | chr6:004947 | 0.0451812 |
| STRN3       | 3769 | chr14 | 30565440  | 30570855  | 0.0451996 | chr14:03056 | 0.0451996 |
| ANKRD16-f   | 3791 | chr10 | 5971489   | 5972230   | 0.0452991 | chr10:00597 | 0.0452991 |
| ITIH5       | 3799 | chr10 | 7746675   | 7754423   | 0.0453396 | chr10:00774 | 0.0453396 |
| KDEL2       | 3803 | chr7  | 6487962   | 6493173   | 0.0453499 | chr7:006493 | 0.0453499 |
| CC2D1B      | 3804 | chr1  | 52596025  | 52609194  | 0.0453597 | chr1:052596 | 0.0453597 |
| ILKAP       | 3821 | chr2  | 238774495 | 238777550 | 0.0454611 | chr2:238777 | 0.0454611 |
| ABHD14B-f   | 3822 | chr3  | 51983061  | 51984118  | 0.0454634 | chr3:051983 | 0.0454634 |
| SREBF2      | 3824 | chr22 | 40553716  | 40629229  | 0.0454765 | chr22:04055 | 0.0454765 |
| POLG        | 3828 | chr15 | 87676581  | 87684225  | 0.045486  | chr15:08767 | 0.045486  |
| FUBP3       | 3831 | chr9  | 132440030 | 132447365 | 0.0454992 | chr9:132444 | 0.0454992 |
| MPDU1       | 3843 | chr17 | 7426364   | 7432162   | 0.0455806 | chr17:00742 | 0.0455806 |

|            |            |           |           |           |             |           |
|------------|------------|-----------|-----------|-----------|-------------|-----------|
| SENP6      | 3855 chr6  | 76362862  | 76370712  | 0.0456487 | chr6:076368 | 0.0456487 |
| EIF4E3-GPI | 3864 chr3  | 71885617  | 71885910  | 0.0456836 | chr3:071888 | 0.0456836 |
| ZNF148     | 3867 chr3  | 126574548 | 126582360 | 0.0456966 | chr3:126571 | 0.0456966 |
| GBA2       | 3875 chr9  | 35739382  | 35742779  | 0.0457482 | chr9:035739 | 0.0457482 |
| KCNB1      | 3888 chr20 | 47529960  | 47537421  | 0.0457969 | chr20:0475  | 0.0457969 |
| CEP63      | 3892 chr3  | 135681811 | 135691051 | 0.0458388 | chr3:135681 | 0.0458388 |
| ADCK4-ITP  | 3932 chr19 | 45914502  | 45914754  | 0.0460411 | chr19:0459  | 0.0460411 |
| NUDT6      | 3953 chr4  | 124058274 | 124063450 | 0.0461309 | chr4:12406  | 0.0461309 |
| TSC22D1    | 3967 chr13 | 43906377  | 44054200  | 0.0462322 | chr13:0439  | 0.0462322 |
| ITFG1-PHK  | 3976 chr16 | 46052584  | 46052628  | 0.0463086 | chr16:0460  | 0.0463086 |
| RASGRP1    | 3986 chr15 | 36641794  | 36647088  | 0.0463595 | chr15:0366  | 0.0463595 |
| NDUFA11-V  | 3993 chr19 | 5855088   | 5855802   | 0.0464077 | chr19:0058  | 0.0464077 |
| FAM104A-C  | 3995 chr17 | 68740037  | 68740827  | 0.0464207 | chr17:0687  | 0.0464207 |
| CA13       | 4001 chr8  | 86344103  | 86347624  | 0.0464534 | chr8:08634  | 0.0464534 |
| TCEB1-TM   | 4005 chr8  | 75047124  | 75050780  | 0.0464773 | chr8:07504  | 0.0464773 |
| CDC42BPB   | 4008 chr14 | 102591110 | 102598603 | 0.0464859 | chr14:1025  | 0.0464859 |
| SPG7       | 4019 chr16 | 88098030  | 88151691  | 0.046534  | chr16:0881  | 0.046534  |
| VGLL3      | 4032 chr3  | 87120644  | 87128306  | 0.0466026 | chr3:08712  | 0.0466026 |
| SSTR5      | 4052 chr16 | 1063352   | 1071361   | 0.0466804 | chr16:0010  | 0.0466804 |
| PCDH8      | 4055 chr13 | 52318306  | 52325848  | 0.0467103 | chr13:0523  | 0.0467103 |
| TFAP2C     | 4063 chr20 | 54632708  | 54640470  | 0.0467652 | chr20:0546  | 0.0467652 |
| NEUROD2    | 4073 chr17 | 35015186  | 35023120  | 0.0467889 | chr17:0350  | 0.0467889 |
| METTL9     | 4078 chr16 | 21514677  | 21576924  | 0.0468055 | chr16:0215  | 0.0468055 |
| ZNF436-C1  | 4092 chr1  | 23567524  | 23568010  | 0.0468585 | chr1:02356  | 0.0468585 |
| ACA48      | 4100 chr17 | 7416899   | 7418756   | 0.0468871 | chr17:0074  | 0.0468871 |
| CXCL2      | 4104 chr4  | 75181533  | 75189235  | 0.0469081 | chr4:07518  | 0.0469081 |
| EVI1       | 4111 chr3  | 170344352 | 170352485 | 0.0469388 | chr3:17034  | 0.0469388 |
| BRD9       | 4112 chr5  | 940713    | 945916    | 0.0469419 | chr5:00094  | 0.0469419 |
| PTK6       | 4130 chr20 | 61636740  | 61642285  | 0.0470445 | chr20:0616  | 0.0470445 |
| TEX14-RAC  | 4136 chr17 | 54124441  | 54124824  | 0.0470751 | chr17:0541  | 0.0470751 |
| MYLK       | 4149 chr3  | 125083556 | 125089990 | 0.0471135 | chr3:12508  | 0.0471135 |
| TA-NFKBH-  | 4168 chr19 | 41083469  | 41084158  | 0.0472366 | chr19:0410  | 0.0472366 |
| CHES1      | 4183 chr14 | 88691136  | 88957132  | 0.0473131 | chr14:0889  | 0.0473131 |
| ITGB1BP3   | 4189 chr19 | 3879413   | 3885550   | 0.0473374 | chr19:0038  | 0.0473374 |
| FMNL2      | 4192 chr2  | 152894915 | 152902673 | 0.0473461 | chr2:15289  | 0.0473461 |
| IL28A      | 4205 chr19 | 44446309  | 44453165  | 0.0474349 | chr19:0444  | 0.0474349 |
| M6PR       | 4218 chr12 | 8991127   | 8996104   | 0.0475157 | chr12:0089  | 0.0475157 |
| CDKL3-UB   | 4228 chr5  | 133730159 | 133734670 | 0.0475547 | chr5:13373  | 0.0475547 |
| C14orf149- | 4232 chr14 | 59020904  | 59020948  | 0.0475853 | chr14:0590  | 0.0475853 |
| IRAK3      | 4238 chr12 | 64868025  | 64871753  | 0.047604  | chr12:0648  | 0.047604  |
| GFPT1      | 4256 chr2  | 69465584  | 69473181  | 0.0476914 | chr2:06946  | 0.0476914 |
| MAD1L1     | 4268 chr7  | 2234059   | 2240477   | 0.0477441 | chr7:00223  | 0.0477441 |
| AQP11      | 4270 chr11 | 76975408  | 76981190  | 0.0477587 | chr11:0769  | 0.0477587 |
| DCBLD2     | 4278 chr3  | 100100397 | 100108694 | 0.0478257 | chr3:10010  | 0.0478257 |
| CBLN3-KIA  | 4283 chr14 | 23968733  | 23969028  | 0.0478459 | chr14:0239  | 0.0478459 |
| LPIN1      | 4306 chr2  | 11798825  | 11806689  | 0.0479557 | chr2:01180  | 0.0479557 |
| PELO       | 4313 chr5  | 52114055  | 52134104  | 0.0479781 | chr5:05211  | 0.0479781 |
| ERLIN1     | 4315 chr10 | 101933015 | 101938127 | 0.0479811 | chr10:1019  | 0.0479811 |
| KCNK10     | 4316 chr14 | 87804897  | 87868432  | 0.0479826 | chr14:0878  | 0.0479826 |
| FLJ22662   | 4319 chr12 | 14609936  | 14617574  | 0.0480087 | chr12:0146  | 0.0480087 |
| CFL1-MUS   | 4326 chr11 | 65382443  | 65384492  | 0.0480396 | chr11:0653  | 0.0480396 |
| AUH        | 4345 chr9  | 93161494  | 93169532  | 0.048165  | chr9:09316  | 0.048165  |
| MTERF      | 4346 chr7  | 91345444  | 91352620  | 0.0481659 | chr7:09134  | 0.0481659 |
| RHEB       | 4356 chr7  | 150845548 | 150852640 | 0.0482079 | chr7:15084  | 0.0482079 |
| SLC44A5    | 4370 chr1  | 75847507  | 75854814  | 0.0482777 | chr1:07585  | 0.0482777 |
| PAX6       | 4371 chr11 | 31787054  | 31794909  | 0.0482817 | chr11:0317  | 0.0482817 |
| TGFBR1     | 4378 chr9  | 100903767 | 100909753 | 0.0483477 | chr9:10090  | 0.0483477 |
| PTPN9      | 4401 chr15 | 73656287  | 73663773  | 0.0484713 | chr15:0736  | 0.0484713 |

|             |      |       |           |           |           |                           |           |
|-------------|------|-------|-----------|-----------|-----------|---------------------------|-----------|
| TRIM24      | 4408 | chr7  | 137791390 | 137797164 | 0.0484961 | chr7:137791390-137797164  | 0.0484961 |
| ATF4        | 4420 | chr22 | 38244221  | 38249419  | 0.0485853 | chr22:38244221-38249419   | 0.0485853 |
| RNPC3       | 4435 | chr1  | 103835693 | 103843730 | 0.0486856 | chr1:103835693-103843730  | 0.0486856 |
| MAN1B1      | 4436 | chr9  | 139098926 | 139103688 | 0.0486893 | chr9:139098926-139103688  | 0.0486893 |
| RNASEN-C    | 4439 | chr5  | 31568049  | 31568093  | 0.0487042 | chr5:31568049-31568093    | 0.0487042 |
| RNF4        | 4441 | chr4  | 2435321   | 2441912   | 0.048709  | chr4:2435321-2441912      | 0.048709  |
| OTP         | 4442 | chr5  | 76967666  | 76975767  | 0.0487115 | chr5:76967666-76975767    | 0.0487115 |
| ST18        | 4444 | chr8  | 53482535  | 53490313  | 0.04872   | chr8:53482535-53490313    | 0.04872   |
| OSR2        | 4449 | chr8  | 100020477 | 100028281 | 0.0487459 | chr8:100020477-100028281  | 0.0487459 |
| ETF1        | 4457 | chr5  | 137904206 | 137912263 | 0.0487709 | chr5:137904206-137912263  | 0.0487709 |
| NDUFB7      | 4465 | chr19 | 14542993  | 14544283  | 0.0488107 | chr19:14542993-14544283   | 0.0488107 |
| HPS5-GTF2   | 4484 | chr11 | 18300343  | 18300710  | 0.0488985 | chr11:18300343-18300710   | 0.0488985 |
| FAM3A       | 4501 | chrX  | 153396922 | 153401502 | 0.0489882 | chrX:153396922-153401502  | 0.0489882 |
| C22orf32    | 4509 | chr22 | 40805605  | 40808105  | 0.0490314 | chr22:40805605-40808105   | 0.0490314 |
| NME6        | 4536 | chr3  | 48315331  | 48323328  | 0.0491724 | chr3:48315331-48323328    | 0.0491724 |
| PTEN        | 4538 | chr10 | 89608145  | 89615815  | 0.0491793 | chr10:89608145-89615815   | 0.0491793 |
| CXXC1       | 4545 | chr18 | 46062697  | 46073371  | 0.0491982 | chr18:46062697-46073371   | 0.0491982 |
| PLK1        | 4549 | chr16 | 23592287  | 23600069  | 0.0492446 | chr16:23592287-23600069   | 0.0492446 |
| DHX36       | 4550 | chr3  | 155522603 | 155526544 | 0.0492542 | chr3:155522603-155526544  | 0.0492542 |
| ERBB2       | 4557 | chr17 | 35097985  | 35138346  | 0.0492886 | chr17:35097985-35138346   | 0.0492886 |
| RASGRF1     | 4606 | chr15 | 77167985  | 77175422  | 0.049561  | chr15:77167985-77175422   | 0.049561  |
| SIAH2       | 4625 | chr3  | 151960816 | 151968943 | 0.0496394 | chr3:151960816-151968943  | 0.0496394 |
| ACR         | 4633 | chr22 | 49518500  | 49525847  | 0.0496824 | chr22:49518500-49525847   | 0.0496824 |
| hsa-mir-34c | 4642 | chr11 | 110889010 | 110889387 | 0.0497372 | chr11:110889010-110889387 | 0.0497372 |
| NXF1        | 4652 | chr11 | 62326962  | 62330874  | 0.0497764 | chr11:62326962-62330874   | 0.0497764 |
| ZNF345      | 4677 | chr19 | 42031312  | 42034839  | 0.0499423 | chr19:42031312-42034839   | 0.0499423 |
| DUSP6       | 4686 | chr12 | 88267527  | 88275916  | 0.0499806 | chr12:88267527-88275916   | 0.0499806 |

### HPSE- bound genes (5'-transcribe region)

### NS subset (100 genes)

| Gene     | Rank (Hep-I) | Chromosome | Start     | End       | Min P(Xbar) | Probe                     | P(Xbar)   |
|----------|--------------|------------|-----------|-----------|-------------|---------------------------|-----------|
| RABL3    | 194          | chr3       | 121941663 | 121943969 | 0.0131583   | chr3:121941663-121943969  | 0.0131583 |
| TMEM142C | 232          | chr16      | 30862929  | 30873749  | 0.0136866   | chr16:30862929-30873749   | 0.0136866 |
| CCDC53   | 243          | chr12      | 100977458 | 100985326 | 0.0138668   | chr12:100977458-100985326 | 0.0138668 |
| RAB33A   | 551          | chrX       | 129133458 | 129136232 | 0.0176868   | chrX:129133458-129136232  | 0.0176868 |
| C20orf39 | 578          | chr20      | 24392389  | 24400779  | 0.0180102   | chr20:24392389-24400779   | 0.0180102 |
| MOSPD1   | 608          | chrX       | 133875079 | 133882371 | 0.0183136   | chrX:133875079-133882371  | 0.0183136 |
| UQCRB    | 638          | chr8       | 97314630  | 97320808  | 0.0185489   | chr8:97314630-97320808    | 0.0185489 |
| LRRC42   | 698          | chr1       | 54184671  | 54189370  | 0.0190989   | chr1:54184671-54189370    | 0.0190989 |
| UTY      | 732          | chrY       | 14098734  | 14104150  | 0.0193509   | chrY:14098734-14104150    | 0.0193509 |
| LDB3     | 775          | chr10      | 88416321  | 88420857  | 0.019742    | chr10:88416321-88420857   | 0.019742  |
| PSMC2    | 820          | chr7       | 102775432 | 102777878 | 0.0200681   | chr7:102775432-102777878  | 0.0200681 |
| NAG6     | 851          | chr7       | 128214160 | 128221780 | 0.0202909   | chr7:128214160-128221780  | 0.0202909 |
| DGCR13   | 884          | chr22      | 17500292  | 17501269  | 0.0206036   | chr22:17500292-17501269   | 0.0206036 |
| ADD3     | 984          | chr10      | 111750282 | 111760154 | 0.0213032   | chr10:111750282-111760154 | 0.0213032 |
| MSN      | 1135         | chrX       | 64801280  | 64806845  | 0.0223784   | chrX:64801280-64806845    | 0.0223784 |
| PNMT     | 1200         | chr17      | 35076410  | 35080409  | 0.0227792   | chr17:35076410-35080409   | 0.0227792 |
| KIRREL   | 1224         | chr1       | 156224278 | 156232618 | 0.0229067   | chr1:156224278-156232618  | 0.0229067 |
| BCAM     | 1229         | chr19      | 49998983  | 50006427  | 0.0229344   | chr19:49998983-50006427   | 0.0229344 |
| FGFBP2   | 1249         | chr4       | 15572077  | 15579453  | 0.023057    | chr4:15572077-15579453    | 0.023057  |
| KIAA0913 | 1271         | chr10      | 75215413  | 75224569  | 0.0231757   | chr10:75215413-75224569   | 0.0231757 |
| RBM18    | 1279         | chr9       | 124061614 | 124066800 | 0.023246    | chr9:124061614-124066800  | 0.023246  |
| CACNG8   | 1293         | chr19      | 59152587  | 59160526  | 0.0233191   | chr19:59152587-59160526   | 0.0233191 |
| ITFG2    | 1312         | chr12      | 2786772   | 2793831   | 0.0234413   | chr12:2786772-2793831     | 0.0234413 |
| PRKCSH   | 1323         | chr19      | 11407279  | 11410038  | 0.0235337   | chr19:11407279-11410038   | 0.0235337 |
| TSHR     | 1347         | chr14      | 80490879  | 80494120  | 0.0237409   | chr14:80490879-80494120   | 0.0237409 |
| FAM84A   | 1367         | chr2       | 14684767  | 14693940  | 0.0238935   | chr2:14684767-14693940    | 0.0238935 |
| RNASEH2C | 1512         | chr11      | 65242363  | 65246854  | 0.0247987   | chr11:65242363-65246854   | 0.0247987 |

|          |            |           |           |           |             |           |
|----------|------------|-----------|-----------|-----------|-------------|-----------|
| ZFP95    | 1551 chr7  | 98940248  | 98942735  | 0.0250142 | chr7:098942 | 0.0250142 |
| SCN1B    | 1587 chr19 | 40209265  | 40223178  | 0.0252677 | chr19:0402  | 0.0252677 |
| SIRPA    | 1662 chr20 | 1817846   | 1826500   | 0.0257116 | chr20:00182 | 0.0257116 |
| CYP2F1   | 1796 chr19 | 46309723  | 46314592  | 0.0264738 | chr19:0463  | 0.0264738 |
| ZC3H7B   | 1850 chr22 | 40025525  | 40034265  | 0.0267762 | chr22:0400  | 0.0267762 |
| NONO     | 1859 chrX  | 70416859  | 70436996  | 0.0267952 | chrX:07042  | 0.0267952 |
| SLC27A3  | 1951 chr1  | 152013401 | 152016916 | 0.0273141 | chr1:15201  | 0.0273141 |
| VSIG2    | 1961 chr11 | 124124814 | 124128133 | 0.0274094 | chr11:1241  | 0.0274094 |
| BECN1    | 2001 chr17 | 38229369  | 38229820  | 0.0275957 | chr17:0382  | 0.0275957 |
| EVI5L    | 2029 chr19 | 7798292   | 7819921   | 0.027703  | chr19:0078  | 0.027703  |
| ITPR3    | 2070 chr6  | 33693965  | 33699729  | 0.0279564 | chr6:03369  | 0.0279564 |
| PNPLA7   | 2113 chr9  | 139560799 | 139564633 | 0.0281454 | chr9:13956  | 0.0281454 |
| CDC27    | 2149 chr17 | 42619272  | 42626997  | 0.0283855 | chr17:0426  | 0.0283855 |
| TNFSF15  | 2205 chr9  | 116606453 | 116613454 | 0.0286714 | chr9:11660  | 0.0286714 |
| RILP     | 2212 chr17 | 1496444   | 1500660   | 0.0287055 | chr17:0015  | 0.0287055 |
| CCDC27   | 2248 chr1  | 3658981   | 3661351   | 0.0289538 | chr1:00365  | 0.0289538 |
| ARHGDI6  | 2252 chr16 | 270714    | 272999    | 0.0289854 | chr16:0002  | 0.0289854 |
| HPD      | 2308 chr12 | 120778720 | 120782957 | 0.0293536 | chr12:1207  | 0.0293536 |
| RNF165   | 2336 chr18 | 42163009  | 42171113  | 0.0294951 | chr18:0421  | 0.0294951 |
| RPL35A   | 2408 chr3  | 199156177 | 199166524 | 0.0299575 | chr3:19916  | 0.0299575 |
| CYorf15A | 2411 chrY  | 20183254  | 20211425  | 0.0299761 | chrY:02018  | 0.0299761 |
| C3       | 2521 chr19 | 6669274   | 6676663   | 0.0305816 | chr19:0066  | 0.0305816 |
| RBM5     | 2526 chr3  | 50095993  | 50103745  | 0.0306439 | chr3:05010  | 0.0306439 |
| ARHGDI8  | 2549 chr12 | 14986225  | 15007082  | 0.0307579 | chr12:0150  | 0.0307579 |
| SLC10A3  | 2565 chrX  | 153368815 | 153375386 | 0.0308347 | chrX:15337  | 0.0308347 |
| RCE1     | 2651 chr11 | 66367440  | 66369970  | 0.0312845 | chr11:0663  | 0.0312845 |
| SLC22A6  | 2764 chr11 | 62506377  | 62514349  | 0.0318842 | chr11:0625  | 0.0318842 |
| MAFF     | 2794 chr22 | 36924605  | 36942023  | 0.0319484 | chr22:0369  | 0.0319484 |
| WNT10B   | 2807 chr12 | 47648245  | 47651753  | 0.0320499 | chr12:0476  | 0.0320499 |
| PUNC     | 2817 chr15 | 63454809  | 63460840  | 0.0320821 | chr15:0634  | 0.0320821 |
| SERPINA1 | 2868 chr14 | 93922196  | 93932250  | 0.0324559 | chr14:0939  | 0.0324559 |
| PF4V1    | 2871 chr4  | 74932557  | 74940337  | 0.0324686 | chr4:07493  | 0.0324686 |
| ZBTB32   | 2924 chr19 | 40890773  | 40899768  | 0.0326902 | chr19:0408  | 0.0326902 |
| CXorf43  | 2946 chrX  | 83641671  | 83649590  | 0.0328189 | chrX:08364  | 0.0328189 |
| RNF13    | 2947 chr3  | 151010339 | 151016197 | 0.0328249 | chr3:15101  | 0.0328249 |
| PPHLN1   | 2948 chr12 | 41006292  | 41011708  | 0.0328265 | chr12:0410  | 0.0328265 |
| ARRB1    | 3118 chr11 | 74722000  | 74745754  | 0.0335802 | chr11:0747  | 0.0335802 |
| P2RY8    | 3131 chrY  | 1613682   | 1621497   | 0.0336432 | chrY:00161  | 0.0336432 |
| CDCA5    | 3192 chr11 | 64602889  | 64607960  | 0.0340215 | chr11:0646  | 0.0340215 |
| SGEF     | 3256 chr3  | 155316443 | 155324331 | 0.0343151 | chr3:15532  | 0.0343151 |
| DPH1     | 3264 chr17 | 1880270   | 1880956   | 0.0343446 | chr17:0018  | 0.0343446 |
| COL9A3   | 3271 chr20 | 60916036  | 60921362  | 0.0343821 | chr20:0609  | 0.0343821 |
| ADCYAP1  | 3278 chr18 | 889825    | 897830    | 0.0344281 | chr18:0008  | 0.0344281 |
| PHB      | 3287 chr17 | 44845048  | 44847769  | 0.0344737 | chr17:0448  | 0.0344737 |
| ARSA     | 3363 chr22 | 49410551  | 49414418  | 0.0348477 | chr22:0494  | 0.0348477 |
| ZNF446   | 3422 chr19 | 63676598  | 63682889  | 0.0351338 | chr19:0636  | 0.0351338 |
| ASB18    | 3457 chr2  | 236812686 | 236820469 | 0.0353252 | chr2:23681  | 0.0353252 |
| PGF      | 3492 chr14 | 74489491  | 74497571  | 0.0355211 | chr14:0744  | 0.0355211 |
| BAT3     | 3588 chr6  | 31725146  | 31728240  | 0.0360355 | chr6:03172  | 0.0360355 |
| HOXB6    | 3668 chr17 | 44028219  | 44039612  | 0.0364593 | chr17:0440  | 0.0364593 |
| PRSS36   | 3717 chr16 | 31057912  | 31073511  | 0.0366747 | chr16:0310  | 0.0366747 |
| STXBP1   | 3774 chr9  | 129408984 | 129416697 | 0.0369701 | chr9:12941  | 0.0369701 |
| OXA1L    | 3949 chr14 | 22305556  | 22307605  | 0.0378849 | chr14:0223  | 0.0378849 |
| TMEM2    | 4028 chr9  | 73571241  | 73578636  | 0.0383527 | chr9:07357  | 0.0383527 |
| F25965   | 4039 chr19 | 40929836  | 40937219  | 0.0383862 | chr19:0409  | 0.0383862 |
| KIAA0101 | 4094 chr15 | 62459094  | 62460637  | 0.0386766 | chr15:0624  | 0.0386766 |
| MT1E     | 4121 chr16 | 55212181  | 55217482  | 0.0387954 | chr16:0552  | 0.0387954 |
| ZH2C2    | 4141 chr5  | 102481818 | 102483722 | 0.0389121 | chr5:10248  | 0.0389121 |

|        |      |       |           |           |           |             |           |
|--------|------|-------|-----------|-----------|-----------|-------------|-----------|
| THAP6  | 4283 | chr4  | 76658729  | 76662473  | 0.0397759 | chr4:076658 | 0.0397759 |
| TMEM95 | 4320 | chr17 | 7198961   | 7201259   | 0.0399539 | chr17:00719 | 0.0399539 |
| AOC2   | 4468 | chr17 | 38249314  | 38255976  | 0.0407488 | chr17:03824 | 0.0407488 |
| ITGBL1 | 4520 | chr13 | 100898340 | 100905658 | 0.0410757 | chr13:10090 | 0.0410757 |
| ASPHD1 | 4544 | chr16 | 29819839  | 29823504  | 0.0412373 | chr16:02981 | 0.0412373 |
| ARID3B | 4743 | chr15 | 72615309  | 72623120  | 0.0423016 | chr15:07261 | 0.0423016 |
| XRCC3  | 4753 | chr14 | 103247091 | 103251348 | 0.0423582 | chr14:10324 | 0.0423582 |
| NDUFB8 | 4764 | chr10 | 102273469 | 102279638 | 0.042423  | chr10:10227 | 0.042423  |
| TMEM49 | 4821 | chr17 | 55139863  | 55273111  | 0.0427525 | chr17:05526 | 0.0427525 |
| NDUFA7 | 5104 | chr19 | 8282386   | 8292263   | 0.044462  | chr19:00828 | 0.044462  |
| ARR3   | 5211 | chrX  | 69404923  | 69407099  | 0.0450598 | chrX:06940  | 0.0450598 |
| ARMC7  | 5390 | chr17 | 70613849  | 70637946  | 0.0461866 | chr17:07061 | 0.0461866 |
| ACRC   | 5442 | chrX  | 70712439  | 70717514  | 0.0465361 | chrX:07071  | 0.0465361 |
| BIVM   | 5503 | chr13 | 102249491 | 102291867 | 0.0468649 | chr13:10224 | 0.0468649 |
| CNGA4  | 5694 | chr11 | 6217007   | 6217792   | 0.0481682 | chr11:00621 | 0.0481682 |

### HPSE- bound genes (5'-transcribe region)

### NS and ST subset (1636 g

| Gene      | Rank (Hep- | Chromosome | Start     | End       | Min P(Xbar) | Probe       | P(Xbar)   |
|-----------|------------|------------|-----------|-----------|-------------|-------------|-----------|
| TCF7L1    | 2          | chr2       | 85210668  | 85216848  | 0.0116767   | chr2:085214 | 0.0116767 |
| KLHL9     | 8          | chr9       | 21322492  | 21330561  | 0.0140998   | chr9:021322 | 0.0140998 |
| KCNJ3     | 10         | chr2       | 155258009 | 155266054 | 0.0141896   | chr2:155266 | 0.0141896 |
| MTR       | 11         | chr1       | 235020572 | 235028125 | 0.0142119   | chr1:235020 | 0.0142119 |
| DMRTA1    | 12         | chr9       | 22434616  | 22439381  | 0.0143869   | chr9:022437 | 0.0143869 |
| FAM84B    | 13         | chr8       | 127636475 | 127645178 | 0.0144173   | chr8:127636 | 0.0144173 |
| EPB41L4B  | 14         | chr9       | 111120375 | 111127549 | 0.0145209   | chr9:111121 | 0.0145209 |
| UAP1      | 15         | chr1       | 160793015 | 160800415 | 0.0148367   | chr1:160797 | 0.0148367 |
| NFIA      | 17         | chr1       | 61315237  | 61323540  | 0.0149073   | chr1:061323 | 0.0149073 |
| LAMB1     | 18         | chr7       | 107428078 | 107436245 | 0.0150184   | chr7:107430 | 0.0150184 |
| TRIM41    | 19         | chr5       | 180577481 | 180585626 | 0.0150715   | chr5:180585 | 0.0150715 |
| C1orf63   | 21         | chr1       | 25443569  | 25451436  | 0.0152483   | chr1:025444 | 0.0152483 |
| HCN1      | 22         | chr5       | 45729667  | 45737448  | 0.0153259   | chr5:045730 | 0.0153259 |
| SURF1     | 24         | chr9       | 135208455 | 135212884 | 0.0154692   | chr9:135208 | 0.0154692 |
| BASP1     | 25         | chr5       | 17266367  | 17276009  | 0.0154919   | chr5:017272 | 0.0154919 |
| RUFY1     | 27         | chr5       | 178907545 | 178922080 | 0.0155896   | chr5:178919 | 0.0155896 |
| PITX1     | 29         | chr5       | 134395093 | 134403698 | 0.0157631   | chr5:134396 | 0.0157631 |
| HES3      | 31         | chr1       | 6226304   | 6229490   | 0.0159196   | chr1:006226 | 0.0159196 |
| GNB2      | 32         | chr7       | 100105742 | 100111881 | 0.0159318   | chr7:100110 | 0.0159318 |
| ARHGEF3   | 36         | chr3       | 56808578  | 56816484  | 0.015994    | chr3:056810 | 0.015994  |
| GFPT2     | 37         | chr5       | 179710426 | 179718156 | 0.0160698   | chr5:179711 | 0.0160698 |
| LPHN2     | 40         | chr1       | 82033244  | 82041119  | 0.0164591   | chr1:082040 | 0.0164591 |
| OTOF      | 41         | chr2       | 26551726  | 26640328  | 0.0165706   | chr2:026555 | 0.0165706 |
| G3BP2     | 44         | chr4       | 76815173  | 76821973  | 0.0167592   | chr4:076816 | 0.0167592 |
| DNPEP     | 45         | chr2       | 219958495 | 219965250 | 0.0167601   | chr2:219960 | 0.0167601 |
| MLF1      | 46         | chr3       | 159766290 | 159774263 | 0.0168435   | chr3:159777 | 0.0168435 |
| DDAH2     | 47         | chr6       | 31802519  | 31806268  | 0.0168639   | chr6:031800 | 0.0168639 |
| TTPA      | 48         | chr8       | 64159755  | 64164876  | 0.017068    | chr8:064160 | 0.017068  |
| SOHLH1    | 50         | chr9       | 137728351 | 137731152 | 0.0171472   | chr9:137729 | 0.0171472 |
| FAM43B    | 51         | chr1       | 20747574  | 20754521  | 0.017157    | chr1:020755 | 0.017157  |
| GBX2      | 52         | chr2       | 236738888 | 236746869 | 0.0172486   | chr2:236747 | 0.0172486 |
| THADA     | 53         | chr2       | 43675957  | 43678413  | 0.0172961   | chr2:043676 | 0.0172961 |
| UPP1      | 54         | chr7       | 48089530  | 48097920  | 0.0173265   | chr7:048090 | 0.0173265 |
| C5orf24   | 56         | chr5       | 134204745 | 134210811 | 0.0174446   | chr5:134210 | 0.0174446 |
| CCDC28B   | 57         | chr1       | 32436470  | 32443501  | 0.017452    | chr1:032443 | 0.017452  |
| POLE3     | 58         | chr9       | 115209329 | 115212735 | 0.0174682   | chr9:115212 | 0.0174682 |
| DDEF2     | 60         | chr2       | 9259139   | 9267127   | 0.0175644   | chr2:009265 | 0.0175644 |
| LOC388966 | 62         | chr2       | 85687733  | 85692561  | 0.0177237   | chr2:085692 | 0.0177237 |
| WWTR1     | 63         | chr3       | 150856171 | 150863854 | 0.0178209   | chr3:150857 | 0.0178209 |

|           |           |           |           |           |                          |           |
|-----------|-----------|-----------|-----------|-----------|--------------------------|-----------|
| CENTG2    | 64 chr2   | 236062780 | 236070461 | 0.0178547 | chr2:236062780-236070461 | 0.0178547 |
| ZFYVE28   | 65 chr4   | 2387705   | 2395594   | 0.0178759 | chr4:002387705-2395594   | 0.0178759 |
| KIAA0408  | 66 chr6   | 127835937 | 127844051 | 0.0178769 | chr6:127835937-127844051 | 0.0178769 |
| ZHX1      | 68 chr8   | 124353204 | 124360983 | 0.0179549 | chr8:124353204-124360983 | 0.0179549 |
| TMEM178   | 69 chr2   | 39741052  | 39748791  | 0.0179993 | chr2:039741052-39748791  | 0.0179993 |
| TMEM23    | 71 chr10  | 52051486  | 52058206  | 0.0180147 | chr10:052051486-52058206 | 0.0180147 |
| EIF4G3    | 72 chr1   | 21308383  | 21378799  | 0.0180191 | chr1:021308383-21378799  | 0.0180191 |
| L3MBTL3   | 75 chr6   | 130376098 | 130383822 | 0.0180603 | chr6:130376098-130383822 | 0.0180603 |
| TM2D1     | 76 chr1   | 61960934  | 61967371  | 0.0180954 | chr1:061960934-61967371  | 0.0180954 |
| FLNC      | 77 chr7   | 128252631 | 128286549 | 0.0181194 | chr7:128252631-128286549 | 0.0181194 |
| LHX6      | 78 chr9   | 124028304 | 124036035 | 0.0181358 | chr9:124028304-124036035 | 0.0181358 |
| CYP1B1    | 79 chr2   | 38153796  | 38161210  | 0.0182076 | chr2:038153796-38161210  | 0.0182076 |
| CPNE9     | 80 chr3   | 9719077   | 9746611   | 0.0182812 | chr3:009719077-9746611   | 0.0182812 |
| PRKCE     | 83 chr2   | 45727326  | 45735013  | 0.0183754 | chr2:045727326-45735013  | 0.0183754 |
| GABRB2    | 85 chr5   | 160903987 | 160912706 | 0.0184488 | chr5:160903987-160912706 | 0.0184488 |
| EN2       | 86 chr7   | 154936758 | 154944651 | 0.0184666 | chr7:154936758-154944651 | 0.0184666 |
| DAB2IP    | 91 chr9   | 123496019 | 123547310 | 0.0186485 | chr9:123496019-123547310 | 0.0186485 |
| NIT1      | 92 chr1   | 159354504 | 159357433 | 0.0186549 | chr1:159354504-159357433 | 0.0186549 |
| TFAP2B    | 93 chr6   | 50889428  | 50897008  | 0.0186595 | chr6:050889428-50897008  | 0.0186595 |
| CCDC4     | 94 chr4   | 41847227  | 41852307  | 0.0186604 | chr4:041847227-41852307  | 0.0186604 |
| ACAD11    | 95 chr3   | 133804251 | 133861513 | 0.0186679 | chr3:133804251-133861513 | 0.0186679 |
| C3orf21   | 98 chr3   | 196470804 | 196478605 | 0.0187853 | chr3:196470804-196478605 | 0.0187853 |
| PDE1C     | 99 chr7   | 32074251  | 32082164  | 0.0187954 | chr7:032074251-32082164  | 0.0187954 |
| NMNAT3    | 101 chr3  | 140877079 | 140884966 | 0.018847  | chr3:140877079-140884966 | 0.018847  |
| GPR137B   | 102 chr1  | 234370019 | 234374999 | 0.0188874 | chr1:234370019-234374999 | 0.0188874 |
| CNIH3     | 103 chr1  | 222866130 | 222874015 | 0.0189033 | chr1:222866130-222874015 | 0.0189033 |
| SRF       | 105 chr6  | 43242360  | 43257222  | 0.0190022 | chr6:043242360-43257222  | 0.0190022 |
| OBFC2A    | 106 chr2  | 192246566 | 192254058 | 0.0190107 | chr2:192246566-192254058 | 0.0190107 |
| SPACA1    | 108 chr6  | 88810441  | 88815901  | 0.0190577 | chr6:088810441-88815901  | 0.0190577 |
| CPA1      | 110 chr7  | 129802064 | 129809409 | 0.0191305 | chr7:129802064-129809409 | 0.0191305 |
| FOXL2     | 111 chr3  | 140145962 | 140153981 | 0.0191517 | chr3:140145962-140153981 | 0.0191517 |
| SP8       | 113 chr7  | 20789378  | 20798473  | 0.0192092 | chr7:020789378-20798473  | 0.0192092 |
| FNTA      | 117 chr8  | 43029894  | 43033169  | 0.0193517 | chr8:043029894-43033169  | 0.0193517 |
| CADPS2    | 120 chr7  | 122123743 | 122319199 | 0.0194078 | chr7:122123743-122319199 | 0.0194078 |
| MRPS30    | 121 chr5  | 44839346  | 44847342  | 0.0194082 | chr5:044839346-44847342  | 0.0194082 |
| C20orf132 | 123 chr20 | 35240871  | 35246907  | 0.0194394 | chr20:035240871-35246907 | 0.0194394 |
| ANKRD38   | 128 chr1  | 62555468  | 62561112  | 0.0197125 | chr1:062555468-62561112  | 0.0197125 |
| PRLR      | 131 chr5  | 35123368  | 35270394  | 0.0198121 | chr5:035123368-35270394  | 0.0198121 |
| UNC93A    | 135 chr6  | 167619302 | 167627341 | 0.0199185 | chr6:167619302-167627341 | 0.0199185 |
| RDBP      | 136 chr6  | 32034572  | 32044751  | 0.0199225 | chr6:032034572-32044751  | 0.0199225 |
| PGBD1     | 137 chr6  | 28353965  | 28359820  | 0.0199853 | chr6:028353965-28359820  | 0.0199853 |
| NHLH2     | 138 chr1  | 116182743 | 116189019 | 0.0199973 | chr1:116182743-116189019 | 0.0199973 |
| NID1      | 139 chr1  | 234293948 | 234299963 | 0.0200723 | chr1:234293948-234299963 | 0.0200723 |
| FIGLA     | 141 chr2  | 70869079  | 70876773  | 0.0201408 | chr2:070869079-70876773  | 0.0201408 |
| FBXL6     | 144 chr8  | 145547531 | 145552955 | 0.0201603 | chr8:145547531-145552955 | 0.0201603 |
| RAB43     | 146 chr3  | 130320845 | 130328748 | 0.0202329 | chr3:130320845-130328748 | 0.0202329 |
| HOXD12    | 147 chr2  | 176668922 | 176673696 | 0.0202682 | chr2:176668922-176673696 | 0.0202682 |
| F13A1     | 153 chr6  | 6263653   | 6271418   | 0.0203996 | chr6:006263653-6271418   | 0.0203996 |
| ITPKB     | 154 chr1  | 224989444 | 224996200 | 0.0204047 | chr1:224989444-224996200 | 0.0204047 |
| KCNE4     | 156 chr2  | 223619704 | 223627714 | 0.0204335 | chr2:223619704-223627714 | 0.0204335 |
| ANTXR1    | 157 chr2  | 69088620  | 69095727  | 0.0204405 | chr2:069088620-69095727  | 0.0204405 |
| PPP3CA    | 158 chr4  | 102484710 | 102492717 | 0.0204872 | chr4:102484710-102492717 | 0.0204872 |
| SMARCD3   | 159 chr7  | 150600746 | 150610550 | 0.0204978 | chr7:150600746-150610550 | 0.0204978 |
| SEMA6C    | 161 chr1  | 149383256 | 149385668 | 0.0205758 | chr1:149383256-149385668 | 0.0205758 |
| C3orf27   | 162 chr3  | 129773495 | 129780700 | 0.0205868 | chr3:129773495-129780700 | 0.0205868 |
| GNAT1     | 163 chr3  | 50201594  | 50206661  | 0.0206436 | chr3:050201594-50206661  | 0.0206436 |
| CCDC3     | 164 chr10 | 13081542  | 13085932  | 0.0206554 | chr10:013081542-13085932 | 0.0206554 |
| EPAS1     | 166 chr2  | 46372862  | 46381049  | 0.0207434 | chr2:046372862-46381049  | 0.0207434 |



|           |           |           |           |           |             |           |
|-----------|-----------|-----------|-----------|-----------|-------------|-----------|
| DFNB31    | 167 chr9  | 116304454 | 116312989 | 0.020765  | chr9:116306 | 0.020765  |
| KLHDC7A   | 168 chr1  | 18675491  | 18683133  | 0.0207761 | chr1:01868  | 0.0207761 |
| MYC       | 170 chr8  | 128811461 | 128820364 | 0.0207918 | chr8:12881  | 0.0207918 |
| MRPL55    | 171 chr1  | 226361011 | 226364765 | 0.0208378 | chr1:22636  | 0.0208378 |
| RGS20     | 172 chr8  | 54926922  | 54958216  | 0.0208451 | chr8:05495  | 0.0208451 |
| NUDT18    | 173 chr8  | 22020419  | 22027575  | 0.0208685 | chr8:02202  | 0.0208685 |
| CYP2W1    | 174 chr7  | 989356    | 991942    | 0.0208746 | chr7:00099  | 0.0208746 |
| CCNT2     | 175 chr2  | 135391343 | 135395305 | 0.0209259 | chr2:13539  | 0.0209259 |
| RNF44     | 177 chr5  | 175894644 | 175898921 | 0.0210161 | chr5:17589  | 0.0210161 |
| NR6A1     | 179 chr9  | 126496054 | 126573256 | 0.0210496 | chr9:12657  | 0.0210496 |
| KLHL7     | 180 chr7  | 23106505  | 23114267  | 0.0210727 | chr7:02311  | 0.0210727 |
| KIFC2     | 181 chr8  | 145662610 | 145670251 | 0.021073  | chr8:14566  | 0.021073  |
| RNF122    | 185 chr8  | 33542054  | 33549671  | 0.0211277 | chr8:03354  | 0.0211277 |
| FPGS      | 186 chr9  | 129601534 | 129606976 | 0.0211435 | chr9:12960  | 0.0211435 |
| NCKIPSD   | 187 chr3  | 48695818  | 48700393  | 0.0211486 | chr3:04869  | 0.0211486 |
| LAMC3     | 190 chr9  | 132872083 | 132958264 | 0.0212007 | chr9:13295  | 0.0212007 |
| PCYOX1    | 192 chr2  | 70338880  | 70341307  | 0.0212105 | chr2:07033  | 0.0212105 |
| HIST1H2AM | 194 chr6  | 27968817  | 27968861  | 0.0212893 | chr6:02796  | 0.0212893 |
| C9orf5    | 196 chr9  | 110845979 | 110927428 | 0.0213179 | chr9:11092  | 0.0213179 |
| AFAP      | 198 chr4  | 7824501   | 7992917   | 0.0213464 | chr4:00782  | 0.0213464 |
| FLJ20628  | 201 chr2  | 28944502  | 28952019  | 0.0214135 | chr2:02894  | 0.0214135 |
| NMNAT1    | 202 chr1  | 9926062   | 9930922   | 0.0214294 | chr1:00992  | 0.0214294 |
| PPM1K     | 203 chr4  | 89422310  | 89429794  | 0.021446  | chr4:08942  | 0.021446  |
| MAF1      | 204 chr8  | 145231554 | 145234179 | 0.0214649 | chr8:14523  | 0.0214649 |
| PCDHGA12  | 205 chr5  | 140784943 | 140792948 | 0.0215437 | chr5:14079  | 0.0215437 |
| CCNL1     | 206 chr3  | 158358257 | 158366661 | 0.0215843 | chr3:15836  | 0.0215843 |
| ING3      | 207 chr7  | 120372664 | 120380597 | 0.0215899 | chr7:12037  | 0.0215899 |
| C9orf140  | 208 chr9  | 139082251 | 139084712 | 0.0216341 | chr9:13908  | 0.0216341 |
| DUSP1     | 210 chr5  | 172128297 | 172135285 | 0.0216537 | chr5:17213  | 0.0216537 |
| MGC61598  | 211 chr9  | 139313775 | 139321068 | 0.0216581 | chr9:13931  | 0.0216581 |
| C9orf21   | 212 chr9  | 98455851  | 98460441  | 0.0216703 | chr9:09845  | 0.0216703 |
| FLJ20254  | 214 chr2  | 27103922  | 27111730  | 0.0217008 | chr2:02710  | 0.0217008 |
| SNAP91    | 216 chr6  | 84473271  | 84481210  | 0.0217025 | chr6:08447  | 0.0217025 |
| ELOVL6    | 217 chr4  | 111336704 | 111342563 | 0.0217143 | chr4:11133  | 0.0217143 |
| TSEN2     | 219 chr3  | 12496148  | 12502998  | 0.0217536 | chr3:01250  | 0.0217536 |
| LRDD      | 222 chr11 | 789157    | 795140    | 0.0217733 | chr11:0007  | 0.0217733 |
| EFNA1     | 224 chr1  | 153361564 | 153373952 | 0.0217827 | chr1:15337  | 0.0217827 |
| C9orf64   | 225 chr9  | 85758935  | 85766892  | 0.0218121 | chr9:08576  | 0.0218121 |
| KIAA1984  | 226 chr9  | 138807561 | 138822028 | 0.0218206 | chr9:13882  | 0.0218206 |
| GPRIN1    | 234 chr5  | 175957322 | 175974921 | 0.0219533 | chr5:17595  | 0.0219533 |
| WBSCR18   | 237 chr7  | 72730558  | 72735734  | 0.0219892 | chr7:07273  | 0.0219892 |
| SYT11     | 239 chr1  | 154095984 | 154099139 | 0.02205   | chr1:15409  | 0.02205   |
| VHL       | 242 chr3  | 10154645  | 10160835  | 0.0220781 | chr3:01015  | 0.0220781 |
| FCRLB     | 244 chr1  | 159953750 | 159965055 | 0.0220989 | chr1:15996  | 0.0220989 |
| C6orf141  | 245 chr6  | 49621534  | 49628970  | 0.0221377 | chr6:04962  | 0.0221377 |
| SLC26A4   | 247 chr7  | 107083327 | 107090821 | 0.022182  | chr7:10708  | 0.022182  |
| TMEM129   | 248 chr4  | 1687515   | 1692813   | 0.0221964 | chr4:00168  | 0.0221964 |
| POU4F3    | 249 chr5  | 145693753 | 145701371 | 0.0222087 | chr5:14570  | 0.0222087 |
| TMEM38B   | 250 chr9  | 107491780 | 107498027 | 0.0222097 | chr9:10749  | 0.0222097 |
| DLX6      | 251 chr7  | 96467953  | 96476063  | 0.0222361 | chr7:09647  | 0.0222361 |
| DFNA5     | 252 chr7  | 24761941  | 24768630  | 0.0222576 | chr7:02476  | 0.0222576 |
| MGC29506  | 253 chr5  | 138751325 | 138759126 | 0.0222629 | chr5:13875  | 0.0222629 |
| LRRC2     | 257 chr3  | 46580484  | 46597590  | 0.0223208 | chr3:04658  | 0.0223208 |
| SATB2     | 258 chr2  | 200026705 | 200033417 | 0.0223484 | chr2:20003  | 0.0223484 |
| PRO1853   | 259 chr2  | 37312334  | 37316959  | 0.0223825 | chr2:03731  | 0.0223825 |
| CALM2     | 262 chr2  | 47240782  | 47262569  | 0.0224172 | chr2:04725  | 0.0224172 |
| TRIM4     | 263 chr7  | 99352921  | 99358585  | 0.0224773 | chr7:09935  | 0.0224773 |
| CHST2     | 264 chr3  | 144315602 | 144324851 | 0.0224895 | chr3:14432  | 0.0224895 |



|          |     |       |           |           |           |             |           |
|----------|-----|-------|-----------|-----------|-----------|-------------|-----------|
| C1orf108 | 265 | chr1  | 39224294  | 39231464  | 0.0225134 | chr1:039230 | 0.0225134 |
| KLHL21   | 268 | chr1  | 6583158   | 6586251   | 0.0225433 | chr1:006584 | 0.0225433 |
| SKI      | 270 | chr1  | 2145604   | 2152576   | 0.0225648 | chr1:002150 | 0.0225648 |
| BAT5     | 273 | chr6  | 31762731  | 31779012  | 0.0225769 | chr6:031763 | 0.0225769 |
| CCDC36   | 275 | chr3  | 49211411  | 49274253  | 0.0226413 | chr3:049211 | 0.0226413 |
| DERL1    | 278 | chr8  | 124121099 | 124128962 | 0.0226643 | chr8:124121 | 0.0226643 |
| KLF15    | 279 | chr3  | 127556918 | 127564285 | 0.0226712 | chr3:127556 | 0.0226712 |
| ROCK2    | 284 | chr2  | 11400010  | 11407540  | 0.0227954 | chr2:011401 | 0.0227954 |
| KCTD8    | 286 | chr4  | 44143017  | 44151017  | 0.022827  | chr4:044144 | 0.022827  |
| C6orf145 | 287 | chr6  | 3694369   | 3701955   | 0.0228423 | chr6:003694 | 0.0228423 |
| CD8A     | 288 | chr2  | 86869131  | 86876650  | 0.0228537 | chr2:086869 | 0.0228537 |
| ASTN2    | 289 | chr9  | 118487790 | 119222452 | 0.0228633 | chr9:118488 | 0.0228633 |
| CLCNKA   | 293 | chr1  | 16221221  | 16224187  | 0.0229211 | chr1:016221 | 0.0229211 |
| DDX56    | 294 | chr7  | 44577544  | 44585139  | 0.0229232 | chr7:044580 | 0.0229232 |
| RXRA     | 298 | chr9  | 136427846 | 136472197 | 0.0229654 | chr9:136466 | 0.0229654 |
| GTPBP8   | 299 | chr3  | 114187128 | 114194904 | 0.0229947 | chr3:114192 | 0.0229947 |
| DES      | 303 | chr2  | 219988427 | 219993901 | 0.0230737 | chr2:219992 | 0.0230737 |
| FAM129B  | 304 | chr9  | 129368569 | 129376689 | 0.0230782 | chr9:129370 | 0.0230782 |
| CSPP1    | 305 | chr8  | 68139215  | 68161073  | 0.0231196 | chr8:068139 | 0.0231196 |
| REEP1    | 311 | chr2  | 86415979  | 86421116  | 0.0232211 | chr2:086417 | 0.0232211 |
| MICALL2  | 314 | chr7  | 1462999   | 1471112   | 0.0232322 | chr7:001463 | 0.0232322 |
| PPP2CA   | 316 | chr5  | 133587189 | 133594486 | 0.0232546 | chr5:133589 | 0.0232546 |
| ZNF33B   | 318 | chr10 | 42451788  | 42457700  | 0.0232919 | chr10:04245 | 0.0232919 |
| CEBPB    | 319 | chr20 | 48236320  | 48243320  | 0.0232983 | chr20:04824 | 0.0232983 |
| ITGA8    | 320 | chr10 | 15799267  | 15807149  | 0.0233032 | chr10:01580 | 0.0233032 |
| HAAO     | 324 | chr2  | 42847750  | 42878226  | 0.0233359 | chr2:042849 | 0.0233359 |
| WDR35    | 330 | chr2  | 20051232  | 20055273  | 0.0234024 | chr2:020055 | 0.0234024 |
| CPLX2    | 332 | chr5  | 175152900 | 175240757 | 0.023423  | chr5:175237 | 0.023423  |
| FZD5     | 333 | chr2  | 208339853 | 208347542 | 0.0234288 | chr2:208347 | 0.0234288 |
| SEMA6A   | 334 | chr5  | 115935577 | 115941809 | 0.0234366 | chr5:115938 | 0.0234366 |
| ALS2     | 335 | chr2  | 202351535 | 202359011 | 0.0234407 | chr2:202355 | 0.0234407 |
| ADCY3    | 337 | chr2  | 24993115  | 25001015  | 0.0234639 | chr2:024999 | 0.0234639 |
| EDD1     | 340 | chr8  | 103491323 | 103499001 | 0.0235123 | chr8:103499 | 0.0235123 |
| MGC99813 | 342 | chr2  | 220117219 | 220122227 | 0.0235321 | chr2:220117 | 0.0235321 |
| SFRP2    | 346 | chr4  | 154927132 | 154935208 | 0.0235925 | chr4:154929 | 0.0235925 |
| PCSK1    | 349 | chr5  | 95792144  | 95799069  | 0.02362   | chr5:095794 | 0.02362   |
| GADD45G  | 350 | chr9  | 91404696  | 91412293  | 0.0236255 | chr9:091409 | 0.0236255 |
| IKZF1    | 351 | chr7  | 50313463  | 50414174  | 0.0236489 | chr7:050314 | 0.0236489 |
| CENTA1   | 352 | chr7  | 958341    | 965391    | 0.0236514 | chr7:000958 | 0.0236514 |
| CXCL12   | 357 | chr10 | 44198156  | 44205133  | 0.0236789 | chr10:04419 | 0.0236789 |
| RGL2     | 359 | chr6  | 33367074  | 33375318  | 0.0237088 | chr6:033377 | 0.0237088 |
| SIAHBP1  | 368 | chr8  | 144970607 | 144987583 | 0.0238339 | chr8:144970 | 0.0238339 |
| RBM15B   | 369 | chr3  | 51401904  | 51407697  | 0.0238415 | chr3:051404 | 0.0238415 |
| PROM2    | 371 | chr2  | 95298454  | 95306489  | 0.0238575 | chr2:095304 | 0.0238575 |
| KLHDC8A  | 376 | chr1  | 203577060 | 203585296 | 0.0238926 | chr1:203579 | 0.0238926 |
| QSCN6L1  | 377 | chr9  | 138237985 | 138263688 | 0.0238941 | chr9:138247 | 0.0238941 |
| TXNDC6   | 379 | chr3  | 139523933 | 139536201 | 0.0238992 | chr3:139537 | 0.0238992 |
| HSPA4L   | 383 | chr4  | 128917977 | 128925585 | 0.0239159 | chr4:128925 | 0.0239159 |
| IGSF4B   | 384 | chr1  | 157402830 | 157438403 | 0.0239162 | chr1:157409 | 0.0239162 |
| RABGAP1  | 385 | chr9  | 124743174 | 124916451 | 0.0239166 | chr9:124743 | 0.0239166 |
| SASS6    | 386 | chr1  | 100366110 | 100371058 | 0.023926  | chr1:100377 | 0.023926  |
| ZFP41    | 389 | chr8  | 144397086 | 144416272 | 0.0239392 | chr8:144407 | 0.0239392 |
| PRR7     | 391 | chr5  | 176802578 | 176816033 | 0.023941  | chr5:176814 | 0.023941  |
| COL9A2   | 392 | chr1  | 40553121  | 40560170  | 0.0239411 | chr1:040555 | 0.0239411 |
| KIAA1706 | 396 | chr7  | 36153842  | 36161858  | 0.0240531 | chr7:036160 | 0.0240531 |
| NRXN1    | 397 | chr2  | 50425209  | 50433854  | 0.024063  | chr2:050426 | 0.024063  |
| KRTCAP3  | 401 | chr2  | 27518973  | 27521017  | 0.024123  | chr2:027519 | 0.024123  |
| WRNIP1   | 402 | chr6  | 2706237   | 2713292   | 0.0241328 | chr6:002710 | 0.0241328 |

|           |           |           |           |           |             |           |
|-----------|-----------|-----------|-----------|-----------|-------------|-----------|
| MGC42105  | 405 chr5  | 43226448  | 43230537  | 0.0241686 | chr5:043229 | 0.0241686 |
| HCFC1     | 406 chrX  | 152866280 | 152889747 | 0.0242292 | chrX:152888 | 0.0242292 |
| PURA      | 407 chr5  | 139468549 | 139476446 | 0.0242471 | chr5:139474 | 0.0242471 |
| COBRA1    | 408 chr9  | 139267849 | 139287823 | 0.0242565 | chr9:13927  | 0.0242565 |
| C14orf149 | 409 chr14 | 59015708  | 59020835  | 0.0242781 | chr14:05902 | 0.0242781 |
| DCC1      | 410 chr8  | 120915476 | 120942790 | 0.0243179 | chr8:120937 | 0.0243179 |
| PRUNE     | 412 chr1  | 149247657 | 149274560 | 0.0243325 | chr1:149247 | 0.0243325 |
| ATP5C1    | 414 chr10 | 7870229   | 7874250   | 0.0243924 | chr10:00787 | 0.0243924 |
| C1orf164  | 418 chr1  | 44638331  | 44652817  | 0.0244548 | chr1:044644 | 0.0244548 |
| MAP1B     | 419 chr5  | 71434589  | 71441498  | 0.0244592 | chr5:071439 | 0.0244592 |
| BRD2      | 420 chr6  | 33041356  | 33050892  | 0.0244652 | chr6:033048 | 0.0244652 |
| ATG9A     | 423 chr2  | 219792332 | 219802443 | 0.0244732 | chr2:21980  | 0.0244732 |
| AHCYL1    | 424 chr1  | 110323366 | 110331682 | 0.024475  | chr1:110329 | 0.024475  |
| EIF3S4    | 425 chr19 | 10089061  | 10094469  | 0.0244805 | chr19:01009 | 0.0244805 |
| C10orf108 | 428 chr10 | 680585    | 688515    | 0.024491  | chr10:00068 | 0.024491  |
| TTC32     | 430 chr2  | 19962796  | 19970669  | 0.0244937 | chr2:01996  | 0.0244937 |
| SH3RF1    | 435 chr4  | 170426286 | 170434122 | 0.024559  | chr4:170428 | 0.024559  |
| IER5      | 437 chr1  | 179318804 | 179327086 | 0.0245757 | chr1:179324 | 0.0245757 |
| S100A5    | 440 chr1  | 151776396 | 151782743 | 0.0246109 | chr1:151780 | 0.0246109 |
| NBL1      | 441 chr1  | 19836868  | 19845880  | 0.0246159 | chr1:019844 | 0.0246159 |
| PREI3     | 444 chr2  | 198083816 | 198090760 | 0.0246742 | chr2:198089 | 0.0246742 |
| NEFL      | 445 chr8  | 24867089  | 24875491  | 0.0246974 | chr8:024869 | 0.0246974 |
| TXNL1     | 446 chr18 | 52454546  | 52458664  | 0.0246985 | chr18:05245 | 0.0246985 |
| PPP1R12B  | 447 chr1  | 200584533 | 200709957 | 0.0247023 | chr1:200584 | 0.0247023 |
| NTRK1     | 451 chr1  | 155050802 | 155100809 | 0.0247272 | chr1:155099 | 0.0247272 |
| TMEM33    | 453 chr4  | 41626549  | 41634684  | 0.02478   | chr4:041632 | 0.02478   |
| LOC130576 | 454 chr2  | 149597744 | 149606003 | 0.0247818 | chr2:149603 | 0.0247818 |
| STOX2     | 455 chr4  | 185058796 | 185066003 | 0.024805  | chr4:185063 | 0.024805  |
| C1orf187  | 456 chr1  | 11673813  | 11690771  | 0.0248166 | chr1:011675 | 0.0248166 |
| HLXB9     | 464 chr7  | 156493554 | 156501425 | 0.024923  | chr7:156499 | 0.024923  |
| PLXND1    | 465 chr3  | 130806424 | 130813730 | 0.0249259 | chr3:130807 | 0.0249259 |
| HAT1      | 466 chr2  | 172483092 | 172489677 | 0.0249295 | chr2:172487 | 0.0249295 |
| GLRX2     | 468 chr1  | 191339535 | 191346060 | 0.024937  | chr1:191340 | 0.024937  |
| WTAP      | 470 chr6  | 160063454 | 160071090 | 0.024958  | chr6:160068 | 0.024958  |
| ABCG5     | 471 chr2  | 43914795  | 43919313  | 0.0249696 | chr2:043919 | 0.0249696 |
| RNF144    | 474 chr2  | 6969581   | 6977530   | 0.0250104 | chr2:006976 | 0.0250104 |
| LARP1     | 475 chr5  | 154070717 | 154117388 | 0.0250345 | chr5:154116 | 0.0250345 |
| IRX2      | 476 chr5  | 2799976   | 2804479   | 0.0250458 | chr5:002803 | 0.0250458 |
| MSL2L1    | 480 chr3  | 137394257 | 137399953 | 0.0250894 | chr3:137396 | 0.0250894 |
| ZBTB2     | 484 chr6  | 151752230 | 151759706 | 0.0251141 | chr6:151752 | 0.0251141 |
| RAP2B     | 485 chr3  | 154357322 | 154365697 | 0.0251423 | chr3:154363 | 0.0251423 |
| CUL1      | 486 chr7  | 148021374 | 148029332 | 0.0251578 | chr7:148027 | 0.0251578 |
| PPP2R5E   | 488 chr14 | 63077427  | 63084809  | 0.0251822 | chr14:06307 | 0.0251822 |
| SMOC2     | 490 chr6  | 168581419 | 168587250 | 0.025246  | chr6:168589 | 0.025246  |
| CMYA5     | 492 chr5  | 79017916  | 79023242  | 0.0252511 | chr5:079022 | 0.0252511 |
| C4orf16   | 494 chr4  | 113367001 | 113375193 | 0.0252904 | chr4:113372 | 0.0252904 |
| RER1      | 499 chr1  | 2313219   | 2318528   | 0.0253105 | chr1:002313 | 0.0253105 |
| EVC2      | 500 chr4  | 5758829   | 5761180   | 0.0253422 | chr4:00576  | 0.0253422 |
| NR2F1     | 506 chr5  | 92939498  | 92948907  | 0.0254076 | chr5:092946 | 0.0254076 |
| CELSR3    | 507 chr3  | 48648998  | 48678219  | 0.0254146 | chr3:048652 | 0.0254146 |
| DNAI1     | 508 chr9  | 34448804  | 34510979  | 0.02543   | chr9:034448 | 0.02543   |
| TUBA1     | 509 chr2  | 219822654 | 219831871 | 0.0254412 | chr2:219826 | 0.0254412 |
| P2RY1     | 512 chr3  | 154030063 | 154038633 | 0.0254573 | chr3:154036 | 0.0254573 |
| CDS1      | 514 chr4  | 85718170  | 85726029  | 0.0254722 | chr4:085722 | 0.0254722 |
| FOXF1     | 515 chr16 | 85096215  | 85104105  | 0.0254749 | chr16:08510 | 0.0254749 |
| PTGDS     | 517 chr9  | 138983896 | 138996018 | 0.0254974 | chr9:138994 | 0.0254974 |
| WFS1      | 518 chr4  | 6317006   | 6325018   | 0.0254996 | chr4:006323 | 0.0254996 |
| BTF3      | 519 chr5  | 72824962  | 72832844  | 0.0255311 | chr5:072830 | 0.0255311 |

|           |           |           |           |           |            |           |
|-----------|-----------|-----------|-----------|-----------|------------|-----------|
| GNPDA2    | 524 chr4  | 44416638  | 44428418  | 0.0256197 | chr4:04442 | 0.0256197 |
| ATP5G3    | 526 chr2  | 175751998 | 175759569 | 0.0256529 | chr2:17575 | 0.0256529 |
| TLE1      | 527 chr9  | 83490447  | 83498787  | 0.0256733 | chr9:08349 | 0.0256733 |
| GDAP1     | 531 chr8  | 75419819  | 75427729  | 0.0257577 | chr8:07542 | 0.0257577 |
| MATN3     | 533 chr2  | 20055336  | 20081145  | 0.0257655 | chr2:02007 | 0.0257655 |
| COL5A1    | 535 chr9  | 136667959 | 136676278 | 0.0257919 | chr9:13667 | 0.0257919 |
| EIF4EBP1  | 537 chr8  | 38002688  | 38009620  | 0.0258093 | chr8:03800 | 0.0258093 |
| PTGER3    | 538 chr1  | 71283370  | 71291374  | 0.0258124 | chr1:07128 | 0.0258124 |
| L1TD1     | 539 chr1  | 62428287  | 62434822  | 0.0258404 | chr1:06243 | 0.0258404 |
| ZNF533    | 540 chr2  | 180432074 | 180439579 | 0.0258578 | chr2:18043 | 0.0258578 |
| MDGA1     | 543 chr6  | 37771389  | 37779089  | 0.0258922 | chr6:03777 | 0.0258922 |
| SNTG1     | 544 chr8  | 51464087  | 51471844  | 0.0259118 | chr8:05146 | 0.0259118 |
| XKR4      | 545 chr8  | 56174239  | 56180550  | 0.0259123 | chr8:05617 | 0.0259123 |
| LGR6      | 549 chr1  | 200424483 | 200452427 | 0.0259518 | chr1:20045 | 0.0259518 |
| FAM46A    | 550 chr6  | 82516592  | 82524613  | 0.0259721 | chr6:08251 | 0.0259721 |
| STAMBP    | 552 chr2  | 73904332  | 73914009  | 0.0259938 | chr2:07390 | 0.0259938 |
| SLC10A4   | 553 chr4  | 48175144  | 48185843  | 0.0260024 | chr4:04818 | 0.0260024 |
| MAGI3     | 554 chr1  | 113729592 | 113737670 | 0.0260067 | chr1:11373 | 0.0260067 |
| COPS6     | 555 chr7  | 99524578  | 99527966  | 0.0260069 | chr7:09952 | 0.0260069 |
| JMJD1B    | 557 chr5  | 137713400 | 137800575 | 0.0260277 | chr5:13771 | 0.0260277 |
| EGR3      | 559 chr8  | 22604000  | 22611757  | 0.0260311 | chr8:02260 | 0.0260311 |
| SLC28A3   | 563 chr9  | 86142888  | 86150809  | 0.0260731 | chr9:08614 | 0.0260731 |
| ARSB      | 564 chr5  | 78314358  | 78323589  | 0.0260755 | chr5:07831 | 0.0260755 |
| MAB21L2   | 571 chr4  | 151717260 | 151726148 | 0.0261414 | chr4:15172 | 0.0261414 |
| SYNPO     | 572 chr5  | 149995110 | 150016918 | 0.0261508 | chr5:15000 | 0.0261508 |
| RAB11FIP5 | 573 chr2  | 73154034  | 73197756  | 0.0261523 | chr2:07319 | 0.0261523 |
| C2orf18   | 574 chr2  | 26835315  | 26857456  | 0.0261561 | chr2:02684 | 0.0261561 |
| UCK1      | 575 chr9  | 133394009 | 133400971 | 0.0261762 | chr9:13339 | 0.0261762 |
| IQCB1     | 576 chr3  | 123034498 | 123036538 | 0.0261814 | chr3:12303 | 0.0261814 |
| UNC5C     | 577 chr4  | 96686574  | 96694864  | 0.0261983 | chr4:09668 | 0.0261983 |
| RWDD3     | 578 chr1  | 95467234  | 95474778  | 0.0262003 | chr1:09547 | 0.0262003 |
| PABPN1    | 579 chr14 | 22854241  | 22862609  | 0.0262023 | chr14:0228 | 0.0262023 |
| HOXA10    | 580 chr7  | 27176821  | 27187227  | 0.0262049 | chr7:02718 | 0.0262049 |
| EFNA5     | 581 chr5  | 107031788 | 107039672 | 0.0262191 | chr5:10703 | 0.0262191 |
| DMRT3     | 583 chr9  | 961509    | 969455    | 0.0262577 | chr9:00096 | 0.0262577 |
| FOS       | 587 chr14 | 74809900  | 74817771  | 0.0262884 | chr14:0748 | 0.0262884 |
| VILL      | 591 chr3  | 38006967  | 38016030  | 0.0263086 | chr3:03801 | 0.0263086 |
| POLR2L    | 593 chr11 | 829337    | 832511    | 0.0263363 | chr11:0008 | 0.0263363 |
| IGFBPL1   | 595 chr9  | 38411918  | 38419824  | 0.0263558 | chr9:03841 | 0.0263558 |
| PASK      | 596 chr2  | 241694236 | 241737569 | 0.02636   | chr2:24173 | 0.02636   |
| HOXD10    | 597 chr2  | 176682759 | 176692918 | 0.0263657 | chr2:17669 | 0.0263657 |
| CRHR2     | 599 chr7  | 30685951  | 30693876  | 0.0263729 | chr7:03068 | 0.0263729 |
| TOR1AIP1  | 601 chr1  | 178118061 | 178123582 | 0.0263797 | chr1:17811 | 0.0263797 |
| LOX       | 604 chr5  | 121439152 | 121447318 | 0.026396  | chr5:12144 | 0.026396  |
| SMAD5     | 608 chr5  | 135491667 | 135498861 | 0.0264328 | chr5:13549 | 0.0264328 |
| TSC22D2   | 609 chr3  | 151603525 | 151612273 | 0.0264424 | chr3:15160 | 0.0264424 |
| HHIP      | 611 chr4  | 145782111 | 145789722 | 0.0264493 | chr4:14578 | 0.0264493 |
| BZW2      | 615 chr7  | 16652297  | 16657327  | 0.0264895 | chr7:01665 | 0.0264895 |
| C1QC      | 616 chr1  | 22840125  | 22847209  | 0.026497  | chr1:02284 | 0.026497  |
| C22orf34  | 617 chr22 | 48401814  | 48410085  | 0.0265046 | chr22:0484 | 0.0265046 |
| SLC26A1   | 618 chr4  | 970801    | 982490    | 0.0265135 | chr4:00097 | 0.0265135 |
| RRAGA     | 620 chr9  | 19034335  | 19041071  | 0.0265264 | chr9:01904 | 0.0265264 |
| CTNNAL1   | 621 chr9  | 110813321 | 110820744 | 0.0265336 | chr9:11081 | 0.0265336 |
| TTYH3     | 623 chr7  | 2632736   | 2640605   | 0.0265415 | chr7:00264 | 0.0265415 |
| CLDN23    | 624 chr8  | 8592699   | 8599829   | 0.0265651 | chr8:00859 | 0.0265651 |
| TRIM7     | 626 chr5  | 180557288 | 180569570 | 0.0265887 | chr5:18055 | 0.0265887 |
| MTF2      | 630 chr1  | 93314597  | 93320188  | 0.0266428 | chr1:09331 | 0.0266428 |
| NT5DC2    | 631 chr3  | 52540114  | 52549618  | 0.0266606 | chr3:05254 | 0.0266606 |

|           |           |           |           |           |             |           |
|-----------|-----------|-----------|-----------|-----------|-------------|-----------|
| PDLIM7    | 632 chr5  | 176854750 | 176860853 | 0.0266629 | chr5:176854 | 0.0266629 |
| GOT2      | 634 chr16 | 57323198  | 57330945  | 0.0266936 | chr16:05732 | 0.0266936 |
| ADAR      | 636 chr1  | 152844950 | 152871257 | 0.026701  | chr1:152866 | 0.026701  |
| C5orf30   | 638 chr5  | 102616955 | 102624804 | 0.0267149 | chr5:102622 | 0.0267149 |
| ARHGAP12  | 643 chr10 | 32235695  | 32263256  | 0.0267349 | chr10:03222 | 0.0267349 |
| C3orf19   | 645 chr3  | 14662929  | 14689076  | 0.026759  | chr3:014668 | 0.026759  |
| PYCARD    | 647 chr16 | 31119653  | 31122161  | 0.0267875 | chr16:03112 | 0.0267875 |
| ACTA1     | 648 chr1  | 227633344 | 227640707 | 0.0267895 | chr1:227638 | 0.0267895 |
| NPM2      | 650 chr8  | 21936970  | 21940727  | 0.0267947 | chr8:021938 | 0.0267947 |
| CCDC108   | 652 chr2  | 219575901 | 219619555 | 0.0268427 | chr2:219602 | 0.0268427 |
| PTPRU     | 654 chr1  | 29435758  | 29438117  | 0.0268511 | chr1:029436 | 0.0268511 |
| LHFPL2    | 655 chr5  | 77839447  | 77847177  | 0.0268556 | chr5:07784  | 0.0268556 |
| KBTBD5    | 656 chr3  | 42697383  | 42704505  | 0.026866  | chr3:042703 | 0.026866  |
| FAM57B    | 659 chr16 | 29939927  | 29955165  | 0.0268918 | chr16:02992 | 0.0268918 |
| FAM20C    | 662 chr7  | 282736    | 290749    | 0.0269044 | chr7:000288 | 0.0269044 |
| MASP2     | 664 chr1  | 11027343  | 11035345  | 0.0269446 | chr1:011027 | 0.0269446 |
| PIP5K1B   | 665 chr9  | 70505078  | 70629466  | 0.0269772 | chr9:070510 | 0.0269772 |
| SERP1     | 666 chr3  | 151741743 | 151747118 | 0.0269818 | chr3:151741 | 0.0269818 |
| ADAMTS3   | 667 chr4  | 73651166  | 73658901  | 0.0269973 | chr4:073652 | 0.0269973 |
| OSMR      | 668 chr5  | 38876470  | 38884381  | 0.0270052 | chr5:038882 | 0.0270052 |
| QARS      | 669 chr3  | 49108343  | 49120992  | 0.027015  | chr3:049116 | 0.027015  |
| ERLIN2    | 670 chr8  | 37708152  | 37734403  | 0.0270152 | chr8:037714 | 0.0270152 |
| PKN2      | 671 chr1  | 88918283  | 88925344  | 0.0270371 | chr1:088922 | 0.0270371 |
| C1orf50   | 673 chr1  | 43005557  | 43010617  | 0.0270488 | chr1:043005 | 0.0270488 |
| RASGEF1C  | 676 chr5  | 179493807 | 179574184 | 0.0270549 | chr5:179498 | 0.0270549 |
| PPP1R14C  | 678 chr6  | 150501199 | 150508462 | 0.0270759 | chr6:150506 | 0.0270759 |
| LOC401498 | 679 chr9  | 32768244  | 32776475  | 0.0270833 | chr9:032774 | 0.0270833 |
| FGF22     | 681 chr19 | 591001    | 593115    | 0.0270914 | chr19:00059 | 0.0270914 |
| ST8SIA4   | 682 chr5  | 100264081 | 100270099 | 0.0271014 | chr5:100264 | 0.0271014 |
| NUDT1     | 683 chr7  | 2248414   | 2253800   | 0.0271053 | chr7:002250 | 0.0271053 |
| C9orf23   | 684 chr9  | 34599950  | 34603408  | 0.0271055 | chr9:034602 | 0.0271055 |
| ADCY8     | 685 chr8  | 132121609 | 132129364 | 0.027125  | chr8:132122 | 0.027125  |
| PTCRA     | 687 chr6  | 42986803  | 43001459  | 0.0271336 | chr6:043000 | 0.0271336 |
| PPP1R15B  | 690 chr1  | 202644799 | 202652977 | 0.0271719 | chr1:202647 | 0.0271719 |
| MARS2     | 692 chr2  | 198276760 | 198281758 | 0.0271893 | chr2:198279 | 0.0271893 |
| C1orf172  | 694 chr1  | 27149086  | 27163345  | 0.0271983 | chr1:027150 | 0.0271983 |
| CALML6    | 698 chr1  | 1830632   | 1838708   | 0.0272117 | chr1:001836 | 0.0272117 |
| SNRPG     | 700 chr2  | 70372255  | 70376551  | 0.0272211 | chr2:070374 | 0.0272211 |
| PRCC      | 705 chr1  | 155001000 | 155006672 | 0.0273266 | chr1:155002 | 0.0273266 |
| CTPS      | 707 chr1  | 41212722  | 41220451  | 0.0273417 | chr1:041218 | 0.0273417 |
| GNLY      | 710 chr2  | 85772871  | 85776962  | 0.027361  | chr2:085777 | 0.027361  |
| DOM3Z     | 712 chr6  | 32047644  | 32056309  | 0.0273796 | chr6:032047 | 0.0273796 |
| TBR1      | 714 chr2  | 161976211 | 161983923 | 0.0273861 | chr2:16198  | 0.0273861 |
| KIAA0828  | 721 chr7  | 128647033 | 128857293 | 0.0274637 | chr7:128652 | 0.0274637 |
| C6orf120  | 722 chr6  | 169844184 | 169848286 | 0.027466  | chr6:169844 | 0.027466  |
| FAM82B    | 724 chr8  | 87587787  | 87590070  | 0.0274863 | chr8:087588 | 0.0274863 |
| DNAJC1    | 727 chr10 | 22330266  | 22337854  | 0.0274958 | chr10:02233 | 0.0274958 |
| CAMK2D    | 728 chr4  | 114899264 | 114907634 | 0.0274983 | chr4:114901 | 0.0274983 |
| SOX4      | 729 chr6  | 21696585  | 21705099  | 0.0274987 | chr6:021703 | 0.0274987 |
| ZNF167    | 730 chr3  | 44567978  | 44599965  | 0.0275012 | chr3:04457  | 0.0275012 |
| GMCL1     | 733 chr2  | 69907541  | 69911515  | 0.0275071 | chr2:069910 | 0.0275071 |
| TUBE1     | 734 chr6  | 112513081 | 112515267 | 0.0275322 | chr6:112515 | 0.0275322 |
| MTSS1     | 736 chr8  | 125806891 | 125815271 | 0.0275822 | chr8:125808 | 0.0275822 |
| GUCY1A3   | 746 chr4  | 156801982 | 156810583 | 0.0276616 | chr4:156808 | 0.0276616 |
| OTX1      | 747 chr2  | 63127146  | 63133878  | 0.0276635 | chr2:063133 | 0.0276635 |
| DMRT2     | 748 chr9  | 1036242   | 1044080   | 0.0276877 | chr9:00104  | 0.0276877 |
| IER5L     | 750 chr9  | 130977841 | 130985665 | 0.0277181 | chr9:130980 | 0.0277181 |
| NISCH     | 751 chr3  | 52464745  | 52502142  | 0.0277425 | chr3:052468 | 0.0277425 |

|           |           |           |           |           |             |           |
|-----------|-----------|-----------|-----------|-----------|-------------|-----------|
| MCFD2     | 752 chr2  | 46994149  | 47001400  | 0.0277494 | chr2:046996 | 0.0277494 |
| MARCH8    | 753 chr10 | 45348436  | 45414656  | 0.0277554 | chr10:0454  | 0.0277554 |
| ABLIM3    | 756 chr5  | 148495981 | 148504306 | 0.0277786 | chr5:148502 | 0.0277786 |
| ADRA2B    | 757 chr2  | 96143232  | 96149472  | 0.0277929 | chr2:096145 | 0.0277929 |
| C10orf111 | 758 chr10 | 15177737  | 15179200  | 0.0277968 | chr10:01517 | 0.0277968 |
| GRM6      | 759 chr5  | 178352048 | 178360226 | 0.0278031 | chr5:178352 | 0.0278031 |
| ANKRA2    | 761 chr5  | 72892749  | 72897124  | 0.0278293 | chr5:072896 | 0.0278293 |
| LOC391356 | 763 chr2  | 24864748  | 24869678  | 0.0278644 | chr2:024865 | 0.0278644 |
| MYCN      | 764 chr2  | 15993824  | 16002062  | 0.0278815 | chr2:015998 | 0.0278815 |
| PPP2R3A   | 765 chr3  | 137165644 | 137227113 | 0.0278825 | chr3:137167 | 0.0278825 |
| ITPKA     | 768 chr15 | 39569081  | 39575824  | 0.0279262 | chr15:03957 | 0.0279262 |
| UBIAD1    | 769 chr1  | 11255452  | 11256902  | 0.0279308 | chr1:011255 | 0.0279308 |
| RXR8      | 770 chr6  | 33269340  | 33276385  | 0.0279389 | chr6:033269 | 0.0279389 |
| FLJ46836  | 771 chr9  | 131944072 | 131946938 | 0.0279427 | chr9:131945 | 0.0279427 |
| CRIP3     | 782 chr6  | 43382292  | 43389966  | 0.0280167 | chr6:043382 | 0.0280167 |
| CD8B      | 784 chr2  | 86901400  | 86908676  | 0.0280219 | chr2:086901 | 0.0280219 |
| FZD7      | 787 chr2  | 202602331 | 202610054 | 0.0280476 | chr2:202602 | 0.0280476 |
| C2orf32   | 792 chr2  | 68397580  | 68405107  | 0.028118  | chr2:068399 | 0.028118  |
| PPM1M     | 793 chr3  | 52255241  | 52258568  | 0.0281289 | chr3:052255 | 0.0281289 |
| CAPN10    | 794 chr2  | 241170109 | 241177441 | 0.0281355 | chr2:241175 | 0.0281355 |
| FGF20     | 804 chr8  | 16901817  | 16907367  | 0.0281695 | chr8:016903 | 0.0281695 |
| CHAT      | 806 chr10 | 50482911  | 50496922  | 0.0281838 | chr10:05048 | 0.0281838 |
| VARS      | 810 chr6  | 31853332  | 31873175  | 0.0282181 | chr6:031855 | 0.0282181 |
| ZNF346    | 811 chr5  | 176376858 | 176384564 | 0.0282271 | chr5:176383 | 0.0282271 |
| HLA-DOA   | 815 chr6  | 33082969  | 33090793  | 0.0282789 | chr6:033083 | 0.0282789 |
| SCLY      | 819 chr2  | 238630374 | 238672716 | 0.0283304 | chr2:238670 | 0.0283304 |
| C9orf50   | 820 chr9  | 131421673 | 131422698 | 0.0283317 | chr9:131422 | 0.0283317 |
| INTS5     | 821 chr11 | 62170882  | 62177445  | 0.0283361 | chr11:06217 | 0.0283361 |
| LTBP1     | 823 chr2  | 33020797  | 33028402  | 0.0283411 | chr2:033020 | 0.0283411 |
| FAM3B     | 825 chr21 | 41606553  | 41651474  | 0.0283471 | chr21:0416  | 0.0283471 |
| LRRC24    | 831 chr8  | 145718666 | 145725140 | 0.0283906 | chr8:145720 | 0.0283906 |
| TRHDE     | 833 chr12 | 70952932  | 70957869  | 0.0284046 | chr12:07095 | 0.0284046 |
| MLF1IP    | 835 chr4  | 185889845 | 185892600 | 0.0284125 | chr4:18589  | 0.0284125 |
| DPP7      | 840 chr9  | 139126578 | 139131955 | 0.028458  | chr9:139126 | 0.028458  |
| CITED1    | 843 chrX  | 71441453  | 71449016  | 0.0284736 | chrX:071444 | 0.0284736 |
| RBM13     | 846 chr8  | 33461523  | 33464400  | 0.0284925 | chr8:033462 | 0.0284925 |
| PCDH10    | 847 chr4  | 134284601 | 134292323 | 0.0285156 | chr4:13429  | 0.0285156 |
| CRSP9     | 848 chr5  | 156499993 | 156507034 | 0.0285206 | chr5:15650  | 0.0285206 |
| MYLIP     | 851 chr6  | 16231826  | 16239952  | 0.0285552 | chr6:016231 | 0.0285552 |
| GORASP1   | 852 chr3  | 39119122  | 39124053  | 0.0285595 | chr3:039120 | 0.0285595 |
| TRIM72    | 855 chr16 | 31132568  | 31134549  | 0.0286226 | chr16:03113 | 0.0286226 |
| NOL12     | 856 chr22 | 36406940  | 36414664  | 0.0286243 | chr22:0364  | 0.0286243 |
| MGST2     | 857 chr4  | 140801149 | 140808180 | 0.0286278 | chr4:140806 | 0.0286278 |
| TRIM26    | 859 chr6  | 30286956  | 30293500  | 0.0286358 | chr6:030286 | 0.0286358 |
| ARHGAP24  | 862 chr4  | 86610071  | 87073565  | 0.0286614 | chr4:086615 | 0.0286614 |
| CHRM2     | 863 chr7  | 136198422 | 136352661 | 0.0286665 | chr7:136206 | 0.0286665 |
| MRS2L     | 864 chr6  | 24508106  | 24513653  | 0.0286684 | chr6:024511 | 0.0286684 |
| ZNHIT4    | 867 chr2  | 74532670  | 74538595  | 0.0286967 | chr2:074538 | 0.0286967 |
| SRPK2     | 870 chr7  | 104694001 | 104821280 | 0.0287267 | chr7:104815 | 0.0287267 |
| ZFP36L2   | 872 chr2  | 43302507  | 43312707  | 0.0287356 | chr2:043305 | 0.0287356 |
| C9orf164  | 873 chr9  | 91166274  | 91174453  | 0.0287409 | chr9:091166 | 0.0287409 |
| TRIB2     | 875 chr2  | 12769335  | 12778297  | 0.0287539 | chr2:012775 | 0.0287539 |
| NEUROG1   | 876 chr5  | 134897054 | 134905062 | 0.0287974 | chr5:134899 | 0.0287974 |
| USP19     | 878 chr3  | 49121100  | 49133360  | 0.0288148 | chr3:049133 | 0.0288148 |
| SLC6A3    | 882 chr5  | 1496190   | 1503790   | 0.0288416 | chr5:001497 | 0.0288416 |
| KCNJ10    | 889 chr1  | 158304287 | 158307922 | 0.0289018 | chr1:158305 | 0.0289018 |
| ADC       | 891 chr1  | 33314163  | 33322750  | 0.0289185 | chr1:033315 | 0.0289185 |
| PTPN13    | 893 chr4  | 87730552  | 87737316  | 0.028938  | chr4:087735 | 0.028938  |

|          |            |           |           |           |             |           |
|----------|------------|-----------|-----------|-----------|-------------|-----------|
| ACHE     | 894 chr7   | 100325676 | 100336893 | 0.0289466 | chr7:100328 | 0.0289466 |
| RECK     | 901 chr9   | 36021465  | 36029451  | 0.0289649 | chr9:036021 | 0.0289649 |
| FLJ35220 | 902 chr17  | 76002476  | 76006307  | 0.0289663 | chr17:07600 | 0.0289663 |
| LYNX1    | 904 chr8   | 143845794 | 143863108 | 0.0289748 | chr8:143854 | 0.0289748 |
| MALL     | 909 chr2   | 110229055 | 110236890 | 0.0290137 | chr2:110229 | 0.0290137 |
| SLC9A3R1 | 913 chr17  | 70255251  | 70259085  | 0.029024  | chr17:07025 | 0.029024  |
| PRUNE2   | 914 chr9   | 78708204  | 78716294  | 0.0290443 | chr9:078710 | 0.0290443 |
| ZNRD1    | 915 chr6   | 30132263  | 30140553  | 0.0290445 | chr6:030132 | 0.0290445 |
| STX1A    | 919 chr7   | 72769670  | 72775321  | 0.0290837 | chr7:072770 | 0.0290837 |
| PAX8     | 922 chr2   | 113750637 | 113758030 | 0.0291013 | chr2:113751 | 0.0291013 |
| GF11     | 926 chr1   | 92721931  | 92730518  | 0.0291083 | chr1:092722 | 0.0291083 |
| PDE10A   | 929 chr6   | 165907538 | 166001105 | 0.0291277 | chr6:165907 | 0.0291277 |
| INTS6    | 934 chr13  | 50922329  | 50930566  | 0.0291753 | chr13:05092 | 0.0291753 |
| PAQR6    | 937 chr1   | 154479800 | 154485645 | 0.0291896 | chr1:154482 | 0.0291896 |
| GAA      | 938 chr17  | 75684378  | 75692108  | 0.0291965 | chr17:07568 | 0.0291965 |
| C9orf165 | 940 chr9   | 34511279  | 34516406  | 0.0292012 | chr9:034511 | 0.0292012 |
| ATP1B4   | 943 chrX   | 119375155 | 119382537 | 0.0292471 | chrX:119380 | 0.0292471 |
| DEF6     | 944 chr6   | 35371784  | 35375742  | 0.0292858 | chr6:035371 | 0.0292858 |
| PIM1     | 948 chr6   | 37242028  | 37248846  | 0.0293121 | chr6:037242 | 0.0293121 |
| MAD2L1   | 950 chr4   | 121204822 | 121212119 | 0.0293571 | chr4:121204 | 0.0293571 |
| AJAP1    | 952 chr1   | 4609689   | 4617856   | 0.0293688 | chr1:004610 | 0.0293688 |
| ZNF672   | 954 chr1   | 247096846 | 247110531 | 0.0293794 | chr1:247096 | 0.0293794 |
| HNRPU    | 957 chr1   | 243091563 | 243099958 | 0.0294159 | chr1:243091 | 0.0294159 |
| BNIP3    | 961 chr10  | 133642918 | 133649844 | 0.029464  | chr10:13364 | 0.029464  |
| STYXL1   | 963 chr7   | 75463716  | 75515273  | 0.0295209 | chr7:075514 | 0.0295209 |
| RSPO1    | 964 chr1   | 37870424  | 37877718  | 0.0295438 | chr1:037872 | 0.0295438 |
| MANBA    | 967 chr4   | 103899029 | 103904029 | 0.0295619 | chr4:103900 | 0.0295619 |
| ALMS1    | 968 chr2   | 73461114  | 73467500  | 0.0295715 | chr2:073466 | 0.0295715 |
| SHE      | 975 chr1   | 152738178 | 152741009 | 0.0296241 | chr1:152740 | 0.0296241 |
| F11R     | 979 chr1   | 159255250 | 159275518 | 0.0296438 | chr1:159274 | 0.0296438 |
| C9orf150 | 980 chr9   | 12759998  | 12768235  | 0.0296598 | chr9:012768 | 0.0296598 |
| TCP11    | 981 chr6   | 35215115  | 35222582  | 0.0296616 | chr6:035215 | 0.0296616 |
| HYAL3    | 984 chr3   | 50305311  | 50312025  | 0.0296711 | chr3:050305 | 0.0296711 |
| RPESP    | 987 chr8   | 74165699  | 74173317  | 0.0297102 | chr8:074165 | 0.0297102 |
| MZF1     | 992 chr19  | 63765221  | 63776694  | 0.0297176 | chr19:06377 | 0.0297176 |
| GALR2    | 993 chr17  | 71582629  | 71585117  | 0.0297271 | chr17:07158 | 0.0297271 |
| UHRF2    | 995 chr9   | 6397808   | 6405876   | 0.0297341 | chr9:006404 | 0.0297341 |
| RD3      | 996 chr1   | 209729968 | 209738380 | 0.0297404 | chr1:209737 | 0.0297404 |
| DFFB     | 997 chr1   | 3763777   | 3766314   | 0.0297462 | chr1:003763 | 0.0297462 |
| CACNA1S  | 1000 chr1  | 199345708 | 199353834 | 0.0297528 | chr1:199347 | 0.0297528 |
| TKTL1    | 1002 chrX  | 153177364 | 153178011 | 0.0297688 | chrX:153177 | 0.0297688 |
| PCSK5    | 1008 chr9  | 77691415  | 77698323  | 0.0298003 | chr9:077696 | 0.0298003 |
| HHLA3    | 1009 chr1  | 70593103  | 70598444  | 0.029814  | chr1:070593 | 0.029814  |
| WASF1    | 1017 chr6  | 110602877 | 110607745 | 0.0298847 | chr6:110607 | 0.0298847 |
| USH1G    | 1019 chr17 | 70427056  | 70430954  | 0.0299087 | chr17:07043 | 0.0299087 |
| PSMD9    | 1021 chr12 | 120805791 | 120840097 | 0.0299199 | chr12:12080 | 0.0299199 |
| SYNGAP1  | 1024 chr6  | 33496407  | 33529454  | 0.0299535 | chr6:033496 | 0.0299535 |
| TMEM54   | 1025 chr1  | 33138174  | 33145050  | 0.0299591 | chr1:033138 | 0.0299591 |
| NSMAF    | 1030 chr8  | 59732551  | 59738058  | 0.0300194 | chr8:059733 | 0.0300194 |
| PRRX2    | 1033 chr9  | 131462992 | 131470404 | 0.0300647 | chr9:131466 | 0.0300647 |
| NPAS1    | 1034 chr19 | 52210579  | 52218617  | 0.0300839 | chr19:05221 | 0.0300839 |
| KEAP1    | 1036 chr19 | 10470241  | 10477429  | 0.0300963 | chr19:01047 | 0.0300963 |
| HELT     | 1037 chr4  | 186171689 | 186179995 | 0.0300964 | chr4:186171 | 0.0300964 |
| EXOC8    | 1040 chr1  | 229534189 | 229540149 | 0.0301117 | chr1:229538 | 0.0301117 |
| LDOC1    | 1048 chrX  | 140096373 | 140104028 | 0.0301792 | chrX:140096 | 0.0301792 |
| FZD10    | 1050 chr12 | 129207614 | 129215918 | 0.0302045 | chr12:12920 | 0.0302045 |
| C6orf122 | 1053 chr6  | 169928766 | 169944517 | 0.0302218 | chr6:169932 | 0.0302218 |
| TCEA1    | 1055 chr8  | 55095034  | 55099508  | 0.0302285 | chr8:055099 | 0.0302285 |

|          |            |           |           |           |             |           |
|----------|------------|-----------|-----------|-----------|-------------|-----------|
| SORCS2   | 1058 chr4  | 7239809   | 7247794   | 0.0302314 | chr4:007246 | 0.0302314 |
| BAPX1    | 1060 chr4  | 13152931  | 13160184  | 0.0302637 | chr4:013155 | 0.0302637 |
| C1orf117 | 1063 chr1  | 16270197  | 16278195  | 0.030273  | chr1:01627  | 0.030273  |
| FAM91A1  | 1064 chr8  | 124844697 | 124862609 | 0.0302742 | chr8:124850 | 0.0302742 |
| EGLN3    | 1068 chr14 | 33487325  | 33495445  | 0.0302921 | chr14:03348 | 0.0302921 |
| FBXL12   | 1069 chr19 | 9788997   | 9790630   | 0.0302953 | chr19:00978 | 0.0302953 |
| ADAMTS13 | 1075 chr9  | 135277055 | 135314238 | 0.0303214 | chr9:135314 | 0.0303214 |
| TJAP1    | 1078 chr6  | 43548991  | 43556075  | 0.0303748 | chr6:043555 | 0.0303748 |
| KCNK2    | 1079 chr1  | 213317890 | 213325874 | 0.0303779 | chr1:213325 | 0.0303779 |
| EPB41    | 1084 chr1  | 29081055  | 29188806  | 0.0304048 | chr1:029114 | 0.0304048 |
| NPR3     | 1086 chr5  | 32743032  | 32822994  | 0.0304235 | chr5:032748 | 0.0304235 |
| LIMA1    | 1090 chr12 | 48961155  | 48968652  | 0.0304455 | chr12:04896 | 0.0304455 |
| FHL2     | 1091 chr2  | 105379649 | 105426859 | 0.0304558 | chr2:10538  | 0.0304558 |
| GANAB    | 1092 chr11 | 62149374  | 62170743  | 0.0304584 | chr11:06217 | 0.0304584 |
| BID      | 1094 chr22 | 16610501  | 16642651  | 0.030482  | chr22:0166  | 0.030482  |
| MAP3K7   | 1095 chr6  | 91350799  | 91359082  | 0.0304883 | chr6:091355 | 0.0304883 |
| SLURP1   | 1096 chr8  | 143818377 | 143828561 | 0.0304911 | chr8:143820 | 0.0304911 |
| TCF21    | 1098 chr6  | 134246927 | 134254747 | 0.0304967 | chr6:134255 | 0.0304967 |
| GPR85    | 1099 chr7  | 112512654 | 112520541 | 0.0304979 | chr7:112514 | 0.0304979 |
| L1CAM    | 1100 chrX  | 152792001 | 152794370 | 0.0305035 | chrX:15279  | 0.0305035 |
| PDE6A    | 1102 chr5  | 149303910 | 149309219 | 0.0305212 | chr5:149304 | 0.0305212 |
| SEPW1    | 1103 chr19 | 52968978  | 52976259  | 0.0305273 | chr19:05297 | 0.0305273 |
| PAX7     | 1105 chr1  | 18824807  | 18833022  | 0.0305391 | chr1:018833 | 0.0305391 |
| ANAPC2   | 1109 chr9  | 139189036 | 139202733 | 0.0305843 | chr9:139200 | 0.0305843 |
| PTK7     | 1110 chr6  | 43150808  | 43154714  | 0.0305873 | chr6:043155 | 0.0305873 |
| FEV      | 1112 chr2  | 219555843 | 219563147 | 0.0306237 | chr2:219555 | 0.0306237 |
| UCHL1    | 1122 chr4  | 40949654  | 40956242  | 0.0306907 | chr4:040954 | 0.0306907 |
| C6orf1   | 1124 chr6  | 34322388  | 34326058  | 0.0307047 | chr6:034323 | 0.0307047 |
| NUP35    | 1125 chr2  | 183692256 | 183699789 | 0.030711  | chr2:183697 | 0.030711  |
| INHBA    | 1126 chr7  | 41703984  | 41714534  | 0.0307161 | chr7:041706 | 0.0307161 |
| USP33    | 1137 chr1  | 77982628  | 78003508  | 0.0308099 | chr1:077997 | 0.0308099 |
| HBXIP    | 1141 chr1  | 110750422 | 110757196 | 0.0308422 | chr1:110751 | 0.0308422 |
| DRB1     | 1142 chr2  | 178685477 | 178687516 | 0.0308448 | chr2:178688 | 0.0308448 |
| ADHFE1   | 1146 chr8  | 67505946  | 67509318  | 0.0308544 | chr8:067507 | 0.0308544 |
| MIF      | 1148 chr22 | 22561213  | 22569094  | 0.0308893 | chr22:02256 | 0.0308893 |
| SGPP2    | 1149 chr2  | 222993203 | 223000055 | 0.0308898 | chr2:222997 | 0.0308898 |
| C6orf166 | 1150 chr6  | 88465848  | 88474128  | 0.0308921 | chr6:088467 | 0.0308921 |
| CLEC14A  | 1151 chr14 | 37792591  | 37798100  | 0.0308953 | chr14:03779 | 0.0308953 |
| TMSB4Y   | 1155 chrY  | 14319629  | 14327752  | 0.0309042 | chrY:014321 | 0.0309042 |
| RASAL2   | 1157 chr1  | 176325311 | 176579828 | 0.0309073 | chr1:176330 | 0.0309073 |
| RFXANK   | 1159 chr19 | 19163998  | 19169429  | 0.030917  | chr19:01916 | 0.030917  |
| PCDH12   | 1163 chr5  | 141315179 | 141318354 | 0.0309642 | chr5:141317 | 0.0309642 |
| MATN1    | 1165 chr1  | 30966872  | 30974961  | 0.0309751 | chr1:030968 | 0.0309751 |
| CPNE7    | 1166 chr16 | 88164454  | 88172332  | 0.0309871 | chr16:08817 | 0.0309871 |
| ERCC4    | 1167 chr16 | 13916979  | 13923604  | 0.0310038 | chr16:01392 | 0.0310038 |
| LMNB2    | 1170 chr19 | 2379136   | 2413401   | 0.0310236 | chr19:00240 | 0.0310236 |
| GABRB1   | 1171 chr4  | 46723400  | 46730859  | 0.0310258 | chr4:046723 | 0.0310258 |
| ETNK2    | 1173 chr1  | 202385101 | 202390517 | 0.0310328 | chr1:202388 | 0.0310328 |
| ZC3H12A  | 1175 chr1  | 37709510  | 37716102  | 0.0310649 | chr1:037714 | 0.0310649 |
| TOR3A    | 1177 chr1  | 177312520 | 177319982 | 0.0310716 | chr1:177318 | 0.0310716 |
| TWF2     | 1181 chr3  | 52237659  | 52248179  | 0.0310837 | chr3:052239 | 0.0310837 |
| ANKRD34  | 1183 chr1  | 144181884 | 144187023 | 0.0310871 | chr1:144181 | 0.0310871 |
| TPBG     | 1184 chr6  | 83125541  | 83132682  | 0.0310913 | chr6:083132 | 0.0310913 |
| EHHADH   | 1189 chr3  | 186452405 | 186454989 | 0.0311244 | chr3:186454 | 0.0311244 |
| RTCD1    | 1193 chr1  | 100500513 | 100507001 | 0.031152  | chr1:100504 | 0.031152  |
| FAM50A   | 1194 chrX  | 153324987 | 153328201 | 0.0311521 | chrX:15332  | 0.0311521 |
| MAPK15   | 1196 chr8  | 144865010 | 144872955 | 0.0311674 | chr8:144872 | 0.0311674 |
| CD6      | 1199 chr11 | 60490694  | 60498256  | 0.0311844 | chr11:06049 | 0.0311844 |

|           |      |       |           |           |           |             |           |
|-----------|------|-------|-----------|-----------|-----------|-------------|-----------|
| OBSCN     | 1200 | chr1  | 226457255 | 226473382 | 0.0311844 | chr1:226466 | 0.0311844 |
| RNF12     | 1212 | chrX  | 73748667  | 73756510  | 0.0312543 | chrX:073751 | 0.0312543 |
| CENPB     | 1213 | chr20 | 3712505   | 3715106   | 0.0312571 | chr20:0037  | 0.0312571 |
| TLL1      | 1214 | chr4  | 167008518 | 167016934 | 0.0312573 | chr4:167011 | 0.0312573 |
| TRIP6     | 1215 | chr7  | 100302616 | 100308958 | 0.0312588 | chr7:100303 | 0.0312588 |
| PPP2R5A   | 1217 | chr1  | 210520799 | 210528561 | 0.0312669 | chr1:210521 | 0.0312669 |
| FLJ32063  | 1219 | chr2  | 200042947 | 200045383 | 0.0312883 | chr2:200041 | 0.0312883 |
| IL11RA    | 1220 | chr9  | 34640675  | 34651576  | 0.031292  | chr9:03465  | 0.031292  |
| DEFB1     | 1221 | chr8  | 6721818   | 6728071   | 0.0313039 | chr8:006721 | 0.0313039 |
| PRMT6     | 1222 | chr1  | 107395664 | 107403315 | 0.0313122 | chr1:10740  | 0.0313122 |
| EPHA3     | 1226 | chr3  | 89234101  | 89242034  | 0.0313295 | chr3:089231 | 0.0313295 |
| CAMK4     | 1230 | chr5  | 110584201 | 110590592 | 0.031356  | chr5:110581 | 0.031356  |
| MAP2K1IP1 | 1232 | chr4  | 101032268 | 101039455 | 0.0313642 | chr4:101031 | 0.0313642 |
| ABHD11    | 1233 | chr7  | 72788870  | 72796128  | 0.0313651 | chr7:072781 | 0.0313651 |
| CYB5D2    | 1236 | chr17 | 3993714   | 3995787   | 0.0313753 | chr17:00391 | 0.0313753 |
| PIAS1     | 1239 | chr15 | 66132793  | 66136101  | 0.03138   | chr15:06611 | 0.03138   |
| MGC26733  | 1243 | chr2  | 98064908  | 98230344  | 0.0313999 | chr2:098071 | 0.0313999 |
| LOC255374 | 1244 | chr7  | 99561061  | 99564115  | 0.0314061 | chr7:099561 | 0.0314061 |
| LRP8      | 1248 | chr1  | 53563829  | 53570676  | 0.0314555 | chr1:053561 | 0.0314555 |
| PKDREJ    | 1249 | chr22 | 45030224  | 45037650  | 0.0314728 | chr22:04501 | 0.0314728 |
| SPON2     | 1252 | chr4  | 1153518   | 1161809   | 0.0314961 | chr4:001151 | 0.0314961 |
| SRFBP1    | 1254 | chr5  | 121322240 | 121327697 | 0.0315056 | chr5:121321 | 0.0315056 |
| CRABP2    | 1256 | chr1  | 154939464 | 154947415 | 0.0315294 | chr1:154941 | 0.0315294 |
| LAMB2     | 1257 | chr3  | 49133527  | 49150865  | 0.0315342 | chr3:049141 | 0.0315342 |
| ITGA2     | 1258 | chr5  | 52315565  | 52323510  | 0.0315465 | chr5:052321 | 0.0315465 |
| TBC1D10A  | 1261 | chr22 | 29017972  | 29057956  | 0.0315654 | chr22:02901 | 0.0315654 |
| MAPK11    | 1262 | chr22 | 49044414  | 49056391  | 0.0315656 | chr22:04901 | 0.0315656 |
| TNNI1     | 1268 | chr1  | 199639818 | 199662597 | 0.0316015 | chr1:199651 | 0.0316015 |
| GNAS      | 1269 | chr20 | 56842817  | 56902589  | 0.0316072 | chr20:05681 | 0.0316072 |
| SEMA6D    | 1270 | chr15 | 45792625  | 45800484  | 0.0316081 | chr15:04571 | 0.0316081 |
| NFKBIL2   | 1271 | chr8  | 145625421 | 145646001 | 0.031613  | chr8:145631 | 0.031613  |
| RPS6KA1   | 1273 | chr1  | 26723744  | 26731199  | 0.0316269 | chr1:026731 | 0.0316269 |
| PDE6B     | 1274 | chr4  | 604199    | 655011    | 0.0316281 | chr4:000601 | 0.0316281 |
| INTS10    | 1275 | chr8  | 19715290  | 19724352  | 0.0316422 | chr8:019711 | 0.0316422 |
| AHR       | 1276 | chr7  | 17299454  | 17307812  | 0.0316479 | chr7:017301 | 0.0316479 |
| KLF11     | 1277 | chr2  | 10095634  | 10103757  | 0.0316534 | chr2:010101 | 0.0316534 |
| SIX2      | 1278 | chr2  | 45087362  | 45095509  | 0.0316553 | chr2:045081 | 0.0316553 |
| LOC346157 | 1282 | chr6  | 27463843  | 27466914  | 0.0316816 | chr6:027461 | 0.0316816 |
| TSCOT     | 1283 | chr9  | 114690461 | 114698262 | 0.0316895 | chr9:114691 | 0.0316895 |
| LRRC14    | 1286 | chr8  | 145714192 | 145718490 | 0.0316996 | chr8:145711 | 0.0316996 |
| RREB1     | 1287 | chr6  | 7079314   | 7086958   | 0.0317014 | chr6:007081 | 0.0317014 |
| UBXD3     | 1288 | chr1  | 20379841  | 20387683  | 0.0317028 | chr1:020381 | 0.0317028 |
| PODN      | 1289 | chr1  | 53295240  | 53302987  | 0.0317049 | chr1:053301 | 0.0317049 |
| DHCR24    | 1290 | chr1  | 55123415  | 55130946  | 0.0317071 | chr1:055121 | 0.0317071 |
| PDHB      | 1291 | chr3  | 58392492  | 58396883  | 0.0317078 | chr3:058391 | 0.0317078 |
| 2'-PDE    | 1293 | chr3  | 57516638  | 57518968  | 0.0317126 | chr3:057511 | 0.0317126 |
| LMO4      | 1295 | chr1  | 87561350  | 87572781  | 0.0317682 | chr1:087561 | 0.0317682 |
| MRM1      | 1300 | chr17 | 32031471  | 32033710  | 0.0318175 | chr17:03201 | 0.0318175 |
| AP3B1     | 1301 | chr5  | 77623959  | 77630923  | 0.0318358 | chr5:077621 | 0.0318358 |
| FLJ10357  | 1302 | chr14 | 20603336  | 20610754  | 0.0318393 | chr14:02061 | 0.0318393 |
| CCND1     | 1303 | chr11 | 69159563  | 69167767  | 0.0318404 | chr11:06911 | 0.0318404 |
| C4orf14   | 1305 | chr4  | 57534402  | 57538411  | 0.0318681 | chr4:057531 | 0.0318681 |
| DACH1     | 1307 | chr13 | 71336510  | 71344836  | 0.0318802 | chr13:07131 | 0.0318802 |
| MSX2      | 1310 | chr5  | 174079018 | 174086779 | 0.0318891 | chr5:174081 | 0.0318891 |
| IRAK1BP1  | 1312 | chr6  | 79628508  | 79636147  | 0.0319016 | chr6:079631 | 0.0319016 |
| MYO1G     | 1313 | chr7  | 44982788  | 44990696  | 0.0319088 | chr7:044981 | 0.0319088 |
| NPAL2     | 1314 | chr8  | 99373041  | 99379633  | 0.0319183 | chr8:099371 | 0.0319183 |
| TMEM130   | 1315 | chr7  | 98302953  | 98305503  | 0.0319301 | chr7:098301 | 0.0319301 |



|           |            |           |           |           |              |           |
|-----------|------------|-----------|-----------|-----------|--------------|-----------|
| COPS8     | 1319 chr2  | 237655252 | 237661693 | 0.0319422 | chr2:237655  | 0.0319422 |
| CSF3R     | 1320 chr1  | 36704333  | 36726539  | 0.0319495 | chr1:036720  | 0.0319495 |
| PELI2     | 1321 chr14 | 55651541  | 55657576  | 0.0319814 | chr14:055651 | 0.0319814 |
| GRB7      | 1323 chr17 | 35147698  | 35150573  | 0.0320041 | chr17:035147 | 0.0320041 |
| P2RY4     | 1325 chrX  | 69393674  | 69396321  | 0.0320271 | chrX:069393  | 0.0320271 |
| ST8SIA5   | 1331 chr18 | 42588001  | 42596460  | 0.0320521 | chr18:042588 | 0.0320521 |
| FBXO11    | 1333 chr2  | 47984014  | 47991158  | 0.032054  | chr2:047984  | 0.032054  |
| LOC283951 | 1338 chr16 | 1410040   | 1424845   | 0.0320858 | chr16:001410 | 0.0320858 |
| WDR40A    | 1340 chr9  | 34114115  | 34121989  | 0.0320891 | chr9:034111  | 0.0320891 |
| ZMPSTE24  | 1346 chr1  | 40490866  | 40499009  | 0.0321209 | chr1:040490  | 0.0321209 |
| SREBF1    | 1350 chr17 | 17678519  | 17686362  | 0.0321359 | chr17:017678 | 0.0321359 |
| ANK1      | 1353 chr8  | 41639431  | 41777281  | 0.0321562 | chr8:041639  | 0.0321562 |
| EBNA1BP2  | 1354 chr1  | 43405242  | 43410444  | 0.0321651 | chr1:043405  | 0.0321651 |
| TMIE      | 1358 chr3  | 46717838  | 46720114  | 0.032206  | chr3:046717  | 0.032206  |
| WDR51A    | 1362 chr3  | 52162397  | 52164128  | 0.0322134 | chr3:052162  | 0.0322134 |
| GTF3C1    | 1363 chr16 | 27463593  | 27468724  | 0.0322191 | chr16:027463 | 0.0322191 |
| TNFRSF14  | 1365 chr1  | 2484066   | 2491631   | 0.0322219 | chr1:002484  | 0.0322219 |
| INTS7     | 1370 chr1  | 210270656 | 210275452 | 0.0323027 | chr1:210270  | 0.0323027 |
| NPPA      | 1374 chr1  | 11828243  | 11839974  | 0.0323371 | chr1:011828  | 0.0323371 |
| HYI       | 1375 chr1  | 43689524  | 43695443  | 0.0323383 | chr1:043689  | 0.0323383 |
| CCDC115   | 1378 chr2  | 130811074 | 130816384 | 0.0323667 | chr2:130811  | 0.0323667 |
| RQCD1     | 1379 chr2  | 219142005 | 219146715 | 0.0323719 | chr2:219142  | 0.0323719 |
| GFER      | 1380 chr16 | 1974165   | 1977754   | 0.0323807 | chr16:001974 | 0.0323807 |
| VEGFA     | 1381 chr6  | 43840597  | 43849432  | 0.0323832 | chr6:043840  | 0.0323832 |
| SLC35F5   | 1382 chr2  | 114228533 | 114236388 | 0.0323849 | chr2:114228  | 0.0323849 |
| CDS2      | 1385 chr20 | 5055574   | 5060689   | 0.0324129 | chr20:005055 | 0.0324129 |
| BCOR      | 1388 chrX  | 39839089  | 39847042  | 0.0324201 | chrX:039839  | 0.0324201 |
| C8orf40   | 1392 chr8  | 42510559  | 42516242  | 0.0324534 | chr8:042510  | 0.0324534 |
| ORC2L     | 1393 chr2  | 201534679 | 201542106 | 0.0324544 | chr2:201534  | 0.0324544 |
| TCF2      | 1395 chr17 | 33176481  | 33183343  | 0.0324625 | chr17:033176 | 0.0324625 |
| CDX2      | 1396 chr13 | 27438763  | 27446718  | 0.0324647 | chr13:027438 | 0.0324647 |
| GFM1      | 1397 chr3  | 159844749 | 159847484 | 0.0324776 | chr3:159844  | 0.0324776 |
| ANKRD13D  | 1399 chr11 | 66811001  | 66826474  | 0.032488  | chr11:066811 | 0.032488  |
| NEIL2     | 1400 chr8  | 11658263  | 11666834  | 0.0324919 | chr8:011658  | 0.0324919 |
| CCDC66    | 1401 chr3  | 56566031  | 56568745  | 0.0324951 | chr3:056566  | 0.0324951 |
| GNA14     | 1405 chr9  | 79450209  | 79458327  | 0.0325272 | chr9:079450  | 0.0325272 |
| PEBP4     | 1407 chr8  | 22839142  | 22845534  | 0.0325355 | chr8:022839  | 0.0325355 |
| CCDC41    | 1408 chr12 | 93375330  | 93380282  | 0.032538  | chr12:093375 | 0.032538  |
| ENG       | 1409 chr9  | 129654079 | 129661532 | 0.0325394 | chr9:129654  | 0.0325394 |
| C10orf46  | 1410 chr10 | 120502368 | 120508462 | 0.0325426 | chr10:120502 | 0.0325426 |
| TMEM14B   | 1414 chr6  | 10851423  | 10858412  | 0.0325666 | chr6:010851  | 0.0325666 |
| C6orf25   | 1417 chr6  | 31793608  | 31801483  | 0.032592  | chr6:031793  | 0.032592  |
| NRM       | 1427 chr6  | 30764355  | 30769809  | 0.0326602 | chr6:030764  | 0.0326602 |
| PLA2G2A   | 1432 chr1  | 20177121  | 20180844  | 0.0326976 | chr1:020177  | 0.0326976 |
| EVX1      | 1434 chr7  | 27243501  | 27251650  | 0.0327008 | chr7:027243  | 0.0327008 |
| ZNF684    | 1435 chr1  | 40767703  | 40772060  | 0.0327111 | chr1:040767  | 0.0327111 |
| HMGB2     | 1437 chr4  | 174489243 | 174497577 | 0.0327201 | chr4:174489  | 0.0327201 |
| KCNS2     | 1443 chr8  | 99503204  | 99511883  | 0.0327682 | chr8:099503  | 0.0327682 |
| IRF2      | 1445 chr4  | 185584902 | 185637941 | 0.0328243 | chr4:185584  | 0.0328243 |
| C5orf35   | 1449 chr5  | 56236803  | 56243424  | 0.0328436 | chr5:056236  | 0.0328436 |
| ITGAL     | 1453 chr16 | 30386685  | 30393632  | 0.0328589 | chr16:030386 | 0.0328589 |
| MYL3      | 1454 chr3  | 46877458  | 46883991  | 0.0328698 | chr3:046877  | 0.0328698 |
| FLJ20245  | 1457 chr9  | 139288143 | 139295471 | 0.0328888 | chr9:139288  | 0.0328888 |
| APOB48R   | 1458 chr16 | 28413675  | 28416354  | 0.0328921 | chr16:028413 | 0.0328921 |
| TIGD5     | 1459 chr8  | 144751559 | 144755074 | 0.0328963 | chr8:144751  | 0.0328963 |
| PCDHGC5   | 1460 chr5  | 140847721 | 140851432 | 0.0329093 | chr5:140847  | 0.0329093 |
| FIP1L1    | 1464 chr4  | 53937621  | 53940799  | 0.0329687 | chr4:053937  | 0.0329687 |
| RGS3      | 1465 chr9  | 115259756 | 115399042 | 0.0329855 | chr9:115259  | 0.0329855 |

|          |            |           |           |           |                           |           |
|----------|------------|-----------|-----------|-----------|---------------------------|-----------|
| SLC5A8   | 1466 chr12 | 100125381 | 100131557 | 0.0329889 | chr12:100125381-100131557 | 0.0329889 |
| MARCH4   | 1475 chr2  | 216942477 | 216949579 | 0.0330498 | chr2:216942477-216949579  | 0.0330498 |
| CHRD     | 1476 chr3  | 185581191 | 185584049 | 0.0330738 | chr3:185581191-185584049  | 0.0330738 |
| VCPIP1   | 1480 chr8  | 67736959  | 67741894  | 0.0330908 | chr8:67736959-67741894    | 0.0330908 |
| ARMCX1   | 1485 chrX  | 100688175 | 100694752 | 0.0331203 | chrX:100688175-100694752  | 0.0331203 |
| MRPS36   | 1494 chr5  | 68544480  | 68561659  | 0.033205  | chr5:68544480-68561659    | 0.033205  |
| SMG5     | 1496 chr1  | 154485849 | 154519028 | 0.0332207 | chr1:154485849-154519028  | 0.0332207 |
| C14orf4  | 1503 chr14 | 76561504  | 76570139  | 0.033261  | chr14:76561504-76570139   | 0.033261  |
| STK38    | 1505 chr6  | 36620703  | 36627862  | 0.0332682 | chr6:36620703-36627862    | 0.0332682 |
| IL1RL2   | 1507 chr2  | 102164480 | 102172497 | 0.0332837 | chr2:102164480-102172497  | 0.0332837 |
| JTB      | 1508 chr1  | 152213987 | 152220714 | 0.0332987 | chr1:152213987-152220714  | 0.0332987 |
| KCNK17   | 1510 chr6  | 39387884  | 39390483  | 0.0333199 | chr6:39387884-39390483    | 0.0333199 |
| DGKE     | 1511 chr17 | 52261227  | 52268852  | 0.0333472 | chr17:52261227-52268852   | 0.0333472 |
| SDC3     | 1514 chr1  | 31120639  | 31159222  | 0.0333903 | chr1:31120639-31159222    | 0.0333903 |
| GPC2     | 1516 chr7  | 99605162  | 99612908  | 0.0334015 | chr7:99605162-99612908    | 0.0334015 |
| SLC39A1  | 1517 chr1  | 152198309 | 152206551 | 0.0334026 | chr1:152198309-152206551  | 0.0334026 |
| CENTD3   | 1520 chr5  | 141013143 | 141047189 | 0.0334206 | chr5:141013143-141047189  | 0.0334206 |
| RNASEH2B | 1521 chr13 | 50376724  | 50384343  | 0.0334228 | chr13:50376724-50384343   | 0.0334228 |
| MAP6D1   | 1524 chr3  | 185024507 | 185029533 | 0.0334476 | chr3:185024507-185029533  | 0.0334476 |
| PITX2    | 1526 chr4  | 111760752 | 111783483 | 0.0334675 | chr4:111760752-111783483  | 0.0334675 |
| FSCN1    | 1529 chr7  | 5594558   | 5601369   | 0.0334784 | chr7:5594558-5601369      | 0.0334784 |
| UCHL5    | 1533 chr1  | 191290477 | 191295026 | 0.0335179 | chr1:191290477-191295026  | 0.0335179 |
| RHBDL1   | 1539 chr16 | 664395    | 668276    | 0.0335421 | chr16:664395-668276       | 0.0335421 |
| TSPAN12  | 1540 chr7  | 120283117 | 120290922 | 0.0335517 | chr7:120283117-120290922  | 0.0335517 |
| FCHSD1   | 1541 chr5  | 141000944 | 141011717 | 0.0335572 | chr5:141000944-141011717  | 0.0335572 |
| CCDC64   | 1543 chr12 | 118908450 | 118914152 | 0.0335716 | chr12:118908450-118914152 | 0.0335716 |
| HIPK1    | 1544 chr1  | 114268268 | 114321915 | 0.0335741 | chr1:114268268-114321915  | 0.0335741 |
| RASSF5   | 1545 chr1  | 204747564 | 204799997 | 0.0335812 | chr1:204747564-204799997  | 0.0335812 |
| TMEM168  | 1549 chr7  | 112209687 | 112222165 | 0.0335913 | chr7:112209687-112222165  | 0.0335913 |
| FLJ20152 | 1550 chr5  | 16559799  | 16675545  | 0.0335985 | chr5:16559799-16675545    | 0.0335985 |
| VAX1     | 1554 chr10 | 118885157 | 118893254 | 0.0336289 | chr10:118885157-118893254 | 0.0336289 |
| UBE2J2   | 1555 chr1  | 1191252   | 1198986   | 0.0336342 | chr1:1191252-1198986      | 0.0336342 |
| TMEM63B  | 1562 chr6  | 44203425  | 44231024  | 0.0336775 | chr6:44203425-44231024    | 0.0336775 |
| INSRR    | 1564 chr1  | 155092773 | 155095139 | 0.0336852 | chr1:155092773-155095139  | 0.0336852 |
| PPP2R3B  | 1566 chrY  | 219151    | 273152    | 0.0336909 | chrY:219151-273152        | 0.0336909 |
| RSPO2    | 1567 chr8  | 109160982 | 109168013 | 0.0337203 | chr8:109160982-109168013  | 0.0337203 |
| EREG     | 1568 chr4  | 75444369  | 75452339  | 0.033726  | chr4:75444369-75452339    | 0.033726  |
| FBN2     | 1570 chr5  | 127898728 | 127905739 | 0.0337367 | chr5:127898728-127905739  | 0.0337367 |
| KCNN1    | 1571 chr19 | 17940323  | 17947144  | 0.0337426 | chr19:17940323-17947144   | 0.0337426 |
| C9orf117 | 1580 chr9  | 129512793 | 129515591 | 0.0337935 | chr9:129512793-129515591  | 0.0337935 |
| AVPR1B   | 1583 chr1  | 204386194 | 204393499 | 0.0338277 | chr1:204386194-204393499  | 0.0338277 |
| NR2F2    | 1584 chr15 | 94669738  | 94678775  | 0.0338348 | chr15:94669738-94678775   | 0.0338348 |
| IMPDH1   | 1586 chr7  | 127834860 | 127842789 | 0.0338414 | chr7:127834860-127842789  | 0.0338414 |
| GPNMB    | 1589 chr7  | 23247463  | 23254917  | 0.0338499 | chr7:23247463-23254917    | 0.0338499 |
| ADPRH    | 1592 chr3  | 120775688 | 120785771 | 0.0338589 | chr3:120775688-120785771  | 0.0338589 |
| MAFK     | 1594 chr7  | 1533149   | 1547861   | 0.0338969 | chr7:1533149-1547861      | 0.0338969 |
| SNAPC4   | 1595 chr9  | 138389846 | 138415972 | 0.0339019 | chr9:138389846-138415972  | 0.0339019 |
| PCDHGC3  | 1596 chr5  | 140830243 | 140838368 | 0.0339068 | chr5:140830243-140838368  | 0.0339068 |
| LMX1A    | 1598 chr1  | 163446786 | 163597644 | 0.0339154 | chr1:163446786-163597644  | 0.0339154 |
| SETDB1   | 1601 chr1  | 149161484 | 149167672 | 0.0339355 | chr1:149161484-149167672  | 0.0339355 |
| PDLIM2   | 1602 chr8  | 22489061  | 22511408  | 0.033942  | chr8:22489061-22511408    | 0.033942  |
| SLC6A16  | 1603 chr19 | 54519489  | 54520359  | 0.0339669 | chr19:54519489-54520359   | 0.0339669 |
| HABP4    | 1604 chr9  | 98246827  | 98254728  | 0.033968  | chr9:98246827-98254728    | 0.033968  |
| SURF2    | 1605 chr9  | 135213290 | 135217982 | 0.0339709 | chr9:135213290-135217982  | 0.0339709 |
| SNED1    | 1607 chr2  | 241650251 | 241654467 | 0.0339723 | chr2:241650251-241654467  | 0.0339723 |
| ADAMTS15 | 1611 chr11 | 129819035 | 129826572 | 0.0339923 | chr11:129819035-129826572 | 0.0339923 |
| SNIP     | 1616 chr17 | 33966714  | 33974671  | 0.0340154 | chr17:33966714-33974671   | 0.0340154 |
| APBB1IP  | 1622 chr10 | 26764121  | 26770196  | 0.0340301 | chr10:26764121-26770196   | 0.0340301 |

|          |            |           |           |           |             |           |
|----------|------------|-----------|-----------|-----------|-------------|-----------|
| DMRT1    | 1625 chr9  | 827943    | 834363    | 0.0340315 | chr9:000830 | 0.0340315 |
| THAP10   | 1630 chr15 | 68968984  | 68971827  | 0.0340541 | chr15:06890 | 0.0340541 |
| TRIB1    | 1633 chr8  | 126506514 | 126514784 | 0.0340897 | chr8:126514 | 0.0340897 |
| TAS1R2   | 1635 chr1  | 19056293  | 19063965  | 0.0341002 | chr1:019050 | 0.0341002 |
| RORB     | 1637 chr9  | 76296737  | 76305221  | 0.0341123 | chr9:076300 | 0.0341123 |
| ZBTB16   | 1638 chr11 | 113430193 | 113636269 | 0.0341219 | chr11:11343 | 0.0341219 |
| CDKN1A   | 1642 chr6  | 36749657  | 36756881  | 0.0341656 | chr6:036750 | 0.0341656 |
| MYL5     | 1643 chr4  | 661727    | 663613    | 0.0341674 | chr4:000660 | 0.0341674 |
| DUSP7    | 1644 chr3  | 52062878  | 52070663  | 0.0341733 | chr3:052060 | 0.0341733 |
| CENPF    | 1645 chr1  | 212841560 | 212845239 | 0.0341771 | chr1:212840 | 0.0341771 |
| CHTF18   | 1651 chr16 | 778685    | 787708    | 0.0342163 | chr16:00070 | 0.0342163 |
| ZNF498   | 1653 chr7  | 99054916  | 99062092  | 0.0342289 | chr7:099050 | 0.0342289 |
| HEY2     | 1655 chr6  | 126107200 | 126115022 | 0.0342412 | chr6:126110 | 0.0342412 |
| EMILIN1  | 1658 chr2  | 27150472  | 27162794  | 0.0342526 | chr2:027160 | 0.0342526 |
| CDC42EP3 | 1661 chr2  | 37749929  | 37758329  | 0.0342584 | chr2:037750 | 0.0342584 |
| GUK1     | 1662 chr1  | 226394270 | 226403289 | 0.0342595 | chr1:226390 | 0.0342595 |
| DCUN1D4  | 1663 chr4  | 52398675  | 52406521  | 0.0342653 | chr4:052400 | 0.0342653 |
| PPIG     | 1664 chr2  | 170148977 | 170151577 | 0.0342716 | chr2:170140 | 0.0342716 |
| COL23A1  | 1670 chr5  | 177919768 | 177953368 | 0.0342866 | chr5:177940 | 0.0342866 |
| FLJ37078 | 1671 chr7  | 75747054  | 75754926  | 0.03429   | chr7:075750 | 0.03429   |
| SUCLG2   | 1672 chr3  | 67785184  | 67793192  | 0.0342957 | chr3:067780 | 0.0342957 |
| COMMD10  | 1673 chr5  | 115443298 | 115451105 | 0.0342984 | chr5:115440 | 0.0342984 |
| SDCCAG3  | 1676 chr9  | 138416253 | 138424611 | 0.0343133 | chr9:138410 | 0.0343133 |
| TP53I11  | 1679 chr11 | 44926154  | 44934743  | 0.0343407 | chr11:04490 | 0.0343407 |
| SNAPC2   | 1681 chr19 | 7885806   | 7894757   | 0.0343488 | chr19:00780 | 0.0343488 |
| ACBD3    | 1682 chr1  | 224438653 | 224445541 | 0.0343537 | chr1:224440 | 0.0343537 |
| CCNI     | 1684 chr4  | 78213728  | 78221627  | 0.0343631 | chr4:078210 | 0.0343631 |
| MAEA     | 1690 chr4  | 1268236   | 1276243   | 0.0343763 | chr4:001270 | 0.0343763 |
| RAP1GAP  | 1694 chr1  | 21816638  | 21873857  | 0.0344113 | chr1:021810 | 0.0344113 |
| TAF7     | 1697 chr5  | 140677700 | 140680548 | 0.0344324 | chr5:140680 | 0.0344324 |
| RRP9     | 1702 chr3  | 51946278  | 51950942  | 0.0344723 | chr3:051950 | 0.0344723 |
| KIF3A    | 1703 chr5  | 132099138 | 132101154 | 0.0344819 | chr5:132100 | 0.0344819 |
| ZNF200   | 1705 chr16 | 3222717   | 3229401   | 0.0344983 | chr16:00320 | 0.0344983 |
| PPP2R2A  | 1708 chr8  | 26199981  | 26207501  | 0.0345126 | chr8:026200 | 0.0345126 |
| ZIC5     | 1709 chr13 | 99419550  | 99422290  | 0.0345312 | chr13:09940 | 0.0345312 |
| MMRN2    | 1712 chr10 | 88703573  | 88707352  | 0.0345383 | chr10:08870 | 0.0345383 |
| KIAA0274 | 1718 chr6  | 110119177 | 110121907 | 0.0345527 | chr6:110110 | 0.0345527 |
| SFTPC    | 1720 chr8  | 22075189  | 22077721  | 0.0345586 | chr8:022070 | 0.0345586 |
| GPX3     | 1721 chr5  | 150376655 | 150382868 | 0.0345592 | chr5:150380 | 0.0345592 |
| DCAMKL2  | 1722 chr4  | 151214094 | 151222212 | 0.0345594 | chr4:151210 | 0.0345594 |
| LUC7L    | 1726 chr16 | 217153    | 219449    | 0.0345785 | chr16:00020 | 0.0345785 |
| GEMIN6   | 1728 chr2  | 38853471  | 38861974  | 0.0345906 | chr2:038850 | 0.0345906 |
| CHCHD1   | 1731 chr10 | 75206967  | 75212996  | 0.0346323 | chr10:07520 | 0.0346323 |
| HOMER1   | 1733 chr5  | 78842597  | 78850956  | 0.0346392 | chr5:078840 | 0.0346392 |
| CSTF1    | 1735 chr20 | 54400956  | 54406144  | 0.0346463 | chr20:05440 | 0.0346463 |
| C9orf25  | 1737 chr9  | 34388179  | 34448477  | 0.0346496 | chr9:034440 | 0.0346496 |
| DNMT3B   | 1738 chr20 | 30809090  | 30833074  | 0.0346644 | chr20:03080 | 0.0346644 |
| CAMK2B   | 1741 chr7  | 44329366  | 44336758  | 0.034684  | chr7:044330 | 0.034684  |
| PUSL1    | 1742 chr1  | 1233924   | 1236872   | 0.034696  | chr1:001230 | 0.034696  |
| SEZ6L2   | 1743 chr16 | 29814162  | 29818001  | 0.0347049 | chr16:02980 | 0.0347049 |
| SLC35B4  | 1751 chr7  | 133650343 | 133657807 | 0.0347541 | chr7:133650 | 0.0347541 |
| SPAST    | 1753 chr2  | 32137156  | 32144385  | 0.0347643 | chr2:032140 | 0.0347643 |
| ADAMTSL4 | 1761 chr1  | 148783122 | 148790577 | 0.0348091 | chr1:148780 | 0.0348091 |
| EDEM2    | 1765 chr20 | 33196382  | 33203464  | 0.0348374 | chr20:03310 | 0.0348374 |
| OXSM     | 1767 chr3  | 25806672  | 25810040  | 0.0348492 | chr3:025800 | 0.0348492 |
| LYPLA2   | 1768 chr1  | 23987279  | 23992776  | 0.0348669 | chr1:023990 | 0.0348669 |
| DEPDC1B  | 1770 chr5  | 60029355  | 60036365  | 0.0348753 | chr5:060030 | 0.0348753 |
| UBE1DC1  | 1771 chr3  | 133862057 | 133864252 | 0.0348758 | chr3:133860 | 0.0348758 |

|           |            |           |           |           |             |           |
|-----------|------------|-----------|-----------|-----------|-------------|-----------|
| AXUD1     | 1773 chr3  | 39167530  | 39175615  | 0.034901  | chr3:039165 | 0.034901  |
| MCTS1     | 1775 chrX  | 119620136 | 119624282 | 0.03492   | chrX:11962  | 0.03492   |
| NOL4      | 1778 chr18 | 30054784  | 30061524  | 0.0349246 | chr18:03005 | 0.0349246 |
| P117      | 1782 chr19 | 5626988   | 5631753   | 0.0349562 | chr19:00563 | 0.0349562 |
| PRDM16    | 1783 chr1  | 2970209   | 2979633   | 0.034959  | chr1:002970 | 0.034959  |
| PCDHAC2   | 1786 chr5  | 140320799 | 140329035 | 0.034978  | chr5:140320 | 0.034978  |
| C12orf41  | 1787 chr12 | 47359313  | 47367663  | 0.0349785 | chr12:04736 | 0.0349785 |
| HS3ST6    | 1789 chr16 | 1905933   | 1913904   | 0.0349942 | chr16:00190 | 0.0349942 |
| TGFB1     | 1791 chr5  | 135387248 | 135394938 | 0.0349962 | chr5:135394 | 0.0349962 |
| NOL7      | 1792 chr6  | 13720935  | 13726061  | 0.0350163 | chr6:013720 | 0.0350163 |
| PLCXD3    | 1795 chr5  | 41543982  | 41551612  | 0.0350359 | chr5:041543 | 0.0350359 |
| GAMT      | 1797 chr19 | 1350002   | 1352512   | 0.0350625 | chr19:00135 | 0.0350625 |
| SLC25A44  | 1798 chr1  | 154428518 | 154449169 | 0.0350682 | chr1:154448 | 0.0350682 |
| NEU1      | 1801 chr6  | 31936020  | 31938975  | 0.0350807 | chr6:031936 | 0.0350807 |
| RNF20     | 1804 chr9  | 103330570 | 103338478 | 0.0350961 | chr9:103330 | 0.0350961 |
| DNAJC16   | 1806 chr1  | 15725991  | 15728650  | 0.0351011 | chr1:015725 | 0.0351011 |
| RNF207    | 1807 chr1  | 6188493   | 6190916   | 0.0351054 | chr1:006190 | 0.0351054 |
| EEF1D     | 1810 chr8  | 144733301 | 144750583 | 0.0351227 | chr8:144733 | 0.0351227 |
| ESPN      | 1811 chr1  | 6407512   | 6410346   | 0.0351235 | chr1:006407 | 0.0351235 |
| C9orf3    | 1813 chr9  | 96524246  | 96890250  | 0.0351361 | chr9:096888 | 0.0351361 |
| PSME3     | 1815 chr17 | 38239175  | 38249209  | 0.0351561 | chr17:03823 | 0.0351561 |
| PEX1      | 1817 chr7  | 91991911  | 91995761  | 0.0351604 | chr7:091999 | 0.0351604 |
| MYBPC3    | 1819 chr11 | 47328808  | 47334769  | 0.0351668 | chr11:04733 | 0.0351668 |
| KHDRBS3   | 1820 chr8  | 136533614 | 136541780 | 0.0351684 | chr8:136533 | 0.0351684 |
| PPAPDC1B  | 1821 chr8  | 38243459  | 38251271  | 0.0351696 | chr8:038243 | 0.0351696 |
| TMBIM1    | 1822 chr2  | 218863350 | 218870360 | 0.0351701 | chr2:218863 | 0.0351701 |
| TTC7A     | 1823 chr2  | 47016301  | 47024341  | 0.0351722 | chr2:047020 | 0.0351722 |
| SRP9      | 1829 chr1  | 224026641 | 224034360 | 0.0352243 | chr1:224033 | 0.0352243 |
| DKFZp434k | 1835 chr7  | 101892576 | 101897765 | 0.035247  | chr7:101892 | 0.035247  |
| SENP7     | 1836 chr3  | 102712701 | 102719537 | 0.0352509 | chr3:102712 | 0.0352509 |
| MAPK13    | 1837 chr6  | 36201409  | 36208822  | 0.0352644 | chr6:036201 | 0.0352644 |
| TMEM125   | 1838 chr1  | 43504664  | 43511360  | 0.0352662 | chr1:043504 | 0.0352662 |
| DDX18     | 1840 chr2  | 118284735 | 118291281 | 0.0352767 | chr2:118284 | 0.0352767 |
| LOC400258 | 1841 chr14 | 104112433 | 104119684 | 0.0352788 | chr14:10411 | 0.0352788 |
| JMJD2C    | 1844 chr9  | 6742793   | 6749645   | 0.0352796 | chr9:006742 | 0.0352796 |
| STK32B    | 1845 chr4  | 5100353   | 5106317   | 0.0352812 | chr4:005100 | 0.0352812 |
| PROSC     | 1853 chr8  | 37734563  | 37741505  | 0.0353135 | chr8:037733 | 0.0353135 |
| GTF3C5    | 1855 chr9  | 134891420 | 134923658 | 0.0353247 | chr9:134923 | 0.0353247 |
| CSF3      | 1856 chr17 | 35420187  | 35427742  | 0.0353293 | chr17:03542 | 0.0353293 |
| ARHGAP21  | 1859 chr10 | 25050228  | 25057733  | 0.0353486 | chr10:02505 | 0.0353486 |
| C10orf116 | 1866 chr10 | 88713071  | 88720777  | 0.035393  | chr10:08871 | 0.035393  |
| HINT2     | 1871 chr9  | 35802966  | 35807572  | 0.0354411 | chr9:035802 | 0.0354411 |
| LGR4      | 1872 chr11 | 27344156  | 27454150  | 0.0354417 | chr11:02744 | 0.0354417 |
| HSPB6     | 1873 chr19 | 40937294  | 40939608  | 0.035452  | chr19:04093 | 0.035452  |
| HOXC10    | 1875 chr12 | 52659869  | 52670337  | 0.0354558 | chr12:05266 | 0.0354558 |
| SPR       | 1879 chr2  | 72964043  | 72970587  | 0.0354734 | chr2:072964 | 0.0354734 |
| PLEKHA4   | 1888 chr19 | 54032215  | 54063092  | 0.0355273 | chr19:05403 | 0.0355273 |
| NAB2      | 1891 chr12 | 55768852  | 55771806  | 0.0355374 | chr12:05576 | 0.0355374 |
| UBE1L     | 1896 chr3  | 49817531  | 49826766  | 0.0355686 | chr3:049817 | 0.0355686 |
| ACSL4     | 1897 chrX  | 108860853 | 108868658 | 0.0355689 | chrX:108860 | 0.0355689 |
| MLL4      | 1898 chr19 | 40899935  | 40921815  | 0.0355721 | chr19:04090 | 0.0355721 |
| C4orf9    | 1900 chr4  | 2909451   | 2934871   | 0.0355751 | chr4:002934 | 0.0355751 |
| LSR       | 1903 chr19 | 40430586  | 40450726  | 0.0355887 | chr19:04043 | 0.0355887 |
| U65       | 1905 chr9  | 129250624 | 129253391 | 0.0355967 | chr9:129250 | 0.0355967 |
| WNT3A     | 1907 chr1  | 226256253 | 226263895 | 0.0356153 | chr1:226256 | 0.0356153 |
| PIP5KL1   | 1908 chr9  | 129723792 | 129734016 | 0.0356234 | chr9:129723 | 0.0356234 |
| MGC2408   | 1911 chr3  | 185450256 | 185455522 | 0.0356418 | chr3:185450 | 0.0356418 |
| CRY1      | 1912 chr12 | 105909275 | 106016844 | 0.0356586 | chr12:10601 | 0.0356586 |

|           |            |           |           |           |             |           |
|-----------|------------|-----------|-----------|-----------|-------------|-----------|
| MTIF2     | 1914 chr2  | 55317042  | 55349963  | 0.0356636 | chr2:055349 | 0.0356636 |
| TNFAIP8L1 | 1918 chr19 | 4585654   | 4592869   | 0.0356783 | chr19:00459 | 0.0356783 |
| SMAD7     | 1921 chr18 | 44728524  | 44736598  | 0.0356821 | chr18:04473 | 0.0356821 |
| AQP2      | 1926 chr12 | 48625434  | 48638807  | 0.0357187 | chr12:04863 | 0.0357187 |
| LEMD2     | 1927 chr6  | 33862450  | 33870143  | 0.0357206 | chr6:033863 | 0.0357206 |
| RNF130    | 1932 chr5  | 179372715 | 179436732 | 0.035752  | chr5:179437 | 0.035752  |
| COMT      | 1935 chr22 | 18308237  | 18332577  | 0.0357926 | chr22:01833 | 0.0357926 |
| TSPAN15   | 1936 chr10 | 70876411  | 70883773  | 0.0358137 | chr10:07088 | 0.0358137 |
| CTR9      | 1937 chr11 | 10723954  | 10731893  | 0.0358147 | chr11:01072 | 0.0358147 |
| RNF5      | 1939 chr6  | 32254440  | 32256642  | 0.0358287 | chr6:032254 | 0.0358287 |
| HMGNA4    | 1941 chr6  | 26641251  | 26649108  | 0.0358435 | chr6:026644 | 0.0358435 |
| LSP1      | 1942 chr11 | 1825423   | 1833382   | 0.0358444 | chr11:00183 | 0.0358444 |
| HYAL1     | 1947 chr3  | 50312298  | 50317365  | 0.0358792 | chr3:050311 | 0.0358792 |
| NELL1     | 1950 chr11 | 20642793  | 20650336  | 0.0359187 | chr11:02064 | 0.0359187 |
| ZNF385    | 1951 chr12 | 53049263  | 53074629  | 0.0359239 | chr12:05306 | 0.0359239 |
| FNTB      | 1952 chr14 | 64520334  | 64525304  | 0.03593   | chr14:06452 | 0.03593   |
| LRCH4     | 1957 chr7  | 100016528 | 100021712 | 0.0359518 | chr7:100016 | 0.0359518 |
| C2orf40   | 1964 chr2  | 106043060 | 106050328 | 0.0360107 | chr2:106043 | 0.0360107 |
| EXOC1     | 1965 chr4  | 56409213  | 56416517  | 0.0360118 | chr4:056414 | 0.0360118 |
| DOCK11    | 1967 chrX  | 117510503 | 117516374 | 0.0360225 | chrX:117511 | 0.0360225 |
| ADAT1     | 1973 chr16 | 74212197  | 74218136  | 0.0360695 | chr16:07421 | 0.0360695 |
| AGER      | 1974 chr6  | 32256696  | 32260482  | 0.0360703 | chr6:032257 | 0.0360703 |
| CTBP1     | 1977 chr4  | 1228728   | 1232513   | 0.0360928 | chr4:001230 | 0.0360928 |
| SPOCK3    | 1980 chr4  | 168389691 | 168397759 | 0.0360989 | chr4:168397 | 0.0360989 |
| ESAM      | 1981 chr11 | 124128232 | 124141530 | 0.0361002 | chr11:12411 | 0.0361002 |
| FAM127A   | 1982 chrX  | 133993988 | 133996865 | 0.0361002 | chrX:133993 | 0.0361002 |
| RAB6B     | 1984 chr3  | 135094597 | 135101238 | 0.036111  | chr3:135096 | 0.036111  |
| CGN       | 1988 chr1  | 149745102 | 149777721 | 0.0361377 | chr1:149752 | 0.0361377 |
| TBL1Y     | 1990 chrY  | 6836543   | 6954892   | 0.0361417 | chrY:006836 | 0.0361417 |
| MRPL53    | 1993 chr2  | 74552668  | 74554318  | 0.0361609 | chr2:074555 | 0.0361609 |
| SCUBE1    | 1994 chr22 | 42066853  | 42073756  | 0.036165  | chr22:04206 | 0.036165  |
| NT5E      | 1998 chr6  | 86211404  | 86219075  | 0.0361861 | chr6:086211 | 0.0361861 |
| RAB3GAP2  | 2000 chr1  | 218511149 | 218517740 | 0.0361935 | chr1:218511 | 0.0361935 |
| IKBK1     | 2001 chrX  | 153429303 | 153433712 | 0.036224  | chrX:153433 | 0.036224  |
| SH2B3     | 2002 chr12 | 110323460 | 110330281 | 0.0362298 | chr12:11032 | 0.0362298 |
| SNN       | 2003 chr16 | 11664751  | 11679939  | 0.0362336 | chr16:01167 | 0.0362336 |
| TEKT2     | 2005 chr1  | 36317379  | 36326478  | 0.0362538 | chr1:036326 | 0.0362538 |
| ARID3C    | 2009 chr9  | 34611610  | 34615782  | 0.0362648 | chr9:034611 | 0.0362648 |
| U2AF2     | 2012 chr19 | 60856493  | 60877894  | 0.0362768 | chr19:06085 | 0.0362768 |
| OXCT1     | 2019 chr5  | 41903743  | 41911527  | 0.0363208 | chr5:041906 | 0.0363208 |
| PLB1      | 2021 chr2  | 28672937  | 28680789  | 0.0363412 | chr2:028680 | 0.0363412 |
| LOXL4     | 2022 chr10 | 100015727 | 100023442 | 0.0363462 | chr10:10001 | 0.0363462 |
| FBP1      | 2023 chr9  | 96439172  | 96446015  | 0.0363525 | chr9:096444 | 0.0363525 |
| HIST1H3A  | 2026 chr6  | 26128687  | 26128899  | 0.0363577 | chr6:026128 | 0.0363577 |
| C1orf57   | 2031 chr1  | 231147987 | 231154362 | 0.0363893 | chr1:231153 | 0.0363893 |
| SCOTIN    | 2033 chr3  | 48484178  | 48521601  | 0.0364006 | chr3:048516 | 0.0364006 |
| WDR46     | 2034 chr6  | 33354840  | 33364897  | 0.0364044 | chr6:033336 | 0.0364044 |
| KCNV1     | 2040 chr8  | 111053552 | 111061650 | 0.0364368 | chr8:111055 | 0.0364368 |
| BMP2R2    | 2044 chr2  | 202944713 | 202952041 | 0.0364664 | chr2:202950 | 0.0364664 |
| CDCP2     | 2046 chr1  | 54388871  | 54397268  | 0.036473  | chr1:054397 | 0.036473  |
| IGSF21    | 2049 chr1  | 18301792  | 18309696  | 0.0364796 | chr1:018301 | 0.0364796 |
| KCNT1     | 2050 chr9  | 137734236 | 137736647 | 0.0364862 | chr9:137734 | 0.0364862 |
| ADAM19    | 2051 chr5  | 156933790 | 156936755 | 0.0364926 | chr5:156934 | 0.0364926 |
| BDH1      | 2053 chr3  | 198765289 | 198789921 | 0.0365042 | chr3:198765 | 0.0365042 |
| NAPRT1    | 2054 chr8  | 144729415 | 144733023 | 0.036511  | chr8:144729 | 0.036511  |
| ITGAV     | 2056 chr2  | 187158472 | 187165729 | 0.0365303 | chr2:187165 | 0.0365303 |
| THOC1     | 2061 chr18 | 255751    | 263169    | 0.0365478 | chr18:00026 | 0.0365478 |
| RPP21     | 2066 chr6  | 30420120  | 30423275  | 0.0365623 | chr6:030422 | 0.0365623 |

|           |            |           |           |           |                 |           |
|-----------|------------|-----------|-----------|-----------|-----------------|-----------|
| PDGFRB    | 2070 chr5  | 149473709 | 149515943 | 0.0365881 | chr5:149473709  | 0.0365881 |
| ProSAPiP1 | 2073 chr20 | 3091384   | 3106332   | 0.0365961 | chr20:003091384 | 0.0365961 |
| IPO13     | 2074 chr1  | 44175466  | 44206012  | 0.0366142 | chr1:044175466  | 0.0366142 |
| TOM1L1    | 2076 chr17 | 50327703  | 50335544  | 0.0366277 | chr17:050327703 | 0.0366277 |
| GPR30     | 2085 chr7  | 1087532   | 1099929   | 0.0366837 | chr7:001087532  | 0.0366837 |
| ST6GALNA  | 2094 chr17 | 72092385  | 72097670  | 0.0367183 | chr17:072092385 | 0.0367183 |
| USP21     | 2096 chr1  | 159395367 | 159402066 | 0.0367288 | chr1:159395367  | 0.0367288 |
| C1orf106  | 2102 chr1  | 199122958 | 199129687 | 0.0367684 | chr1:199122958  | 0.0367684 |
| THBS3     | 2103 chr1  | 153431871 | 153444259 | 0.0367698 | chr1:153431871  | 0.0367698 |
| RG9MTD3   | 2110 chr9  | 37738951  | 37746297  | 0.0368169 | chr9:037738951  | 0.0368169 |
| RAB42     | 2113 chr1  | 28790655  | 28792813  | 0.0368268 | chr1:028790655  | 0.0368268 |
| ANKRD13B  | 2115 chr17 | 24944808  | 24947160  | 0.0368309 | chr17:024944808 | 0.0368309 |
| IL9R      | 2117 chrY  | 57737572  | 57741833  | 0.0368432 | chrY:057737572  | 0.0368432 |
| MGC35154  | 2118 chr2  | 232163589 | 232167468 | 0.0368435 | chr2:232163589  | 0.0368435 |
| IFNW1     | 2120 chr9  | 21130234  | 21136348  | 0.0368485 | chr9:021130234  | 0.0368485 |
| BAZ1A     | 2134 chr14 | 34412089  | 34419625  | 0.0369327 | chr14:034412089 | 0.0369327 |
| SYTL1     | 2135 chr1  | 27535665  | 27546872  | 0.0369387 | chr1:027535665  | 0.0369387 |
| GPR103    | 2139 chr4  | 122518949 | 122526519 | 0.0369726 | chr4:122518949  | 0.0369726 |
| DPM1      | 2141 chr20 | 48984837  | 49008400  | 0.0369931 | chr20:049008400 | 0.0369931 |
| CISH      | 2147 chr3  | 50621612  | 50624085  | 0.0370206 | chr3:050621612  | 0.0370206 |
| HNRPF     | 2148 chr10 | 43222464  | 43229868  | 0.0370261 | chr10:043222464 | 0.0370261 |
| SHKBP1    | 2156 chr19 | 45774398  | 45788972  | 0.0370558 | chr19:045774398 | 0.0370558 |
| PVRL2     | 2157 chr19 | 50036396  | 50083184  | 0.0370559 | chr19:050036396 | 0.0370559 |
| TBX10     | 2161 chr11 | 67155803  | 67166566  | 0.0370709 | chr11:067155803 | 0.0370709 |
| MFRP      | 2162 chr11 | 118716897 | 118728098 | 0.0370729 | chr11:118716897 | 0.0370729 |
| PRKAG2    | 2168 chr7  | 151140595 | 151210217 | 0.0370968 | chr7:151140595  | 0.0370968 |
| INSM1     | 2169 chr20 | 20291571  | 20299427  | 0.0371131 | chr20:020291571 | 0.0371131 |
| CYP46A1   | 2174 chr14 | 99215260  | 99222392  | 0.0371527 | chr14:099215260 | 0.0371527 |
| KIAA1009  | 2175 chr6  | 84992684  | 84999165  | 0.0371532 | chr6:084992684  | 0.0371532 |
| LOC399947 | 2177 chr11 | 108792753 | 108800643 | 0.0371645 | chr11:108792753 | 0.0371645 |
| SYT6      | 2178 chr1  | 114495532 | 114503500 | 0.0371773 | chr1:114495532  | 0.0371773 |
| PMF1      | 2180 chr1  | 154449304 | 154476477 | 0.0371833 | chr1:154449304  | 0.0371833 |
| BIRC7     | 2183 chr20 | 61334202  | 61340368  | 0.0371866 | chr20:061334202 | 0.0371866 |
| ZNF711    | 2186 chrX  | 84382346  | 84388876  | 0.0372111 | chrX:084382346  | 0.0372111 |
| ZXDC      | 2187 chr3  | 127674430 | 127682000 | 0.0372141 | chr3:127674430  | 0.0372141 |
| CASKIN1   | 2190 chr16 | 2183634   | 2186425   | 0.0372325 | chr16:002183634 | 0.0372325 |
| PDCD10    | 2192 chr3  | 168930778 | 168935294 | 0.0372426 | chr3:168930778  | 0.0372426 |
| ALKBH5    | 2196 chr17 | 18023910  | 18030763  | 0.0372578 | chr17:018023910 | 0.0372578 |
| GNG4      | 2200 chr1  | 233878320 | 233886164 | 0.0372743 | chr1:233878320  | 0.0372743 |
| FNDC4     | 2203 chr2  | 27568258  | 27571578  | 0.037288  | chr2:027568258  | 0.037288  |
| CENPM     | 2205 chr22 | 40671167  | 40678480  | 0.0373095 | chr22:040671167 | 0.0373095 |
| CAB39     | 2206 chr2  | 231285134 | 231288320 | 0.0373175 | chr2:231285134  | 0.0373175 |
| PARP10    | 2207 chr8  | 145123336 | 145132517 | 0.0373225 | chr8:145123336  | 0.0373225 |
| KIF27     | 2208 chr9  | 85724119  | 85730186  | 0.0373233 | chr9:085724119  | 0.0373233 |
| CNOT8     | 2210 chr5  | 154218377 | 154220867 | 0.0373282 | chr5:154218377  | 0.0373282 |
| PCSK4     | 2212 chr19 | 1432417   | 1441250   | 0.0373347 | chr19:001432417 | 0.0373347 |
| C9orf98   | 2217 chr9  | 134738568 | 134743980 | 0.0373842 | chr9:134738568  | 0.0373842 |
| CCNH      | 2218 chr5  | 86741988  | 86749826  | 0.0373849 | chr5:086741988  | 0.0373849 |
| BRI3      | 2219 chr7  | 97743502  | 97751498  | 0.0373854 | chr7:097743502  | 0.0373854 |
| ORC6L     | 2221 chr16 | 45281066  | 45284914  | 0.0373929 | chr16:045281066 | 0.0373929 |
| DDX3X     | 2228 chrX  | 41073229  | 41080686  | 0.0374201 | chrX:041073229  | 0.0374201 |
| ANAPC1    | 2233 chr2  | 112357253 | 112361998 | 0.0374416 | chr2:112357253  | 0.0374416 |
| PLCXD2    | 2244 chr3  | 112870689 | 113057840 | 0.0374884 | chr3:112870689  | 0.0374884 |
| LHX2      | 2246 chr9  | 125808376 | 125816940 | 0.0374944 | chr9:125808376  | 0.0374944 |
| TRIM50    | 2247 chr7  | 72364580  | 72384927  | 0.0375014 | chr7:072364580  | 0.0375014 |
| GPR113    | 2248 chr2  | 26393050  | 26399762  | 0.0375045 | chr2:026393050  | 0.0375045 |
| ENPP4     | 2250 chr6  | 46202007  | 46206836  | 0.0375259 | chr6:046202007  | 0.0375259 |
| ACTN4     | 2255 chr19 | 43824667  | 43832648  | 0.037547  | chr19:043824667 | 0.037547  |

|          |            |           |           |           |             |           |
|----------|------------|-----------|-----------|-----------|-------------|-----------|
| C2orf43  | 2262 chr2  | 20885219  | 20891401  | 0.0375821 | chr2:020886 | 0.0375821 |
| PTPRN    | 2266 chr2  | 219865141 | 219883689 | 0.0376108 | chr2:219887 | 0.0376108 |
| TNNC1    | 2267 chr3  | 52460138  | 52463030  | 0.037613  | chr3:052467 | 0.037613  |
| RECQL4   | 2269 chr8  | 145707474 | 145713848 | 0.0376207 | chr8:145711 | 0.0376207 |
| STOML2   | 2273 chr9  | 35089897  | 35093746  | 0.0376321 | chr9:035097 | 0.0376321 |
| CDK5R2   | 2275 chr2  | 219527554 | 219535227 | 0.0376384 | chr2:219535 | 0.0376384 |
| NEUROG3  | 2276 chr10 | 71000791  | 71008630  | 0.0376444 | chr10:07100 | 0.0376444 |
| MAL2     | 2278 chr8  | 120285576 | 120292399 | 0.0376546 | chr8:120290 | 0.0376546 |
| DOCK5    | 2283 chr8  | 25092881  | 25100316  | 0.0376998 | chr8:025098 | 0.0376998 |
| PLXNB3   | 2289 chrX  | 152680653 | 152697902 | 0.0377201 | chrX:152691 | 0.0377201 |
| MPG      | 2294 chr16 | 67117     | 71554     | 0.0377529 | chr16:00000 | 0.0377529 |
| FBXW5    | 2296 chr9  | 138954102 | 138958842 | 0.0377591 | chr9:138954 | 0.0377591 |
| LCN2     | 2305 chr9  | 129946042 | 129954115 | 0.0377989 | chr9:129954 | 0.0377989 |
| METRNL   | 2310 chr16 | 705361    | 707482    | 0.0378111 | chr16:00070 | 0.0378111 |
| BTF3L4   | 2311 chr1  | 52294924  | 52299829  | 0.0378166 | chr1:052294 | 0.0378166 |
| RAVER1   | 2313 chr19 | 10287874  | 10305376  | 0.0378307 | chr19:01028 | 0.0378307 |
| ABCD1    | 2317 chrX  | 152643651 | 152648484 | 0.0378574 | chrX:152644 | 0.0378574 |
| IRF2BP2  | 2318 chr1  | 232809436 | 232817097 | 0.037875  | chr1:232810 | 0.037875  |
| C16orf55 | 2323 chr16 | 88251711  | 88255741  | 0.037892  | chr16:08825 | 0.037892  |
| H2AFY2   | 2327 chr10 | 71477530  | 71485067  | 0.037904  | chr10:07147 | 0.037904  |
| CEBPZ    | 2328 chr2  | 37307443  | 37312124  | 0.037914  | chr2:037312 | 0.037914  |
| ATP6V1A  | 2329 chr3  | 114948589 | 114953151 | 0.0379147 | chr3:114948 | 0.0379147 |
| ZNF579   | 2331 chr19 | 60781551  | 60789185  | 0.0379222 | chr19:06078 | 0.0379222 |
| EPHB4    | 2332 chr7  | 100260122 | 100267319 | 0.0379272 | chr7:100260 | 0.0379272 |
| ARSI     | 2334 chr5  | 149659742 | 149667507 | 0.0379541 | chr5:149667 | 0.0379541 |
| ITPR2    | 2337 chr12 | 26874465  | 26882751  | 0.037962  | chr12:02687 | 0.037962  |
| PSCA     | 2338 chr8  | 143758496 | 143761284 | 0.0379761 | chr8:143760 | 0.0379761 |
| PCDHA12  | 2339 chr5  | 140231457 | 140237579 | 0.037979  | chr5:140236 | 0.037979  |
| PHF17    | 2340 chr4  | 129945189 | 129952891 | 0.0379817 | chr4:129952 | 0.0379817 |
| ZBTB48   | 2342 chr1  | 6562434   | 6565393   | 0.0379831 | chr1:006562 | 0.0379831 |
| PRR5     | 2344 chr22 | 43445886  | 43507907  | 0.0379853 | chr22:04344 | 0.0379853 |
| ITIH1    | 2347 chr3  | 52786702  | 52801103  | 0.0379989 | chr3:052786 | 0.0379989 |
| UACA     | 2348 chr15 | 68840725  | 68848366  | 0.0379995 | chr15:06884 | 0.0379995 |
| BHLHB4   | 2350 chr20 | 61106133  | 61112057  | 0.0380047 | chr20:06110 | 0.0380047 |
| MSC      | 2351 chr8  | 72916695  | 72924774  | 0.0380059 | chr8:072916 | 0.0380059 |
| HS3ST2   | 2353 chr16 | 22727686  | 22735909  | 0.03801   | chr16:02272 | 0.03801   |
| PKIG     | 2355 chr20 | 42671267  | 42679051  | 0.0380124 | chr20:04267 | 0.0380124 |
| COL7A1   | 2356 chr3  | 48576541  | 48611396  | 0.038018  | chr3:048580 | 0.038018  |
| MED12    | 2359 chrX  | 70255159  | 70278990  | 0.0380339 | chrX:070255 | 0.0380339 |
| PHF15    | 2361 chr5  | 133883927 | 133892225 | 0.0380492 | chr5:133888 | 0.0380492 |
| OAF      | 2362 chr11 | 119582375 | 119589624 | 0.038052  | chr11:11958 | 0.038052  |
| C6orf81  | 2363 chr6  | 35803041  | 35814552  | 0.0380578 | chr6:035812 | 0.0380578 |
| C11orf2  | 2364 chr11 | 64612521  | 64635765  | 0.0380597 | chr11:06463 | 0.0380597 |
| SF3A3    | 2365 chr1  | 38225807  | 38234668  | 0.038061  | chr1:038222 | 0.038061  |
| PLEKHH2  | 2366 chr2  | 43712502  | 43719853  | 0.0380799 | chr2:043711 | 0.0380799 |
| FNIP1    | 2367 chr5  | 131158725 | 131164339 | 0.0380825 | chr5:131160 | 0.0380825 |
| FGF13    | 2373 chrX  | 137575133 | 137654472 | 0.0380949 | chrX:137627 | 0.0380949 |
| BGN      | 2379 chrX  | 152408134 | 152425794 | 0.0381212 | chrX:152421 | 0.0381212 |
| FCN3     | 2381 chr1  | 27568170  | 27578190  | 0.0381293 | chr1:027575 | 0.0381293 |
| SLC7A11  | 2384 chr4  | 139380366 | 139385732 | 0.0381432 | chr4:139382 | 0.0381432 |
| CLN6     | 2385 chr15 | 66286356  | 66314124  | 0.0381463 | chr15:06628 | 0.0381463 |
| LETM2    | 2387 chr8  | 38363203  | 38364683  | 0.0381518 | chr8:038363 | 0.0381518 |
| CREB3    | 2390 chr9  | 35722365  | 35727678  | 0.0381637 | chr9:035722 | 0.0381637 |
| GPR6     | 2394 chr6  | 110401589 | 110408667 | 0.0382105 | chr6:110407 | 0.0382105 |
| HS6ST2   | 2395 chrX  | 131916467 | 131924484 | 0.0382142 | chrX:131921 | 0.0382142 |
| AIRE     | 2398 chr21 | 44525221  | 44542220  | 0.038223  | chr21:04452 | 0.038223  |
| ENO2     | 2400 chr12 | 6893847   | 6903119   | 0.0382341 | chr12:00689 | 0.0382341 |
| DMWD     | 2403 chr19 | 50978126  | 50990735  | 0.0382384 | chr19:05097 | 0.0382384 |

|           |      |       |           |           |           |             |           |
|-----------|------|-------|-----------|-----------|-----------|-------------|-----------|
| DNAJB9    | 2409 | chr7  | 107997624 | 108002919 | 0.0382526 | chr7:107997 | 0.0382526 |
| DNMT3A    | 2411 | chr2  | 25415742  | 25424139  | 0.0382706 | chr2:025416 | 0.0382706 |
| TRIM9     | 2416 | chr14 | 50629101  | 50637974  | 0.0383039 | chr14:05063 | 0.0383039 |
| GYPC      | 2418 | chr2  | 127126583 | 127132823 | 0.0383085 | chr2:127132 | 0.0383085 |
| IFT74     | 2426 | chr9  | 26946425  | 26948903  | 0.0383803 | chr9:026946 | 0.0383803 |
| KIAA1914  | 2427 | chr10 | 116151882 | 116160006 | 0.0383817 | chr10:11615 | 0.0383817 |
| PIK3R4    | 2429 | chr3  | 131946060 | 131952948 | 0.0383882 | chr3:131946 | 0.0383882 |
| CRAT      | 2432 | chr9  | 130907722 | 130912739 | 0.03841   | chr9:130910 | 0.03841   |
| TMEM16A   | 2433 | chr11 | 69596843  | 69611660  | 0.0384122 | chr11:06960 | 0.0384122 |
| GPD1      | 2434 | chr12 | 48780931  | 48791372  | 0.0384125 | chr12:04878 | 0.0384125 |
| HSD17B14  | 2436 | chr19 | 54008214  | 54031646  | 0.0384316 | chr19:05403 | 0.0384316 |
| IRS4      | 2440 | chrX  | 107863724 | 107871805 | 0.0384548 | chrX:107863 | 0.0384548 |
| USP2      | 2443 | chr11 | 118737646 | 118758217 | 0.0384723 | chr11:11875 | 0.0384723 |
| PAQR3     | 2444 | chr4  | 80077016  | 80084946  | 0.03848   | chr4:080079 | 0.03848   |
| C14orf172 | 2445 | chr14 | 103065252 | 103067659 | 0.0384867 | chr14:10306 | 0.0384867 |
| ARV1      | 2449 | chr1  | 229181427 | 229186323 | 0.0385081 | chr1:229181 | 0.0385081 |
| C6orf153  | 2451 | chr6  | 43097008  | 43097807  | 0.0385149 | chr6:043097 | 0.0385149 |
| STMN3     | 2456 | chr20 | 61753291  | 61755134  | 0.0385352 | chr20:06175 | 0.0385352 |
| SERPINB1  | 2461 | chr6  | 2784731   | 2792497   | 0.0385653 | chr6:002784 | 0.0385653 |
| HEATR5B   | 2462 | chr2  | 37159687  | 37164844  | 0.0385757 | chr2:037164 | 0.0385757 |
| SERF2     | 2463 | chr15 | 41866805  | 41873988  | 0.0385942 | chr15:04186 | 0.0385942 |
| IL7       | 2464 | chr8  | 79877758  | 79885841  | 0.0385952 | chr8:079879 | 0.0385952 |
| AP3D1     | 2468 | chr19 | 2051461   | 2103088   | 0.0386437 | chr19:00210 | 0.0386437 |
| RARA      | 2471 | chr17 | 35713551  | 35754671  | 0.0386512 | chr17:03571 | 0.0386512 |
| DNAJB8    | 2473 | chr3  | 129663166 | 129674130 | 0.0386576 | chr3:129663 | 0.0386576 |
| SAR1B     | 2476 | chr5  | 133994943 | 134000978 | 0.0386675 | chr5:133996 | 0.0386675 |
| AYTL2     | 2482 | chr5  | 1574570   | 1581847   | 0.0387007 | chr5:001574 | 0.0387007 |
| GGN       | 2485 | chr19 | 43567274  | 43570490  | 0.0387058 | chr19:04356 | 0.0387058 |
| CHX10     | 2491 | chr14 | 73770626  | 73778193  | 0.0387153 | chr14:07377 | 0.0387153 |
| PRRG1     | 2498 | chrX  | 37088828  | 37096063  | 0.0387466 | chrX:037096 | 0.0387466 |
| C19orf28  | 2500 | chr19 | 3505935   | 3513483   | 0.0387582 | chr19:00350 | 0.0387582 |
| WNT16     | 2502 | chr7  | 120749429 | 120759063 | 0.0387735 | chr7:120759 | 0.0387735 |
| AP2A1     | 2503 | chr19 | 54962230  | 54963685  | 0.0387748 | chr19:05496 | 0.0387748 |
| LOC63928  | 2504 | chr16 | 23670830  | 23676389  | 0.0387776 | chr16:02367 | 0.0387776 |
| POGK      | 2506 | chr1  | 165071900 | 165077721 | 0.0387923 | chr1:165076 | 0.0387923 |
| LOC619208 | 2512 | chr6  | 112515450 | 112518269 | 0.0388213 | chr6:112515 | 0.0388213 |
| ALPI      | 2514 | chr2  | 233024633 | 233031342 | 0.0388249 | chr2:233029 | 0.0388249 |
| DCTN4     | 2519 | chr5  | 150116354 | 150123708 | 0.0388431 | chr5:150116 | 0.0388431 |
| ARNT      | 2527 | chr1  | 149048794 | 149121306 | 0.0388581 | chr1:149115 | 0.0388581 |
| TRRAP     | 2528 | chr7  | 98314063  | 98316508  | 0.0388686 | chr7:098314 | 0.0388686 |
| STAC2     | 2531 | chr17 | 34632896  | 34641007  | 0.0388877 | chr17:03463 | 0.0388877 |
| TNS3      | 2532 | chr7  | 47415431  | 47551151  | 0.03889   | chr7:047420 | 0.03889   |
| CCBL1     | 2534 | chr9  | 130635191 | 130684170 | 0.0389041 | chr9:130684 | 0.0389041 |
| DSP       | 2535 | chr6  | 7481462   | 7531881   | 0.0389065 | chr6:007481 | 0.0389065 |
| FAM44A    | 2536 | chr4  | 13235977  | 13243808  | 0.0389141 | chr4:013235 | 0.0389141 |
| TANK      | 2538 | chr2  | 161696901 | 161745361 | 0.0389183 | chr2:161725 | 0.0389183 |
| FLJ38377  | 2542 | chr2  | 131224178 | 131231886 | 0.0389304 | chr2:131230 | 0.0389304 |
| ADAMTS1   | 2546 | chr21 | 27137151  | 27145011  | 0.0389561 | chr21:02713 | 0.0389561 |
| SERPINF1  | 2548 | chr17 | 1607659   | 1614632   | 0.03897   | chr17:00160 | 0.03897   |
| MID1IP1   | 2550 | chrX  | 38540245  | 38550517  | 0.0390031 | chrX:038540 | 0.0390031 |
| PTK2B     | 2551 | chr8  | 27225013  | 27241380  | 0.0390099 | chr8:027223 | 0.0390099 |
| CACNA1A   | 2556 | chr19 | 13475559  | 13483528  | 0.0390352 | chr19:01347 | 0.0390352 |
| PIP5K1C   | 2559 | chr19 | 3648942   | 3656654   | 0.0390529 | chr19:00364 | 0.0390529 |
| TOPBP1    | 2565 | chr3  | 134862227 | 134867647 | 0.039091  | chr3:134863 | 0.039091  |
| CTBP2     | 2566 | chr10 | 126703791 | 126845069 | 0.0390969 | chr10:12670 | 0.0390969 |
| POLRMT    | 2567 | chr19 | 583284    | 584355    | 0.0391006 | chr19:00058 | 0.0391006 |
| FSTL1     | 2572 | chr3  | 121594993 | 121655657 | 0.0391231 | chr3:121655 | 0.0391231 |
| PSAT1     | 2580 | chr9  | 80096428  | 80104166  | 0.0391456 | chr9:080102 | 0.0391456 |



|           |            |           |           |           |                           |           |
|-----------|------------|-----------|-----------|-----------|---------------------------|-----------|
| VEPH1     | 2582 chr3  | 158697671 | 158709545 | 0.0391556 | chr3:158697671-158709545  | 0.0391556 |
| TESC      | 2585 chr12 | 116019186 | 116027038 | 0.0391679 | chr12:116019186-116027038 | 0.0391679 |
| ZNF414    | 2591 chr19 | 8482579   | 8489848   | 0.0392108 | chr19:008482579-8489848   | 0.0392108 |
| C15orf23  | 2595 chr15 | 38459171  | 38464919  | 0.0392555 | chr15:038459171-38464919  | 0.0392555 |
| CCNB2     | 2597 chr15 | 57179572  | 57187215  | 0.0392754 | chr15:057179572-57187215  | 0.0392754 |
| SBNO2     | 2598 chr19 | 1122748   | 1130189   | 0.0392793 | chr19:001122748-1130189   | 0.0392793 |
| OSR1      | 2599 chr2  | 19419500  | 19427300  | 0.0392844 | chr2:019419500-19427300   | 0.0392844 |
| POLR3B    | 2602 chr12 | 105270274 | 105277196 | 0.0392949 | chr12:105270274-105277196 | 0.0392949 |
| KIAA1522  | 2605 chr1  | 32998351  | 33006265  | 0.0393351 | chr1:032998351-33006265   | 0.0393351 |
| VBP1      | 2607 chrX  | 154092231 | 154100178 | 0.0393453 | chrX:154092231-154100178  | 0.0393453 |
| KCND1     | 2610 chrX  | 48703572  | 48715080  | 0.0393854 | chrX:048703572-48715080   | 0.0393854 |
| LYPD3     | 2613 chr19 | 48659123  | 48666537  | 0.039387  | chr19:048659123-48666537  | 0.039387  |
| GTF2H4    | 2616 chr6  | 30982265  | 30989858  | 0.0393926 | chr6:030982265-30989858   | 0.0393926 |
| C20orf112 | 2618 chr20 | 30523882  | 30538118  | 0.0394114 | chr20:030523882-30538118  | 0.0394114 |
| HK2       | 2621 chr2  | 74907896  | 74917681  | 0.0394367 | chr2:074907896-74917681   | 0.0394367 |
| MANEA     | 2622 chr6  | 96126730  | 96134609  | 0.0394369 | chr6:096126730-96134609   | 0.0394369 |
| KIAA1539  | 2629 chr9  | 35094318  | 35111304  | 0.0395047 | chr9:035094318-35111304   | 0.0395047 |
| SASP      | 2634 chr2  | 70039594  | 70048394  | 0.039523  | chr2:070039594-70048394   | 0.039523  |
| GCN5L2    | 2635 chr17 | 37518634  | 37526620  | 0.0395231 | chr17:037518634-37526620  | 0.0395231 |
| PRKCA     | 2637 chr17 | 61723895  | 61731848  | 0.039537  | chr17:061723895-61731848  | 0.039537  |
| CCT5      | 2638 chr5  | 10303288  | 10308004  | 0.0395394 | chr5:010303288-10308004   | 0.0395394 |
| TRIM15    | 2639 chr6  | 30233971  | 30240300  | 0.0395429 | chr6:030233971-30240300   | 0.0395429 |
| TEF       | 2640 chr22 | 40102549  | 40110501  | 0.0395559 | chr22:040102549-40110501  | 0.0395559 |
| WDR19     | 2642 chr4  | 38856020  | 38862775  | 0.0395591 | chr4:038856020-38862775   | 0.0395591 |
| BMP2K     | 2649 chr4  | 79911083  | 79918939  | 0.0395861 | chr4:079911083-79918939   | 0.0395861 |
| CHRND     | 2655 chr2  | 233093725 | 233108437 | 0.039631  | chr2:233093725-233108437  | 0.039631  |
| ETV2      | 2657 chr19 | 40820560  | 40827626  | 0.0396388 | chr19:040820560-40827626  | 0.0396388 |
| WDR75     | 2661 chr2  | 190010047 | 190016635 | 0.0396523 | chr2:190010047-190016635  | 0.0396523 |
| FAM98A    | 2664 chr2  | 33675523  | 33683220  | 0.0396743 | chr2:033675523-33683220   | 0.0396743 |
| GPR88     | 2668 chr1  | 100772656 | 100779531 | 0.0396849 | chr1:100772656-100779531  | 0.0396849 |
| ADAM8     | 2670 chr10 | 134938157 | 134945720 | 0.0397021 | chr10:134938157-134945720 | 0.0397021 |
| LZTS2     | 2676 chr10 | 102744371 | 102755613 | 0.0397208 | chr10:102744371-102755613 | 0.0397208 |
| C2orf53   | 2682 chr2  | 27213461  | 27215751  | 0.0397522 | chr2:027213461-27215751   | 0.0397522 |
| ILK       | 2690 chr11 | 6581656   | 6588562   | 0.039776  | chr11:006581656-6588562   | 0.039776  |
| PLSCR1    | 2691 chr3  | 147743095 | 147750632 | 0.0397796 | chr3:147743095-147750632  | 0.0397796 |
| CDC25B    | 2696 chr20 | 3724542   | 3727865   | 0.0398205 | chr20:003724542-3727865   | 0.0398205 |
| TTC35     | 2701 chr8  | 109519751 | 109527071 | 0.0398318 | chr8:109519751-109527071  | 0.0398318 |
| LOC284361 | 2702 chr19 | 55665249  | 55671805  | 0.0398322 | chr19:055665249-55671805  | 0.0398322 |
| USP47     | 2704 chr11 | 11817534  | 11822400  | 0.0398337 | chr11:011817534-11822400  | 0.0398337 |
| CCDC33    | 2713 chr15 | 72392499  | 72400425  | 0.0398769 | chr15:072392499-72400425  | 0.0398769 |
| AIFM3     | 2716 chr22 | 19644558  | 19665662  | 0.0398937 | chr22:019644558-19665662  | 0.0398937 |
| TRADD     | 2722 chr16 | 65745841  | 65751304  | 0.0399406 | chr16:065745841-65751304  | 0.0399406 |
| GLMN      | 2726 chr1  | 92533124  | 92537090  | 0.0399465 | chr1:092533124-92537090   | 0.0399465 |
| BTBD8     | 2727 chr1  | 92314892  | 92320989  | 0.0399516 | chr1:092314892-92320989   | 0.0399516 |
| MAGED1    | 2728 chrX  | 51649631  | 51656558  | 0.0399575 | chrX:051649631-51656558   | 0.0399575 |
| CSTF2     | 2733 chrX  | 99957438  | 99964582  | 0.0399761 | chrX:099957438-99964582   | 0.0399761 |
| AMBP      | 2737 chr9  | 115878804 | 115886048 | 0.0399907 | chr9:115878804-115886048  | 0.0399907 |
| MN1       | 2739 chr22 | 26524061  | 26532878  | 0.0399984 | chr22:026524061-26532878  | 0.0399984 |
| PROP1     | 2749 chr5  | 177353113 | 177358300 | 0.040058  | chr5:177353113-177358300  | 0.040058  |
| TEAD2     | 2751 chr19 | 54554387  | 54557524  | 0.0400703 | chr19:054554387-54557524  | 0.0400703 |
| KCNQ1DN   | 2753 chr11 | 2842471   | 2850059   | 0.0400704 | chr11:002842471-2850059   | 0.0400704 |
| SUMO3     | 2755 chr21 | 45049976  | 45065451  | 0.0400771 | chr21:045049976-45065451  | 0.0400771 |
| PAPSS1    | 2759 chr4  | 108858400 | 108862174 | 0.0401114 | chr4:108858400-108862174  | 0.0401114 |
| RAB9B     | 2761 chrX  | 102964938 | 102976764 | 0.0401169 | chrX:102964938-102976764  | 0.0401169 |
| KL        | 2763 chr13 | 32485468  | 32491048  | 0.0401191 | chr13:032485468-32491048  | 0.0401191 |
| EFCBP1    | 2766 chr8  | 91868268  | 91875806  | 0.0401252 | chr8:091868268-91875806   | 0.0401252 |
| HSPB9     | 2773 chr17 | 37528376  | 37528916  | 0.040157  | chr17:037528376-37528916  | 0.040157  |
| HRAS      | 2779 chr11 | 521990    | 525198    | 0.0401865 | chr11:000521990-525198    | 0.0401865 |

|           |            |           |           |           |             |           |
|-----------|------------|-----------|-----------|-----------|-------------|-----------|
| PRLHR     | 2784 chr10 | 120342455 | 120350300 | 0.0402083 | chr10:12034 | 0.0402083 |
| DDHD1     | 2785 chr14 | 52687275  | 52694728  | 0.0402085 | chr14:05268 | 0.0402085 |
| SLC25A25  | 2787 chr9  | 129870296 | 129903181 | 0.0402127 | chr9:12990  | 0.0402127 |
| PLXNA1    | 2788 chr3  | 128185229 | 128192601 | 0.0402148 | chr3:12819  | 0.0402148 |
| GTPBP4    | 2789 chr10 | 1018882   | 1054034   | 0.0402169 | chr10:0010  | 0.0402169 |
| TOM1      | 2790 chr22 | 34021985  | 34028143  | 0.0402257 | chr22:0340  | 0.0402257 |
| LATS2     | 2793 chr13 | 20531386  | 20538674  | 0.0402519 | chr13:0205  | 0.0402519 |
| CNN1      | 2797 chr19 | 11510636  | 11513014  | 0.040278  | chr19:0115  | 0.040278  |
| ACVR2B    | 2798 chr3  | 38466484  | 38509650  | 0.0402794 | chr3:03847  | 0.0402794 |
| SNX2      | 2800 chr5  | 122133247 | 122140694 | 0.0402896 | chr5:12213  | 0.0402896 |
| RAB11FIP3 | 2801 chr16 | 410855    | 512410    | 0.0402912 | chr16:0004  | 0.0402912 |
| APLN      | 2802 chrX  | 128614085 | 128622096 | 0.0402943 | chrX:12861  | 0.0402943 |
| SRCRB4D   | 2806 chr7  | 75864840  | 75881887  | 0.0403093 | chr7:07587  | 0.0403093 |
| HDGF      | 2811 chr1  | 154979484 | 154993569 | 0.040338  | chr1:15497  | 0.040338  |
| ST6GALNA  | 2814 chr1  | 77100767  | 77108182  | 0.0403562 | chr1:07710  | 0.0403562 |
| PSORS1C1  | 2815 chr6  | 31190615  | 31216756  | 0.0403581 | chr6:03119  | 0.0403581 |
| PARP3     | 2818 chr3  | 51951582  | 51956407  | 0.0403833 | chr3:05195  | 0.0403833 |
| DEPDC2    | 2820 chr8  | 69021590  | 69029627  | 0.0404005 | chr8:06902  | 0.0404005 |
| CLSTN2    | 2823 chr3  | 141132023 | 141138920 | 0.0404154 | chr3:14113  | 0.0404154 |
| FLJ22167  | 2829 chr16 | 74129982  | 74147722  | 0.0404342 | chr16:0741  | 0.0404342 |
| TLX1      | 2830 chr10 | 102875963 | 102883770 | 0.0404381 | chr10:1028  | 0.0404381 |
| MLLT11    | 2838 chr1  | 149298780 | 149307584 | 0.0404718 | chr1:14929  | 0.0404718 |
| PTPN6     | 2840 chr12 | 6925449   | 6940744   | 0.040474  | chr12:0069  | 0.040474  |
| C6orf64   | 2843 chr6  | 39188330  | 39195989  | 0.0405068 | chr6:03919  | 0.0405068 |
| RP1L1     | 2845 chr8  | 10547553  | 10555231  | 0.0405144 | chr8:01054  | 0.0405144 |
| C20orf58  | 2847 chr20 | 61353966  | 61361715  | 0.040525  | chr20:0613  | 0.040525  |
| SIVA1     | 2852 chr14 | 104285418 | 104293016 | 0.0405672 | chr14:1042  | 0.0405672 |
| GRIPAP1   | 2853 chrX  | 48715256  | 48744255  | 0.0405692 | chrX:04874  | 0.0405692 |
| SEC24C    | 2855 chr10 | 75170424  | 75201928  | 0.0405787 | chr10:0751  | 0.0405787 |
| ELOF1     | 2856 chr19 | 11523704  | 11531304  | 0.0405792 | chr19:0115  | 0.0405792 |
| GRM7      | 2869 chr3  | 6872719   | 6880482   | 0.0406394 | chr3:00687  | 0.0406394 |
| MGC33407  | 2870 chr19 | 8667547   | 8674909   | 0.0406409 | chr19:0086  | 0.0406409 |
| IRAK1     | 2874 chrX  | 152935936 | 152940363 | 0.0406799 | chrX:15293  | 0.0406799 |
| MGC10433  | 2875 chr19 | 40806751  | 40820442  | 0.0406845 | chr19:0408  | 0.0406845 |
| LOC153364 | 2881 chr5  | 89803442  | 89806272  | 0.0407208 | chr5:08980  | 0.0407208 |
| GPR50     | 2882 chrX  | 150090266 | 150098178 | 0.0407218 | chrX:15009  | 0.0407218 |
| USH1C     | 2888 chr11 | 17520483  | 17528033  | 0.0407667 | chr11:0175  | 0.0407667 |
| ZNF342    | 2889 chr19 | 50269569  | 50271410  | 0.0407678 | chr19:0502  | 0.0407678 |
| LOXL2     | 2890 chr8  | 23315139  | 23321490  | 0.0407685 | chr8:02331  | 0.0407685 |
| YRDC      | 2893 chr1  | 38041395  | 38046418  | 0.0407815 | chr1:03804  | 0.0407815 |
| CFTR      | 2894 chr7  | 116901724 | 116909825 | 0.0407919 | chr7:11690  | 0.0407919 |
| TMEM79    | 2898 chr1  | 154519390 | 154522968 | 0.0408067 | chr1:15452  | 0.0408067 |
| APBB3     | 2899 chr5  | 139918044 | 139924365 | 0.0408099 | chr5:13992  | 0.0408099 |
| KLF2      | 2901 chr19 | 16291279  | 16299176  | 0.040821  | chr19:0162  | 0.040821  |
| FRAS1     | 2902 chr4  | 79193519  | 79200653  | 0.0408398 | chr4:07919  | 0.0408398 |
| SPHK2     | 2903 chr19 | 53814478  | 53819755  | 0.0408474 | chr19:0538  | 0.0408474 |
| SSR4      | 2904 chrX  | 152713287 | 152718325 | 0.0408545 | chrX:15271  | 0.0408545 |
| GPR173    | 2906 chrX  | 53089781  | 53123892  | 0.0408558 | chrX:05312  | 0.0408558 |
| RIF1      | 2908 chr2  | 151969931 | 151977017 | 0.0408759 | chr2:15197  | 0.0408759 |
| NKPD1     | 2909 chr19 | 50346403  | 50354308  | 0.040876  | chr19:0503  | 0.040876  |
| TETRA     | 2910 chr4  | 2903164   | 2909393   | 0.0408799 | chr4:00290  | 0.0408799 |
| DNASE1L2  | 2913 chr16 | 2225899   | 2228908   | 0.0409024 | chr16:0022  | 0.0409024 |
| ZNF653    | 2920 chr19 | 11455246  | 11477817  | 0.0409402 | chr19:0114  | 0.0409402 |
| SCD5      | 2926 chr4  | 83936609  | 83941782  | 0.0409593 | chr4:08393  | 0.0409593 |
| NR0B1     | 2927 chrX  | 30235048  | 30242485  | 0.0409629 | chrX:03023  | 0.0409629 |
| FAM108A1  | 2928 chr19 | 1831252   | 1839480   | 0.0409731 | chr19:0018  | 0.0409731 |
| CD81      | 2934 chr11 | 2352266   | 2375203   | 0.0410085 | chr11:0023  | 0.0410085 |
| RASL10B   | 2935 chr17 | 31077518  | 31084898  | 0.0410147 | chr17:0310  | 0.0410147 |

|          |            |           |           |           |             |           |
|----------|------------|-----------|-----------|-----------|-------------|-----------|
| C8orf13  | 2938 chr8  | 11359186  | 11366364  | 0.041023  | chr8:011359 | 0.041023  |
| TRAF2    | 2948 chr9  | 138895927 | 138915466 | 0.0410618 | chr9:138915 | 0.0410618 |
| ZNF184   | 2951 chr6  | 27545802  | 27554366  | 0.0410673 | chr6:027545 | 0.0410673 |
| IFIH1    | 2957 chr2  | 162880579 | 162886911 | 0.0410868 | chr2:162880 | 0.0410868 |
| PSD2     | 2962 chr5  | 139151953 | 139158092 | 0.0410978 | chr5:139151 | 0.0410978 |
| TNFAIP2  | 2963 chr14 | 102657331 | 102665000 | 0.0410984 | chr14:10265 | 0.0410984 |
| MFHAS1   | 2964 chr8  | 8785697   | 8793312   | 0.041111  | chr8:008785 | 0.041111  |
| PHLDA3   | 2967 chr1  | 199702145 | 199708998 | 0.0411178 | chr1:199702 | 0.0411178 |
| MAGEA5   | 2971 chrX  | 151034811 | 151041923 | 0.0411349 | chrX:151034 | 0.0411349 |
| USP20    | 2977 chr9  | 131637613 | 131642561 | 0.0411781 | chr9:131637 | 0.0411781 |
| TMED9    | 2978 chr5  | 176947336 | 176955710 | 0.0411791 | chr5:176947 | 0.0411791 |
| PARD3B   | 2980 chr2  | 205113434 | 205121302 | 0.0411841 | chr2:205113 | 0.0411841 |
| CCDC96   | 2982 chr4  | 7093740   | 7101016   | 0.0411849 | chr4:007093 | 0.0411849 |
| CAT      | 2983 chr11 | 34411883  | 34419263  | 0.0412016 | chr11:03441 | 0.0412016 |
| PAQR7    | 2989 chr1  | 26060545  | 26075485  | 0.041233  | chr1:026060 | 0.041233  |
| HS3ST3B1 | 2995 chr17 | 14140099  | 14147999  | 0.0412538 | chr17:01414 | 0.0412538 |
| KPNB1    | 2996 chr17 | 43077010  | 43085044  | 0.0412636 | chr17:04307 | 0.0412636 |
| PSMB4    | 2997 chr1  | 149635231 | 149641094 | 0.0412711 | chr1:149635 | 0.0412711 |
| SEZ6L    | 3001 chr22 | 24890090  | 24898070  | 0.0412911 | chr22:02489 | 0.0412911 |
| FADS6    | 3002 chr17 | 70385419  | 70406277  | 0.0412969 | chr17:07040 | 0.0412969 |
| B3GALT4  | 3003 chr6  | 33352245  | 33354709  | 0.0413003 | chr6:033352 | 0.0413003 |
| INSIG2   | 3004 chr2  | 118557041 | 118564766 | 0.0413005 | chr2:118557 | 0.0413005 |
| PPWD1    | 3007 chr5  | 64894955  | 64899602  | 0.0413121 | chr5:064894 | 0.0413121 |
| EPHA5    | 3008 chr4  | 66215657  | 66223488  | 0.0413174 | chr4:066215 | 0.0413174 |
| SCARA5   | 3012 chr8  | 27899309  | 27911619  | 0.0413612 | chr8:027900 | 0.0413612 |
| ARSK     | 3015 chr5  | 94916612  | 94919208  | 0.0413699 | chr5:094916 | 0.0413699 |
| BAX      | 3018 chr19 | 54146275  | 54156888  | 0.0413763 | chr19:05414 | 0.0413763 |
| SOX13    | 3021 chr1  | 202303388 | 202311220 | 0.041382  | chr1:202310 | 0.041382  |
| ZMYND10  | 3031 chr3  | 50353536  | 50358464  | 0.0414419 | chr3:050353 | 0.0414419 |
| TTC29    | 3032 chr4  | 148084039 | 148091241 | 0.041445  | chr4:148084 | 0.041445  |
| ARHGAP30 | 3035 chr1  | 159283451 | 159308115 | 0.0414634 | chr1:159308 | 0.0414634 |
| CCNC     | 3049 chr6  | 100120798 | 100128442 | 0.0415199 | chr6:100120 | 0.0415199 |
| EGR2     | 3050 chr10 | 64243403  | 64251556  | 0.0415212 | chr10:06424 | 0.0415212 |
| P2RX3    | 3055 chr11 | 56862673  | 56865375  | 0.0415461 | chr11:05686 | 0.0415461 |
| CD248    | 3059 chr11 | 65838772  | 65842778  | 0.0415906 | chr11:06583 | 0.0415906 |
| LTB4R2   | 3061 chr14 | 23844228  | 23850320  | 0.0415947 | chr14:02384 | 0.0415947 |
| FBXO4    | 3067 chr5  | 41957527  | 41963560  | 0.0416116 | chr5:04196  | 0.0416116 |
| SP4      | 3070 chr7  | 21428732  | 21436916  | 0.0416222 | chr7:02143  | 0.0416222 |
| HCRTR1   | 3071 chr1  | 31851803  | 31859890  | 0.0416305 | chr1:03185  | 0.0416305 |
| FUBP1    | 3072 chr1  | 78215066  | 78222811  | 0.0416476 | chr1:07821  | 0.0416476 |
| NDUFV1   | 3073 chr11 | 67130990  | 67136191  | 0.041656  | chr11:06713 | 0.041656  |
| CHST13   | 3084 chr3  | 127725999 | 127728285 | 0.041698  | chr3:127727 | 0.041698  |
| COX7A1   | 3087 chr19 | 41333401  | 41337211  | 0.0417127 | chr19:04133 | 0.0417127 |
| DVL3     | 3088 chr3  | 185350954 | 185372927 | 0.0417152 | chr3:185350 | 0.0417152 |
| APLP1    | 3089 chr19 | 41049866  | 41053784  | 0.041718  | chr19:0410  | 0.041718  |
| SH3GLB2  | 3090 chr9  | 130827787 | 130830217 | 0.0417258 | chr9:13082  | 0.0417258 |
| PRDX1    | 3091 chr1  | 45757755  | 45764901  | 0.041736  | chr1:04575  | 0.041736  |
| LPPR2    | 3093 chr19 | 11327141  | 11329412  | 0.0417379 | chr19:01132 | 0.0417379 |
| IRX3     | 3099 chr16 | 52875157  | 52883323  | 0.0417562 | chr16:05287 | 0.0417562 |
| HS6ST3   | 3101 chr13 | 95536028  | 95543612  | 0.0417661 | chr13:0955  | 0.0417661 |
| GIT1     | 3103 chr17 | 24938054  | 24940523  | 0.041773  | chr17:0249  | 0.041773  |
| ARMCX3   | 3107 chrX  | 100764793 | 100767402 | 0.0418059 | chrX:10076  | 0.0418059 |
| UNG      | 3114 chr12 | 108019856 | 108022943 | 0.0418606 | chr12:1080  | 0.0418606 |
| LTC4S    | 3117 chr5  | 179148080 | 179155941 | 0.0418665 | chr5:17915  | 0.0418665 |
| CXorf34  | 3119 chrX  | 100191459 | 100199165 | 0.0418919 | chrX:10019  | 0.0418919 |
| NDUFC2   | 3135 chr11 | 77466680  | 77469145  | 0.0419796 | chr11:0774  | 0.0419796 |
| SYN1     | 3136 chrX  | 47361561  | 47368576  | 0.0419811 | chrX:04736  | 0.0419811 |
| OTUB2    | 3141 chr14 | 93557991  | 93564686  | 0.0419954 | chr14:0935  | 0.0419954 |

|           |            |           |           |           |             |           |
|-----------|------------|-----------|-----------|-----------|-------------|-----------|
| CD164L2   | 3152 chr1  | 27578354  | 27582293  | 0.0420647 | chr1:027579 | 0.0420647 |
| ZNF35     | 3153 chr3  | 44664952  | 44667426  | 0.0420683 | chr3:044666 | 0.0420683 |
| FLJ16008  | 3158 chr2  | 127677616 | 127680822 | 0.0420988 | chr2:127679 | 0.0420988 |
| OMA1      | 3161 chr1  | 58774916  | 58790383  | 0.0421053 | chr1:058784 | 0.0421053 |
| G6PC3     | 3162 chr17 | 39503768  | 39506343  | 0.0421163 | chr17:03950 | 0.0421163 |
| PPP1R12C  | 3164 chr19 | 60318050  | 60324243  | 0.0421268 | chr19:06030 | 0.0421268 |
| TAP1      | 3167 chr6  | 32921030  | 32929657  | 0.0421375 | chr6:032929 | 0.0421375 |
| PVRIG     | 3171 chr7  | 99650816  | 99657036  | 0.0421504 | chr7:099656 | 0.0421504 |
| PHF21B    | 3174 chr22 | 43781811  | 43789622  | 0.0421704 | chr22:04378 | 0.0421704 |
| ZCCHC3    | 3180 chr20 | 226185    | 228670    | 0.0421909 | chr20:00022 | 0.0421909 |
| URP2      | 3182 chr11 | 63728809  | 63747812  | 0.0421932 | chr11:06373 | 0.0421932 |
| GRRP1     | 3184 chr1  | 26353131  | 26360544  | 0.0422127 | chr1:026360 | 0.0422127 |
| GSG2      | 3185 chr17 | 3568458   | 3576414   | 0.0422199 | chr17:00357 | 0.0422199 |
| CEECAM1   | 3186 chr9  | 130221213 | 130225423 | 0.0422232 | chr9:130222 | 0.0422232 |
| ZNF276    | 3189 chr16 | 88315017  | 88318697  | 0.0422395 | chr16:08830 | 0.0422395 |
| C10orf137 | 3196 chr10 | 127392756 | 127400524 | 0.0423054 | chr10:12739 | 0.0423054 |
| RRAS      | 3201 chr19 | 54831763  | 54835004  | 0.0423289 | chr19:05483 | 0.0423289 |
| DUSP9     | 3203 chrX  | 152555695 | 152568963 | 0.0423423 | chrX:152566 | 0.0423423 |
| REST      | 3205 chr4  | 57463475  | 57471232  | 0.042355  | chr4:057470 | 0.042355  |
| LOC387856 | 3207 chr12 | 46858167  | 46866154  | 0.0423593 | chr12:04686 | 0.0423593 |
| HCN3      | 3209 chr1  | 153514143 | 153516316 | 0.0423622 | chr1:153514 | 0.0423622 |
| FHOD1     | 3213 chr16 | 65821001  | 65838901  | 0.0423724 | chr16:06582 | 0.0423724 |
| LOC284296 | 3216 chr19 | 60633565  | 60641573  | 0.0423837 | chr19:06063 | 0.0423837 |
| FERD3L    | 3220 chr7  | 19149344  | 19155791  | 0.0424064 | chr7:019150 | 0.0424064 |
| HEL308    | 3221 chr4  | 84590783  | 84595932  | 0.0424136 | chr4:084599 | 0.0424136 |
| MDH1B     | 3222 chr2  | 207334107 | 207338254 | 0.0424195 | chr2:207333 | 0.0424195 |
| LRRC8A    | 3226 chr9  | 130684369 | 130720081 | 0.0424528 | chr9:130718 | 0.0424528 |
| FLOT1     | 3228 chr6  | 30815927  | 30818841  | 0.042465  | chr6:030817 | 0.042465  |
| SCMH1     | 3229 chr1  | 41265692  | 41399749  | 0.0424671 | chr1:041266 | 0.0424671 |
| C9orf79   | 3230 chr9  | 89682170  | 89689957  | 0.0424709 | chr9:089689 | 0.0424709 |
| FAM65A    | 3233 chr16 | 66114978  | 66122607  | 0.0424821 | chr16:06611 | 0.0424821 |
| SRD5A2    | 3235 chr2  | 31657148  | 31661640  | 0.0424835 | chr2:031659 | 0.0424835 |
| WDFY2     | 3240 chr13 | 51053213  | 51059345  | 0.042515  | chr13:05105 | 0.042515  |
| PLEKHG6   | 3241 chr12 | 6284705   | 6292321   | 0.0425212 | chr12:00629 | 0.0425212 |
| CUL7      | 3242 chr6  | 43127185  | 43129696  | 0.0425217 | chr6:043128 | 0.0425217 |
| MAPK3     | 3243 chr16 | 30032905  | 30047092  | 0.042531  | chr16:03003 | 0.042531  |
| AARSD1    | 3244 chr17 | 38382449  | 38385554  | 0.0425359 | chr17:03838 | 0.0425359 |
| ATP2B4    | 3247 chr1  | 201857011 | 201921366 | 0.0425389 | chr1:201862 | 0.0425389 |
| SMTN      | 3250 chr22 | 29805170  | 29815053  | 0.042543  | chr22:02980 | 0.042543  |
| SMOX      | 3253 chr20 | 4075554   | 4102824   | 0.0425625 | chr20:00410 | 0.0425625 |
| C9orf142  | 3257 chr9  | 139001532 | 139008383 | 0.0425755 | chr9:139007 | 0.0425755 |
| MUS81     | 3258 chr11 | 65384557  | 65387844  | 0.0425907 | chr11:06538 | 0.0425907 |
| TBX21     | 3264 chr17 | 43160178  | 43168235  | 0.0426197 | chr17:04316 | 0.0426197 |
| PHLDB3    | 3273 chr19 | 48697595  | 48701294  | 0.0426547 | chr19:04870 | 0.0426547 |
| PTP4A1    | 3274 chr6  | 64336681  | 64342880  | 0.0426554 | chr6:064340 | 0.0426554 |
| TSTA3     | 3277 chr8  | 144765937 | 144771639 | 0.0426578 | chr8:144767 | 0.0426578 |
| NDUFB11   | 3282 chrX  | 46884164  | 46889401  | 0.042712  | chrX:046889 | 0.042712  |
| CYP20A1   | 3284 chr2  | 203806228 | 203813307 | 0.0427212 | chr2:203811 | 0.0427212 |
| MGC2752   | 3285 chr19 | 63778822  | 63781983  | 0.0427258 | chr19:06377 | 0.0427258 |
| KCNA1     | 3290 chr12 | 4886076   | 4893192   | 0.0427666 | chr12:00488 | 0.0427666 |
| TCEA3     | 3293 chr1  | 23621482  | 23629328  | 0.0427823 | chr1:023622 | 0.0427823 |
| PROCA1    | 3294 chr17 | 24061186  | 24065416  | 0.0427867 | chr17:02406 | 0.0427867 |
| ADM       | 3295 chr11 | 10282307  | 10286169  | 0.0427953 | chr11:01028 | 0.0427953 |
| SURF5     | 3303 chr9  | 135197580 | 135204485 | 0.0428362 | chr9:135197 | 0.0428362 |
| RIBC2     | 3305 chr22 | 44188229  | 44193216  | 0.0428365 | chr22:04418 | 0.0428365 |
| ZIC3      | 3308 chrX  | 136470489 | 136479034 | 0.042841  | chrX:136470 | 0.042841  |
| KREMEN2   | 3326 chr16 | 2949358   | 2958383   | 0.0429283 | chr16:00294 | 0.0429283 |
| ACN9      | 3328 chr7  | 96580072  | 96586631  | 0.0429367 | chr7:096584 | 0.0429367 |

|           |            |           |           |           |                           |           |
|-----------|------------|-----------|-----------|-----------|---------------------------|-----------|
| DLX2      | 3329 chr2  | 172673176 | 172681169 | 0.0429374 | chr2:172673176-172681169  | 0.0429374 |
| CARD10    | 3330 chr22 | 36216341  | 36250515  | 0.0429433 | chr22:36216341-36250515   | 0.0429433 |
| SPON1     | 3334 chr11 | 13935342  | 13942972  | 0.0429549 | chr11:13935342-13942972   | 0.0429549 |
| PTPRB     | 3336 chr12 | 69287418  | 69295342  | 0.0429612 | chr12:69287418-69295342   | 0.0429612 |
| UPK1B     | 3338 chr3  | 120372211 | 120390711 | 0.0429755 | chr3:120372211-120390711  | 0.0429755 |
| ACTN3     | 3341 chr11 | 66070955  | 66075639  | 0.0429889 | chr11:66070955-66075639   | 0.0429889 |
| GNL3L     | 3352 chrX  | 54570373  | 54575761  | 0.0430718 | chrX:54570373-54575761    | 0.0430718 |
| PPP1R1B   | 3358 chr17 | 35031316  | 35046184  | 0.0431065 | chr17:35031316-35046184   | 0.0431065 |
| C2        | 3359 chr6  | 31998012  | 32021428  | 0.0431068 | chr6:31998012-32021428    | 0.0431068 |
| FCMD      | 3361 chr9  | 107354931 | 107362211 | 0.0431191 | chr9:107354931-107362211  | 0.0431191 |
| CD300C    | 3363 chr17 | 70051108  | 70059308  | 0.0431355 | chr17:70051108-70059308   | 0.0431355 |
| GSC       | 3367 chr14 | 94303729  | 94311646  | 0.0431552 | chr14:94303729-94311646   | 0.0431552 |
| GGCX      | 3369 chr2  | 85639687  | 85643381  | 0.0431567 | chr2:85639687-85643381    | 0.0431567 |
| SLC25A11  | 3370 chr17 | 4780220   | 4784050   | 0.0431572 | chr17:4780220-4784050     | 0.0431572 |
| FES       | 3371 chr15 | 89227772  | 89231729  | 0.0431597 | chr15:89227772-89231729   | 0.0431597 |
| ACTL7B    | 3376 chr9  | 110656297 | 110657914 | 0.0431863 | chr9:110656297-110657914  | 0.0431863 |
| FZD1      | 3379 chr7  | 90726192  | 90734634  | 0.0432015 | chr7:90726192-90734634    | 0.0432015 |
| LY6E      | 3381 chr8  | 144166141 | 144173816 | 0.0432225 | chr8:144166141-144173816  | 0.0432225 |
| LOC338328 | 3383 chr8  | 144361008 | 144368897 | 0.0432349 | chr8:144361008-144368897  | 0.0432349 |
| SOX3      | 3388 chrX  | 139412492 | 139420461 | 0.0432597 | chrX:139412492-139420461  | 0.0432597 |
| PACSN3    | 3390 chr11 | 47155730  | 47167463  | 0.0432652 | chr11:47155730-47167463   | 0.0432652 |
| PJA2      | 3395 chr5  | 108771288 | 108774994 | 0.0433077 | chr5:108771288-108774994  | 0.0433077 |
| PNPLA2    | 3397 chr11 | 803447    | 814926    | 0.0433167 | chr11:803447-814926       | 0.0433167 |
| NKX2-2    | 3400 chr20 | 21439947  | 21448143  | 0.0433368 | chr20:21439947-21448143   | 0.0433368 |
| EPS8L1    | 3403 chr19 | 60275210  | 60286135  | 0.0433453 | chr19:60275210-60286135   | 0.0433453 |
| ATAD2     | 3404 chr8  | 124476273 | 124483228 | 0.0433479 | chr8:124476273-124483228  | 0.0433479 |
| C12orf34  | 3411 chr12 | 108651602 | 108666963 | 0.0433732 | chr12:108651602-108666963 | 0.0433732 |
| FGF18     | 3416 chr5  | 170775024 | 170782303 | 0.0433817 | chr5:170775024-170782303  | 0.0433817 |
| SLC4A2    | 3417 chr7  | 150388026 | 150392892 | 0.0433851 | chr7:150388026-150392892  | 0.0433851 |
| INPP5D    | 3426 chr2  | 233627895 | 233736812 | 0.0434264 | chr2:233627895-233736812  | 0.0434264 |
| EFCAB4A   | 3428 chr11 | 815227    | 821973    | 0.0434318 | chr11:815227-821973       | 0.0434318 |
| DLX1      | 3446 chr2  | 172653920 | 172661227 | 0.0435058 | chr2:172653920-172661227  | 0.0435058 |
| ZFYVE26   | 3451 chr14 | 67349984  | 67353063  | 0.0435305 | chr14:67349984-67353063   | 0.0435305 |
| RPUSD1    | 3452 chr16 | 775023    | 778378    | 0.0435313 | chr16:775023-778378       | 0.0435313 |
| GPR101    | 3455 chrX  | 135938997 | 135947021 | 0.0435696 | chrX:135938997-135947021  | 0.0435696 |
| APPBP2    | 3457 chr17 | 55956223  | 55960924  | 0.0435834 | chr17:55956223-55960924   | 0.0435834 |
| TSPAN7    | 3458 chrX  | 38300535  | 38307978  | 0.0435872 | chrX:38300535-38307978    | 0.0435872 |
| CABLES2   | 3460 chr20 | 60397052  | 60418565  | 0.0435954 | chr20:60397052-60418565   | 0.0435954 |
| SEPT3     | 3468 chr22 | 40697485  | 40724167  | 0.0436612 | chr22:40697485-40724167   | 0.0436612 |
| PCDH17    | 3473 chr13 | 57098780  | 57107111  | 0.043671  | chr13:57098780-57107111   | 0.043671  |
| USP46     | 3476 chr4  | 53218209  | 53222549  | 0.0436937 | chr4:53218209-53222549    | 0.0436937 |
| ALDOA     | 3477 chr16 | 29968219  | 29986571  | 0.0436959 | chr16:29968219-29986571   | 0.0436959 |
| LRR1Q2    | 3480 chr3  | 102921858 | 102928508 | 0.0437004 | chr3:102921858-102928508  | 0.0437004 |
| PMPCA     | 3481 chr9  | 138425057 | 138429885 | 0.0437009 | chr9:138425057-138429885  | 0.0437009 |
| UPF1      | 3482 chr19 | 18799619  | 18806398  | 0.0437151 | chr19:18799619-18806398   | 0.0437151 |
| RIN1      | 3483 chr11 | 65858046  | 65861291  | 0.0437156 | chr11:65858046-65861291   | 0.0437156 |
| THAP11    | 3487 chr16 | 66433992  | 66435553  | 0.0437294 | chr16:66433992-66435553   | 0.0437294 |
| GPI       | 3489 chr19 | 39542280  | 39583015  | 0.0437335 | chr19:39542280-39583015   | 0.0437335 |
| SYMPK     | 3514 chr19 | 51010517  | 51058211  | 0.0438624 | chr19:51010517-51058211   | 0.0438624 |
| PRPF38B   | 3517 chr1  | 109030962 | 109039191 | 0.043868  | chr1:109030962-109039191  | 0.043868  |
| LRRC45    | 3520 chr17 | 77574556  | 77582263  | 0.0438808 | chr17:77574556-77582263   | 0.0438808 |
| MGC33302  | 3525 chr4  | 129105909 | 129111971 | 0.0439239 | chr4:129105909-129111971  | 0.0439239 |
| PIK3R2    | 3530 chr19 | 18119524  | 18141600  | 0.043964  | chr19:18119524-18141600   | 0.043964  |
| ACTC1     | 3531 chr15 | 32872072  | 32880487  | 0.0439671 | chr15:32872072-32880487   | 0.0439671 |
| C20orf117 | 3533 chr20 | 34854482  | 34927899  | 0.0439759 | chr20:34854482-34927899   | 0.0439759 |
| FAM122A   | 3536 chr9  | 70580855  | 70587325  | 0.0439873 | chr9:70580855-70587325    | 0.0439873 |
| ARL9      | 3542 chr4  | 57064774  | 57068095  | 0.0440093 | chr4:57064774-57068095    | 0.0440093 |
| WDR44     | 3544 chrX  | 117358587 | 117367001 | 0.0440223 | chrX:117358587-117367001  | 0.0440223 |

|          |            |           |           |           |             |           |
|----------|------------|-----------|-----------|-----------|-------------|-----------|
| AANAT    | 3546 chr17 | 71970905  | 71977775  | 0.0440338 | chr17:07197 | 0.0440338 |
| CD164    | 3554 chr6  | 109807871 | 109815857 | 0.0440848 | chr6:109810 | 0.0440848 |
| OSBP2    | 3556 chr22 | 29417488  | 29423181  | 0.0441037 | chr22:02942 | 0.0441037 |
| SCN4A    | 3560 chr17 | 59402130  | 59406297  | 0.0441243 | chr17:05940 | 0.0441243 |
| C5orf33  | 3561 chr5  | 36275222  | 36283408  | 0.0441263 | chr5:036275 | 0.0441263 |
| STK10    | 3566 chr5  | 171545383 | 171549272 | 0.0441379 | chr5:171545 | 0.0441379 |
| PBX2     | 3570 chr6  | 32261265  | 32266350  | 0.0441479 | chr6:032264 | 0.0441479 |
| EDG5     | 3577 chr19 | 10194107  | 10208306  | 0.0441819 | chr19:01019 | 0.0441819 |
| HAS3     | 3578 chr16 | 67692297  | 67701284  | 0.0441979 | chr16:06769 | 0.0441979 |
| NCOA5    | 3590 chr20 | 44149901  | 44156156  | 0.0442977 | chr20:04414 | 0.0442977 |
| STS-1    | 3600 chr11 | 122027638 | 122033819 | 0.0443358 | chr11:12202 | 0.0443358 |
| CCDC131  | 3601 chr12 | 70338753  | 70343888  | 0.0443477 | chr12:07034 | 0.0443477 |
| PDZD4    | 3602 chrX  | 152746540 | 152754349 | 0.0443503 | chrX:15274  | 0.0443503 |
| IL20     | 3604 chr1  | 205100038 | 205107757 | 0.0443619 | chr1:205100 | 0.0443619 |
| PRMT1    | 3608 chr19 | 54869138  | 54883507  | 0.0443811 | chr19:05487 | 0.0443811 |
| NPLOC4   | 3615 chr17 | 77212816  | 77214251  | 0.0444041 | chr17:07721 | 0.0444041 |
| PALM     | 3616 chr19 | 658897    | 699273    | 0.0444052 | chr19:00069 | 0.0444052 |
| MTF1     | 3624 chr1  | 38047831  | 38103067  | 0.04443   | chr1:038097 | 0.04443   |
| FAM78B   | 3627 chr1  | 164399719 | 164408034 | 0.0444469 | chr1:16440  | 0.0444469 |
| ELF4     | 3636 chrX  | 129040770 | 129077714 | 0.04449   | chrX:12907  | 0.04449   |
| WNT9B    | 3641 chr17 | 42278484  | 42286526  | 0.0444984 | chr17:04228 | 0.0444984 |
| TMEM30B  | 3644 chr14 | 60815349  | 60822819  | 0.0445111 | chr14:0608  | 0.0445111 |
| DOK4     | 3659 chr16 | 56068463  | 56079291  | 0.0445865 | chr16:05606 | 0.0445865 |
| PTPLAD1  | 3661 chr15 | 63607919  | 63612343  | 0.0446062 | chr15:06360 | 0.0446062 |
| ADCK5    | 3663 chr8  | 145566526 | 145571000 | 0.0446187 | chr8:145566 | 0.0446187 |
| PAFAH1B2 | 3667 chr11 | 116514762 | 116530294 | 0.044653  | chr11:11652 | 0.044653  |
| EGR4     | 3670 chr2  | 73371450  | 73379052  | 0.0446562 | chr2:07337  | 0.0446562 |
| OGFOD2   | 3672 chr12 | 122025282 | 122025535 | 0.0446657 | chr12:12202 | 0.0446657 |
| DMPK     | 3675 chr19 | 50964878  | 50978054  | 0.0446756 | chr19:05097 | 0.0446756 |
| SLC25A4  | 3676 chr4  | 186295964 | 186303878 | 0.0446902 | chr4:186303 | 0.0446902 |
| TAL1     | 3681 chr1  | 47465527  | 47473471  | 0.0447088 | chr1:04746  | 0.0447088 |
| TMEM123  | 3684 chr11 | 101826452 | 101834283 | 0.0447314 | chr11:10182 | 0.0447314 |
| PAFAH2   | 3704 chr1  | 26194652  | 26201806  | 0.0448114 | chr1:02619  | 0.0448114 |
| EGFL7    | 3708 chr9  | 138671712 | 138687187 | 0.044826  | chr9:13868  | 0.044826  |
| ARHGEF17 | 3713 chr11 | 72691799  | 72699744  | 0.0448454 | chr11:07269 | 0.0448454 |
| PDCL     | 3722 chr9  | 124628529 | 124636136 | 0.0448845 | chr9:12463  | 0.0448845 |
| SRPRB    | 3724 chr3  | 135001887 | 135009608 | 0.0449065 | chr3:13500  | 0.0449065 |
| NR4A1    | 3730 chr12 | 50719389  | 50733857  | 0.0449579 | chr12:05071 | 0.0449579 |
| FLJ40172 | 3732 chr2  | 47233504  | 47240742  | 0.0449664 | chr2:04723  | 0.0449664 |
| C19orf36 | 3734 chr19 | 2048014   | 2051309   | 0.0449732 | chr19:00204 | 0.0449732 |
| CBFA2T3  | 3755 chr16 | 87532609  | 87576499  | 0.0450973 | chr16:08755 | 0.0450973 |
| NT5C     | 3756 chr17 | 70638035  | 70643273  | 0.0451319 | chr17:07063 | 0.0451319 |
| OSBPL8   | 3758 chr12 | 75270110  | 75481730  | 0.0451482 | chr12:07547 | 0.0451482 |
| C5AR1    | 3762 chr19 | 52500333  | 52507095  | 0.04516   | chr19:05250 | 0.04516   |
| IKBKAP   | 3768 chr9  | 110730856 | 110736226 | 0.045199  | chr9:11073  | 0.045199  |
| LRRC62   | 3771 chr22 | 36099070  | 36106869  | 0.0452043 | chr22:03609 | 0.0452043 |
| MAPK8IP2 | 3774 chr22 | 49382084  | 49390817  | 0.0452092 | chr22:04938 | 0.0452092 |
| PKIB     | 3775 chr6  | 122834810 | 123083002 | 0.0452123 | chr6:12297  | 0.0452123 |
| BOP1     | 3780 chr8  | 145480789 | 145485931 | 0.0452393 | chr8:14548  | 0.0452393 |
| SLC4A3   | 3781 chr2  | 220195054 | 220203335 | 0.0452433 | chr2:22020  | 0.0452433 |
| SLC35F3  | 3784 chr1  | 232106428 | 232419042 | 0.0452536 | chr1:23241  | 0.0452536 |
| ZNF396   | 3797 chr18 | 31205876  | 31216720  | 0.045328  | chr18:0312  | 0.045328  |
| RASSF1   | 3802 chr3  | 50342198  | 50353404  | 0.045347  | chr3:05034  | 0.045347  |
| COX5A    | 3805 chr15 | 73016345  | 73022669  | 0.0453628 | chr15:0730  | 0.0453628 |
| RASD1    | 3808 chr17 | 17337933  | 17345592  | 0.0453768 | chr17:01733 | 0.0453768 |
| ITM2A    | 3811 chrX  | 78506848  | 78514925  | 0.0453929 | chrX:07850  | 0.0453929 |
| SMARCA2  | 3816 chr9  | 2001109   | 2007822   | 0.0454196 | chr9:00200  | 0.0454196 |
| ZNF800   | 3825 chr7  | 126817524 | 126823397 | 0.0454845 | chr7:12681  | 0.0454845 |

|           |            |           |           |           |             |           |
|-----------|------------|-----------|-----------|-----------|-------------|-----------|
| NCAPG     | 3826 chr4  | 17421660  | 17426660  | 0.0454847 | chr4:01742  | 0.0454847 |
| HTF9C     | 3836 chr22 | 18479650  | 18484658  | 0.0455251 | chr22:01848 | 0.0455251 |
| SDC4      | 3839 chr20 | 43408044  | 43412063  | 0.0455613 | chr20:04340 | 0.0455613 |
| COL20A1   | 3841 chr20 | 61391741  | 61397505  | 0.0455731 | chr20:06139 | 0.0455731 |
| MAPBPIP   | 3847 chr1  | 154291265 | 154294830 | 0.0456088 | chr1:15429  | 0.0456088 |
| GBGT1     | 3857 chr9  | 135026759 | 135033505 | 0.0456569 | chr9:13502  | 0.0456569 |
| C15orf39  | 3859 chr15 | 73276730  | 73290520  | 0.0456711 | chr15:07328 | 0.0456711 |
| ERCC2     | 3863 chr19 | 50563705  | 50565940  | 0.0456822 | chr19:05056 | 0.0456822 |
| LAMA4     | 3865 chr6  | 112679622 | 112687624 | 0.0456878 | chr6:11268  | 0.0456878 |
| KCNE1L    | 3872 chrX  | 108752457 | 108760415 | 0.045717  | chrX:10875  | 0.045717  |
| C20orf100 | 3873 chr20 | 41973141  | 42037400  | 0.0457298 | chr20:04203 | 0.0457298 |
| SEMA3G    | 3874 chr3  | 52451603  | 52459936  | 0.0457422 | chr3:05245  | 0.0457422 |
| CXorf40A  | 3877 chrX  | 148428970 | 148431630 | 0.045756  | chrX:14843  | 0.045756  |
| METT11D1  | 3882 chr14 | 20522447  | 20534923  | 0.0457688 | chr14:02052 | 0.0457688 |
| IPO4      | 3886 chr14 | 23725643  | 23728166  | 0.045784  | chr14:02372 | 0.045784  |
| TM2D2     | 3887 chr8  | 38969251  | 38973119  | 0.0457915 | chr8:03897  | 0.0457915 |
| FLJ21687  | 3889 chrX  | 48903558  | 48911060  | 0.0458001 | chrX:04891  | 0.0458001 |
| LDOC1L    | 3890 chr22 | 43270363  | 43277527  | 0.0458237 | chr22:04327 | 0.0458237 |
| ZBED5     | 3891 chr11 | 10833809  | 10841293  | 0.0458238 | chr11:01083 | 0.0458238 |
| JRK       | 3893 chr8  | 143742636 | 143748838 | 0.0458416 | chr8:14374  | 0.0458416 |
| SORT1     | 3894 chr1  | 109653762 | 109746021 | 0.0458424 | chr1:10974  | 0.0458424 |
| APOE      | 3897 chr19 | 50098800  | 50104502  | 0.0458555 | chr19:05010 | 0.0458555 |
| TIMP2     | 3901 chr17 | 74430803  | 74438320  | 0.0458778 | chr17:07443 | 0.0458778 |
| AIM1      | 3913 chr6  | 107061575 | 107069436 | 0.0459398 | chr6:10706  | 0.0459398 |
| FGD1      | 3914 chrX  | 54536071  | 54543320  | 0.0459421 | chrX:05453  | 0.0459421 |
| CENTB1    | 3915 chr17 | 7180576   | 7195539   | 0.045944  | chr17:00719 | 0.045944  |
| SYP       | 3922 chrX  | 48931344  | 48948485  | 0.046016  | chrX:04893  | 0.046016  |
| PRAME     | 3924 chr22 | 21229221  | 21237247  | 0.0460204 | chr22:02122 | 0.0460204 |
| WDR13     | 3925 chrX  | 48335734  | 48343850  | 0.0460232 | chrX:04834  | 0.0460232 |
| PRKCG     | 3934 chr19 | 59072276  | 59102525  | 0.0460442 | chr19:05907 | 0.0460442 |
| SEC14L3   | 3935 chr22 | 29195482  | 29203480  | 0.0460466 | chr22:02919 | 0.0460466 |
| BCL6B     | 3937 chr17 | 6867076   | 6869593   | 0.0460523 | chr17:00686 | 0.0460523 |
| SLC7A4    | 3941 chr22 | 19713809  | 19718296  | 0.0460742 | chr22:01971 | 0.0460742 |
| NXPH1     | 3944 chr7  | 8434812   | 8443195   | 0.0460839 | chr7:00844  | 0.0460839 |
| FLJ10241  | 3945 chr19 | 46629585  | 46642219  | 0.0460932 | chr19:04663 | 0.0460932 |
| DNASE2    | 3949 chr19 | 12851323  | 12856181  | 0.0461073 | chr19:01285 | 0.0461073 |
| FLAD1     | 3958 chr1  | 153218455 | 153232121 | 0.0461578 | chr1:15322  | 0.0461578 |
| PLA2G6    | 3960 chr22 | 36837438  | 36911782  | 0.0461807 | chr22:03683 | 0.0461807 |
| MPV17     | 3961 chr2  | 27385967  | 27402175  | 0.0461869 | chr2:02738  | 0.0461869 |
| AIP       | 3962 chr11 | 67006608  | 67008226  | 0.0462006 | chr11:06700 | 0.0462006 |
| NR2E3     | 3968 chr15 | 69884479  | 69892400  | 0.0462325 | chr15:06988 | 0.0462325 |
| NPEPL1    | 3969 chr20 | 56697279  | 56703297  | 0.0462375 | chr20:05670 | 0.0462375 |
| CD7       | 3970 chr17 | 77866184  | 77872130  | 0.0462568 | chr17:07786 | 0.0462568 |
| TDP1      | 3980 chr14 | 89492034  | 89496221  | 0.0463211 | chr14:08949 | 0.0463211 |
| C8orf47   | 3983 chr8  | 99141964  | 99148277  | 0.0463371 | chr8:09914  | 0.0463371 |
| POU3F1    | 3998 chr1  | 38282500  | 38290467  | 0.046441  | chr1:03828  | 0.046441  |
| C19orf42  | 3999 chr19 | 16623390  | 16631927  | 0.0464432 | chr19:01662 | 0.0464432 |
| HDAC3     | 4004 chr5  | 140980623 | 140996500 | 0.0464758 | chr5:14099  | 0.0464758 |
| SAFB2     | 4011 chr19 | 5568803   | 5573819   | 0.0465    | chr19:00557 | 0.0465    |
| EPHA8     | 4015 chr1  | 22758170  | 22765175  | 0.046527  | chr1:02276  | 0.046527  |
| GRM2      | 4017 chr3  | 51713356  | 51720481  | 0.0465318 | chr3:05172  | 0.0465318 |
| WEE1      | 4022 chr11 | 9545533   | 9554304   | 0.046545  | chr11:00955 | 0.046545  |
| SLC6A19   | 4026 chr5  | 1249407   | 1275023   | 0.0465623 | chr5:00125  | 0.0465623 |
| DKFZp434E | 4027 chr1  | 199443135 | 199451617 | 0.0465625 | chr1:19944  | 0.0465625 |
| ANKFY1    | 4030 chr17 | 4111657   | 4119439   | 0.046568  | chr17:00411 | 0.046568  |
| CD3EAP    | 4031 chr19 | 50601357  | 50604776  | 0.0465925 | chr19:05060 | 0.0465925 |
| PRM3      | 4040 chr16 | 11274811  | 11276987  | 0.0466367 | chr16:01127 | 0.0466367 |
| APRT      | 4041 chr16 | 87403384  | 87407458  | 0.0466412 | chr16:08740 | 0.0466412 |

|           |            |           |           |           |             |           |
|-----------|------------|-----------|-----------|-----------|-------------|-----------|
| IGSF8     | 4042 chr1  | 158327506 | 158340474 | 0.0466417 | chr1:158334 | 0.0466417 |
| PLA2G4B   | 4044 chr15 | 39907618  | 39909148  | 0.0466501 | chr15:03990 | 0.0466501 |
| BTG2      | 4050 chr1  | 201535975 | 201543812 | 0.0466742 | chr1:201542 | 0.0466742 |
| SNX22     | 4051 chr15 | 62225491  | 62233492  | 0.0466753 | chr15:06222 | 0.0466753 |
| STK16     | 4054 chr2  | 219818432 | 219822470 | 0.0467098 | chr2:219818 | 0.0467098 |
| NAGS      | 4059 chr17 | 39437737  | 39442697  | 0.0467394 | chr17:03943 | 0.0467394 |
| TSGA10IP  | 4061 chr11 | 65467277  | 65484032  | 0.0467552 | chr11:06546 | 0.0467552 |
| FOXN2     | 4064 chr2  | 48391972  | 48397723  | 0.0467679 | chr2:048396 | 0.0467679 |
| SPRY2     | 4068 chr13 | 79810471  | 79818330  | 0.0467802 | chr13:07981 | 0.0467802 |
| IGFBP4    | 4069 chr17 | 35849171  | 35855754  | 0.0467812 | chr17:03584 | 0.0467812 |
| BAD       | 4074 chr11 | 63807121  | 63808625  | 0.0467898 | chr11:06380 | 0.0467898 |
| PSMD7     | 4075 chr16 | 72882735  | 72890653  | 0.0467923 | chr16:07288 | 0.0467923 |
| CTDSP2    | 4084 chr12 | 56499970  | 56531883  | 0.0468363 | chr12:05652 | 0.0468363 |
| SLC25A5   | 4088 chrX  | 118483025 | 118488787 | 0.0468469 | chrX:118483 | 0.0468469 |
| ST3GAL2   | 4091 chr16 | 68987801  | 69036007  | 0.0468505 | chr16:06902 | 0.0468505 |
| AASDH     | 4095 chr4  | 56946150  | 56951631  | 0.0468667 | chr4:056946 | 0.0468667 |
| SPRY4     | 4098 chr5  | 141682269 | 141689857 | 0.0468855 | chr5:141682 | 0.0468855 |
| AMIGO3    | 4101 chr3  | 49730014  | 49733959  | 0.0468891 | chr3:049730 | 0.0468891 |
| VPS24     | 4107 chr2  | 86642404  | 86649094  | 0.046921  | chr2:086642 | 0.046921  |
| DKK2      | 4108 chr4  | 108173845 | 108182374 | 0.0469247 | chr4:108176 | 0.0469247 |
| ETV6      | 4114 chr12 | 11688534  | 11696775  | 0.0469505 | chr12:01168 | 0.0469505 |
| PLCB1     | 4126 chr20 | 8055996   | 8063755   | 0.0470344 | chr20:00806 | 0.0470344 |
| PIAS4     | 4127 chr19 | 3958112   | 3961279   | 0.0470401 | chr19:00396 | 0.0470401 |
| FSCN3     | 4134 chr7  | 127019125 | 127023466 | 0.0470677 | chr7:127021 | 0.0470677 |
| GGA1      | 4138 chr22 | 36329437  | 36337210  | 0.047076  | chr22:03632 | 0.047076  |
| PWP2      | 4139 chr21 | 44350897  | 44375445  | 0.0470766 | chr21:04435 | 0.0470766 |
| CAMLG     | 4141 chr5  | 134096700 | 134104664 | 0.0470892 | chr5:134102 | 0.0470892 |
| NHS       | 4142 chrX  | 17298164  | 17664013  | 0.0470916 | chrX:017301 | 0.0470916 |
| HIST1H2AK | 4146 chr6  | 27914013  | 27914057  | 0.0471094 | chr6:027914 | 0.0471094 |
| SFRS8     | 4147 chr12 | 130758351 | 130764225 | 0.0471106 | chr12:13076 | 0.0471106 |
| MCOLN1    | 4148 chr19 | 7492128   | 7504699   | 0.0471107 | chr19:00749 | 0.0471107 |
| SFXN4     | 4152 chr10 | 120912789 | 120917117 | 0.0471312 | chr10:12091 | 0.0471312 |
| LACE1     | 4153 chr6  | 108718086 | 108725368 | 0.0471358 | chr6:108722 | 0.0471358 |
| ALKBH1    | 4158 chr14 | 77240005  | 77244055  | 0.0471561 | chr14:07724 | 0.0471561 |
| EXTL1     | 4169 chr1  | 26215612  | 26224231  | 0.0472534 | chr1:026222 | 0.0472534 |
| BTBD14B   | 4176 chr19 | 13090350  | 13109414  | 0.0472806 | chr19:01310 | 0.0472806 |
| TBL3      | 4179 chr16 | 1959006   | 1968841   | 0.0472944 | chr16:00196 | 0.0472944 |
| C13orf26  | 4184 chr13 | 30400134  | 30406546  | 0.0473154 | chr13:03040 | 0.0473154 |
| SLC32A1   | 4185 chr20 | 36781070  | 36789284  | 0.0473173 | chr20:03678 | 0.0473173 |
| RCC2      | 4187 chr1  | 17635192  | 17644246  | 0.0473327 | chr1:017635 | 0.0473327 |
| MFGE8     | 4188 chr15 | 87243088  | 87263109  | 0.0473339 | chr15:08724 | 0.0473339 |
| PPRC1     | 4190 chr10 | 103878979 | 103900079 | 0.0473431 | chr10:10388 | 0.0473431 |
| RPS19     | 4197 chr19 | 47050330  | 47058845  | 0.0473781 | chr19:04705 | 0.0473781 |
| GRIN3A    | 4198 chr9  | 103537788 | 103546093 | 0.0473905 | chr9:103539 | 0.0473905 |
| GPR62     | 4204 chr3  | 51959025  | 51966341  | 0.0474318 | chr3:051962 | 0.0474318 |
| RDHE2     | 4208 chr8  | 57393419  | 57401248  | 0.047466  | chr8:057393 | 0.047466  |
| LBX1      | 4214 chr10 | 102976163 | 102984172 | 0.0474921 | chr10:10297 | 0.0474921 |
| NTN1      | 4231 chr17 | 8861707   | 8868877   | 0.047566  | chr17:00886 | 0.047566  |
| TFCP2L1   | 4233 chr2  | 121756809 | 121763732 | 0.0475905 | chr2:121756 | 0.0475905 |
| FOSB      | 4239 chr19 | 50657902  | 50666176  | 0.0476095 | chr19:05066 | 0.0476095 |
| HPN       | 4251 chr19 | 40223272  | 40225552  | 0.0476665 | chr19:04022 | 0.0476665 |
| TMEM22    | 4257 chr3  | 138016754 | 138022770 | 0.0476928 | chr3:138021 | 0.0476928 |
| MAP3K6    | 4259 chr1  | 27563190  | 27566738  | 0.0476977 | chr1:027563 | 0.0476977 |
| INVS      | 4260 chr9  | 101901309 | 101906634 | 0.0477    | chr9:101902 | 0.0477    |
| ZNF337    | 4263 chr20 | 25614039  | 25626215  | 0.0477203 | chr20:02561 | 0.0477203 |
| NAP1L2    | 4265 chrX  | 72348621  | 72355865  | 0.0477355 | chrX:072355 | 0.0477355 |
| LRRC40    | 4279 chr1  | 70438832  | 70443834  | 0.0478269 | chr1:070443 | 0.0478269 |
| ACCN1     | 4280 chr17 | 28640970  | 29512796  | 0.0478347 | chr17:02951 | 0.0478347 |



|            |            |           |           |           |            |           |
|------------|------------|-----------|-----------|-----------|------------|-----------|
| TRPV1      | 4286 chr17 | 3440520   | 3452599   | 0.0478574 | chr17:0034 | 0.0478574 |
| JMJD3      | 4287 chr17 | 7693641   | 7698686   | 0.0478678 | chr17:0076 | 0.0478678 |
| SLC25A43   | 4288 chrX  | 118411541 | 118419791 | 0.0478701 | chrX:11841 | 0.0478701 |
| FLJ44968   | 4289 chr19 | 19500076  | 19509281  | 0.047876  | chr19:0195 | 0.047876  |
| CD160      | 4294 chr1  | 144415741 | 144429086 | 0.0479016 | chr1:14442 | 0.0479016 |
| F2         | 4295 chr11 | 46692191  | 46699119  | 0.0479024 | chr11:0466 | 0.0479024 |
| LMX1B      | 4302 chr9  | 128411620 | 128419067 | 0.047941  | chr9:12841 | 0.047941  |
| PPARBP     | 4303 chr17 | 34816437  | 34861723  | 0.0479446 | chr17:0348 | 0.0479446 |
| ARHGAP6    | 4311 chrX  | 11192157  | 11598952  | 0.0479661 | chrX:01159 | 0.0479661 |
| PSMA1      | 4312 chr11 | 14483031  | 14621675  | 0.0479678 | chr11:0144 | 0.0479678 |
| GCK        | 4324 chr7  | 44150509  | 44196310  | 0.0480354 | chr7:04416 | 0.0480354 |
| FAM83B     | 4330 chr6  | 54814188  | 54821982  | 0.0480839 | chr6:05481 | 0.0480839 |
| LOH12CR1   | 4336 chr12 | 12401432  | 12403999  | 0.0481347 | chr12:0124 | 0.0481347 |
| GPATCH3    | 4338 chr1  | 27089570  | 27102506  | 0.0481384 | chr1:02709 | 0.0481384 |
| C1orf65    | 4339 chr1  | 221628312 | 221635422 | 0.0481397 | chr1:22163 | 0.0481397 |
| CX3CL1     | 4340 chr16 | 55958514  | 55966040  | 0.0481416 | chr16:0559 | 0.0481416 |
| TMEM102    | 4348 chr17 | 7271854   | 7281693   | 0.0481925 | chr17:0072 | 0.0481925 |
| OTEX       | 4352 chrX  | 119133198 | 119139307 | 0.0482001 | chrX:11913 | 0.0482001 |
| MMACHC     | 4353 chr1  | 45738634  | 45740052  | 0.0482021 | chr1:04573 | 0.0482021 |
| LILRB5     | 4354 chr19 | 59450518  | 59454621  | 0.0482032 | chr19:0594 | 0.0482032 |
| PARD6A     | 4357 chr16 | 66252473  | 66254203  | 0.0482114 | chr16:0662 | 0.0482114 |
| MRPS25     | 4372 chr3  | 15079807  | 15086522  | 0.0482822 | chr3:01508 | 0.0482822 |
| RASSF7     | 4373 chr11 | 551478    | 555967    | 0.0482871 | chr11:0005 | 0.0482871 |
| SNCG       | 4374 chr10 | 88708416  | 88712991  | 0.0483108 | chr10:0887 | 0.0483108 |
| PHF7       | 4377 chr3  | 52419757  | 52424127  | 0.0483468 | chr3:05241 | 0.0483468 |
| TTYH2      | 4381 chr17 | 69717995  | 69723577  | 0.0483603 | chr17:0697 | 0.0483603 |
| KCNQ1      | 4384 chr11 | 2418278   | 2441724   | 0.048372  | chr11:0024 | 0.048372  |
| C19orf46   | 4386 chr19 | 41189092  | 41191663  | 0.0483941 | chr19:0411 | 0.0483941 |
| MRPS12     | 4397 chr19 | 44108771  | 44117567  | 0.0484539 | chr19:0441 | 0.0484539 |
| PRSS8      | 4403 chr16 | 31051993  | 31057770  | 0.0484878 | chr16:0310 | 0.0484878 |
| LOC134145  | 4406 chr5  | 10298144  | 10303009  | 0.04849   | chr5:01030 | 0.04849   |
| hsa-mir-93 | 4407 chr7  | 99529350  | 99529395  | 0.0484944 | chr7:09952 | 0.0484944 |
| FAM19A2    | 4409 chr12 | 60869557  | 60878276  | 0.0485025 | chr12:0608 | 0.0485025 |
| ATP2B3     | 4424 chrX  | 152449379 | 152457372 | 0.0485919 | chrX:15245 | 0.0485919 |
| GJA4       | 4425 chr1  | 35026050  | 35033432  | 0.0486112 | chr1:03503 | 0.0486112 |
| SNX21      | 4427 chr20 | 43895973  | 43898183  | 0.0486287 | chr20:0438 | 0.0486287 |
| REV3L      | 4440 chr6  | 111909195 | 111916799 | 0.0487081 | chr6:11191 | 0.0487081 |
| GPR44      | 4446 chr11 | 60375370  | 60381541  | 0.0487322 | chr11:0603 | 0.0487322 |
| TRIM63     | 4448 chr1  | 26250422  | 26271403  | 0.0487368 | chr1:02626 | 0.0487368 |
| CBX8       | 4453 chr17 | 75382945  | 75390683  | 0.0487539 | chr17:0753 | 0.0487539 |
| C21orf51   | 4470 chr21 | 34665358  | 34672189  | 0.0488459 | chr21:0346 | 0.0488459 |
| ZNF263     | 4479 chr16 | 3268212   | 3276323   | 0.048881  | chr16:0032 | 0.048881  |
| CHIT1      | 4481 chr1  | 201462866 | 201469143 | 0.0488886 | chr1:20146 | 0.0488886 |
| ZNF143     | 4482 chr11 | 9436263   | 9440361   | 0.0488954 | chr11:0094 | 0.0488954 |
| E4F1       | 4483 chr16 | 2213562   | 2225749   | 0.0488984 | chr16:0022 | 0.0488984 |
| C10orf54   | 4486 chr10 | 73200726  | 73208138  | 0.0489081 | chr10:0732 | 0.0489081 |
| RAB36      | 4489 chr22 | 21817538  | 21837715  | 0.0489138 | chr22:0218 | 0.0489138 |
| PITPNC1    | 4490 chr17 | 62803285  | 62806611  | 0.0489139 | chr17:0628 | 0.0489139 |
| FAM96A     | 4492 chr15 | 62169776  | 62173251  | 0.0489349 | chr15:0621 | 0.0489349 |
| PCOTH      | 4494 chr13 | 23359219  | 23361496  | 0.0489461 | chr13:0233 | 0.0489461 |
| RAB27A     | 4495 chr15 | 53347370  | 53372650  | 0.0489557 | chr15:0533 | 0.0489557 |
| EIF3S12    | 4506 chr19 | 43801636  | 43803986  | 0.0490056 | chr19:0438 | 0.0490056 |
| LRRN5      | 4512 chr1  | 202918671 | 202926645 | 0.0490443 | chr1:20291 | 0.0490443 |
| DENND1C    | 4514 chr19 | 6430577   | 6434452   | 0.0490578 | chr19:0064 | 0.0490578 |
| LAMA5      | 4517 chr20 | 60373324  | 60381222  | 0.0491042 | chr20:0603 | 0.0491042 |
| NKX2-8     | 4518 chr14 | 36118951  | 36126938  | 0.0491043 | chr14:0361 | 0.0491043 |
| CLOCK      | 4520 chr4  | 56104367  | 56111169  | 0.0491124 | chr4:05610 | 0.0491124 |
| ZNF671     | 4543 chr19 | 62913246  | 62932198  | 0.0491968 | chr19:0629 | 0.0491968 |

|          |            |           |           |           |             |           |
|----------|------------|-----------|-----------|-----------|-------------|-----------|
| EFNA2    | 4547 chr19 | 1231644   | 1239661   | 0.0492112 | chr19:00121 | 0.0492112 |
| ST6GALNA | 4554 chr9  | 129716888 | 129722867 | 0.0492744 | chr9:129716 | 0.0492744 |
| F2RL1    | 4558 chr5  | 76145860  | 76153141  | 0.0492981 | chr5:076150 | 0.0492981 |
| MAP2K3   | 4566 chr17 | 21123467  | 21144813  | 0.0493351 | chr17:02114 | 0.0493351 |
| WNT5B    | 4567 chr12 | 1591088   | 1611110   | 0.0493353 | chr12:00160 | 0.0493353 |
| F12      | 4568 chr5  | 176761724 | 176774597 | 0.0493408 | chr5:176762 | 0.0493408 |
| DHX15    | 4569 chr4  | 24193001  | 24200376  | 0.0493417 | chr4:024195 | 0.0493417 |
| KCNJ12   | 4580 chr17 | 21214876  | 21261693  | 0.0493953 | chr17:02122 | 0.0493953 |
| HEXA     | 4581 chr15 | 70452947  | 70455261  | 0.0494212 | chr15:07045 | 0.0494212 |
| FXYD2    | 4584 chr11 | 117198245 | 117209396 | 0.0494383 | chr11:11719 | 0.0494383 |
| ARHGEF10 | 4588 chr8  | 1754821   | 1796749   | 0.0494532 | chr8:001795 | 0.0494532 |
| TMEM35   | 4594 chrX  | 100219412 | 100237962 | 0.0494874 | chrX:100221 | 0.0494874 |
| TMEM153  | 4598 chr22 | 49288063  | 49292916  | 0.0495157 | chr22:04929 | 0.0495157 |
| SLC39A13 | 4599 chr11 | 47381440  | 47390647  | 0.0495188 | chr11:04738 | 0.0495188 |
| MAGEA8   | 4600 chrX  | 148768376 | 148773162 | 0.0495281 | chrX:14877  | 0.0495281 |
| FLJ40125 | 4601 chr19 | 50693687  | 50697604  | 0.0495281 | chr19:05069 | 0.0495281 |
| RENBP    | 4602 chrX  | 152854059 | 152866211 | 0.0495383 | chrX:15286  | 0.0495383 |
| LRIG1    | 4603 chr3  | 66631073  | 66638960  | 0.0495442 | chr3:066630 | 0.0495442 |
| ACTL6B   | 4604 chr7  | 100078659 | 100095523 | 0.049545  | chr7:100079 | 0.049545  |
| MLLT6    | 4617 chr17 | 34110972  | 34127757  | 0.0496117 | chr17:03411 | 0.0496117 |
| SFN      | 4623 chr1  | 27056848  | 27064535  | 0.0496362 | chr1:027060 | 0.0496362 |
| THEM2    | 4629 chr6  | 24775250  | 24775977  | 0.0496521 | chr6:024775 | 0.0496521 |
| ZNF179   | 4630 chr17 | 19249789  | 19257700  | 0.0496574 | chr17:01925 | 0.0496574 |
| FADS1    | 4644 chr11 | 61338442  | 61342155  | 0.0497473 | chr11:06134 | 0.0497473 |
| C1orf86  | 4649 chr1  | 2113597   | 2120913   | 0.0497583 | chr1:002114 | 0.0497583 |
| ABCA7    | 4653 chr19 | 990193    | 1016573   | 0.0497943 | chr19:00099 | 0.0497943 |
| RABEP2   | 4656 chr16 | 28842523  | 28843868  | 0.0498003 | chr16:02884 | 0.0498003 |
| KCNA7    | 4658 chr19 | 54262884  | 54269202  | 0.0498055 | chr19:05426 | 0.0498055 |
| B4GALT5  | 4661 chr20 | 47761142  | 47768485  | 0.049829  | chr20:04776 | 0.049829  |
| PLEKHH3  | 4679 chr17 | 38079691  | 38084951  | 0.0499441 | chr17:03808 | 0.0499441 |
| EBP      | 4680 chrX  | 48264120  | 48267498  | 0.0499665 | chrX:04826  | 0.0499665 |

### HPSE- bound genes (5'-transcribe region)

### ST subset (523 genes)

| Gene      | Rank (Hep-1) | Chromosome | Start     | End       | Min P(Xbar) | Probe       | P(Xbar)   |
|-----------|--------------|------------|-----------|-----------|-------------|-------------|-----------|
| LRRTM1    | 232          | chr2       | 80382569  | 80390116  | 0.021949    | chr2:08038  | 0.021949  |
| TRIM36    | 238          | chr5       | 114541135 | 114546895 | 0.0220266   | chr5:114543 | 0.0220266 |
| FAM46B    | 375          | chr1       | 27209325  | 27217520  | 0.0238813   | chr1:027211 | 0.0238813 |
| EPHB1     | 400          | chr3       | 135991644 | 135999601 | 0.0241175   | chr3:135997 | 0.0241175 |
| SHC3      | 491          | chr9       | 90980874  | 90988635  | 0.0252491   | chr9:090983 | 0.0252491 |
| ASAH1     | 504          | chr4       | 77078818  | 77086156  | 0.0253931   | chr4:077080 | 0.0253931 |
| FAM83H    | 614          | chr8       | 144880245 | 144888311 | 0.0264755   | chr8:144884 | 0.0264755 |
| ROR2      | 663          | chr9       | 93749647  | 93757679  | 0.0269234   | chr9:093757 | 0.0269234 |
| BXDC2     | 680          | chr5       | 34951668  | 34953885  | 0.0270891   | chr5:034957 | 0.0270891 |
| LOC40012C | 704          | chr13      | 36140652  | 36148421  | 0.0273137   | chr13:03614 | 0.0273137 |
| SLC39A10  | 718          | chr2       | 196224788 | 196232532 | 0.0274089   | chr2:196230 | 0.0274089 |
| MDS1      | 783          | chr3       | 170861701 | 170869536 | 0.0280181   | chr3:170863 | 0.0280181 |
| TAPBP     | 789          | chr6       | 33375436  | 33389861  | 0.0281124   | chr6:033389 | 0.0281124 |
| ELOVL1    | 800          | chr1       | 43603838  | 43611809  | 0.0281593   | chr1:043604 | 0.0281593 |
| SNAG1     | 801          | chr5       | 53846310  | 53852014  | 0.0281637   | chr5:053857 | 0.0281637 |
| ALX3      | 809          | chr1       | 110412386 | 110419370 | 0.0282109   | chr1:110414 | 0.0282109 |
| CXCL14    | 854          | chr5       | 134940126 | 134947825 | 0.0285784   | chr5:134942 | 0.0285784 |
| ITGA6     | 887          | chr2       | 172995510 | 173002953 | 0.0288925   | chr2:173000 | 0.0288925 |
| ALPL      | 888          | chr1       | 21703172  | 21710923  | 0.0288936   | chr1:021709 | 0.0288936 |
| FLJ16124  | 910          | chr2       | 65517380  | 65519335  | 0.0290196   | chr2:065517 | 0.0290196 |
| NEUROG2   | 925          | chr4       | 113653796 | 113662198 | 0.0291033   | chr4:113656 | 0.0291033 |
| CEI       | 951          | chr5       | 2805337   | 2810273   | 0.029363    | chr5:002805 | 0.029363  |
| SFRP4     | 982          | chr7       | 37920191  | 37922886  | 0.0296663   | chr7:037922 | 0.0296663 |

|           |            |           |           |           |                 |           |
|-----------|------------|-----------|-----------|-----------|-----------------|-----------|
| NR2E1     | 1015 chr6  | 108588654 | 108597134 | 0.0298518 | chr6:108597134  | 0.0298518 |
| C1orf188  | 1028 chr1  | 6191529   | 6194612   | 0.0299748 | chr1:006191529  | 0.0299748 |
| SNX24     | 1041 chr5  | 122205841 | 122211447 | 0.0301252 | chr5:122205841  | 0.0301252 |
| LOC441108 | 1052 chr5  | 131769250 | 131777072 | 0.0302106 | chr5:131777072  | 0.0302106 |
| SNX13     | 1065 chr7  | 17944204  | 17950848  | 0.0302762 | chr7:017944204  | 0.0302762 |
| MAP9      | 1074 chr4  | 156515088 | 156521715 | 0.0303197 | chr4:156515088  | 0.0303197 |
| PHOX2B    | 1083 chr4  | 41443145  | 41451222  | 0.0303905 | chr4:041443145  | 0.0303905 |
| CCDC13    | 1108 chr3  | 42788796  | 42795199  | 0.0305708 | chr3:042788796  | 0.0305708 |
| TOX       | 1114 chr8  | 60191653  | 60199534  | 0.0306259 | chr8:060191653  | 0.0306259 |
| MON1A     | 1120 chr3  | 49921450  | 49942365  | 0.0306802 | chr3:049921450  | 0.0306802 |
| CDC14B    | 1133 chr9  | 98418988  | 98426656  | 0.0307582 | chr9:098418988  | 0.0307582 |
| KLF14     | 1140 chr7  | 130067142 | 130074866 | 0.0308372 | chr7:130067142  | 0.0308372 |
| AZIN1     | 1147 chr8  | 103943698 | 103951045 | 0.0308628 | chr8:103943698  | 0.0308628 |
| CAPN2     | 1156 chr1  | 221961730 | 221969016 | 0.0309067 | chr1:221961730  | 0.0309067 |
| LNPEP     | 1162 chr5  | 96293610  | 96300037  | 0.0309522 | chr5:096293610  | 0.0309522 |
| ZNF175    | 1172 chr19 | 56760888  | 56768804  | 0.0310293 | chr19:056760888 | 0.0310293 |
| ZNF16     | 1178 chr8  | 146144543 | 146147452 | 0.0310759 | chr8:146144543  | 0.0310759 |
| CAD       | 1186 chr2  | 27293596  | 27295646  | 0.0310981 | chr2:027293596  | 0.0310981 |
| RPS6KA2   | 1188 chr6  | 166957988 | 166965434 | 0.031121  | chr6:166957988  | 0.031121  |
| RPL22     | 1201 chr1  | 6167759   | 6182271   | 0.031188  | chr1:006167759  | 0.031188  |
| UBE2R2    | 1211 chr9  | 33804058  | 33810272  | 0.0312505 | chr9:033804058  | 0.0312505 |
| RPP14     | 1238 chr3  | 58263066  | 58268886  | 0.0313777 | chr3:058263066  | 0.0313777 |
| EHD3      | 1260 chr2  | 31305768  | 31313451  | 0.0315643 | chr2:031305768  | 0.0315643 |
| MAT2B     | 1263 chr5  | 162857599 | 162867417 | 0.0315718 | chr5:162857599  | 0.0315718 |
| GPR157    | 1280 chr1  | 9109228   | 9117463   | 0.0316631 | chr1:009109228  | 0.0316631 |
| DTNB      | 1299 chr2  | 25747846  | 25755087  | 0.0318152 | chr2:025747846  | 0.0318152 |
| THAP1     | 1316 chr8  | 42814869  | 42819716  | 0.0319373 | chr8:042814869  | 0.0319373 |
| NFE2L3    | 1326 chr7  | 26156183  | 26160646  | 0.0320323 | chr7:026156183  | 0.0320323 |
| SDK1      | 1335 chr7  | 3303060   | 3310184   | 0.0320594 | chr7:003303060  | 0.0320594 |
| FLJ30851  | 1356 chr2  | 24246095  | 24253493  | 0.0321821 | chr2:024246095  | 0.0321821 |
| KIF17     | 1373 chr1  | 20863325  | 20922058  | 0.0323322 | chr1:020863325  | 0.0323322 |
| SMO       | 1394 chr7  | 128612040 | 128618618 | 0.0324623 | chr7:128612040  | 0.0324623 |
| DST       | 1406 chr6  | 56613225  | 56821413  | 0.0325323 | chr6:056613225  | 0.0325323 |
| CLDN7     | 1412 chr17 | 7104168   | 7108275   | 0.0325547 | chr17:007104168 | 0.0325547 |
| ATP5I     | 1419 chr4  | 655430    | 658039    | 0.0325971 | chr4:000655430  | 0.0325971 |
| C10orf67  | 1420 chr10 | 23671674  | 23678691  | 0.0326026 | chr10:023671674 | 0.0326026 |
| SRP72     | 1428 chr4  | 57024048  | 57064183  | 0.032664  | chr4:057024048  | 0.032664  |
| C9orf86   | 1441 chr9  | 138822209 | 138824798 | 0.0327485 | chr9:138822209  | 0.0327485 |
| S100Z     | 1444 chr5  | 76177467  | 76184007  | 0.0327846 | chr5:076177467  | 0.0327846 |
| DOCK4     | 1447 chr7  | 111628448 | 111633719 | 0.0328365 | chr7:111633719  | 0.0328365 |
| EIF2C1    | 1450 chr1  | 36116657  | 36123824  | 0.0328461 | chr1:036116657  | 0.0328461 |
| FAM123A   | 1455 chr13 | 24641462  | 24649894  | 0.0328733 | chr13:024641462 | 0.0328733 |
| EVC       | 1461 chr4  | 5763852   | 5765461   | 0.0329512 | chr4:005763852  | 0.0329512 |
| DNAJB2    | 1477 chr2  | 219847033 | 219855288 | 0.0330745 | chr2:219847033  | 0.0330745 |
| HINT3     | 1493 chr6  | 126315510 | 126320839 | 0.0332018 | chr6:126315510  | 0.0332018 |
| CIAO1     | 1497 chr2  | 96295590  | 96300874  | 0.0332233 | chr2:096295590  | 0.0332233 |
| ABCC5     | 1506 chr3  | 185215949 | 185220813 | 0.0332735 | chr3:185215949  | 0.0332735 |
| KCNN2     | 1560 chr5  | 113720597 | 113799535 | 0.0336597 | chr5:113720597  | 0.0336597 |
| MTX2      | 1609 chr2  | 176837833 | 176844172 | 0.0339845 | chr2:176837833  | 0.0339845 |
| D4ST1     | 1612 chr15 | 38547780  | 38552984  | 0.0339991 | chr15:038547780 | 0.0339991 |
| C1orf128  | 1619 chr1  | 23975417  | 23987159  | 0.034019  | chr1:023975417  | 0.034019  |
| URM1      | 1629 chr9  | 130169818 | 130193777 | 0.0340462 | chr9:130169818  | 0.0340462 |
| AR        | 1636 chrX  | 66678205  | 66684194  | 0.0341003 | chrX:066678205  | 0.0341003 |
| C7orf46   | 1640 chr7  | 23683628  | 23688066  | 0.0341609 | chr7:023683628  | 0.0341609 |
| RAXL1     | 1641 chr19 | 3720389   | 3728669   | 0.0341634 | chr19:003720389 | 0.0341634 |
| C19orf15  | 1649 chr19 | 43513365  | 43553424  | 0.0342071 | chr19:043513365 | 0.0342071 |
| SLC6A15   | 1656 chr12 | 83828338  | 83834979  | 0.0342427 | chr12:083828338 | 0.0342427 |
| GCC2      | 1674 chr2  | 108427588 | 108434595 | 0.0343059 | chr2:108427588  | 0.0343059 |

|                 |            |           |           |           |                 |           |
|-----------------|------------|-----------|-----------|-----------|-----------------|-----------|
| GTDC1           | 1680 chr2  | 144804120 | 144811507 | 0.0343447 | chr2:144804120  | 0.0343447 |
| CCT4            | 1693 chr2  | 61967328  | 61974129  | 0.0344102 | chr2:061967328  | 0.0344102 |
| CENTB5          | 1704 chr1  | 1226824   | 1228503   | 0.0344928 | chr1:001226824  | 0.0344928 |
| PTPRT           | 1711 chr20 | 41249397  | 41257020  | 0.0345341 | chr20:041249397 | 0.0345341 |
| S100PBP         | 1715 chr1  | 33052949  | 33056053  | 0.0345456 | chr1:033052949  | 0.0345456 |
| FGFR3           | 1717 chr4  | 1760017   | 1767892   | 0.0345506 | chr4:001760017  | 0.0345506 |
| KPNA1           | 1723 chr3  | 123713882 | 123721542 | 0.0345612 | chr3:123713882  | 0.0345612 |
| TULP1           | 1739 chr6  | 35573749  | 35590147  | 0.0346663 | chr6:035573749  | 0.0346663 |
| GGPS1           | 1740 chr1  | 233558471 | 233563195 | 0.0346729 | chr1:233558471  | 0.0346729 |
| ID1             | 1745 chr20 | 29654081  | 29659368  | 0.0347073 | chr20:029654081 | 0.0347073 |
| NFKBIZ          | 1748 chr3  | 103047860 | 103053598 | 0.0347426 | chr3:103047860  | 0.0347426 |
| LOC113179       | 1754 chr19 | 1856466   | 1858900   | 0.0347745 | chr19:001856466 | 0.0347745 |
| FZD3            | 1772 chr8  | 28407755  | 28410094  | 0.03488   | chr8:028407755  | 0.03488   |
| RPL29           | 1776 chr3  | 52002106  | 52009933  | 0.0349205 | chr3:052002106  | 0.0349205 |
| LOC339344       | 1800 chr19 | 51085104  | 51101026  | 0.0350765 | chr19:051085104 | 0.0350765 |
| ATP6V1B2        | 1825 chr8  | 20095526  | 20101391  | 0.0351768 | chr8:020095526  | 0.0351768 |
| NOL8            | 1826 chr9  | 94127630  | 94132765  | 0.0351844 | chr9:094127630  | 0.0351844 |
| PIP5K3          | 1832 chr2  | 208838159 | 208841399 | 0.0352413 | chr2:208838159  | 0.0352413 |
| ESPL1           | 1833 chr12 | 51943413  | 51973712  | 0.0352425 | chr12:051943413 | 0.0352425 |
| DKFZP564C001001 | 1834 chr4  | 76073290  | 76079808  | 0.0352462 | chr4:076073290  | 0.0352462 |
| C1orf85         | 1884 chr1  | 154529559 | 154532626 | 0.0355135 | chr1:154529559  | 0.0355135 |
| TCEB3           | 1887 chr1  | 23937197  | 23944987  | 0.0355262 | chr1:023937197  | 0.0355262 |
| MED11           | 1889 chr17 | 4576070   | 4583524   | 0.0355286 | chr17:004576070 | 0.0355286 |
| MCMDC1          | 1892 chr6  | 119295655 | 119302139 | 0.0355454 | chr6:119295655  | 0.0355454 |
| ANXA3           | 1895 chr4  | 79689627  | 79696951  | 0.0355678 | chr4:079689627  | 0.0355678 |
| IDI1            | 1917 chr10 | 1083493   | 1085068   | 0.035678  | chr10:001083493 | 0.035678  |
| GLB1L           | 1920 chr2  | 219813005 | 219818218 | 0.0356814 | chr2:219813005  | 0.0356814 |
| SMG7            | 1922 chr1  | 181703207 | 181710460 | 0.0356958 | chr1:181703207  | 0.0356958 |
| RASIP1          | 1944 chr19 | 53915827  | 53935838  | 0.0358538 | chr19:053915827 | 0.0358538 |
| KCTD15          | 1953 chr19 | 38974217  | 38982069  | 0.035932  | chr19:038974217 | 0.035932  |
| ARC             | 1955 chr8  | 143690451 | 143698336 | 0.0359493 | chr8:143690451  | 0.0359493 |
| C1orf198        | 1959 chr1  | 229068380 | 229076882 | 0.0359678 | chr1:229068380  | 0.0359678 |
| PDCD2           | 1971 chr6  | 170733856 | 170738163 | 0.0360554 | chr6:170733856  | 0.0360554 |
| SLC25A37        | 1987 chr8  | 23436901  | 23444630  | 0.0361338 | chr8:023436901  | 0.0361338 |
| CAMK2N2         | 1995 chr3  | 185459741 | 185465847 | 0.0361663 | chr3:185459741  | 0.0361663 |
| WDR60           | 2010 chr7  | 158341323 | 158344029 | 0.0362723 | chr7:158341323  | 0.0362723 |
| VTN             | 2017 chr17 | 23718606  | 23721445  | 0.0363128 | chr17:023718606 | 0.0363128 |
| LSM6            | 2042 chr4  | 147311475 | 147318709 | 0.0364501 | chr4:147311475  | 0.0364501 |
| C14orf122       | 2052 chr14 | 23678119  | 23682322  | 0.0365009 | chr14:023678119 | 0.0365009 |
| FRMD3           | 2060 chr9  | 85340731  | 85346965  | 0.0365466 | chr9:085340731  | 0.0365466 |
| DNAJC11         | 2064 chr1  | 6682188   | 6689973   | 0.0365528 | chr1:006682188  | 0.0365528 |
| ZNHIT2          | 2078 chr11 | 64640464  | 64644502  | 0.0366494 | chr11:064640464 | 0.0366494 |
| PSPC1           | 2108 chr13 | 19253577  | 19255983  | 0.0367905 | chr13:019253577 | 0.0367905 |
| NDUFA6          | 2111 chr22 | 40814878  | 40818501  | 0.0368228 | chr22:040814878 | 0.0368228 |
| SLCO5A1         | 2125 chr8  | 70907445  | 70913930  | 0.0368741 | chr8:070907445  | 0.0368741 |
| SRRM2           | 2129 chr16 | 2737401   | 2745128   | 0.0368911 | chr16:002737401 | 0.0368911 |
| LHFPL3          | 2137 chr7  | 103750837 | 103758824 | 0.03696   | chr7:103750837  | 0.03696   |
| DENND1A         | 2140 chr9  | 125729943 | 125737263 | 0.0369749 | chr9:125729943  | 0.0369749 |
| C5orf32         | 2152 chr5  | 139530637 | 139537372 | 0.0370458 | chr5:139530637  | 0.0370458 |
| BMI1            | 2154 chr10 | 22649271  | 22652618  | 0.0370477 | chr10:022649271 | 0.0370477 |
| WNT1            | 2158 chr12 | 47658646  | 47661221  | 0.0370621 | chr12:047658646 | 0.0370621 |
| RP2             | 2165 chrX  | 46576056  | 46583588  | 0.0370801 | chrX:046576056  | 0.0370801 |
| C6orf211        | 2179 chr6  | 151815222 | 151820303 | 0.0371809 | chr6:151815222  | 0.0371809 |
| FLJ20323        | 2181 chr7  | 7568276   | 7575450   | 0.0371843 | chr7:007568276  | 0.0371843 |
| TCF12           | 2189 chr15 | 54992977  | 55301407  | 0.0372232 | chr15:054992977 | 0.0372232 |
| CNKSR3          | 2193 chr6  | 154870710 | 154878944 | 0.0372433 | chr6:154870710  | 0.0372433 |
| CHRN2           | 2204 chr1  | 152806892 | 152809656 | 0.0372939 | chr1:152806892  | 0.0372939 |
| NEFM            | 2209 chr8  | 24821804  | 24829520  | 0.0373258 | chr8:024821804  | 0.0373258 |

|           |            |           |           |           |             |           |
|-----------|------------|-----------|-----------|-----------|-------------|-----------|
| CYP7B1    | 2213 chr8  | 65871307  | 65878966  | 0.0373363 | chr8:065871 | 0.0373363 |
| CCDC50    | 2223 chr3  | 192526582 | 192532528 | 0.0374013 | chr3:192530 | 0.0374013 |
| CCDC17    | 2225 chr1  | 45859749  | 45864065  | 0.0374041 | chr1:04586  | 0.0374041 |
| LTB       | 2226 chr6  | 31655812  | 31658095  | 0.0374119 | chr6:031656 | 0.0374119 |
| CKB       | 2236 chr14 | 103056222 | 103058750 | 0.037457  | chr14:10305 | 0.037457  |
| LOC339524 | 2240 chr1  | 87365269  | 87372726  | 0.0374791 | chr1:087370 | 0.0374791 |
| C22orf13  | 2251 chr22 | 23276416  | 23281255  | 0.0375321 | chr22:02328 | 0.0375321 |
| SOCS3     | 2256 chr17 | 73864357  | 73873229  | 0.0375633 | chr17:07386 | 0.0375633 |
| PARP12    | 2268 chr7  | 139406758 | 139410930 | 0.0376188 | chr7:139408 | 0.0376188 |
| ARL10     | 2279 chr5  | 175725227 | 175726474 | 0.0376645 | chr5:175726 | 0.0376645 |
| FAM50B    | 2285 chr6  | 3789359   | 3796753   | 0.0377054 | chr6:00379  | 0.0377054 |
| K-ALPHA-1 | 2297 chr12 | 47809235  | 47813511  | 0.037769  | chr12:0478  | 0.037769  |
| VAV3      | 2303 chr1  | 108306682 | 108314153 | 0.0377961 | chr1:108308 | 0.0377961 |
| TNIP2     | 2316 chr4  | 2725320   | 2733384   | 0.0378565 | chr4:00272  | 0.0378565 |
| GCC1      | 2321 chr7  | 127009253 | 127012875 | 0.0378837 | chr7:127012 | 0.0378837 |
| TUBB2C    | 2336 chr9  | 139250952 | 139257939 | 0.0379577 | chr9:139256 | 0.0379577 |
| LRCH2     | 2345 chrX  | 114329687 | 114380386 | 0.0379911 | chrX:114330 | 0.0379911 |
| TSSK6     | 2349 chr19 | 19482550  | 19487422  | 0.0380035 | chr19:01948 | 0.0380035 |
| DHFR      | 2368 chr5  | 79986198  | 79991602  | 0.038085  | chr5:079986 | 0.038085  |
| ABHD6     | 2372 chr3  | 58193962  | 58200631  | 0.0380943 | chr3:058198 | 0.0380943 |
| EPB41L3   | 2374 chr18 | 5531626   | 5539393   | 0.0381013 | chr18:00553 | 0.0381013 |
| C4orf20   | 2375 chr4  | 186581838 | 186589531 | 0.0381015 | chr4:186584 | 0.0381015 |
| C4orf31   | 2386 chr4  | 122210894 | 122218177 | 0.0381505 | chr4:122212 | 0.0381505 |
| C15orf17  | 2396 chr15 | 72983931  | 72991052  | 0.0382154 | chr15:07298 | 0.0382154 |
| SYT7      | 2399 chr11 | 61102413  | 61110335  | 0.0382331 | chr11:06110 | 0.0382331 |
| LLGL2     | 2401 chr17 | 71032531  | 71053472  | 0.038235  | chr17:07103 | 0.038235  |
| TACSTD2   | 2404 chr1  | 58813385  | 58820248  | 0.0382387 | chr1:058814 | 0.0382387 |
| GZF1      | 2405 chr20 | 23289020  | 23295460  | 0.0382408 | chr20:02329 | 0.0382408 |
| NEK1      | 2406 chr4  | 170768575 | 170770138 | 0.0382432 | chr4:170770 | 0.0382432 |
| C9orf100  | 2410 chr9  | 35652750  | 35655224  | 0.0382694 | chr9:035655 | 0.0382694 |
| C6orf47   | 2412 chr6  | 31734085  | 31737868  | 0.0382743 | chr6:031736 | 0.0382743 |
| NUFIP2    | 2414 chr17 | 24642755  | 24649732  | 0.0382868 | chr17:02464 | 0.0382868 |
| RASL12    | 2423 chr15 | 63144704  | 63152087  | 0.0383522 | chr15:06314 | 0.0383522 |
| GOLPH4    | 2437 chr3  | 169293382 | 169301811 | 0.038434  | chr3:169295 | 0.038434  |
| TIMM13    | 2438 chr19 | 2376621   | 2379072   | 0.0384381 | chr19:00237 | 0.0384381 |
| C1orf82   | 2446 chr1  | 92537275  | 92542623  | 0.0384939 | chr1:092537 | 0.0384939 |
| PCM1      | 2448 chr8  | 17819323  | 17827261  | 0.038508  | chr8:017825 | 0.038508  |
| SCGN      | 2450 chr6  | 25755942  | 25763092  | 0.0385133 | chr6:025760 | 0.0385133 |
| C3orf59   | 2458 chr3  | 194115789 | 194124136 | 0.0385483 | chr3:194118 | 0.0385483 |
| TMEM121   | 2459 chr14 | 105063470 | 105068670 | 0.0385561 | chr14:10506 | 0.0385561 |
| CALR      | 2465 chr19 | 12910545  | 12916025  | 0.0385991 | chr19:01291 | 0.0385991 |
| RMI1      | 2490 chr9  | 85785570  | 85790315  | 0.0387105 | chr9:085785 | 0.0387105 |
| DUSP22    | 2507 chr6  | 231621    | 240063    | 0.0387965 | chr6:000237 | 0.0387965 |
| MRPL41    | 2508 chr9  | 139566147 | 139567819 | 0.0387997 | chr9:139566 | 0.0387997 |
| C8orf76   | 2517 chr8  | 124320335 | 124326676 | 0.0388329 | chr8:124322 | 0.0388329 |
| RPL39L    | 2518 chr3  | 188338600 | 188342357 | 0.0388348 | chr3:188339 | 0.0388348 |
| IL13      | 2523 chr5  | 132016926 | 132024236 | 0.0388508 | chr5:132022 | 0.0388508 |
| FLJ10159  | 2533 chr6  | 107912957 | 107920935 | 0.038891  | chr6:107919 | 0.038891  |
| ST6GALNA  | 2539 chr9  | 129697952 | 129707064 | 0.038926  | chr9:129700 | 0.038926  |
| MKRN3     | 2545 chr15 | 21356596  | 21364500  | 0.0389515 | chr15:02136 | 0.0389515 |
| PPFIBP1   | 2560 chr12 | 27562866  | 27739309  | 0.0390569 | chr12:02756 | 0.0390569 |
| IRGQ      | 2561 chr19 | 48786988  | 48791274  | 0.03906   | chr19:04878 | 0.03906   |
| C7orf31   | 2563 chr7  | 25183663  | 25191965  | 0.0390867 | chr7:025186 | 0.0390867 |
| NDUFA11   | 2564 chr19 | 5850854   | 5855004   | 0.0390874 | chr19:00585 | 0.0390874 |
| ENDOG     | 2574 chr9  | 130620242 | 130623251 | 0.0391329 | chr9:13062  | 0.0391329 |
| ARVCF     | 2575 chr22 | 18382165  | 18384199  | 0.0391333 | chr22:01838 | 0.0391333 |
| B3GNT2    | 2578 chr2  | 62274012  | 62279244  | 0.0391384 | chr2:062278 | 0.0391384 |
| ATXN7     | 2584 chr3  | 63825281  | 63830003  | 0.0391656 | chr3:063828 | 0.0391656 |

|          |            |           |           |           |             |           |
|----------|------------|-----------|-----------|-----------|-------------|-----------|
| CDH2     | 2586 chr18 | 24008571  | 24016616  | 0.0391789 | chr18:02400 | 0.0391789 |
| ZZEF1    | 2587 chr17 | 3987805   | 3992946   | 0.0391841 | chr17:00399 | 0.0391841 |
| NCDN     | 2590 chr1  | 35796005  | 35800881  | 0.0391972 | chr1:035798 | 0.0391972 |
| DUS3L    | 2592 chr19 | 5736445   | 5746713   | 0.0392219 | chr19:00574 | 0.0392219 |
| ZCCHC17  | 2594 chr1  | 31542566  | 31547335  | 0.0392474 | chr1:031544 | 0.0392474 |
| ARRDC2   | 2606 chr19 | 17974459  | 17982508  | 0.0393433 | chr19:01798 | 0.0393433 |
| ADAM22   | 2609 chr7  | 87400653  | 87403728  | 0.0393521 | chr7:087402 | 0.0393521 |
| ZNF232   | 2620 chr17 | 4953356   | 4966865   | 0.0394237 | chr17:00496 | 0.0394237 |
| CYP4V2   | 2623 chr4  | 187346175 | 187352436 | 0.03945   | chr4:187350 | 0.03945   |
| STXBP6   | 2632 chr14 | 24586434  | 24594297  | 0.0395199 | chr14:02458 | 0.0395199 |
| SLC35A5  | 2654 chr3  | 113763616 | 113765557 | 0.0396264 | chr3:113763 | 0.0396264 |
| NKTR     | 2659 chr3  | 42612261  | 42619948  | 0.0396469 | chr3:042617 | 0.0396469 |
| CA9      | 2660 chr9  | 35664017  | 35666330  | 0.0396506 | chr9:035664 | 0.0396506 |
| ARPC1A   | 2667 chr7  | 98756782  | 98763511  | 0.0396784 | chr7:098767 | 0.0396784 |
| TMEM55A  | 2669 chr8  | 92119744  | 92125654  | 0.0397016 | chr8:092127 | 0.0397016 |
| ACTN2    | 2672 chr1  | 234914383 | 234919038 | 0.0397088 | chr1:234916 | 0.0397088 |
| CBLN2    | 2675 chr18 | 68359367  | 68368030  | 0.03972   | chr18:06836 | 0.03972   |
| GIPC2    | 2720 chr1  | 78279081  | 78285802  | 0.0399202 | chr1:078284 | 0.0399202 |
| RNF151   | 2729 chr16 | 1955320   | 1958819   | 0.0399675 | chr16:00195 | 0.0399675 |
| FLJ23577 | 2734 chr5  | 35648848  | 35656216  | 0.0399795 | chr5:035655 | 0.0399795 |
| GADD45B  | 2742 chr19 | 2423856   | 2429726   | 0.0400005 | chr19:00242 | 0.0400005 |
| ZDHC12   | 2743 chr9  | 130523687 | 130531421 | 0.0400033 | chr9:130524 | 0.0400033 |
| NDUFV3   | 2757 chr21 | 43183040  | 43188255  | 0.0400913 | chr21:04318 | 0.0400913 |
| C19orf59 | 2769 chr19 | 7641371   | 7650708   | 0.0401412 | chr19:00764 | 0.0401412 |
| POU6F1   | 2771 chr12 | 49895765  | 49899807  | 0.0401468 | chr12:04989 | 0.0401468 |
| TWIST1   | 2774 chr7  | 19121019  | 19129123  | 0.0401642 | chr7:019122 | 0.0401642 |
| PLA2G2E  | 2783 chr1  | 20120249  | 20125966  | 0.0401998 | chr1:020127 | 0.0401998 |
| C1orf93  | 2791 chr1  | 2502810   | 2510677   | 0.0402321 | chr1:002508 | 0.0402321 |
| CAPN9    | 2831 chr1  | 228945808 | 228952042 | 0.0404381 | chr1:228950 | 0.0404381 |
| RAD54L   | 2832 chr1  | 46481608  | 46488912  | 0.0404385 | chr1:046486 | 0.0404385 |
| SPTLC1   | 2841 chr9  | 93915384  | 93919970  | 0.0404774 | chr9:093917 | 0.0404774 |
| SLC7A1   | 2846 chr13 | 29065119  | 29070727  | 0.0405186 | chr13:02906 | 0.0405186 |
| SOX1     | 2848 chr13 | 111764575 | 111772443 | 0.0405256 | chr13:11177 | 0.0405256 |
| PCDHGA11 | 2851 chr5  | 140780254 | 140783205 | 0.0405603 | chr5:140783 | 0.0405603 |
| TMEM116  | 2862 chr12 | 110930720 | 110935303 | 0.0406167 | chr12:11093 | 0.0406167 |
| FLJ10324 | 2877 chr7  | 4888046   | 4894918   | 0.0406862 | chr7:004888 | 0.0406862 |
| GMPS     | 2879 chr3  | 157068699 | 157073602 | 0.0406901 | chr3:157073 | 0.0406901 |
| NDFIP2   | 2880 chr13 | 78948000  | 78955989  | 0.0407054 | chr13:07894 | 0.0407054 |
| SLC26A10 | 2884 chr12 | 56297416  | 56302453  | 0.0407302 | chr12:05630 | 0.0407302 |
| NOV      | 2886 chr8  | 120492951 | 120500295 | 0.0407467 | chr8:120497 | 0.0407467 |
| PPA2     | 2907 chr4  | 106612134 | 106620202 | 0.0408654 | chr4:106614 | 0.0408654 |
| C16orf80 | 2918 chr16 | 56718330  | 56723511  | 0.0409312 | chr16:05672 | 0.0409312 |
| FAM89A   | 2930 chr1  | 229240220 | 229248054 | 0.0409834 | chr1:229242 | 0.0409834 |
| VAPB     | 2931 chr20 | 56392151  | 56400339  | 0.0409855 | chr20:05639 | 0.0409855 |
| ARIH1    | 2932 chr15 | 70548917  | 70556348  | 0.0410014 | chr15:07054 | 0.0410014 |
| ICAM5    | 2933 chr19 | 10260363  | 10264170  | 0.0410083 | chr19:01026 | 0.0410083 |
| GPR64    | 2936 chrX  | 18917386  | 19056047  | 0.0410148 | chrX:019056 | 0.0410148 |
| ANKRD49  | 2943 chr11 | 93866867  | 93872069  | 0.0410407 | chr11:09386 | 0.0410407 |
| DNAJC6   | 2946 chr1  | 65493101  | 65654046  | 0.0410576 | chr1:065504 | 0.0410576 |
| CCNJ     | 2949 chr10 | 97789972  | 97796610  | 0.0410618 | chr10:09778 | 0.0410618 |
| C9orf43  | 2958 chr9  | 115212908 | 115218211 | 0.0410905 | chr9:115212 | 0.0410905 |
| ZNF75    | 2959 chrX  | 134300958 | 134305628 | 0.0410943 | chrX:134300 | 0.0410943 |
| MND1     | 2966 chr4  | 154479967 | 154487564 | 0.0411156 | chr4:154487 | 0.0411156 |
| GPM6A    | 2975 chr4  | 176967902 | 177163432 | 0.0411559 | chr4:177160 | 0.0411559 |
| TRIM14   | 2979 chr9  | 99919998  | 99925528  | 0.0411824 | chr9:099920 | 0.0411824 |
| PTHR1    | 2987 chr3  | 46894739  | 46902552  | 0.0412259 | chr3:046899 | 0.0412259 |
| SOX2     | 2988 chr3  | 182907129 | 182915297 | 0.0412284 | chr3:182915 | 0.0412284 |
| ORAOV1   | 2991 chr11 | 69197294  | 69204453  | 0.0412428 | chr11:06919 | 0.0412428 |

|          |            |           |           |           |             |           |
|----------|------------|-----------|-----------|-----------|-------------|-----------|
| C5orf14  | 3006 chr5  | 134235425 | 134264907 | 0.0413108 | chr5:134235 | 0.0413108 |
| DDEFL1   | 3024 chr1  | 23680837  | 23688813  | 0.0414083 | chr1:023680 | 0.0414083 |
| KLHL17   | 3036 chr1  | 885874    | 890972    | 0.0414699 | chr1:000885 | 0.0414699 |
| MGC29891 | 3038 chr1  | 149307994 | 149311312 | 0.041477  | chr1:149307 | 0.041477  |
| PKN1     | 3046 chr19 | 14403711  | 14443957  | 0.0415113 | chr19:0144  | 0.0415113 |
| ZBTB5    | 3048 chr9  | 37453126  | 37458144  | 0.0415156 | chr9:037453 | 0.0415156 |
| TRIM23   | 3056 chr5  | 64951101  | 64955857  | 0.0415559 | chr5:064951 | 0.0415559 |
| TRAF5    | 3068 chr1  | 209562349 | 209587798 | 0.041615  | chr1:209562 | 0.041615  |
| CDKL5    | 3076 chrX  | 18348429  | 18356200  | 0.0416664 | chrX:018356 | 0.0416664 |
| SC65     | 3079 chr17 | 37217692  | 37221966  | 0.0416687 | chr17:03721 | 0.0416687 |
| ADCY4    | 3081 chr14 | 23856783  | 23874948  | 0.0416776 | chr14:02385 | 0.0416776 |
| STRA8    | 3083 chr7  | 134563875 | 134569370 | 0.0416939 | chr7:134563 | 0.0416939 |
| C1orf144 | 3105 chr1  | 16562480  | 16568348  | 0.0417995 | chr1:016562 | 0.0417995 |
| GIN54    | 3110 chr8  | 41500858  | 41508504  | 0.041828  | chr8:041500 | 0.041828  |
| VPS13A   | 3122 chr9  | 78977140  | 78983960  | 0.0419197 | chr9:078977 | 0.0419197 |
| C1orf97  | 3123 chr1  | 209617465 | 209624608 | 0.0419237 | chr1:209617 | 0.0419237 |
| FAM60A   | 3124 chr12 | 31367909  | 31375887  | 0.041932  | chr12:03136 | 0.041932  |
| HIBADH   | 3139 chr7  | 27666848  | 27674541  | 0.0419873 | chr7:027666 | 0.0419873 |
| HNRNPG-T | 3151 chr11 | 7065594   | 7069306   | 0.0420595 | chr11:00706 | 0.0420595 |
| RGAG4    | 3155 chrX  | 71266013  | 71268197  | 0.042073  | chrX:071266 | 0.042073  |
| HS2ST1   | 3163 chr1  | 87152982  | 87158176  | 0.0421246 | chr1:087152 | 0.0421246 |
| WDR34    | 3170 chr9  | 130456329 | 130461328 | 0.0421479 | chr9:130456 | 0.0421479 |
| FBXW8    | 3177 chr12 | 115827640 | 115835051 | 0.0421813 | chr12:11582 | 0.0421813 |
| MPP2     | 3183 chr17 | 39338325  | 39350113  | 0.0422023 | chr17:03933 | 0.0422023 |
| ANGPTL2  | 3193 chr9  | 128922399 | 128929716 | 0.0422824 | chr9:128922 | 0.0422824 |
| OSTF1    | 3195 chr9  | 76893386  | 76898482  | 0.0423049 | chr9:076893 | 0.0423049 |
| FKBP1A   | 3198 chr20 | 1319246   | 1325066   | 0.0423118 | chr20:00131 | 0.0423118 |
| RND3     | 3202 chr2  | 151049781 | 151057824 | 0.0423382 | chr2:151050 | 0.0423382 |
| TFEB     | 3204 chr6  | 41808532  | 41812212  | 0.0423537 | chr6:041808 | 0.0423537 |
| TBC1D1   | 3206 chr4  | 37563736  | 37640795  | 0.0423579 | chr4:037563 | 0.0423579 |
| BLVRA    | 3208 chr7  | 43759503  | 43766831  | 0.0423606 | chr7:043756 | 0.0423606 |
| HNRPM    | 3214 chr19 | 8410611   | 8418303   | 0.0423728 | chr19:0084  | 0.0423728 |
| KLHL34   | 3217 chrX  | 21583333  | 21591883  | 0.0423863 | chrX:021583 | 0.0423863 |
| SPATA5L1 | 3219 chr15 | 43477779  | 43483869  | 0.042406  | chr15:04347 | 0.042406  |
| STARD8   | 3223 chrX  | 67778909  | 67786646  | 0.0424195 | chrX:067778 | 0.0424195 |
| HSDL1    | 3224 chr16 | 82713393  | 82736224  | 0.0424205 | chr16:08271 | 0.0424205 |
| HMGA1    | 3225 chr6  | 34307706  | 34318994  | 0.0424301 | chr6:034311 | 0.0424301 |
| SSNA1    | 3234 chr9  | 139203021 | 139205270 | 0.0424828 | chr9:139203 | 0.0424828 |
| DOHH     | 3238 chr19 | 3445336   | 3459749   | 0.0425094 | chr19:00344 | 0.0425094 |
| KCNA3    | 3261 chr1  | 111016398 | 111022048 | 0.0426057 | chr1:111017 | 0.0426057 |
| VAPA     | 3276 chr18 | 9898739   | 9906646   | 0.0426565 | chr18:00990 | 0.0426565 |
| KIAA1875 | 3297 chr8  | 145234671 | 145237082 | 0.042814  | chr8:145234 | 0.042814  |
| PLCB3    | 3309 chr11 | 63775824  | 63778195  | 0.0428476 | chr11:06377 | 0.0428476 |
| SMTNL2   | 3313 chr17 | 4429473   | 4436551   | 0.042877  | chr17:00442 | 0.042877  |
| NDUFS7   | 3332 chr19 | 1329434   | 1337181   | 0.042946  | chr19:00132 | 0.042946  |
| ZFP42    | 3333 chr4  | 189148902 | 189155752 | 0.0429509 | chr4:189155 | 0.0429509 |
| SOX30    | 3335 chr5  | 157009747 | 157012243 | 0.0429605 | chr5:157011 | 0.0429605 |
| CCDC71   | 3337 chr3  | 49176408  | 49178712  | 0.042964  | chr3:049176 | 0.042964  |
| MGLL     | 3339 chr3  | 129021521 | 129029396 | 0.0429768 | chr3:129021 | 0.0429768 |
| PPP1R3D  | 3344 chr20 | 57945290  | 57948624  | 0.0430105 | chr20:05794 | 0.0430105 |
| CHMP5    | 3354 chr9  | 33255014  | 33259158  | 0.0430845 | chr9:033255 | 0.0430845 |
| CDCP1    | 3365 chr3  | 45160435  | 45164863  | 0.0431505 | chr3:045160 | 0.0431505 |
| VDAC1    | 3372 chr5  | 133336492 | 133373895 | 0.0431619 | chr5:133336 | 0.0431619 |
| RASL10A  | 3375 chr22 | 28039003  | 28045489  | 0.0431811 | chr22:02803 | 0.0431811 |
| PLOD2    | 3384 chr3  | 147358996 | 147367321 | 0.0432365 | chr3:147358 | 0.0432365 |
| CACNA1D  | 3393 chr3  | 53498786  | 53506685  | 0.0432884 | chr3:053500 | 0.0432884 |
| CCDC101  | 3406 chr16 | 28468085  | 28473295  | 0.0433546 | chr16:02847 | 0.0433546 |
| SELT     | 3418 chr3  | 151798486 | 151806172 | 0.0433858 | chr3:151806 | 0.0433858 |

|          |            |           |           |           |             |           |
|----------|------------|-----------|-----------|-----------|-------------|-----------|
| C16orf58 | 3424 chr16 | 31425715  | 31431331  | 0.043413  | chr16:03142 | 0.043413  |
| CHRD1    | 3442 chrX  | 109923203 | 109931151 | 0.0434816 | chrX:10992  | 0.0434816 |
| MUC1     | 3444 chr1  | 153426971 | 153429242 | 0.0434856 | chr1:15342  | 0.0434856 |
| TRPC7    | 3466 chr5  | 135718566 | 135725973 | 0.0436477 | chr5:13572  | 0.0436477 |
| H1FNT    | 3467 chr12 | 47006329  | 47011739  | 0.0436511 | chr12:0470  | 0.0436511 |
| PITX3    | 3486 chr10 | 103988794 | 103991039 | 0.0437276 | chr10:1039  | 0.0437276 |
| C1orf94  | 3502 chr1  | 34414536  | 34418201  | 0.0438076 | chr1:03441  | 0.0438076 |
| TRIM47   | 3504 chr17 | 71383200  | 71391178  | 0.0438205 | chr17:0713  | 0.0438205 |
| SKP2     | 3516 chr5  | 36187953  | 36192589  | 0.043865  | chr5:03618  | 0.043865  |
| PSMB9    | 3527 chr6  | 32929906  | 32935243  | 0.0439364 | chr6:0329   | 0.0439364 |
| CAND1    | 3528 chr12 | 65944529  | 65952235  | 0.043949  | chr12:0659  | 0.043949  |
| CDC25C   | 3529 chr5  | 137692272 | 137695398 | 0.043955  | chr5:13769  | 0.043955  |
| NOS1     | 3532 chr12 | 116281639 | 116289305 | 0.0439683 | chr12:1162  | 0.0439683 |
| ZNF692   | 3538 chr1  | 247117362 | 247125369 | 0.0439921 | chr1:2471   | 0.0439921 |
| PERP     | 3540 chr6  | 138468003 | 138475764 | 0.0440037 | chr6:1384   | 0.0440037 |
| CHST11   | 3541 chr12 | 103369938 | 103377755 | 0.0440072 | chr12:1033  | 0.0440072 |
| RNF103   | 3568 chr2  | 86701144  | 86708020  | 0.0441447 | chr2:0867   | 0.0441447 |
| IL6R     | 3584 chr1  | 152639195 | 152647171 | 0.0442452 | chr1:1526   | 0.0442452 |
| DNAJA2   | 3585 chr16 | 45562570  | 45568887  | 0.0442525 | chr16:0455  | 0.0442525 |
| JARID1B  | 3588 chr1  | 201041667 | 201052028 | 0.0442931 | chr1:2010   | 0.0442931 |
| FMR1NB   | 3591 chrX  | 146865391 | 146871066 | 0.0443033 | chrX:1468   | 0.0443033 |
| PSENE1   | 3594 chr19 | 40928375  | 40929656  | 0.0443141 | chr19:040   | 0.0443141 |
| HAS2     | 3598 chr8  | 122719857 | 122725936 | 0.0443248 | chr8:1227   | 0.0443248 |
| SLC7A14  | 3603 chr3  | 171784235 | 171792045 | 0.0443599 | chr3:1717   | 0.0443599 |
| SART1    | 3605 chr11 | 65484196  | 65488222  | 0.0443658 | chr11:065   | 0.0443658 |
| TOR1B    | 3612 chr9  | 131601175 | 131607757 | 0.0443904 | chr9:1316   | 0.0443904 |
| HTR2C    | 3617 chrX  | 113720089 | 113965715 | 0.0444094 | chrX:1137   | 0.0444094 |
| TFG      | 3618 chr3  | 101906005 | 101913320 | 0.0444123 | chr3:1019   | 0.0444123 |
| H2AFJ    | 3622 chr12 | 14818633  | 14821182  | 0.0444245 | chr12:014   | 0.0444245 |
| JPH3     | 3623 chr16 | 86189041  | 86197099  | 0.0444278 | chr16:086   | 0.0444278 |
| LAP3     | 3628 chr4  | 17184894  | 17190543  | 0.0444474 | chr4:017    | 0.0444474 |
| SOX18    | 3629 chr20 | 62148140  | 62151088  | 0.044449  | chr20:062   | 0.044449  |
| DPYSL3   | 3635 chr5  | 146810917 | 146818816 | 0.0444817 | chr5:1468   | 0.0444817 |
| UROS     | 3638 chr10 | 127497082 | 127501692 | 0.0444929 | chr10:127   | 0.0444929 |
| PPIA     | 3639 chr7  | 44797328  | 44805170  | 0.0444931 | chr7:044    | 0.0444931 |
| AGXT     | 3654 chr2  | 241451468 | 241459390 | 0.0445587 | chr2:241    | 0.0445587 |
| GJA5     | 3674 chr1  | 145696980 | 145717558 | 0.0446688 | chr1:145    | 0.0446688 |
| HOXB9    | 3690 chr17 | 44056215  | 44064802  | 0.0447584 | chr17:044   | 0.0447584 |
| DHX33    | 3691 chr17 | 5286320   | 5318348   | 0.0447593 | chr17:005   | 0.0447593 |
| SNX17    | 3696 chr2  | 27446890  | 27452176  | 0.0447747 | chr2:027    | 0.0447747 |
| GOLPH3   | 3710 chr5  | 32208095  | 32215590  | 0.0448319 | chr5:032    | 0.0448319 |
| SLC9A2   | 3712 chr2  | 102597273 | 102605097 | 0.0448448 | chr2:102    | 0.0448448 |
| CYP1A1   | 3715 chr15 | 72802451  | 72810417  | 0.0448489 | chr15:07    | 0.0448489 |
| REM1     | 3720 chr20 | 29526750  | 29528913  | 0.0448731 | chr20:02    | 0.0448731 |
| IL1F10   | 3726 chr2  | 113538853 | 113549190 | 0.0449142 | chr2:113    | 0.0449142 |
| C14orf37 | 3728 chr14 | 57686288  | 57694162  | 0.0449261 | chr14:05    | 0.0449261 |
| CUL5     | 3733 chr11 | 107381092 | 107387043 | 0.044969  | chr11:10    | 0.044969  |
| GSCL     | 3744 chr22 | 17516541  | 17522840  | 0.0450417 | chr22:01    | 0.0450417 |
| ITCH     | 3772 chr20 | 32413474  | 32562865  | 0.0452068 | chr20:03    | 0.0452068 |
| FN1      | 3779 chr2  | 216006451 | 216013947 | 0.0452386 | chr2:216    | 0.0452386 |
| ADAM33   | 3783 chr20 | 3597248   | 3615641   | 0.0452535 | chr20:00    | 0.0452535 |
| GMEB1    | 3785 chr1  | 28862968  | 28870242  | 0.0452536 | chr1:028    | 0.0452536 |
| ATP6AP2  | 3790 chrX  | 40319704  | 40327501  | 0.0452905 | chrX:040    | 0.0452905 |
| NUBP2    | 3792 chr16 | 1773039   | 1778025   | 0.0453035 | chr16:00    | 0.0453035 |
| ISCA1    | 3796 chr9  | 88084757  | 88092819  | 0.0453225 | chr9:088    | 0.0453225 |
| TMEM46   | 3798 chr13 | 25520762  | 25527702  | 0.0453376 | chr13:02    | 0.0453376 |
| PLXDC2   | 3807 chr10 | 20140686  | 20148481  | 0.0453692 | chr10:02    | 0.0453692 |
| C9orf7   | 3818 chr9  | 135314334 | 135317446 | 0.0454386 | chr9:135    | 0.0454386 |



|          |            |           |           |           |             |           |
|----------|------------|-----------|-----------|-----------|-------------|-----------|
| ZCCHC8   | 3819 chr12 | 121549101 | 121554785 | 0.0454464 | chr12:12154 | 0.0454464 |
| BMPR1A   | 3823 chr10 | 88501044  | 88628273  | 0.0454666 | chr10:08850 | 0.0454666 |
| PIP5K2C  | 3827 chr12 | 56265776  | 56283260  | 0.0454853 | chr12:05627 | 0.0454853 |
| SRD5A2L  | 3833 chr4  | 55904373  | 55909490  | 0.0455028 | chr4:05590  | 0.0455028 |
| SFRP1    | 3840 chr8  | 41283839  | 41290635  | 0.0455692 | chr8:04128  | 0.0455692 |
| CUEDC2   | 3851 chr10 | 104173041 | 104182350 | 0.04562   | chr10:10418 | 0.04562   |
| CENPH    | 3852 chr5  | 68516125  | 68523460  | 0.0456281 | chr5:06852  | 0.0456281 |
| SLC25A21 | 3861 chr14 | 36708940  | 36715384  | 0.0456806 | chr14:0367  | 0.0456806 |
| SLC25A28 | 3866 chr10 | 101368250 | 101373317 | 0.0456943 | chr10:10136 | 0.0456943 |
| HNRPA2B1 | 3868 chr7  | 26202137  | 26206734  | 0.0456979 | chr7:02620  | 0.0456979 |
| AP4M1    | 3870 chr7  | 99537165  | 99542658  | 0.0457089 | chr7:09953  | 0.0457089 |
| NAPA     | 3895 chr19 | 52682812  | 52715815  | 0.0458459 | chr19:0527  | 0.0458459 |
| PIP5K2A  | 3904 chr10 | 23040800  | 23048726  | 0.0458934 | chr10:0230  | 0.0458934 |
| GABRA5   | 3906 chr15 | 24660177  | 24665568  | 0.0458949 | chr15:0246  | 0.0458949 |
| TXNL6    | 3919 chr19 | 17430329  | 17432654  | 0.0460045 | chr19:0174  | 0.0460045 |
| NDUFS6   | 3946 chr5  | 1854538   | 1857714   | 0.0460997 | chr5:00185  | 0.0460997 |
| C20orf3  | 3952 chr20 | 24918831  | 24926868  | 0.0461291 | chr20:0249  | 0.0461291 |
| EDARADD  | 3966 chr1  | 234618967 | 234627893 | 0.0462316 | chr1:23462  | 0.0462316 |
| ZNF697   | 3973 chr1  | 119965171 | 119972839 | 0.0462954 | chr1:11996  | 0.0462954 |
| TMBIM4   | 3974 chr12 | 64849297  | 64851896  | 0.0462989 | chr12:0648  | 0.0462989 |
| KLHL15   | 3978 chrX  | 23952709  | 23959691  | 0.0463138 | chrX:02395  | 0.0463138 |
| PEX6     | 3989 chr6  | 43052382  | 43054652  | 0.0463797 | chr6:04305  | 0.0463797 |
| MGEA5    | 3990 chr10 | 103534273 | 103573039 | 0.0463815 | chr10:1035  | 0.0463815 |
| CDC5L    | 3996 chr6  | 44458086  | 44466026  | 0.0464295 | chr6:04446  | 0.0464295 |
| DSCR6    | 4000 chr21 | 37295531  | 37303415  | 0.0464434 | chr21:0373  | 0.0464434 |
| SFRS1    | 4002 chr17 | 53437137  | 53444286  | 0.0464606 | chr17:0534  | 0.0464606 |
| NRP2     | 4003 chr2  | 206249506 | 206258643 | 0.0464744 | chr2:20625  | 0.0464744 |
| CSNK1G3  | 4009 chr5  | 122870388 | 122911761 | 0.0464909 | chr5:12287  | 0.0464909 |
| C10orf9  | 4013 chr10 | 35660599  | 35668503  | 0.0465139 | chr10:0356  | 0.0465139 |
| BCAS4    | 4023 chr20 | 48839901  | 48845685  | 0.0465503 | chr20:0488  | 0.0465503 |
| GALNT14  | 4024 chr2  | 31212164  | 31220558  | 0.0465544 | chr2:03121  | 0.0465544 |
| DLG4     | 4025 chr17 | 7058583   | 7063760   | 0.0465588 | chr17:0070  | 0.0465588 |
| SAFB     | 4029 chr19 | 5574145   | 5578974   | 0.046567  | chr19:0055  | 0.046567  |
| BAI1     | 4034 chr8  | 143537307 | 143544775 | 0.0466217 | chr8:14354  | 0.0466217 |
| ALS2CR2  | 4037 chr2  | 202024703 | 202029728 | 0.0466325 | chr2:20202  | 0.0466325 |
| RBL2     | 4043 chr16 | 52021366  | 52028457  | 0.0466428 | chr16:0520  | 0.0466428 |
| RANGNRF  | 4053 chr17 | 8131889   | 8134137   | 0.0466871 | chr17:0081  | 0.0466871 |
| SMPDL3B  | 4056 chr1  | 28129416  | 28158058  | 0.0467136 | chr1:02815  | 0.0467136 |
| KCNG3    | 4057 chr2  | 42571721  | 42578948  | 0.0467282 | chr2:04257  | 0.0467282 |
| TP73     | 4065 chr1  | 3559184   | 3591255   | 0.0467709 | chr1:00358  | 0.0467709 |
| SOX5     | 4066 chr12 | 23991389  | 24612164  | 0.0467714 | chr12:0246  | 0.0467714 |
| OXSRI    | 4067 chr3  | 38179424  | 38184593  | 0.0467776 | chr3:03818  | 0.0467776 |
| ZMYM6    | 4071 chr1  | 35268217  | 35270261  | 0.0467844 | chr1:03527  | 0.0467844 |
| CLTCL1   | 4072 chr22 | 17657242  | 17662973  | 0.046787  | chr22:0176  | 0.046787  |
| HYOU1    | 4076 chr11 | 118429804 | 118433600 | 0.046794  | chr11:1184  | 0.046794  |
| SLC37A4  | 4093 chr11 | 118402904 | 118408060 | 0.0468586 | chr11:1184  | 0.0468586 |
| CXorf57  | 4096 chrX  | 105737242 | 105744068 | 0.0468675 | chrX:10574  | 0.0468675 |
| HMG20B   | 4118 chr19 | 3519061   | 3527962   | 0.0469937 | chr19:0035  | 0.0469937 |
| RRBP1    | 4125 chr20 | 17586845  | 17615748  | 0.0470315 | chr20:0176  | 0.0470315 |
| PRKCDBP  | 4129 chr11 | 6296109   | 6303755   | 0.0470427 | chr11:0062  | 0.0470427 |
| JAKMIP1  | 4133 chr4  | 6250612   | 6257828   | 0.0470621 | chr4:00625  | 0.0470621 |
| FIBP     | 4143 chr11 | 65408967  | 65412595  | 0.0470988 | chr11:0654  | 0.0470988 |
| FKBP7    | 4144 chr2  | 179048834 | 179051575 | 0.0471007 | chr2:17905  | 0.0471007 |
| LOXL1    | 4150 chr15 | 72000819  | 72008627  | 0.0471216 | chr15:0720  | 0.0471216 |
| PARD6G   | 4156 chr18 | 76103928  | 76111908  | 0.0471488 | chr18:0761  | 0.0471488 |
| ZNF274   | 4162 chr19 | 63381087  | 63389429  | 0.0471662 | chr19:0633  | 0.0471662 |
| ARD1A    | 4163 chrX  | 152848557 | 152853937 | 0.0471748 | chrX:15284  | 0.0471748 |
| ZFP28    | 4165 chr19 | 61737949  | 61743235  | 0.0471928 | chr19:0617  | 0.0471928 |

|          |            |           |           |           |             |           |
|----------|------------|-----------|-----------|-----------|-------------|-----------|
| NUPL1    | 4170 chr13 | 24769687  | 24776182  | 0.0472536 | chr13:02471 | 0.0472536 |
| POM121   | 4174 chr7  | 72031599  | 72036258  | 0.0472655 | chr7:072031 | 0.0472655 |
| C11orf31 | 4178 chr11 | 57265145  | 57268004  | 0.0472928 | chr11:05726 | 0.0472928 |
| DSC3     | 4181 chr18 | 26874396  | 26882060  | 0.0473086 | chr18:02687 | 0.0473086 |
| CDON     | 4182 chr11 | 125435951 | 125442668 | 0.0473092 | chr11:12543 | 0.0473092 |
| LGI3     | 4200 chr8  | 22060350  | 22070232  | 0.0474015 | chr8:022060 | 0.0474015 |
| NDUFA13  | 4201 chr19 | 19487670  | 19500020  | 0.0474023 | chr19:01948 | 0.0474023 |
| MCM6     | 4211 chr2  | 136313934 | 136353769 | 0.0474775 | chr2:136350 | 0.0474775 |
| ATP1A1   | 4215 chr1  | 116712366 | 116720088 | 0.0475059 | chr1:116711 | 0.0475059 |
| AUP1     | 4217 chr2  | 74610082  | 74613324  | 0.0475129 | chr2:074610 | 0.0475129 |
| XKR5     | 4221 chr8  | 6678826   | 6685991   | 0.047532  | chr8:006678 | 0.047532  |
| TSEN54   | 4225 chr17 | 71024310  | 71032378  | 0.0475477 | chr17:07102 | 0.0475477 |
| GPATCH8  | 4227 chr17 | 39934364  | 39941041  | 0.0475512 | chr17:03993 | 0.0475512 |
| GBE1     | 4254 chr3  | 81891143  | 81898224  | 0.0476779 | chr3:081891 | 0.0476779 |
| IER3     | 4264 chr6  | 30818949  | 30825711  | 0.0477317 | chr6:030820 | 0.0477317 |
| ISG15    | 4266 chr1  | 935853    | 939763    | 0.0477385 | chr1:000935 | 0.0477385 |
| PAX1     | 4275 chr20 | 21629195  | 21637601  | 0.0478022 | chr20:02162 | 0.0478022 |
| ZNF497   | 4277 chr19 | 63557842  | 63571390  | 0.0478143 | chr19:06355 | 0.0478143 |
| TSSK1    | 4281 chr5  | 112796424 | 112803226 | 0.047836  | chr5:112797 | 0.047836  |
| SEPT2    | 4290 chr2  | 241900286 | 241940783 | 0.0478897 | chr2:241900 | 0.0478897 |
| CACNG3   | 4305 chr16 | 24169567  | 24177927  | 0.0479529 | chr16:02417 | 0.0479529 |
| GNG10    | 4309 chr9  | 113458614 | 113465839 | 0.0479649 | chr9:113464 | 0.0479649 |
| CHRNA1   | 4325 chr17 | 7289135   | 7291605   | 0.0480355 | chr17:00728 | 0.0480355 |
| CDH23    | 4329 chr10 | 72821903  | 72829231  | 0.0480811 | chr10:07282 | 0.0480811 |
| SLC25A36 | 4332 chr3  | 142143271 | 142146059 | 0.0481041 | chr3:142143 | 0.0481041 |
| CAPN11   | 4333 chr6  | 44231330  | 44236455  | 0.0481091 | chr6:044231 | 0.0481091 |
| CD46     | 4341 chr1  | 205988752 | 205994554 | 0.0481422 | chr1:205992 | 0.0481422 |
| MPO      | 4355 chr17 | 53710661  | 53718566  | 0.0482067 | chr17:05371 | 0.0482067 |
| RERG     | 4366 chr12 | 15263607  | 15270134  | 0.0482648 | chr12:01526 | 0.0482648 |
| C3orf18  | 4369 chr3  | 50576566  | 50580144  | 0.0482687 | chr3:050576 | 0.0482687 |
| TRAPPC2L | 4376 chr16 | 87451145  | 87455221  | 0.0483381 | chr16:08745 | 0.0483381 |
| SYT10    | 4391 chr12 | 33481417  | 33489506  | 0.0484292 | chr12:03348 | 0.0484292 |
| FBXO28   | 4392 chr1  | 222363477 | 222370832 | 0.0484299 | chr1:222363 | 0.0484299 |
| BRI3BP   | 4399 chr12 | 124044211 | 124046360 | 0.048467  | chr12:12404 | 0.048467  |
| TAF7L    | 4400 chrX  | 100432363 | 100439818 | 0.0484705 | chrX:100432 | 0.0484705 |
| IFT20    | 4402 chr17 | 23681576  | 23686450  | 0.0484782 | chr17:02368 | 0.0484782 |
| KCNC1    | 4414 chr11 | 17709155  | 17716631  | 0.0485474 | chr11:01771 | 0.0485474 |
| C7orf49  | 4423 chr7  | 134501653 | 134506466 | 0.0485912 | chr7:134501 | 0.0485912 |
| PTPRCAP  | 4433 chr11 | 66959538  | 66961939  | 0.0486774 | chr11:06695 | 0.0486774 |
| RBM35A   | 4437 chr8  | 95717123  | 95724857  | 0.0486912 | chr8:095722 | 0.0486912 |
| CNFN     | 4445 chr19 | 47584698  | 47591718  | 0.0487214 | chr19:04758 | 0.0487214 |
| C14orf39 | 4450 chr14 | 60019587  | 60027513  | 0.0487474 | chr14:06002 | 0.0487474 |
| TNFSF11  | 4459 chr13 | 42038433  | 42048827  | 0.0487718 | chr13:04203 | 0.0487718 |
| LPL      | 4461 chr8  | 19838145  | 19843751  | 0.0487944 | chr8:019838 | 0.0487944 |
| ZNF508   | 4462 chr18 | 75963678  | 75970104  | 0.0487971 | chr18:07596 | 0.0487971 |
| FLJ31818 | 4464 chr7  | 112364601 | 112372575 | 0.0488071 | chr7:112364 | 0.0488071 |
| CDCA4    | 4467 chr14 | 104556534 | 104563657 | 0.0488364 | chr14:10455 | 0.0488364 |
| SPESP1   | 4471 chr15 | 67009944  | 67012498  | 0.048856  | chr15:06700 | 0.048856  |
| XK       | 4474 chrX  | 37424516  | 37432182  | 0.0488582 | chrX:037432 | 0.0488582 |
| SMAP1    | 4480 chr6  | 71429231  | 71436878  | 0.0488854 | chr6:071432 | 0.0488854 |
| EIF4E    | 4491 chr4  | 100066990 | 100075043 | 0.0489153 | chr4:100066 | 0.0489153 |
| ZBP2     | 4497 chr17 | 35278129  | 35280653  | 0.0489699 | chr17:03527 | 0.0489699 |
| PROK2    | 4498 chr3  | 71914427  | 71921716  | 0.0489729 | chr3:071914 | 0.0489729 |
| MCM8     | 4502 chr20 | 5879322   | 5884369   | 0.0489898 | chr20:00587 | 0.0489898 |
| PHLDA2   | 4503 chr11 | 2904815   | 2912727   | 0.0489984 | chr11:00290 | 0.0489984 |
| ANKRD43  | 4505 chr5  | 132171791 | 132180278 | 0.049005  | chr5:132171 | 0.049005  |
| SLC4A10  | 4508 chr2  | 162183967 | 162191715 | 0.0490283 | chr2:162190 | 0.0490283 |
| C1QL3    | 4528 chr10 | 16600702  | 16609463  | 0.049141  | chr10:01660 | 0.049141  |

|          |      |       |           |           |           |            |           |
|----------|------|-------|-----------|-----------|-----------|------------|-----------|
| PCNX     | 4531 | chr14 | 70438893  | 70446226  | 0.0491584 | chr14:0704 | 0.0491584 |
| NDUFB2   | 4534 | chr7  | 140041577 | 140045505 | 0.0491622 | chr7:14004 | 0.0491622 |
| PMM2     | 4539 | chr16 | 8799188   | 8804256   | 0.0491818 | chr16:0087 | 0.0491818 |
| ZFYVE27  | 4546 | chr10 | 99481616  | 99488839  | 0.049204  | chr10:0994 | 0.049204  |
| NASP     | 4556 | chr1  | 45820366  | 45824361  | 0.0492878 | chr1:04582 | 0.0492878 |
| IL4I1    | 4560 | chr19 | 55089433  | 55097079  | 0.0493063 | chr19:0550 | 0.0493063 |
| OVOL1    | 4562 | chr11 | 65311209  | 65313881  | 0.0493248 | chr11:0653 | 0.0493248 |
| C1orf118 | 4564 | chr1  | 78126102  | 78132631  | 0.0493277 | chr1:07812 | 0.0493277 |
| BTBD6    | 4574 | chr14 | 104786093 | 104788201 | 0.0493626 | chr14:1047 | 0.0493626 |
| ACRBP    | 4575 | chr12 | 6617493   | 6627761   | 0.0493669 | chr12:0066 | 0.0493669 |
| MYH9     | 4577 | chr22 | 35073394  | 35118120  | 0.0493722 | chr22:0351 | 0.0493722 |
| B3GAT2   | 4579 | chr6  | 71720402  | 71728904  | 0.0493945 | chr6:07172 | 0.0493945 |
| DSCR9    | 4582 | chr21 | 37497423  | 37515952  | 0.0494239 | chr21:0375 | 0.0494239 |
| ADORA1   | 4597 | chr1  | 201359184 | 201366620 | 0.0495128 | chr1:20136 | 0.0495128 |
| CKAP2    | 4605 | chr13 | 51927630  | 51929659  | 0.0495588 | chr13:0519 | 0.0495588 |
| INPP4A   | 4608 | chr2  | 98425813  | 98430330  | 0.0495672 | chr2:09842 | 0.0495672 |
| FAM105B  | 4609 | chr5  | 14717182  | 14734239  | 0.0495698 | chr5:01471 | 0.0495698 |
| TMED8    | 4618 | chr14 | 76908288  | 76913102  | 0.0496137 | chr14:0769 | 0.0496137 |
| FBLN5    | 4619 | chr14 | 91481526  | 91489182  | 0.049622  | chr14:0914 | 0.049622  |
| PTPN2    | 4626 | chr18 | 12871911  | 12879677  | 0.0496417 | chr18:0128 | 0.0496417 |
| TFPI2    | 4631 | chr7  | 93355413  | 93363449  | 0.0496588 | chr7:09335 | 0.0496588 |
| HLA-E    | 4640 | chr6  | 30560371  | 30566828  | 0.0497189 | chr6:03056 | 0.0497189 |
| SLCO4C1  | 4645 | chr5  | 101658008 | 101663783 | 0.0497474 | chr5:10165 | 0.0497474 |
| RAB4A    | 4647 | chr1  | 227471026 | 227475822 | 0.0497528 | chr1:22747 | 0.0497528 |
| IGFALS   | 4650 | chr16 | 1781134   | 1785754   | 0.0497616 | chr16:0017 | 0.0497616 |
| MTMR2    | 4655 | chr11 | 95294252  | 95302471  | 0.0497993 | chr11:0952 | 0.0497993 |
| WDR79    | 4659 | chr17 | 7532506   | 7547569   | 0.0498156 | chr17:0075 | 0.0498156 |
| CIB1     | 4663 | chr15 | 88575609  | 88578181  | 0.0498365 | chr15:0885 | 0.0498365 |
| C15orf2  | 4665 | chr15 | 22467617  | 22474442  | 0.0498482 | chr15:0224 | 0.0498482 |
| CALCB    | 4667 | chr11 | 15048742  | 15054089  | 0.0498616 | chr11:0150 | 0.0498616 |
| EIF5B    | 4668 | chr2  | 99320266  | 99324407  | 0.0498645 | chr2:09932 | 0.0498645 |
| C9orf66  | 4671 | chr9  | 202976    | 211257    | 0.0498786 | chr9:00020 | 0.0498786 |
| PDE6G    | 4674 | chr17 | 77231630  | 77242392  | 0.0499122 | chr17:0772 | 0.0499122 |
| PRDM8    | 4678 | chr4  | 81321454  | 81327836  | 0.0499433 | chr4:08132 | 0.0499433 |
| MRPS26   | 4682 | chr20 | 2974372   | 2977142   | 0.049971  | chr20:0029 | 0.049971  |
| POPDC3   | 4687 | chr6  | 105714157 | 105737213 | 0.0499855 | chr6:10573 | 0.0499855 |

### HPSE- bound genes (3'-transcribe region)

### NS subset (1 gene)

| Gene     | Rank (Hep-I) | Chromosome | Start  | End    | Min P(Xbar) | Probe      | P(Xbar)  |
|----------|--------------|------------|--------|--------|-------------|------------|----------|
| C20orf55 | 4796         | chr20      | 759936 | 775960 | 0.042589    | chr20:0007 | 0.042589 |

### HPSE- bound genes (3'-transcribe region)

### NS and ST subset (27 genes)

| Gene        | Rank (Hep-I) | Chromosome | Start     | End       | Min P(Xbar) | Probe      | P(Xbar)   |
|-------------|--------------|------------|-----------|-----------|-------------|------------|-----------|
| PRKACG      | 230          | chr9       | 70816672  | 70823985  | 0.0219123   | chr9:07081 | 0.0219123 |
| CSF2        | 416          | chr5       | 131432127 | 131439910 | 0.0244134   | chr5:13143 | 0.0244134 |
| H1FX        | 457          | chr3       | 130514329 | 130517453 | 0.024832    | chr3:13051 | 0.024832  |
| MRPS2       | 585          | chr9       | 137532369 | 137538898 | 0.0262781   | chr9:13753 | 0.0262781 |
| SMPD2       | 745          | chr6       | 109868778 | 109871909 | 0.027653    | chr6:10987 | 0.027653  |
| SLC34A1     | 844          | chr5       | 176738736 | 176759024 | 0.0284824   | chr5:17675 | 0.0284824 |
| CLDN4       | 916          | chr7       | 72878316  | 72885889  | 0.0290512   | chr7:07288 | 0.0290512 |
| PFN3        | 970          | chr5       | 176759149 | 176761683 | 0.0295863   | chr5:17675 | 0.0295863 |
| U83         | 1077         | chr6       | 31603996  | 31616762  | 0.0303325   | chr6:03160 | 0.0303325 |
| LENEP       | 1247         | chr1       | 153232219 | 153243417 | 0.0314431   | chr1:15323 | 0.0314431 |
| GSH1        | 1279         | chr13      | 27259651  | 27267246  | 0.0316613   | chr13:0272 | 0.0316613 |
| hsa-mir-339 | 1627         | chr7       | 1026744   | 1034601   | 0.0340398   | chr7:00102 | 0.0340398 |
| MRPL36      | 1814         | chr5       | 1849656   | 1852905   | 0.035146    | chr5:00185 | 0.035146  |
| SCAMP2      | 1919         | chr15      | 72920147  | 72955954  | 0.0356812   | chr15:0729 | 0.0356812 |

|             |            |           |           |           |             |           |
|-------------|------------|-----------|-----------|-----------|-------------|-----------|
| C17orf68    | 2241 chr17 | 8065106   | 8092032   | 0.0374817 | chr17:00806 | 0.0374817 |
| IFITM1      | 2282 chr11 | 302284    | 306519    | 0.0376952 | chr11:00030 | 0.0376952 |
| hsa-mir-182 | 2529 chr7  | 129195256 | 129201533 | 0.0388747 | chr7:129196 | 0.0388747 |
| COMTD1      | 2686 chr10 | 76663241  | 76670399  | 0.0397659 | chr10:07666 | 0.0397659 |
| POU3F3      | 2864 chr2  | 104833131 | 104840817 | 0.0406207 | chr2:104840 | 0.0406207 |
| DNAJC18     | 3053 chr5  | 138765266 | 138808109 | 0.0415395 | chr5:138767 | 0.0415395 |
| PLAGL2      | 3353 chr20 | 30239362  | 30259110  | 0.0430839 | chr20:03024 | 0.0430839 |
| hsa-mir-150 | 3420 chr19 | 54695518  | 54697818  | 0.0434031 | chr19:05469 | 0.0434031 |
| hsa-mir-296 | 3488 chr20 | 56823849  | 56831559  | 0.0437326 | chr20:05682 | 0.0437326 |
| STRA13      | 4033 chr17 | 77569269  | 77574080  | 0.0466038 | chr17:07756 | 0.0466038 |
| C19orf23    | 4090 chr19 | 1215697   | 1224093   | 0.0468477 | chr19:00121 | 0.0468477 |
| hsa-mir-210 | 4405 chr11 | 556147    | 558141    | 0.0484899 | chr11:00055 | 0.0484899 |
| ANKRD9      | 4616 chr14 | 102041472 | 102051331 | 0.0496015 | chr14:10204 | 0.0496015 |

### HPSE- bound genes (3'-transcribe region)

### ST subset (6 genes)

| Gene     | Rank (Hep-2) | Chromosome | Start    | End      | Min P(Xbar) | Probe       | P(Xbar)   |
|----------|--------------|------------|----------|----------|-------------|-------------|-----------|
| B3GALT6  | 3435         | chr1       | 1157693  | 1162786  | 0.0434682   | chr1:001160 | 0.0434682 |
| IFNA5    | 3461         | chr9       | 21293176 | 21300727 | 0.043596    | chr9:021294 | 0.043596  |
| POU3F4   | 3606         | chrX       | 82644494 | 82652390 | 0.0443684   | chrX:082655 | 0.0443684 |
| ZNF524   | 3611         | chr19      | 60803651 | 60808110 | 0.0443871   | chr19:06080 | 0.0443871 |
| NUDT16L1 | 3981         | chr16      | 4681176  | 4686190  | 0.0463318   | chr16:00468 | 0.0463318 |
| AVP      | 4237         | chr20      | 3011034  | 3016978  | 0.0476023   | chr20:00301 | 0.0476023 |

| Normalized I | Normalized I | Type              | transcript int | Normalized I | Normalized I | Rank (P2-NS_R1R2) |
|--------------|--------------|-------------------|----------------|--------------|--------------|-------------------|
| 1.6946661    | 3.2370196    | PROMOTER          | 349.1784       |              |              |                   |
| 2.0455458    | 4.12829424   | PROMOTER          | 931.9619       | 2.3510373    | 5.10190947   | 453               |
| 1.5985998    | 3.02849242   | PROMOTER          | 102.4286       | 1.5807912    | 2.99133855   | 3664              |
| 1.6431262    | 3.12341918   | PROMOTER          |                | 1.4916544    | 2.81211267   | 1946              |
| 1.6007885    | 3.03309041   | PROMOTER          | 477.5922       | 2.18063      | 4.53351482   | 44                |
| 1.9508412    | 3.86599883   | PROMOTER          |                | 2.1356945    | 4.39448621   | 403               |
| 1.960222     | 3.89121852   | PROMOTER          |                | 2.2489474    | 4.75335911   | 4646              |
| 1.7478212    | 3.35850971   | PROMOTER          |                |              |              |                   |
| 1.5877273    | 3.00575475   | PROMOTER          | 2981.618       |              |              |                   |
| 1.6824327    | 3.20968719   | PROMOTER          |                | 1.6864398    | 3.21861452   | 4138              |
| 1.6899939    | 3.22655339   | PROMOTER          |                |              |              |                   |
| 1.806977     | 3.49908328   | PROMOTER          | 192.2641       | 1.7508575    | 3.36558548   | 2029              |
| 1.6733087    | 3.18945229   | PROMOTER          | 955.4666       | 1.5921743    | 3.01503406   | 5149              |
| 1.6078209    | 3.04791126   | PROMOTER          |                | 1.427658     | 2.69009664   | 333               |
| 1.7093471    | 3.27012798   | PROMOTER          |                | 1.7664446    | 3.40214493   | 3652              |
| 1.6172404    | 3.06787648   | PROMOTER          | 504.4035       | 1.7010162    | 3.25129892   | 132               |
| 1.6945639    | 3.2367903    | PROMOTER          | 619.0972       | 1.8440356    | 3.59012879   | 335               |
| 1.8962046    | 3.72232649   | PROMOTER          | 1887.499       | 1.896014     | 3.72183475   | 436               |
| 1.7743663    | 3.42087716   | PROMOTER          | 221.7472       |              |              |                   |
| 1.7912664    | 3.46118583   | PROMOTER          | 250.6388       | 1.5111104    | 2.85029333   | 2397              |
| 2.0833395    | 4.23787049   | PROMOTER          | 646.2028       | 2.0286946    | 4.08035479   | 1259              |
| 1.5986325    | 3.02856106   | DIVERGENT_PROMOTI |                | 2.2037764    | 4.60683651   | 3865              |
| 1.837827     | 3.57471196   | PROMOTER          | 468.7692       |              |              |                   |
| 1.6853172    | 3.216111     | PROMOTER          |                | 1.153844     | 2.22505963   | 5331              |
| 1.5962083    | 3.02347636   | PROMOTER          | 141.1145       |              |              |                   |
| 1.7209972    | 3.29664194   | PROMOTER          | 101.0022       | 1.735053     | 3.32891723   | 4046              |
| 1.624652     | 3.08367773   | PROMOTER          |                | 2.229702     | 4.69037086   | 3203              |
| 1.6718808    | 3.18629711   | PROMOTER          | 531.2459       | 1.7678       | 3.40534272   | 911               |
| 1.870776     | 3.65729246   | PROMOTER          | 290.1844       |              |              |                   |
| 1.8226057    | 3.53719487   | PROMOTER          | 152.1383       | 1.087919     | 2.125672     | 5986              |
| 1.7518294    | 3.36785354   | PROMOTER          | 304.9474       | 0.93507755   | 1.91199341   | 4736              |
| 1.7914807    | 3.46169999   | PROMOTER          |                | 1.9507732    | 3.86581661   | 4220              |
| 1.641076     | 3.11898367   | PROMOTER          |                | 1.5661501    | 2.96113466   | 5191              |
| 2.0271864    | 4.07609139   | PROMOTER          | 976.2021       | 1.2476641    | 2.3745664    | 356               |
| 1.7613813    | 3.39022565   | PROMOTER          | 392.7919       | 1.5753615    | 2.98010156   | 5237              |
| 1.8816087    | 3.68485717   | PROMOTER          | 180.688        |              |              |                   |
| 1.6013572    | 3.03428626   | PROMOTER          | 212.4596       | 2.022684     | 4.06339045   | 2301              |
| 1.8259119    | 3.54531029   | PROMOTER          |                |              |              |                   |
| 1.5939357    | 3.01871739   | PROMOTER          | 11049.93       | 1.7809942    | 3.4366292    | 3813              |
| 1.6597928    | 3.15971142   | PROMOTER          | 107.8632       | 1.2155949    | 2.32236527   | 3186              |
| 1.6022013    | 3.0360621    | PROMOTER          | 343.8329       | 0.9931815    | 1.99056985   | 1847              |
| 1.8096899    | 3.50566928   | DIVERGENT_PROMOTI |                | 0.89160764   | 1.85524233   | 4078              |
| 2.205326     | 4.61178738   | PROMOTER          | 196.2928       | 1.4165976    | 2.6695519    | 4849              |
| 1.7898233    | 3.4577254    | DIVERGENT_PROMOTI |                | 1.2690129    | 2.40996618   | 2088              |
| 1.7096217    | 3.27075047   | PROMOTER          | 1532.474       | 1.3223574    | 2.50074404   | 2252              |
| 1.7625412    | 3.39295242   | PROMOTER          | 1320.521       | 1.9555236    | 3.87856667   | 1353              |
| 1.7167363    | 3.2869199    | PROMOTER          |                | 2.0177205    | 4.04943464   | 2847              |
| 1.6104373    | 3.05344382   | PROMOTER          | 254.1528       |              |              |                   |
| 1.7465773    | 3.35561523   | PROMOTER          | 165.0192       | 2.277281     | 4.84763474   | 2138              |
| 1.7264397    | 3.30910186   | PROMOTER          | 1146.613       |              |              |                   |
| 1.6268333    | 3.08834366   | DIVERGENT_PROMOTI |                | 1.4164749    | 2.66932487   | 2590              |
| 1.6913123    | 3.22950331   | DIVERGENT_PROMOTI |                | 2.1887374    | 4.55906317   | 5794              |
| 1.6216697    | 3.07730982   | PROMOTER          | 116.6261       | 1.4374722    | 2.7084589    | 6217              |
| 1.7050593    | 3.26042334   | PROMOTER          | 195.9528       | 0.9130657    | 1.88304268   | 5839              |
| 1.6292021    | 3.09341866   | PROMOTER          | 307.0241       | 1.506172     | 2.84055335   | 4248              |

|           |            |                    |          |           |            |  |      |
|-----------|------------|--------------------|----------|-----------|------------|--|------|
| 1.9712881 | 3.92118063 | PROMOTER           | 427.0619 |           |            |  |      |
| 1.6374259 | 3.11110244 | PROMOTER           | 343.6555 |           |            |  |      |
| 1.5904144 | 3.01135835 | PROMOTER           | 1368.956 | 1.4862663 | 2.80162973 |  | 4177 |
| 1.637516  | 3.11129674 | PROMOTER           | 436.7325 | 1.8853652 | 3.69446433 |  | 3590 |
| 1.9360845 | 3.82665676 | DIVERGENT_PROMOTEI |          | 2.4028814 | 5.28858364 |  | 2149 |
| 1.6139565 | 3.06090125 | PROMOTER           | 151.4697 |           |            |  |      |
| 1.9182503 | 3.77964386 | PROMOTER           |          |           |            |  |      |
| 1.6901294 | 3.22685645 | DIVERGENT_PROMOTER |          |           |            |  |      |
| 1.6589174 | 3.15779475 | PROMOTER           | 516.0404 | 1.705497  | 3.26141267 |  | 533  |
| 1.7141278 | 3.28098228 | PROMOTER           | 166.8988 |           |            |  |      |
| 1.6181657 | 3.06984476 | PROMOTER           |          |           |            |  |      |
| 1.7599277 | 3.38681152 | PROMOTER           |          | 1.9840357 | 3.95598156 |  | 855  |
| 1.6503581 | 3.13911547 | PROMOTER           |          |           |            |  |      |
| 1.8347766 | 3.56716166 | PROMOTER           | 312.4221 | 0.7349208 | 1.6643061  |  | 3593 |
| 1.6473029 | 3.13247479 | PROMOTER           | 899.4793 | 1.3600994 | 2.56702865 |  | 2946 |
| 1.9766387 | 3.93575032 | PROMOTER           | 2112.34  |           |            |  |      |
| 1.6802591 | 3.20485503 | PROMOTER           |          | 1.3990449 | 2.63726931 |  | 6090 |

mes)

| Normalized | Normalized | Type             | transcript in | Normalized | Normalized | Rank (P2-12H_R1R2) |
|------------|------------|------------------|---------------|------------|------------|--------------------|
| 3.2446012  | 9.4781218  | PROMOTEI         | 372.4899      | 2.244804   | 4.7397271  | 368                |
| 2.24925    | 4.7543562  | PROMOTEI         | 147.2939      | 1.7255064  | 3.3069618  | 304                |
| 2.0089388  | 4.0248606  | PROMOTER         |               | 1.8470445  | 3.5976242  | 1821               |
| 2.1724944  | 4.5080215  | PROMOTER         |               | 1.901363   | 3.7356596  | 607                |
| 2.627991   | 6.1816458  | PROMOTEI         | 100.2909      | 1.7741791  | 3.4204333  | 2137               |
| 2.116326   | 4.3358835  | PROMOTEI         | 805.6806      | 2.1911242  | 4.5666119  | 95                 |
| 2.4647837  | 5.5204417  | PROMOTEI         | 674.3422      | 1.5212623  | 2.8704209  | 916                |
| 2.11264    | 4.3248197  | PROMOTEI         | 509.4315      | 1.6530952  | 3.1450767  | 634                |
| 2.6951475  | 6.4761998  | PROMOTER         |               | 2.2038252  | 4.6069923  | 625                |
| 3.7420719  | 13.380609  | PROMOTEI         | 1042.168      | 2.1819804  | 4.5377603  | 423                |
| 2.6443691  | 6.2522224  | PROMOTER         |               | 1.9254575  | 3.7985729  | 149                |
| 2.3601732  | 5.1343199  | DIVERGENT_PROMOT |               | 1.9217023  | 3.7886984  | 507                |
| 2.340503   | 5.0647919  | PROMOTEI         | 104.7124      | 1.7331454  | 3.3245185  | 3440               |
| 2.3715134  | 5.1748369  | PROMOTEI         | 179.0851      | 1.9026538  | 3.7390034  | 618                |
| 2.313937   | 4.9723815  | PROMOTER         |               | 2.0388584  | 4.1092024  | 565                |
| 2.7114604  | 6.5498433  | PROMOTEI         | 1387.445      | 1.9261808  | 3.8004778  | 2500               |
| 2.0403912  | 4.1135706  | PROMOTER         |               | 1.9240566  | 3.7948861  | 1068               |
| 2.6251104  | 6.1693154  | PROMOTEI         | 497.4486      | 1.81663    | 3.522574   | 338                |
| 2.4132771  | 5.3268295  | PROMOTEI         | 512.6608      | 1.8658172  | 3.6447433  | 1049               |
| 2.2644248  | 4.8046282  | PROMOTEI         | 1293.835      | 1.8263656  | 3.5464254  | 3118               |
| 2.2597637  | 4.7891303  | PROMOTEI         | 495.9976      |            |            |                    |
| 2.2199736  | 4.6588491  | PROMOTER         |               | 1.2889713  | 2.4435376  | 3603               |
| 2.4043584  | 5.2940008  | PROMOTEI         | 146.3796      | 1.945968   | 3.8529621  | 1553               |
| 2.541332   | 5.8212622  | PROMOTER         |               | 2.3342626  | 5.0429314  | 435                |
| 2.6727724  | 6.3765338  | PROMOTEI         | 295.4451      | 2.851236   | 7.2161834  | 209                |
| 3.047422   | 8.267333   | PROMOTER         |               | 1.7252098  | 3.306282   | 5482               |
| 2.372312   | 5.1777022  | PROMOTER         |               | 1.6168283  | 3.0670003  | 587                |
| 2.017411   | 4.048566   | PROMOTEI         | 114.5603      | 1.6012695  | 3.0341018  | 3227               |
| 1.8056784  | 3.4959351  | PROMOTEI         | 169.6603      | 1.662888   | 3.1664976  | 325                |
| 2.7167711  | 6.5739984  | PROMOTEI         | 323.284       | 1.8312038  | 3.5583386  | 1654               |
| 2.4373403  | 5.4164226  | PROMOTEI         | 743.0607      | 1.8135802  | 3.5151352  | 1136               |
| 1.9889077  | 3.9693635  | PROMOTER         |               | 2.3176744  | 4.9852795  | 100                |
| 2.2393265  | 4.7217658  | PROMOTEI         | 207.7432      | 1.752988   | 3.3705593  | 849                |
| 2.0224416  | 4.0627078  | PROMOTEI         | 291.2479      | 1.8284483  | 3.5515488  | 246                |
| 1.9285192  | 3.8066428  | PROMOTEI         | 386.0517      | 1.8607962  | 3.6320806  | 1123               |
| 2.0182962  | 4.0510509  | PROMOTER         |               | 2.4357758  | 5.410552   | 543                |
| 1.6594065  | 3.1588655  | PROMOTEI         | 554.6144      | 1.4150869  | 2.666758   | 2295               |

|           |           |                  |          |           |           |      |
|-----------|-----------|------------------|----------|-----------|-----------|------|
| 3.075324  | 8.428781  | PROMOTEI         | 562.1805 | 2.332065  | 5.0352556 | 546  |
| 2.3359962 | 5.0489948 | PROMOTER         |          | 1.8140274 | 3.516225  | 1410 |
| 2.6158063 | 6.1296568 | PROMOTEI         | 131.6599 | 2.1228356 | 4.3554917 | 2292 |
| 1.8644327 | 3.6412472 | PROMOTER         |          | 1.6345619 | 3.1049325 | 1229 |
| 2.315633  | 4.9782304 | PROMOTEI         | 603.39   | 1.1742498 | 2.256755  | 5270 |
| 1.934772  | 3.823177  | PROMOTER         |          | 1.64766   | 3.1332502 | 509  |
| 1.9794965 | 3.9435543 | PROMOTEI         | 146.997  | 2.047102  | 4.1327497 | 1020 |
| 2.4265373 | 5.3760155 | PROMOTEI         | 1602.095 | 2.0291908 | 4.0817584 | 448  |
| 2.3336878 | 5.0409226 | PROMOTER         |          | 1.9404097 | 3.8381463 | 238  |
| 2.097031  | 4.2782803 | PROMOTEI         | 500.6469 | 1.8079165 | 3.5013627 | 343  |
| 1.8301169 | 3.5556588 | DIVERGENT_PROMOT |          | 1.5244334 | 2.8767371 | 4190 |
| 2.1909518 | 4.5660663 | PROMOTEI         | 198.9119 | 1.9167603 | 3.7757423 | 1085 |
| 2.0300522 | 4.0841963 | PROMOTER         |          | 2.06461   | 4.1832088 | 892  |
| 2.3713174 | 5.1741339 | DIVERGENT_PROMOT |          | 2.0627394 | 4.1777883 | 404  |
| 1.8803082 | 3.681537  | PROMOTER         |          | 1.751397  | 3.3668443 | 3801 |
| 2.558505  | 5.8909692 | PROMOTEI         | 3983.539 | 1.7049142 | 3.2600954 | 600  |
| 2.2193787 | 4.6569284 | PROMOTER         |          | 1.5229189 | 2.8737188 | 941  |
| 1.9163419 | 3.7746474 | PROMOTER         |          | 2.340314  | 5.0641285 | 323  |
| 1.9649805 | 3.9040743 | PROMOTER         |          | 1.8373712 | 3.5735828 | 1361 |
| 2.0247102 | 4.0691013 | PROMOTER         |          | 1.2001958 | 2.2977085 | 2963 |
| 2.9380183 | 7.663579  | PROMOTER         |          | 2.2374718 | 4.7156995 | 1324 |
| 2.4561818 | 5.4876246 | PROMOTEI         | 756.826  | 1.4408864 | 2.7148762 | 469  |
| 2.2896063 | 4.8892267 | PROMOTER         |          | 1.9785426 | 3.9409477 | 900  |
| 2.144018  | 4.4199131 | PROMOTEI         | 277.3046 | 1.5687383 | 2.9664517 | 3589 |
| 2.1206827 | 4.348997  | PROMOTEI         | 263.4749 | 2.0687768 | 4.1953082 | 789  |
| 2.4987078 | 5.6517898 | PROMOTER         |          | 1.7244707 | 3.3045887 | 1076 |
| 2.004055  | 4.0112587 | PROMOTER         |          | 1.5622185 | 2.953076  | 511  |
| 2.5504315 | 5.8580946 | PROMOTEI         | 130.9934 | 2.1653726 | 4.4858227 | 189  |
| 2.28037   | 4.8580253 | PROMOTEI         | 198.5816 | 2.5902731 | 6.0221269 | 175  |
| 2.2343612 | 4.705543  | PROMOTER         |          | 1.8702948 | 3.6560728 | 2075 |
| 2.3733118 | 5.1812917 | PROMOTEI         | 328.9762 | 1.5672139 | 2.9633189 | 418  |
| 2.3550174 | 5.116004  | DIVERGENT_PROMOT |          | 2.599225  | 6.0596102 | 13   |
| 2.5058062 | 5.6796664 | PROMOTER         |          | 1.9148661 | 3.7707882 | 473  |
| 1.7131184 | 3.2786875 | PROMOTEI         | 1178.008 | 1.7630281 | 3.3940977 | 2557 |
| 1.9767227 | 3.9359795 | PROMOTEI         | 235.1872 | 1.4570664 | 2.7454952 | 3151 |
| 2.167831  | 4.4934732 | PROMOTEI         | 180.927  | 2.015335  | 4.0427444 | 1513 |
| 2.7581565 | 6.7653121 | PROMOTER         |          |           |           |      |
| 2.062929  | 4.1783374 | PROMOTER         |          | 1.8328574 | 3.5624195 | 1353 |
| 2.0110896 | 4.0308654 | PROMOTER         |          | 1.5392938 | 2.9065219 | 1155 |
| 2.9771042 | 7.8740409 | PROMOTER         |          | 2.0089793 | 4.0249735 | 956  |
| 2.12894   | 4.3739599 | PROMOTER         |          | 1.3025734 | 2.4666848 | 1871 |
| 2.9035594 | 7.4827024 | PROMOTEI         | 149.0201 | 1.7166988 | 3.2868345 | 2068 |
| 1.7904893 | 3.459322  | PROMOTER         |          | 1.4379878 | 2.709427  | 780  |
| 2.1271434 | 4.3685164 | PROMOTER         |          |           |           |      |
| 2.5091271 | 5.6927553 | PROMOTER         |          | 1.5184153 | 2.864762  | 802  |
| 2.0984795 | 4.2825779 | PROMOTEI         | 216.3963 | 1.6603135 | 3.160852  | 308  |
| 2.6746807 | 6.3849738 | PROMOTEI         | 264.097  | 1.6186844 | 3.0709487 | 4451 |
| 2.0836737 | 4.2388523 | PROMOTER         |          | 2.0212474 | 4.0593462 | 415  |
| 2.215818  | 4.6454489 | DIVERGENT_PROMOT |          | 1.8653946 | 3.6436758 | 879  |
| 2.254612  | 4.7720594 | PROMOTER         |          | 1.4295784 | 2.6936799 | 5324 |
| 1.9549575 | 3.8770451 | DIVERGENT_PROMOT |          | 1.3830311 | 2.6081577 | 2175 |
| 2.3203259 | 4.9944503 | PROMOTER         |          | 1.8196267 | 3.5298985 | 2057 |
| 2.5040348 | 5.672697  | DIVERGENT_PROMOT |          | 2.2830372 | 4.8670149 | 3449 |
| 2.1560745 | 4.4570048 | PROMOTEI         | 268.3294 | 1.561164  | 2.9509183 | 1545 |
| 2.1685083 | 4.4955832 | PROMOTEI         | 1447.156 | 1.5275209 | 2.8829002 | 1250 |
| 2.3027368 | 4.9339285 | PROMOTER         |          | 1.4705979 | 2.7713672 | 2111 |
| 2.4377832 | 5.4180856 | PROMOTEI         | 139.5905 | 2.0581732 | 4.1645863 | 4307 |
| 1.6482673 | 3.1345695 | PROMOTER         |          | 1.5088869 | 2.8459038 | 4884 |

|           |           |                  |          |           |           |      |
|-----------|-----------|------------------|----------|-----------|-----------|------|
| 2.1807196 | 4.5337964 | PROMOTEI         | 219.8032 | 1.4572767 | 2.7458955 | 2692 |
| 1.9251148 | 3.7976707 | PROMOTER         |          | 1.5962154 | 3.0234912 | 1500 |
| 1.7435778 | 3.3486458 | PROMOTEI         | 108.5363 | 1.3703412 | 2.585317  | 2460 |
| 2.6059072 | 6.0877419 | PROMOTER         |          | 1.505103  | 2.8384494 | 1854 |
| 2.0897396 | 4.2567123 | PROMOTER         |          |           |           |      |
| 2.3078513 | 4.9514508 | PROMOTER         |          | 2.1102211 | 4.3175746 | 245  |
| 1.7593672 | 3.385496  | PROMOTEI         | 2013.779 | 2.7928522 | 6.9299849 | 617  |
| 1.7155311 | 3.2841752 | PROMOTEI         | 1216.541 | 1.2991444 | 2.460829  | 2750 |
| 1.8516117 | 3.6090314 | PROMOTEI         | 122.4018 | 1.8809965 | 3.6832939 | 2443 |
| 2.0759022 | 4.2160799 | PROMOTER         |          | 1.9013746 | 3.7356896 | 5599 |
| 2.4989908 | 5.6528985 | PROMOTEI         | 620.1183 |           |           |      |
| 2.1089764 | 4.3138512 | PROMOTER         |          | 1.6515763 | 3.1417672 | 2889 |
| 2.1461396 | 4.4264177 | PROMOTEI         | 226.9891 | 1.6084273 | 3.0491926 | 1869 |
| 1.8145854 | 3.5175853 | PROMOTER         |          | 2.0383987 | 4.1078933 | 177  |
| 2.095512  | 4.2737781 | PROMOTEI         | 652.0862 | 2.0779927 | 4.2221935 | 3769 |
| 2.3283575 | 5.0223323 | PROMOTEI         | 268.2301 | 2.3014767 | 4.9296209 | 647  |
| 1.8926837 | 3.7132532 | PROMOTEI         | 898.3925 |           |           |      |
| 2.3978431 | 5.2701466 | PROMOTEI         | 181.4809 | 1.8534158 | 3.6135474 | 611  |
| 2.0894089 | 4.2557367 | PROMOTEI         | 127.4161 | 1.6768227 | 3.1972304 | 3781 |
| 1.8432889 | 3.5882711 | PROMOTEI         | 382.6966 | 2.3941476 | 5.2566643 | 1603 |
| 2.2612133 | 4.7939448 | PROMOTER         |          |           |           |      |
| 2.2004645 | 4.596273  | PROMOTEI         | 782.634  | 1.8335243 | 3.5640666 | 1335 |
| 2.0920913 | 4.2636568 | DIVERGENT_PROMOT |          | 1.0952482 | 2.1364983 | 592  |
| 2.0556312 | 4.1572549 | PROMOTER         |          | 1.5491154 | 2.9263765 | 3019 |
| 2.158249  | 4.4637276 | PROMOTEI         | 5441.286 | 1.8526706 | 3.6116813 | 1109 |
| 1.8657433 | 3.6445566 | DIVERGENT_PROMOT |          | 1.6151568 | 3.0634489 | 334  |
| 1.8609796 | 3.6325423 | PROMOTEI         | 152.4173 | 1.6143249 | 3.061683  | 3667 |
| 2.2020397 | 4.6012942 | PROMOTEI         | 197.5539 | 2.2084715 | 4.6218534 | 1226 |
| 2.2298064 | 4.6907103 | PROMOTEI         | 2357.48  | 1.6870657 | 3.2200112 | 1379 |
| 2.0175018 | 4.0488208 | PROMOTER         |          | 1.5416718 | 2.9113167 | 1111 |
| 2.179142  | 4.5288413 | PROMOTEI         | 138.86   | 1.6618974 | 3.1643242 | 928  |
| 2.4822032 | 5.5875011 | DIVERGENT_PROMOT |          | 2.1701572 | 4.5007243 | 1419 |
| 2.065787  | 4.186623  | PROMOTEI         | 416.6731 | 2.0406296 | 4.1142504 | 141  |
| 1.6245322 | 3.0834217 | PROMOTER         |          | 1.9972374 | 3.9923478 | 706  |
| 1.6648673 | 3.1708449 | PROMOTEI         | 4901.149 | 1.421155  | 2.6779982 | 3083 |
| 2.2875288 | 4.8821912 | PROMOTER         |          | 1.9588695 | 3.8875723 | 223  |
| 2.5166318 | 5.7224454 | PROMOTEI         | 472.0648 | 1.7200383 | 3.2944515 | 948  |
| 2.817624  | 7.0500036 | PROMOTER         |          | 1.6884221 | 3.22304   | 4024 |
| 2.3619335 | 5.1405884 | PROMOTER         |          | 1.6497023 | 3.1376889 | 1646 |
| 2.0261106 | 4.073053  | PROMOTER         |          | 1.4786249 | 2.7868298 | 2329 |
| 1.9391104 | 3.8346912 | PROMOTEI         | 3583.389 | 1.994715  | 3.9853737 | 450  |
| 2.179365  | 4.5295414 | PROMOTEI         | 1696.766 | 1.935549  | 3.8252366 | 500  |
| 2.07827   | 4.2230051 | PROMOTER         |          | 1.44186   | 2.7167089 | 2803 |
| 2.537942  | 5.8075996 | PROMOTEI         | 973.8746 | 2.0070424 | 4.0195734 | 539  |
| 2.1702523 | 4.501021  | PROMOTEI         | 1149.92  | 1.3778803 | 2.5988625 | 2223 |
| 2.1258173 | 4.3645028 | PROMOTER         |          | 1.5533968 | 2.9350738 | 1480 |
| 2.2497253 | 4.7559228 | PROMOTEI         | 2935.546 | 2.247176  | 4.7475263 | 1279 |
| 1.9066759 | 3.749442  | PROMOTEI         | 444.7851 | 1.948182  | 3.8588795 | 2378 |
| 2.02206   | 4.0616333 | PROMOTEI         | 113.6103 | 1.9020437 | 3.7374226 | 1608 |
| 1.8931478 | 3.7144479 | PROMOTEI         | 376.6185 | 1.2265995 | 2.3401476 | 3000 |
| 2.509885  | 5.6957467 | PROMOTER         |          | 2.0836833 | 4.2388805 | 897  |
| 1.935264  | 3.8244811 | PROMOTER         |          |           |           |      |
| 2.186145  | 4.5508783 | PROMOTEI         | 173.4413 | 2.0051248 | 4.0142342 | 551  |
| 2.077637  | 4.2211526 | PROMOTEI         | 176.4863 | 1.4758872 | 2.7815465 | 2983 |
| 1.8575015 | 3.6237954 | PROMOTEI         | 301.5748 | 1.2759472 | 2.4215775 | 3891 |
| 2.2892432 | 4.8879963 | PROMOTEI         | 501.6616 | 2.256691  | 4.7789411 | 1808 |
| 2.5398488 | 5.8152806 | PROMOTEI         | 333.4167 | 2.1551757 | 4.4542289 | 1385 |
| 2.2367632 | 4.7133839 | PROMOTEI         | 288.243  | 2.0062385 | 4.0173342 | 1342 |



|           |           |                  |          |           |           |      |
|-----------|-----------|------------------|----------|-----------|-----------|------|
| 2.0903842 | 4.2586147 | PROMOTEI         | 369.0286 | 1.9576155 | 3.8841946 | 957  |
| 1.8917494 | 3.7108493 | PROMOTEI         | 1640.692 | 1.622651  | 3.0794037 | 1675 |
| 2.531921  | 5.7834125 | PROMOTEI         | 181.9257 |           |           |      |
| 1.7297696 | 3.3167485 | PROMOTEI         | 1344.734 | 1.9433007 | 3.8458452 | 1908 |
| 1.669031  | 3.1800093 | PROMOTER         |          | 2.2774093 | 4.8480659 | 1907 |
| 1.8625445 | 3.6364847 | PROMOTER         |          | 1.5386674 | 2.9052602 | 4041 |
| 1.5940393 | 3.0189342 | PROMOTER         |          | 1.2959498 | 2.4553859 | 3073 |
| 2.4109392 | 5.3182043 | DIVERGENT_PROMOT |          | 1.8477376 | 3.599353  | 1394 |
| 1.9929488 | 3.9804976 | PROMOTEI         | 1211.076 | 1.459852  | 2.7508014 | 4089 |
| 2.2678556 | 4.8160675 | PROMOTER         |          | 1.5069968 | 2.8421778 | 2313 |
| 2.06791   | 4.1927883 | PROMOTER         |          |           |           |      |
| 2.0290098 | 4.0812464 | PROMOTEI         | 256.9486 | 1.3205358 | 2.4975885 | 2130 |
| 2.3128235 | 4.9685452 | PROMOTEI         | 125.1904 | 1.6497856 | 3.13787   | 4539 |
| 2.6898832 | 6.4526117 | DIVERGENT_PROMOT |          | 1.6356105 | 3.1071901 | 3271 |
| 1.716708  | 3.2868554 | PROMOTEI         | 1658.48  | 1.6515857 | 3.1417877 | 264  |
| 1.9051644 | 3.7455158 | PROMOTER         |          | 1.984203  | 3.9564403 | 192  |
| 2.630941  | 6.1942989 | PROMOTEI         | 163.6773 | 1.8508232 | 3.6070594 | 3605 |
| 2.1192303 | 4.3446209 | PROMOTEI         | 244.8761 | 1.4351203 | 2.7040471 | 1626 |
| 2.0775888 | 4.2210116 | PROMOTER         |          | 2.2191951 | 4.6563358 | 947  |
| 2.4880712 | 5.6102739 | DIVERGENT_PROMOT |          | 1.6466799 | 3.1311224 | 4172 |
| 2.2685344 | 4.818334  | DIVERGENT_PROMOT |          | 1.8237758 | 3.5400649 | 838  |
| 2.1902237 | 4.5637625 | PROMOTEI         | 223.2497 |           |           |      |
| 2.4515707 | 5.4701132 | PROMOTEI         | 707.7473 | 1.654506  | 3.1481537 | 1636 |
| 2.1752348 | 4.5165926 | PROMOTEI         | 989.2037 | 1.7827308 | 3.4407684 | 1549 |
| 2.344139  | 5.0775727 | PROMOTER         |          | 1.7567878 | 3.3794484 | 3537 |
| 2.2135723 | 4.6382234 | PROMOTEI         | 459.26   | 1.7680347 | 3.4058967 | 3136 |
| 2.4809585 | 5.5826825 | PROMOTER         |          | 1.6482974 | 3.1346349 | 3124 |
| 2.1881933 | 4.5573441 | PROMOTEI         | 966.6719 | 1.7845759 | 3.4451717 | 554  |
| 1.6025627 | 3.0368227 | PROMOTEI         | 144.1038 | 1.4121169 | 2.6612737 | 2496 |
| 2.4628444 | 5.513026  | PROMOTEI         | 372.3988 | 1.6172857 | 3.0679728 | 3766 |
| 1.6912768 | 3.2294238 | PROMOTER         |          | 1.9342188 | 3.8217113 | 3159 |
| 1.756663  | 3.3791561 | DIVERGENT_PROMOT |          | 1.6184629 | 3.0704772 | 1518 |
| 2.3683653 | 5.1635572 | DIVERGENT_PROMOT |          | 1.8906579 | 3.7080428 | 3757 |
| 2.5473375 | 5.8455448 | PROMOTER         |          | 1.3419669 | 2.5349669 | 2751 |
| 2.5932317 | 6.0344894 | PROMOTEI         | 201.818  | 1.6091444 | 3.0507086 | 4940 |
| 2.2709188 | 4.826304  | PROMOTEI         | 181.8903 | 1.8555028 | 3.6187785 | 2236 |
| 2.272556  | 4.8317841 | PROMOTEI         | 238.726  | 1.742721  | 3.3466577 | 402  |
| 1.6955928 | 3.2390995 | PROMOTEI         | 166.3498 | 1.8544827 | 3.6162206 | 508  |
| 2.3870065 | 5.230709  | PROMOTEI         | 120.4323 | 2.0158143 | 4.0440877 | 844  |
| 2.1371894 | 4.3990421 | PROMOTEI         | 321.658  | 1.648637  | 3.1353728 | 4081 |
| 2.0525794 | 4.1484701 | PROMOTEI         | 189.3149 | 1.829316  | 3.5536855 | 636  |
| 2.0874677 | 4.2500143 | PROMOTER         |          | 1.7744666 | 3.421115  | 1023 |
| 2.1267617 | 4.3673607 | PROMOTER         |          | 1.0631249 | 2.0894524 | 2448 |
| 2.0888615 | 4.2541223 | PROMOTEI         | 552.0788 | 1.6913029 | 3.2294823 | 560  |
| 1.804018  | 3.4919139 | PROMOTEI         | 292.4643 | 1.3964494 | 2.632529  | 2531 |
| 2.0570822 | 4.1614382 | PROMOTEI         | 261.6558 | 2.1223013 | 4.353879  | 790  |
| 1.665129  | 3.1714201 | PROMOTEI         | 166.8786 | 1.177756  | 2.2622463 | 4936 |
| 1.779433  | 3.4329123 | PROMOTER         |          |           |           |      |
| 1.7729421 | 3.4175018 | PROMOTEI         | 1114.894 | 1.4076294 | 2.6530087 | 2623 |
| 1.7286869 | 3.3142603 | PROMOTEI         | 487.7001 | 1.1906351 | 2.282532  | 2190 |
| 2.4770052 | 5.5674056 | PROMOTEI         | 331.7652 |           |           |      |
| 2.0167568 | 4.0467306 | PROMOTER         |          | 1.671989  | 3.1865361 | 2826 |
| 2.3010995 | 4.9283322 | PROMOTEI         | 199.1546 | 1.6357889 | 3.1075743 | 2066 |
| 2.5493214 | 5.8535888 | PROMOTEI         | 360.6487 | 2.1619039 | 4.4750503 | 531  |
| 1.913066  | 3.7660861 | PROMOTEI         | 436.7241 | 1.6002544 | 3.0319677 | 974  |
| 1.9688483 | 3.914555  | PROMOTER         |          | 1.666196  | 3.1737665 | 1213 |
| 1.6754664 | 3.194226  | PROMOTEI         | 202.681  | 1.9123582 | 3.7642389 | 1067 |
| 1.9640538 | 3.9015673 | PROMOTEI         | 283.9656 | 1.8760622 | 3.6707178 | 1098 |

|           |           |                    |          |           |           |      |
|-----------|-----------|--------------------|----------|-----------|-----------|------|
| 2.0355449 | 4.0997755 | PROMOTEI           | 108.3109 | 1.6164429 | 3.0661811 | 3751 |
| 2.3941    | 5.2564908 | PROMOTER           |          | 1.7023778 | 3.2543689 | 2821 |
| 1.8580955 | 3.6252877 | PROMOTEI           | 363.7543 | 1.4478409 | 2.7279948 | 696  |
| 2.1952965 | 4.5798378 | PROMOTER           |          |           |           |      |
| 1.8566278 | 3.6216015 | PROMOTEI           | 529.8228 | 1.5303957 | 2.8886506 | 3381 |
| 1.9646432 | 3.9031616 | PROMOTEI           | 991.4445 | 1.3758476 | 2.5952034 | 3637 |
| 1.8529794 | 3.6124545 | PROMOTEI           | 127.1122 |           |           |      |
| 2.163723  | 4.4806965 | PROMOTEI           | 178.7713 | 1.4296153 | 2.6937488 | 2685 |
| 2.2716906 | 4.8288867 | PROMOTEI           | 252.2342 | 2.4759798 | 5.56345   | 499  |
| 2.0116348 | 4.0323889 | PROMOTEI           | 234.7794 | 1.4824309 | 2.7941915 | 3791 |
| 1.9784276 | 3.9406336 | DIVERGENT_PROMOTER |          |           |           |      |
| 1.6840545 | 3.2132974 | PROMOTEI           | 3726.071 | 1.7451519 | 3.3523015 | 2062 |
| 2.023671  | 4.0661713 | PROMOTEI           | 102.9169 | 1.664378  | 3.1697696 | 2431 |
| 1.5928344 | 3.0164139 | PROMOTER           |          | 1.5908729 | 3.0123155 | 3502 |
| 2.2898839 | 4.8901676 | DIVERGENT_PROMOT   |          | 2.2190351 | 4.6558194 | 413  |
| 1.9509032 | 3.866165  | PROMOTEI           | 308.9102 | 1.4987069 | 2.8258931 | 203  |
| 2.4352546 | 5.4085977 | PROMOTEI           | 225.1925 | 2.0289893 | 4.0811884 | 3473 |
| 2.5577528 | 5.8878985 | PROMOTEI           | 2314.035 | 2.1225595 | 4.3546582 | 521  |
| 1.9255307 | 3.7987656 | PROMOTEI           | 222.0645 | 0.9854198 | 1.9798893 | 2764 |
| 2.2653515 | 4.8077154 | PROMOTER           |          | 1.8245631 | 3.5419973 | 3878 |
| 2.0141773 | 4.0395016 | PROMOTEI           | 143.6874 | 1.8554254 | 3.6185843 | 2294 |
| 1.7304926 | 3.318411  | PROMOTER           |          |           |           |      |
| 2.2156136 | 4.6447907 | PROMOTEI           | 843.5709 | 1.682198  | 3.2091651 | 3280 |
| 2.276292  | 4.8443127 | PROMOTEI           | 194.7737 | 2.0905464 | 4.2590935 | 2089 |
| 2.2030141 | 4.604403  | PROMOTEI           | 108.6247 | 1.6234506 | 3.0811109 | 2822 |
| 1.9234511 | 3.7932938 | PROMOTEI           | 1270.613 | 1.7566435 | 3.3791104 | 1473 |
| 1.7536075 | 3.3720069 | PROMOTEI           | 382.3934 | 1.6564875 | 3.1524806 | 472  |
| 2.1103134 | 4.3178508 | PROMOTEI           | 498.326  | 1.8458005 | 3.5945234 | 698  |
| 2.0598657 | 4.1694749 | PROMOTER           |          | 1.9706272 | 3.9193847 | 3242 |
| 1.8391749 | 3.5780534 | PROMOTEI           | 1099.776 | 1.4440737 | 2.7208807 | 3025 |
| 1.9036074 | 3.7414757 | PROMOTER           |          | 1.7485924 | 3.3603055 | 1633 |
| 2.3348289 | 5.0449113 | DIVERGENT_PROMOT   |          | 2.406788  | 5.3029237 | 840  |
| 2.277784  | 4.8493252 | PROMOTEI           | 126.5289 |           |           |      |
| 1.7118388 | 3.2757808 | DIVERGENT_PROMOT   |          | 1.2630974 | 2.4001048 | 4031 |
| 2.193629  | 4.5745474 | PROMOTEI           | 1143.589 |           |           |      |
| 2.3287976 | 5.0238647 | PROMOTEI           | 1913.052 | 1.5519778 | 2.9321884 | 1253 |
| 2.2691398 | 4.8203563 | PROMOTER           |          | 2.1969988 | 4.5852449 | 2268 |
| 2.2383924 | 4.7187096 | PROMOTEI           | 1256.333 | 2.0913296 | 4.2614063 | 1005 |
| 2.1825275 | 4.5394814 | PROMOTEI           | 177.8335 | 1.4645433 | 2.7597609 | 1134 |
| 2.1065073 | 4.3064745 | PROMOTER           |          | 1.6227336 | 3.07958   | 4844 |
| 1.9682083 | 3.9128188 | PROMOTEI           | 273.3061 | 1.511287  | 2.8506423 | 2386 |
| 1.9382373 | 3.8323712 | PROMOTEI           | 2968.167 | 2.3068104 | 4.9478796 | 200  |
| 1.93827   | 3.832458  | PROMOTEI           | 217.5818 | 1.336044  | 2.5245811 | 4375 |
| 1.7579206 | 3.382103  | PROMOTEI           | 335.0933 | 1.7126733 | 3.2776761 | 669  |
| 2.1340992 | 4.3896296 | PROMOTEI           | 954.3102 | 1.4299107 | 2.6943004 | 2835 |
| 2.1446455 | 4.4218359 | PROMOTEI           | 199.0596 | 1.6364803 | 3.109064  | 1501 |
| 1.7821429 | 3.4393666 | PROMOTEI           | 1216.038 | 1.4192134 | 2.6743966 | 843  |
| 2.381033  | 5.2090959 | PROMOTEI           | 349.8228 | 1.6994979 | 3.247879  | 1210 |
| 1.9781846 | 3.9399699 | PROMOTEI           | 147.0826 | 1.5280788 | 2.8840153 | 2483 |
| 1.9342232 | 3.821723  | PROMOTEI           | 127.341  | 1.5914534 | 3.0135279 | 3673 |
| 2.3723433 | 5.1778146 | PROMOTEI           | 275.0907 | 1.9173077 | 3.7771752 | 1154 |
| 2.191852  | 4.5689163 | PROMOTEI           | 305.6624 | 1.6130427 | 3.0589631 | 1785 |
| 2.2741995 | 4.8372916 | PROMOTEI           | 215.9091 | 1.8538513 | 3.6146383 | 2720 |
| 1.8393613 | 3.5785157 | PROMOTEI           | 217.8988 | 1.5196469 | 2.8672087 | 2588 |
| 2.3695624 | 5.1678436 | PROMOTEI           | 585.1212 | 1.9026936 | 3.7391066 | 2359 |
| 2.1592357 | 4.4667815 | PROMOTEI           | 178.711  | 1.686266  | 3.2182268 | 651  |
| 2.3907163 | 5.2441767 | PROMOTER           |          | 2.2627556 | 4.7990725 | 324  |
| 2.245622  | 4.7424153 | PROMOTER           |          |           |           |      |

|           |           |                  |          |           |           |      |
|-----------|-----------|------------------|----------|-----------|-----------|------|
| 2.52901   | 5.7717548 | PROMOTER         |          | 1.8111907 | 3.509318  | 2667 |
| 2.171687  | 4.5054993 | PROMOTER         |          | 1.5906941 | 3.0119422 | 3747 |
| 1.7003372 | 3.2497691 | PROMOTEI         | 6258.366 | 1.919781  | 3.7836562 | 242  |
| 2.0697114 | 4.1980269 | PROMOTEI         | 1639.165 |           |           |      |
| 2.1087587 | 4.3132003 | PROMOTER         |          | 1.4999255 | 2.8282811 | 1467 |
| 2.1040683 | 4.2992002 | PROMOTER         |          | 1.8117368 | 3.5106467 | 403  |
| 2.0589542 | 4.1668414 | PROMOTER         |          | 1.9057878 | 3.7471346 | 3230 |
| 2.1930504 | 4.5727131 | PROMOTER         |          | 1.6282282 | 3.0913311 | 5176 |
| 2.4754868 | 5.5615492 | PROMOTEI         | 864.9915 | 2.0652473 | 4.1850571 | 3803 |
| 1.7560345 | 3.3776843 | PROMOTEI         | 413.3716 | 1.9389931 | 3.8343794 | 914  |
| 1.9278314 | 3.8048284 | PROMOTEI         | 203.6267 |           |           |      |
| 2.1959941 | 4.5820529 | PROMOTEI         | 707.666  | 1.5771707 | 2.9838411 | 4326 |
| 1.7139641 | 3.28061   | PROMOTEI         | 132.0355 | 1.6120569 | 3.0568736 | 540  |
| 1.6861794 | 3.2180336 | PROMOTEI         | 112.8122 | 1.2266868 | 2.3402892 | 5047 |
| 2.4631987 | 5.51438   | PROMOTER         |          |           |           |      |
| 2.0261552 | 4.073179  | PROMOTEI         | 2575.444 | 1.936159  | 3.8268544 | 2946 |
| 1.9269931 | 3.8026182 | PROMOTEI         | 127.9797 | 1.223885  | 2.3357486 | 3851 |
| 1.9344305 | 3.8222721 | PROMOTEI         | 154.8084 | 1.145752  | 2.2126143 | 2841 |
| 2.1729221 | 4.5093582 | PROMOTEI         | 297.8694 | 1.4715995 | 2.773292  | 5570 |
| 2.188765  | 4.5591504 | PROMOTEI         | 851.0921 | 1.4636633 | 2.7580781 | 3672 |
| 2.2722285 | 4.8306874 | PROMOTEI         | 13488.31 | 1.8959414 | 3.7216475 | 2877 |
| 2.8497946 | 7.2089773 | PROMOTEI         | 76.9155  | 1.3566988 | 2.560985  | 4416 |
| 2.0708969 | 4.2014779 | PROMOTEI         | 860.8332 | 2.0554833 | 4.1568287 | 358  |
| 2.193446  | 4.5739671 | PROMOTEI         | 295.1817 | 2.1190803 | 4.3441692 | 880  |
| 1.9223348 | 3.7903598 | PROMOTEI         | 274.4572 | 1.986533  | 3.9628353 | 1062 |
| 2.254632  | 4.7721256 | PROMOTER         |          | 1.7201377 | 3.2946785 | 1141 |
| 1.9107524 | 3.7600514 | PROMOTEI         | 192.0076 | 1.5629681 | 2.9546108 | 3622 |
| 1.8074282 | 3.5001778 | PROMOTEI         | 223.9659 |           |           |      |
| 1.9831808 | 3.953638  | PROMOTEI         | 155.1674 | 1.6795541 | 3.2032893 | 1336 |
| 1.8131156 | 3.5140034 | PROMOTEI         | 240.6488 | 1.8618517 | 3.6347388 | 2079 |
| 1.7941998 | 3.4682305 | PROMOTEI         | 103.7495 |           |           |      |
| 2.031921  | 4.0894902 | PROMOTEI         | 138.19   | 1.7128239 | 3.2780183 | 2509 |
| 2.2429957 | 4.73379   | PROMOTER         |          |           |           |      |
| 1.6010938 | 3.0337323 | PROMOTEI         | 320.0715 | 1.3602674 | 2.5673276 | 3555 |
| 2.0498703 | 4.1406874 | PROMOTEI         | 251.6095 |           |           |      |
| 2.0150945 | 4.0420705 | PROMOTEI         | 588.8972 | 1.5809469 | 2.9916614 | 3482 |
| 2.1061118 | 4.3052941 | PROMOTEI         | 143.5876 | 1.923363  | 3.7930621 | 1378 |
| 2.4373734 | 5.4165469 | PROMOTEI         | 348.2357 | 2.02967   | 4.0831144 | 397  |
| 1.7347952 | 3.3283224 | PROMOTER         |          | 1.3535287 | 2.5553638 | 2770 |
| 1.9983925 | 3.9955455 | PROMOTEI         | 280.5894 | 1.8948258 | 3.7187707 | 981  |
| 2.4113295 | 5.3196433 | PROMOTEI         | 165.8085 | 1.8327447 | 3.5621412 | 2659 |
| 2.4039721 | 5.2925834 | PROMOTER         |          | 2.0530076 | 4.1497016 | 446  |
| 2.3049183 | 4.9413947 | PROMOTEI         | 4656.197 | 2.3500788 | 5.098521  | 60   |
| 2.3713758 | 5.1743434 | PROMOTEI         | 2939.857 | 1.8957505 | 3.721155  | 2525 |
| 1.7310016 | 3.319582  | PROMOTEI         | 171.3057 | 1.7548721 | 3.374964  | 1110 |
| 1.9819922 | 3.9503821 | PROMOTEI         | 258.9309 | 2.0500195 | 4.1411157 | 1565 |
| 1.5962801 | 3.0236268 | PROMOTEI         | 127.2222 | 1.7546133 | 3.3743586 | 2528 |
| 2.5763955 | 5.9644764 | PROMOTER         |          | 1.2868934 | 2.4400207 | 5567 |
| 1.9734364 | 3.927024  | PROMOTEI         | 336.7737 | 1.3813758 | 2.6051669 | 1243 |
| 1.9941695 | 3.983867  | PROMOTEI         | 112.3844 | 1.6958103 | 3.2395879 | 1293 |
| 2.1947064 | 4.5779649 | PROMOTEI         | 1948.762 | 2.0986993 | 4.2832304 | 257  |
| 1.9341487 | 3.8215256 | PROMOTEI         | 217.7913 | 1.1730446 | 2.2548705 | 3196 |
| 1.7111374 | 3.2741885 | DIVERGENT_PROMOT |          | 1.2666682 | 2.4060526 | 4153 |
| 2.259046  | 4.7867485 | PROMOTER         |          | 1.4462162 | 2.7249244 | 590  |
| 1.7960513 | 3.4726844 | PROMOTER         |          | 1.2254666 | 2.3383106 | 2987 |
| 1.6378238 | 3.1119606 | PROMOTER         |          | 1.5750128 | 2.9793814 | 3501 |
| 1.6968248 | 3.2418668 | PROMOTEI         | 131.2019 | 1.529382  | 2.8866216 | 4764 |
| 2.2576895 | 4.7822498 | PROMOTER         |          | 1.7588077 | 3.3841833 | 3564 |

|           |           |                    |          |           |           |      |
|-----------|-----------|--------------------|----------|-----------|-----------|------|
| 2.1085198 | 4.3124861 | PROMOTEI           | 173.0345 | 1.6519648 | 3.1426134 | 3414 |
| 2.0724335 | 4.2059552 | PROMOTEI           | 412.7881 | 1.6250176 | 3.0844593 | 4173 |
| 2.2137346 | 4.6387452 | PROMOTER           |          | 1.4383307 | 2.7100711 | 3974 |
| 2.302209  | 4.9321238 | PROMOTER           |          | 1.610852  | 3.0543216 | 4409 |
| 1.8854921 | 3.6947893 | PROMOTEI           | 188.8511 | 1.2723289 | 2.4155118 | 3964 |
| 2.5222235 | 5.7446679 | PROMOTEI           | 1663.806 | 2.1376493 | 4.4004446 | 680  |
| 2.3656268 | 5.1537652 | PROMOTER           |          | 0.9086112 | 1.8772376 | 3616 |
| 1.7880198 | 3.4534056 | PROMOTER           |          | 1.6025336 | 3.0367615 | 1423 |
| 2.5755663 | 5.9610493 | PROMOTEI           | 1263.551 | 1.871605  | 3.6593946 | 2208 |
| 2.0588162 | 4.1664429 | PROMOTEI           | 1160.359 | 1.4131464 | 2.6631735 | 5410 |
| 1.800735  | 3.4839768 | PROMOTEI           | 159.1432 | 1.7356906 | 3.3303888 | 1628 |
| 2.7738192 | 6.8391603 | PROMOTEI           | 186.5042 | 1.6730691 | 3.1889226 | 2786 |
| 2.067793  | 4.1924483 | PROMOTER           |          | 1.5947553 | 3.0204328 | 236  |
| 2.2563975 | 4.777969  | PROMOTEI           | 110.9807 | 2.0769958 | 4.219277  | 1195 |
| 2.3824015 | 5.2140395 | PROMOTEI           | 830.9446 | 1.8302577 | 3.5560059 | 701  |
| 1.8733019 | 3.6637013 | PROMOTEI           | 130.7865 | 1.7638677 | 3.3960735 | 1460 |
| 2.1205308 | 4.3485391 | PROMOTEI           | 815.5103 | 1.6011555 | 3.0338621 | 3293 |
| 2.0946703 | 4.2712854 | PROMOTER           |          | 1.2016029 | 2.2999506 | 3456 |
| 2.14372   | 4.4190002 | PROMOTEI           | 870.1777 | 1.5794513 | 2.9885616 | 1145 |
| 2.3639016 | 5.1476059 | PROMOTEI           | 157.1127 |           |           |      |
| 2.0173059 | 4.0482711 | PROMOTEI           | 265.7877 | 1.5776769 | 2.9848882 | 2464 |
| 2.046362  | 4.1306305 | PROMOTEI           | 182.9944 | 1.9297782 | 3.8099662 | 3366 |
| 2.3058057 | 4.9444351 | PROMOTEI           | 280.1201 | 1.3676068 | 2.5804216 | 2414 |
| 2.0068629 | 4.0190733 | PROMOTEI           | 426.1135 | 1.5242604 | 2.8763922 | 1568 |
| 1.7190093 | 3.2921026 | PROMOTEI           | 213.7038 | 1.1154348 | 2.166603  | 4111 |
| 1.7905983 | 3.4595834 | PROMOTEI           | 136.639  | 1.6687429 | 3.1793744 | 4440 |
| 1.8589746 | 3.6274974 | DIVERGENT_PROMOT   |          | 1.8120309 | 3.5113624 | 3191 |
| 2.680262  | 6.4097229 | PROMOTER           |          | 1.7429413 | 3.3471688 | 3060 |
| 1.8643342 | 3.6409986 | PROMOTEI           | 97.3726  | 1.4211025 | 2.6779008 | 4286 |
| 2.0351171 | 4.0985599 | DIVERGENT_PROMOT   |          | 1.6384951 | 3.113409  | 1373 |
| 2.0212615 | 4.0593859 | PROMOTEI           | 196.2072 | 1.9029328 | 3.7397266 | 2140 |
| 2.7951899 | 6.9412231 | PROMOTER           |          | 1.6719979 | 3.1865557 | 1054 |
| 1.894605  | 3.7182016 | PROMOTEI           | 4040.948 | 2.080764  | 4.2303118 | 359  |
| 2.1229873 | 4.3559497 | DIVERGENT_PROMOTER |          |           |           |      |
| 2.4017723 | 5.2845195 | PROMOTEI           | 197.3252 | 2.20256   | 4.6029539 | 1289 |
| 2.3515983 | 5.1038938 | PROMOTER           |          | 1.7223264 | 3.2996806 | 642  |
| 2.3918312 | 5.2482309 | PROMOTEI           | 1961.677 | 1.6122007 | 3.0571783 | 864  |
| 2.5843437 | 5.997427  | PROMOTEI           | 226.9961 | 2.175498  | 4.5174167 | 1366 |
| 1.9864541 | 3.9626186 | DIVERGENT_PROMOT   |          | 1.1491526 | 2.2178359 | 1512 |
| 2.0326698 | 4.0916133 | PROMOTEI           | 184.8454 | 1.9010817 | 3.7349313 | 3388 |
| 2.4891741 | 5.6145644 | PROMOTEI           | 181.6756 | 1.4567711 | 2.7449333 | 2799 |
| 2.9316845 | 7.6300076 | PROMOTER           |          | 2.3954692 | 5.2614819 | 3228 |
| 1.8135544 | 3.5150724 | PROMOTEI           | 177.8609 | 1.1702074 | 2.2504405 | 3202 |
| 2.1869946 | 4.5535591 | PROMOTER           |          | 1.7024075 | 3.2544359 | 2520 |
| 2.5563118 | 5.8820204 | PROMOTER           |          | 2.135069  | 4.3925813 | 3544 |
| 1.5979884 | 3.0272092 | PROMOTEI           | 1470.823 | 1.3981494 | 2.6356328 | 3352 |
| 2.269404  | 4.8212392 | PROMOTEI           | 122.8532 | 2.1223123 | 4.3539122 | 595  |
| 2.2797158 | 4.8558229 | PROMOTER           |          | 1.9341836 | 3.8216181 | 1574 |
| 2.0216782 | 4.0605586 | PROMOTER           |          | 1.8819869 | 3.6858233 | 1744 |
| 2.2993617 | 4.9223993 | PROMOTEI           | 461.3543 | 1.5510781 | 2.9303604 | 2310 |
| 1.8055428 | 3.4956065 | PROMOTER           |          | 2.031613  | 4.0886172 | 1787 |
| 1.7788135 | 3.4314385 | PROMOTEI           | 145.7537 | 1.4861131 | 2.8013322 | 3658 |
| 2.5035715 | 5.6708756 | PROMOTEI           | 106.8174 | 1.7958113 | 3.4721067 | 3005 |
| 1.8187588 | 3.5277756 | PROMOTEI           | 675.5691 | 1.29504   | 2.453838  | 3067 |
| 2.2995718 | 4.9231162 | PROMOTEI           | 172.9444 | 1.3784446 | 2.5998792 | 4171 |
| 2.3416877 | 5.0689527 | PROMOTEI           | 193.5536 | 1.6234928 | 3.081201  | 3852 |
| 2.1512628 | 4.4421644 | DIVERGENT_PROMOT   |          | 1.375376  | 2.5943552 | 4004 |
| 2.6849024 | 6.4303729 | PROMOTEI           | 1002.816 | 2.0804515 | 4.2293956 | 2573 |

|           |           |                  |          |           |           |      |
|-----------|-----------|------------------|----------|-----------|-----------|------|
| 2.2863405 | 4.8781716 | PROMOTER         |          | 1.5492413 | 2.9266319 | 1749 |
| 1.7289729 | 3.3149173 | PROMOTER         |          | 1.7213213 | 3.2973826 | 2817 |
| 2.330675  | 5.0304065 | PROMOTEI         | 1812.044 | 1.9781667 | 3.939921  | 1599 |
| 1.8553314 | 3.6183486 | PROMOTEI         | 269.1726 | 1.3756956 | 2.59493   | 3003 |
| 2.0266705 | 4.0746341 | PROMOTEI         | 201.4943 |           |           |      |
| 2.422019  | 5.359205  | PROMOTER         |          | 1.5376742 | 2.9032609 | 1931 |
| 2.0416856 | 4.117263  | DIVERGENT_PROMOT |          | 1.3458089 | 2.5417267 | 1754 |
| 2.0233576 | 4.0652881 | PROMOTEI         | 494.0114 |           |           |      |
| 2.2473965 | 4.748252  | PROMOTEI         | 619.2216 | 1.6801646 | 3.2046451 | 1637 |
| 2.4906845 | 5.6204455 | PROMOTEI         | 393.4145 | 1.6549859 | 3.1492011 | 2126 |
| 2.5204797 | 5.7377285 | PROMOTEI         | 1489.153 | 1.4572572 | 2.7458583 | 846  |
| 1.7660618 | 3.4012423 | PROMOTER         |          | 1.4779017 | 2.7854332 | 4978 |
| 2.3650503 | 5.1517061 | PROMOTEI         | 138.9749 | 1.6847495 | 3.2148457 | 4729 |
| 2.1287615 | 4.3734188 | DIVERGENT_PROMOT |          | 1.6321236 | 3.0996893 | 4822 |
| 2.4333293 | 5.4013847 | PROMOTEI         | 129.4601 |           |           |      |
| 1.9364984 | 3.8277548 | PROMOTER         |          | 1.1240071 | 2.179515  | 2210 |
| 1.8982892 | 3.7277089 | PROMOTEI         | 1023.471 | 1.7691833 | 3.4086094 | 254  |
| 2.4425921 | 5.4361758 | PROMOTEI         | 240.4068 |           |           |      |
| 1.8307248 | 3.5571574 | DIVERGENT_PROMOT |          | 1.5116277 | 2.8513155 | 3553 |
| 2.1836488 | 4.543011  | PROMOTEI         | 471.9194 | 2.5640886 | 5.9138129 | 344  |
| 2.5328782 | 5.7872509 | PROMOTEI         | 816.048  | 1.9455179 | 3.8517602 | 2100 |
| 2.8864117 | 7.3942904 | PROMOTEI         | 183.6019 |           |           |      |
| 2.262616  | 4.7986081 | PROMOTER         |          | 1.8569124 | 3.622316  | 1543 |
| 2.2417145 | 4.729588  | PROMOTEI         | 971.1636 | 1.7329576 | 3.3240858 | 3657 |
| 1.8072114 | 3.4996518 | PROMOTEI         | 671.4473 | 1.6444616 | 3.1263116 | 2413 |
| 2.2977958 | 4.9170595 | PROMOTEI         | 2956.742 | 1.0704597 | 2.1001024 | 4990 |
| 1.6346159 | 3.1050487 | PROMOTER         |          |           |           |      |
| 1.6408911 | 3.118584  | PROMOTEI         | 153.1858 | 1.8671159 | 3.6480257 | 1536 |
| 1.7014625 | 3.2523049 | PROMOTEI         | 314.3854 | 1.1043782 | 2.1500619 | 5446 |
| 1.7872599 | 3.4515871 | PROMOTER         |          | 1.8009117 | 3.4844035 | 3919 |
| 2.3918564 | 5.2483226 | PROMOTER         |          | 2.1240387 | 4.3591254 | 1404 |
| 1.6818639 | 3.208422  | PROMOTEI         | 85.70098 |           |           |      |
| 1.8937547 | 3.7160108 | PROMOTEI         | 168.5201 | 1.5451913 | 2.9184276 | 1399 |
| 2.5268161 | 5.7629843 | PROMOTEI         | 591.592  | 2.0133235 | 4.0371117 | 2251 |
| 2.697966  | 6.4888643 | PROMOTEI         | 405.7925 | 1.8148406 | 3.5182076 | 3606 |
| 1.6432734 | 3.1237379 | PROMOTEI         | 863.299  | 1.619036  | 3.0716972 | 2327 |
| 1.9954851 | 3.9875016 | PROMOTER         |          | 1.8156251 | 3.5201212 | 4070 |
| 2.315572  | 4.9780199 | PROMOTER         |          | 1.140114  | 2.2039844 | 4584 |
| 1.8110467 | 3.5089678 | PROMOTEI         | 139.8878 | 1.3845499 | 2.6109049 | 5445 |
| 1.768006  | 3.405829  | PROMOTER         |          | 1.8222865 | 3.5364123 | 1884 |
| 2.4510233 | 5.4680381 | PROMOTEI         | 764.2677 | 1.5468706 | 2.9218267 | 967  |
| 2.2243328 | 4.6729474 | PROMOTEI         | 275.1096 | 1.7298833 | 3.3170099 | 1794 |
| 1.9469241 | 3.8555164 | PROMOTER         |          |           |           |      |
| 1.9224653 | 3.7907027 | PROMOTEI         | 215.1919 | 1.6362671 | 3.1086045 | 1743 |
| 2.286059  | 4.8772198 | PROMOTEI         | 96.24478 | 1.3378334 | 2.5277143 | 4123 |
| 2.4106004 | 5.3169555 | PROMOTEI         | 1556.891 | 1.9258908 | 3.7997139 | 839  |
| 2.0368955 | 4.1036153 | PROMOTER         |          | 1.3134028 | 2.4852704 | 3771 |
| 2.163349  | 4.4795351 | PROMOTEI         | 120.6149 | 1.8948203 | 3.7187565 | 3053 |
| 1.6740171 | 3.1910188 | PROMOTEI         | 106.6046 | 1.6444584 | 3.1263047 | 4847 |
| 1.9446615 | 3.8494745 | PROMOTEI         | 499.506  | 1.6859243 | 3.2174647 | 3037 |
| 1.7193086 | 3.2927856 | PROMOTER         |          |           |           |      |
| 2.0069678 | 4.0193656 | PROMOTEI         | 354.1346 |           |           |      |
| 1.703222  | 3.2562738 | PROMOTEI         | 141.99   |           |           |      |
| 1.8312148 | 3.5583657 | PROMOTEI         | 282.303  | 1.2124826 | 2.3173607 | 3874 |
| 1.8957893 | 3.7212551 | PROMOTEI         | 133.8385 | 1.4143119 | 2.6653258 | 5011 |
| 1.809831  | 3.5060122 | PROMOTER         |          | 1.6031443 | 3.0380472 | 4176 |
| 2.000283  | 4.0007847 | PROMOTEI         | 922.3038 | 2.264903  | 4.806221  | 1778 |
| 1.9066889 | 3.7494758 | PROMOTEI         | 11311.83 | 1.9266405 | 3.801689  | 103  |

|           |           |                  |          |           |           |      |
|-----------|-----------|------------------|----------|-----------|-----------|------|
| 1.8768748 | 3.6727859 | PROMOTER         |          | 1.2825737 | 2.4327258 | 5244 |
| 2.958422  | 7.7727332 | PROMOTEI         | 205.5009 | 1.3217703 | 2.4997266 | 1392 |
| 2.1416135 | 4.4125527 | PROMOTER         |          | 2.166688  | 4.4899146 | 2688 |
| 1.7377224 | 3.3350824 | PROMOTER         |          | 1.5134587 | 2.8549366 | 454  |
| 1.8984231 | 3.7280549 | PROMOTEI         | 729.2892 | 1.4896818 | 2.8082703 | 1733 |
| 1.9524102 | 3.8702056 | DIVERGENT_PROMOT |          | 1.3580216 | 2.5633342 | 4229 |
| 2.6173203 | 6.1360928 | PROMOTEI         | 724.4135 | 1.8343656 | 3.5661456 | 2839 |
| 2.2266285 | 4.6803892 | PROMOTER         |          | 1.1352776 | 2.1966083 | 2402 |
| 1.995099  | 3.9864346 | PROMOTER         |          |           |           |      |
| 2.4667199 | 5.5278555 | PROMOTEI         | 872.402  | 2.0119183 | 4.0331814 | 339  |
| 2.0814054 | 4.2321929 | PROMOTER         |          | 1.7138852 | 3.2804306 | 5438 |
| 2.1835837 | 4.542806  | DIVERGENT_PROMOT |          | 1.809712  | 3.505723  | 282  |
| 1.9348965 | 3.823507  | PROMOTEI         | 528.3964 |           |           |      |
| 2.0735042 | 4.2090779 | PROMOTEI         | 554.2599 | 2.336361  | 5.0502717 | 2193 |
| 1.8266134 | 3.5470346 | PROMOTEI         | 231.7223 | 1.4986147 | 2.8257125 | 4259 |
| 3.0033562 | 8.0186324 | PROMOTEI         | 181.1016 | 1.8147559 | 3.518001  | 3311 |
| 2.8608708 | 7.2645367 | PROMOTEI         | 394.0499 | 1.8949621 | 3.7191221 | 1591 |
| 1.6160039 | 3.0652482 | DIVERGENT_PROMOT |          | 1.3810124 | 2.6045108 | 3812 |
| 1.9911307 | 3.9754845 | PROMOTEI         | 408.0121 | 1.645071  | 3.1276325 | 812  |
| 2.0599337 | 4.1696714 | PROMOTEI         | 126.8617 | 1.6744897 | 3.1920643 | 3942 |
| 1.8999999 | 3.7321317 | PROMOTER         |          | 1.5768878 | 2.983256  | 3418 |
| 1.9775186 | 3.9381515 | DIVERGENT_PROMOT |          | 1.5647851 | 2.9583343 | 3384 |
| 2.1352077 | 4.3930037 | PROMOTEI         | 195.3805 |           |           |      |
| 2.0344267 | 4.0965991 | PROMOTEI         | 136.1205 |           |           |      |
| 2.5758927 | 5.9623981 | PROMOTEI         | 727.1005 | 1.7194121 | 3.2930219 | 3109 |
| 2.034872  | 4.0978637 | PROMOTEI         | 96.22607 |           |           |      |
| 2.3824048 | 5.2140514 | PROMOTEI         | 167.0766 | 1.3722092 | 2.5886667 | 4025 |
| 1.7715492 | 3.4142039 | PROMOTEI         | 363.6962 | 1.3918478 | 2.6241457 | 5059 |
| 2.0912461 | 4.2611596 | PROMOTEI         | 368.0821 | 1.916421  | 3.7748544 | 4298 |
| 2.634767  | 6.2107479 | PROMOTEI         | 912.3536 | 1.1492069 | 2.2179193 | 5276 |
| 1.8181163 | 3.5262049 | DIVERGENT_PROMOT |          | 1.5180013 | 2.8639401 | 4264 |
| 1.86814   | 3.6506162 | PROMOTEI         | 1243.954 | 1.4489696 | 2.7301299 | 2872 |
| 2.5196066 | 5.7342571 | PROMOTER         |          | 2.0538974 | 4.1522618 | 2265 |
| 2.229004  | 4.6881021 | PROMOTEI         | 391.2604 | 1.9324327 | 3.8169828 | 1719 |
| 1.7976519 | 3.4765393 | PROMOTEI         | 110.1176 | 1.5309802 | 2.8898211 | 2929 |
| 2.5374422 | 5.805588  | PROMOTEI         | 1410.137 | 2.1188323 | 4.3434225 | 2408 |
| 2.7852142 | 6.8933927 | PROMOTER         |          |           |           |      |
| 2.1931844 | 4.5731378 | PROMOTER         |          |           |           |      |
| 2.0200338 | 4.0559329 | PROMOTEI         | 464.8571 | 1.1133767 | 2.1635144 | 4614 |
| 2.384471  | 5.2215242 | PROMOTEI         | 286.4463 |           |           |      |
| 2.3058817 | 4.9446956 | PROMOTEI         | 497.2812 | 1.966371  | 3.9078389 | 1377 |
| 2.0079875 | 4.0222075 | PROMOTER         |          | 1.2691451 | 2.410187  | 3833 |
| 1.6988505 | 3.2464219 | PROMOTEI         | 573.8652 | 1.6087186 | 3.0498084 | 979  |
| 2.498252  | 5.6500044 | PROMOTEI         | 863.8556 | 1.8361567 | 3.5705757 | 278  |
| 2.1332648 | 4.3870915 | DIVERGENT_PROMOT |          | 1.5369107 | 2.9017248 | 1669 |
| 1.8205786 | 3.5322283 | PROMOTER         |          | 1.6168649 | 3.0670781 | 856  |
| 2.3041549 | 4.9387807 | PROMOTEI         | 700.8199 | 1.4847615 | 2.798709  | 3664 |
| 2.0512276 | 4.1445849 | PROMOTER         |          | 1.6881623 | 3.2224597 | 4113 |
| 1.9704435 | 3.9188857 | PROMOTEI         | 88.78243 | 1.4526005 | 2.7370096 | 5088 |
| 1.8332431 | 3.563372  | PROMOTER         |          |           |           |      |
| 2.1656873 | 4.4868013 | PROMOTEI         | 730.7578 | 1.8285767 | 3.5518649 | 3556 |
| 2.039511  | 4.1110616 | PROMOTER         |          | 2.282727  | 4.8659686 | 58   |
| 2.9405775 | 7.6771855 | PROMOTER         |          | 2.2488704 | 4.7531054 | 1402 |
| 1.7335628 | 3.3254805 | PROMOTER         |          | 1.4789793 | 2.7875145 | 3763 |
| 1.864356  | 3.6410537 | PROMOTER         |          | 1.7276106 | 3.3117886 | 2389 |
| 2.0530205 | 4.1497387 | PROMOTER         |          | 1.1047918 | 2.1506784 | 4242 |
| 2.2642837 | 4.8041583 | PROMOTEI         | 613.741  | 1.9324613 | 3.8170585 | 751  |
| 1.8281279 | 3.5507601 | PROMOTEI         | 696.3493 |           |           |      |

|           |           |                  |          |           |           |      |
|-----------|-----------|------------------|----------|-----------|-----------|------|
| 2.5008178 | 5.6600618 | PROMOTEI         | 193.6667 |           |           |      |
| 1.9593481 | 3.8888622 | PROMOTEI         | 1734.761 |           |           |      |
| 1.6928068 | 3.2328505 | PROMOTER         |          | 1.7691479 | 3.4085258 | 1421 |
| 1.7101833 | 3.2720239 | PROMOTEI         | 502.2681 |           |           |      |
| 1.685068  | 3.2155555 | PROMOTER         |          | 1.995972  | 3.9888476 | 2447 |
| 1.9695635 | 3.916496  | PROMOTER         |          | 1.5924149 | 3.0155369 | 5145 |
| 1.8602288 | 3.6306524 | PROMOTEI         | 236.3873 | 1.4975579 | 2.8236434 | 3258 |
| 2.0369008 | 4.1036304 | PROMOTER         |          | 1.2935139 | 2.4512437 | 4532 |
| 1.664859  | 3.1708266 | PROMOTER         |          |           |           |      |
| 1.6767617 | 3.1970952 | PROMOTER         |          | 1.5973598 | 3.0258905 | 1825 |
| 3.528277  | 11.537646 | PROMOTER         |          | 2.0402174 | 4.1130751 | 5581 |
| 2.3573399 | 5.1242466 | PROMOTER         |          | 2.0071824 | 4.0199635 | 3157 |
| 1.9653004 | 3.9049401 | PROMOTEI         | 369.0428 | 2.158931  | 4.4658383 | 2869 |
| 1.5908664 | 3.012302  | PROMOTEI         | 183.7687 | 1.2465295 | 2.3726997 | 1910 |
| 1.957219  | 3.8831273 | PROMOTEI         | 131.0789 |           |           |      |
| 2.0611954 | 4.1733196 | PROMOTEI         | 94.43925 | 2.0899    | 4.2571856 | 5273 |
| 2.289155  | 4.8876975 | PROMOTER         |          | 1.9065443 | 3.7491    | 596  |
| 1.6974069 | 3.2431751 | PROMOTER         |          |           |           |      |
| 1.7323897 | 3.3227775 | PROMOTEI         | 466.0422 | 1.699783  | 3.2485209 | 679  |
| 2.2122917 | 4.6341081 | PROMOTER         |          | 1.5309577 | 2.8897761 | 4424 |
| 1.8442228 | 3.5905947 | PROMOTER         |          | 1.393219  | 2.6266409 | 1272 |
| 2.0111065 | 4.0309126 | PROMOTEI         | 456.0044 | 2.2145245 | 4.6412857 | 62   |
| 1.7728236 | 3.4172211 | PROMOTER         |          | 1.7543613 | 3.3737692 | 3322 |
| 1.8222365 | 3.5362898 | PROMOTEI         | 224.1715 |           |           |      |
| 2.364198  | 5.1486636 | PROMOTER         |          | 1.1628002 | 2.2389157 | 3355 |
| 1.9874156 | 3.9652604 | PROMOTEI         | 146.8766 | 2.0455444 | 4.1282902 | 1887 |
| 1.8572772 | 3.623232  | PROMOTEI         | 139.1322 | 1.4847579 | 2.798702  | 1348 |
| 2.2479036 | 4.7499213 | PROMOTEI         | 112.824  | 1.9310819 | 3.8134107 | 1381 |
| 1.8335856 | 3.564218  | PROMOTEI         | 134.6672 | 1.4757122 | 2.7812091 | 4768 |
| 2.0506802 | 4.1430126 | PROMOTEI         | 502.8844 |           |           |      |
| 1.7138362 | 3.2803192 | PROMOTER         |          | 1.7666582 | 3.4026487 | 1255 |
| 2.1092076 | 4.3145425 | PROMOTEI         | 973.6815 | 1.349945  | 2.5490241 | 4301 |
| 1.5871185 | 3.0044866 | PROMOTEI         | 573.7904 | 1.3932904 | 2.6267709 | 3427 |
| 1.6931815 | 3.2336903 | PROMOTEI         | 1364.311 | 1.8162929 | 3.521751  | 1643 |
| 1.6933484 | 3.2340644 | PROMOTEI         | 821.299  |           |           |      |
| 1.8662075 | 3.6457294 | PROMOTER         |          | 1.5164233 | 2.8608092 | 3475 |
| 1.8662133 | 3.6457441 | PROMOTEI         | 1289.441 | 2.1308076 | 4.3796258 | 871  |
| 1.9995972 | 3.9988834 | PROMOTEI         | 174.3207 | 2.0089192 | 4.0248059 | 1010 |
| 1.7601775 | 3.387398  | PROMOTER         |          | 1.2629821 | 2.399913  | 3748 |
| 1.6588395 | 3.1576242 | PROMOTEI         | 257.2018 | 1.3830407 | 2.608175  | 2038 |
| 1.6466779 | 3.131118  | DIVERGENT_PROMOT |          | 1.6537199 | 3.1464388 | 4372 |
| 2.516999  | 5.7239021 | PROMOTEI         | 2405.241 | 2.3804166 | 5.2068708 | 184  |
| 1.7768241 | 3.42671   | PROMOTER         |          | 1.2729634 | 2.4165744 | 4163 |
| 1.9954367 | 3.9873678 | DIVERGENT_PROMOT |          | 1.6788374 | 3.2016984 | 2538 |
| 2.2150526 | 4.6429849 | PROMOTER         |          | 1.9537524 | 3.8738079 | 853  |
| 1.7946037 | 3.4692016 | PROMOTEI         | 349.4107 |           |           |      |
| 2.2789392 | 4.8532097 | DIVERGENT_PROMOT |          | 1.7405486 | 3.3416221 | 2245 |
| 2.1834776 | 4.5424719 | PROMOTER         |          | 2.4121425 | 5.3226419 | 1510 |
| 2.1927757 | 4.5718425 | PROMOTEI         | 397.5721 | 2.1785831 | 4.5270872 | 2393 |
| 1.6925972 | 3.2323809 | PROMOTER         |          | 1.1035346 | 2.148805  | 3947 |
| 1.6144695 | 3.0619898 | PROMOTER         |          | 2.1669815 | 4.4908281 | 1717 |
| 1.6753076 | 3.1938744 | PROMOTEI         | 126.4728 | 1.6897669 | 3.2260458 | 1339 |
| 1.9523885 | 3.8701474 | PROMOTEI         | 282.6956 | 1.7227578 | 3.3006675 | 1826 |
| 1.8893882 | 3.7047808 | PROMOTEI         | 121.4319 | 1.2840893 | 2.4352828 | 4856 |
| 1.8646476 | 3.6417897 | PROMOTEI         | 903.0444 |           |           |      |
| 1.9533252 | 3.872661  | PROMOTEI         | 381.7869 | 1.575767  | 2.9809393 | 4260 |
| 2.0722098 | 4.2053031 | PROMOTEI         | 1623.979 |           |           |      |
| 2.002212  | 4.0061377 | PROMOTER         |          | 2.069407  | 4.1971412 | 573  |

|           |           |                    |          |           |           |      |
|-----------|-----------|--------------------|----------|-----------|-----------|------|
| 1.8346947 | 3.5669592 | PROMOTEI           | 1155.977 | 1.6430787 | 3.1233163 | 3525 |
| 1.9153591 | 3.7720769 | PROMOTEI           | 230.5238 |           |           |      |
| 1.8066249 | 3.4982294 | DIVERGENT_PROMOTER |          |           |           |      |
| 1.9618672 | 3.8956585 | PROMOTEI           | 1153.536 |           |           |      |
| 1.6259346 | 3.0864204 | PROMOTEI           | 131.0363 | 1.5090947 | 2.8463138 | 3439 |
| 1.9661158 | 3.9071477 | PROMOTER           |          | 1.2895077 | 2.4444463 | 5476 |
| 2.5328429 | 5.7871093 | PROMOTEI           | 240.7852 | 1.9641932 | 3.9019443 | 990  |
| 2.159523  | 4.4676712 | PROMOTEI           | 244.6638 | 1.7657405 | 3.4004849 | 2931 |
| 2.2097218 | 4.6258606 | DIVERGENT_PROMOTER |          |           |           |      |
| 1.8087246 | 3.5033244 | PROMOTER           |          | 2.1072304 | 4.3086335 | 105  |
| 2.1816018 | 4.5365696 | PROMOTEI           | 296.8487 | 1.8144841 | 3.5173383 | 1535 |
| 1.7063769 | 3.2634024 | PROMOTEI           | 292.6122 | 1.8860403 | 3.6961935 | 3288 |
| 2.459683  | 5.5009584 | PROMOTER           |          | 1.4666513 | 2.7637963 | 3819 |
| 1.6346028 | 3.1050205 | PROMOTEI           | 198.6927 | 1.2562083 | 2.3886712 | 2106 |
| 1.6893085 | 3.2250209 | PROMOTER           |          | 1.7820864 | 3.4392319 | 2451 |
| 2.0283282 | 4.0793186 | PROMOTEI           | 473.8011 | 2.147522  | 4.4306612 | 1092 |
| 1.8095586 | 3.5053502 | PROMOTEI           | 155.5743 |           |           |      |
| 1.9832536 | 3.9538376 | PROMOTEI           | 147.7679 |           |           |      |
| 2.0520148 | 4.1468469 | PROMOTEI           | 161.478  | 2.668877  | 6.3593398 | 421  |
| 2.2004867 | 4.5963438 | PROMOTER           |          | 1.6241242 | 3.0825498 | 3568 |
| 1.696161  | 3.2403755 | PROMOTER           |          | 1.65497   | 3.1491664 | 4922 |
| 2.0376    | 4.1056197 | PROMOTEI           | 830.1649 | 2.1473873 | 4.4302475 | 1563 |
| 2.2302303 | 4.6920887 | PROMOTEI           | 508.7854 | 1.6506081 | 3.1396595 | 2102 |
| 2.6251554 | 6.1695078 | PROMOTEI           | 299.2472 | 1.4377156 | 2.7089159 | 1994 |
| 2.234085  | 4.7046422 | PROMOTEI           | 85.93652 | 1.3664579 | 2.5783675 | 2860 |
| 1.9715165 | 3.9218015 | PROMOTEI           | 202.6157 |           |           |      |
| 1.9819453 | 3.9502537 | PROMOTER           |          |           |           |      |
| 1.9033691 | 3.7408577 | PROMOTEI           | 215.372  |           |           |      |
| 1.8867843 | 3.6981002 | PROMOTEI           | 183.7605 |           |           |      |
| 1.6923842 | 3.2319037 | PROMOTER           |          |           |           |      |
| 2.159452  | 4.4674513 | PROMOTEI           | 126.1667 | 2.1794617 | 4.529845  | 775  |
| 1.8369114 | 3.572444  | PROMOTEI           | 250.2899 | 1.7690009 | 3.4081785 | 1852 |
| 2.3271554 | 5.0181493 | PROMOTER           |          |           |           |      |
| 1.9009652 | 3.7346297 | PROMOTER           |          | 1.4163059 | 2.6690122 | 3318 |
| 2.0987577 | 4.2834038 | PROMOTEI           | 1406.942 | 2.658834  | 6.3152244 | 127  |
| 2.066494  | 4.1886751 | PROMOTEI           | 169.9572 |           |           |      |
| 2.0422258 | 4.1188049 | PROMOTEI           | 1329.452 | 1.8884159 | 3.7022849 | 742  |
| 2.6220996 | 6.1564539 | PROMOTEI           | 151.6563 | 1.588787  | 3.0079634 | 4441 |
| 2.1253834 | 4.3631903 | PROMOTEI           | 183.3552 | 1.8150692 | 3.5187651 | 3104 |
| 1.7741486 | 3.420361  | PROMOTEI           | 255.982  | 1.5236549 | 2.8751852 | 3831 |
| 1.9915844 | 3.9767349 | PROMOTER           |          | 1.86013   | 3.6304037 | 3618 |
| 2.74355   | 6.6971626 | PROMOTEI           | 436.3669 |           |           |      |
| 1.7066694 | 3.2640641 | DIVERGENT_PROMOT   |          | 1.6611211 | 3.1626219 | 4679 |
| 1.9479119 | 3.8581571 | PROMOTER           |          | 1.7412258 | 3.343191  | 3884 |
| 2.5290434 | 5.7718884 | PROMOTEI           | 122.4724 |           |           |      |
| 1.9277859 | 3.8047084 | PROMOTEI           | 741.5244 | 1.9866807 | 3.963241  | 1999 |
| 1.9371713 | 3.8295405 | PROMOTER           |          |           |           |      |
| 2.5105917 | 5.6985375 | DIVERGENT_PROMOT   |          | 2.1972156 | 4.585934  | 219  |
| 1.9144108 | 3.7695983 | PROMOTEI           | 235.7595 | 1.4704062 | 2.770999  | 3966 |
| 1.8434541 | 3.588682  | PROMOTER           |          | 1.8185502 | 3.5272656 | 681  |
| 2.0324378 | 4.0909554 | PROMOTER           |          | 1.7411247 | 3.3429568 | 2188 |
| 2.5290692 | 5.7719916 | PROMOTEI           | 372.4756 | 2.1363523 | 4.3964903 | 2020 |
| 1.6861161 | 3.2178924 | PROMOTER           |          |           |           |      |
| 2.0426307 | 4.1199611 | PROMOTEI           | 824.6495 | 1.3863176 | 2.6141059 | 3579 |
| 1.7834011 | 3.4423674 | PROMOTER           |          | 1.454549  | 2.7407087 | 3257 |
| 3.1068594 | 8.6150514 | PROMOTEI           | 673.6596 | 2.802619  | 6.9770588 | 457  |
| 2.1441267 | 4.4202461 | PROMOTEI           | 727.1943 | 1.4325787 | 2.6992876 | 1783 |
| 1.6145731 | 3.0622097 | PROMOTER           |          | 1.0745466 | 2.1060601 | 3983 |



|           |           |                  |          |           |           |      |
|-----------|-----------|------------------|----------|-----------|-----------|------|
| 2.1609504 | 4.4720937 | PROMOTER         |          | 1.7599809 | 3.3869364 | 2978 |
| 1.8820052 | 3.68587   | PROMOTEI         | 227.53   |           |           |      |
| 1.9740298 | 3.9286395 | PROMOTER         |          | 1.4310478 | 2.6964248 | 1948 |
| 1.9201263 | 3.7845619 | DIVERGENT_PROMOT |          | 1.5739073 | 2.9770992 | 2628 |
| 2.246816  | 4.7463418 | PROMOTEI         | 159.168  | 1.5942249 | 3.0193226 | 4473 |
| 2.5797021 | 5.9781624 | DIVERGENT_PROMOT |          | 2.136379  | 4.3965717 | 3721 |
| 1.9296546 | 3.8096398 | PROMOTER         |          | 1.7903457 | 3.4589777 | 3991 |
| 2.1612885 | 4.4731418 | PROMOTEI         | 329.1989 | 2.0997822 | 4.2864467 | 124  |
| 2.1545193 | 4.4522028 | PROMOTER         |          | 2.0623739 | 4.17673   | 3240 |
| 1.9576194 | 3.8842051 | PROMOTEI         | 1319.567 | 1.753801  | 3.3724592 | 1171 |
| 2.1524448 | 4.4458054 | PROMOTEI         | 446.4848 | 2.587692  | 6.0113624 | 41   |
| 2.3516457 | 5.1040615 | PROMOTEI         | 237.155  |           |           |      |
| 1.6256602 | 3.0858335 | PROMOTEI         | 108.6981 | 1.4212326 | 2.6781423 | 4872 |
| 2.2246227 | 4.6738865 | PROMOTEI         | 1627.969 | 1.6005573 | 3.0326044 | 1521 |
| 2.1276944 | 4.3701851 | PROMOTEI         | 2892.337 |           |           |      |
| 2.484291  | 5.5955929 | PROMOTEI         | 217.3064 | 1.8567536 | 3.6219173 | 1498 |
| 2.3900774 | 5.2418548 | PROMOTER         |          | 1.7963828 | 3.4734824 | 3184 |
| 2.14647   | 4.4274315 | PROMOTEI         | 215.66   |           |           |      |
| 1.7471836 | 3.3570257 | PROMOTEI         | 885.3558 | 1.5438578 | 2.9157314 | 2583 |
| 2.2356732 | 4.7098242 | PROMOTEI         | 293.4939 | 1.8524355 | 3.6110928 | 1340 |
| 1.9095887 | 3.7570198 | PROMOTEI         | 569.2095 |           |           |      |
| 2.2467196 | 4.7460247 | PROMOTEI         | 1344.687 | 2.0009165 | 4.0025419 | 1811 |
| 1.9716997 | 3.9222995 | PROMOTER         |          | 1.5391746 | 2.9062818 | 4967 |
| 2.374233  | 5.1846011 | PROMOTEI         | 338.3428 | 1.9419653 | 3.842287  | 4224 |
| 2.6642344 | 6.3389083 | PROMOTER         |          | 1.9149293 | 3.7709533 | 2933 |
| 2.0295622 | 4.0828093 | PROMOTEI         | 102.0094 |           |           |      |
| 1.7414169 | 3.3436339 | PROMOTEI         | 515.1627 | 1.7969351 | 3.4748124 | 1876 |
| 2.3550131 | 5.1159888 | PROMOTER         |          | 2.106259  | 4.3057334 | 102  |
| 2.2310739 | 4.6948332 | PROMOTER         |          | 2.0239816 | 4.0670468 | 1912 |
| 2.202393  | 4.6024211 | PROMOTEI         | 815.3384 | 1.5614644 | 2.9515329 | 3100 |
| 1.9353806 | 3.8247902 | PROMOTEI         | 3140.873 | 1.7686158 | 3.4072689 | 1546 |
| 1.9076943 | 3.7520897 | PROMOTEI         | 261.8723 | 1.5916864 | 3.0140146 | 322  |
| 1.8401595 | 3.5804961 | PROMOTEI         | 176.6488 |           |           |      |
| 2.6297002 | 6.1889737 | PROMOTER         |          |           |           |      |
| 2.0313017 | 4.0877351 | PROMOTEI         | 2299.944 | 1.9531379 | 3.8721582 | 920  |
| 2.3350382 | 5.0456432 | PROMOTER         |          | 1.584525  | 2.9990904 | 4917 |
| 1.7528937 | 3.370339  | DIVERGENT_PROMOT |          | 1.6607072 | 3.1617147 | 2619 |
| 2.4663224 | 5.5263326 | PROMOTEI         | 945.683  | 2.3583176 | 5.1277204 | 2493 |
| 2.1265917 | 4.3668461 | DIVERGENT_PROMOT |          | 1.5623792 | 2.953405  | 2749 |
| 1.8247359 | 3.5424215 | PROMOTEI         | 1012.562 |           |           |      |
| 1.9902271 | 3.9729953 | PROMOTER         |          | 2.1197028 | 4.3460441 | 166  |
| 2.0188153 | 4.0525087 | PROMOTEI         | 133.8223 | 2.2863092 | 4.8780657 | 3992 |
| 2.1728683 | 4.50919   | PROMOTEI         | 992.829  | 1.7592677 | 3.3852625 | 5317 |
| 1.8527042 | 3.6117654 | PROMOTEI         | 131.4608 |           |           |      |
| 1.8605266 | 3.6314019 | PROMOTER         |          |           |           |      |
| 2.3259397 | 5.0139225 | PROMOTEI         | 121.159  |           |           |      |
| 1.6981227 | 3.2447846 | PROMOTER         |          | 1.3647819 | 2.5753739 | 1161 |
| 1.6264378 | 3.0874971 | PROMOTEI         | 123.7646 | 1.1063846 | 2.1530541 | 3846 |
| 1.6924127 | 3.2319675 | PROMOTEI         | 235.3421 | 1.7329154 | 3.3239885 | 1271 |
| 1.97925   | 3.9428805 | PROMOTER         |          | 1.3262869 | 2.5075647 | 1569 |
| 2.554074  | 5.8729038 | PROMOTEI         | 169.0576 | 1.3658274 | 2.5772409 | 5044 |
| 1.8805606 | 3.6821811 | PROMOTEI         | 90.83684 |           |           |      |
| 2.1762552 | 4.5197883 | PROMOTEI         | 707.448  | 1.994422  | 3.9845644 | 2205 |
| 1.8676131 | 3.6492832 | PROMOTEI         | 254.1987 |           |           |      |
| 2.0777674 | 4.2215342 | DIVERGENT_PROMOT |          | 1.707846  | 3.2667272 | 1429 |
| 2.3844626 | 5.2214938 | PROMOTER         |          | 2.2039719 | 4.6074608 | 1986 |
| 1.6010882 | 3.0337206 | PROMOTER         |          | 1.478127  | 2.7858682 | 1581 |
| 1.8090833 | 3.5041956 | PROMOTEI         | 113.916  |           |           |      |

|           |           |                  |          |           |           |      |
|-----------|-----------|------------------|----------|-----------|-----------|------|
| 2.0179985 | 4.050215  | PROMOTEI         | 603.8729 | 1.6062952 | 3.0446897 | 1977 |
| 1.9843442 | 3.9568276 | PROMOTEI         | 507.5022 | 1.8813133 | 3.6841028 | 513  |
| 1.948881  | 3.8607496 | DIVERGENT_PROMOT |          | 1.7260405 | 3.3081863 | 868  |
| 1.7203208 | 3.2950967 | PROMOTER         |          | 1.2436602 | 2.3679854 | 1839 |
| 1.661946  | 3.1644308 | PROMOTEI         | 735.6082 | 1.6774876 | 3.1987042 | 4104 |
| 2.3173037 | 4.9839987 | PROMOTEI         | 301.767  | 1.5832874 | 2.9965187 | 2392 |
| 1.9504219 | 3.8648754 | DIVERGENT_PROMOT |          | 1.2245369 | 2.3368043 | 4947 |
| 2.5420997 | 5.8243607 | PROMOTEI         | 238.3685 | 1.5776474 | 2.9848272 | 3405 |
| 1.8913155 | 3.7097334 | PROMOTER         |          | 1.9608675 | 3.8929599 | 887  |
| 2.0250795 | 4.070143  | PROMOTEI         | 172.5571 |           |           |      |
| 2.2221096 | 4.6657519 | PROMOTEI         | 273.0686 | 1.4596252 | 2.750369  | 5323 |
| 2.3821635 | 5.2131794 | PROMOTEI         | 191.4248 | 1.6445078 | 3.1264118 | 3062 |
| 2.1668162 | 4.4903136 | PROMOTEI         | 102.0313 | 1.8658452 | 3.644814  | 453  |
| 1.6966586 | 3.2414933 | PROMOTER         |          | 1.6967099 | 3.2416086 | 2973 |
| 2.203592  | 4.6062477 | PROMOTER         |          |           |           |      |
| 1.8061925 | 3.4971811 | PROMOTEI         | 426.6448 |           |           |      |
| 2.4016335 | 5.2840111 | PROMOTEI         | 3002     | 1.6213171 | 3.0765578 | 4869 |
| 2.0529122 | 4.1494272 | DIVERGENT_PROMOT |          | 1.640919  | 3.1186443 | 2781 |
| 2.3843544 | 5.2211022 | PROMOTEI         | 108.0507 | 1.8701682 | 3.655752  | 3572 |
| 2.3943813 | 5.2575159 | PROMOTEI         | 2050.742 | 1.7449927 | 3.3519316 | 952  |
| 2.020128  | 4.0561978 | PROMOTEI         | 128.856  | 1.7666551 | 3.4026414 | 571  |
| 2.1488013 | 4.4345918 | PROMOTEI         | 586.8477 | 2.4254494 | 5.3719631 | 81   |
| 2.2599669 | 4.7898049 | PROMOTER         |          | 1.7503979 | 3.3645135 | 1784 |
| 2.250661  | 4.7590084 | PROMOTEI         | 520.4139 | 1.6118815 | 3.056502  | 2823 |
| 2.368738  | 5.1648913 | PROMOTER         |          |           |           |      |
| 2.2452047 | 4.7410437 | PROMOTER         |          | 1.5587746 | 2.9460351 | 3923 |
| 1.8761714 | 3.6709956 | PROMOTEI         | 114.7014 | 1.6620393 | 3.1646354 | 3938 |
| 1.9015461 | 3.7361337 | PROMOTER         |          | 1.6829598 | 3.2108601 | 1630 |
| 1.8900219 | 3.7064085 | PROMOTER         |          | 1.4733521 | 2.776663  | 1842 |
| 2.255592  | 4.7753021 | PROMOTER         |          |           |           |      |
| 1.8984083 | 3.7280166 | PROMOTEI         | 155.2332 | 1.7517003 | 3.3675522 | 4699 |
| 2.2507193 | 4.7592007 | PROMOTER         |          | 1.5480273 | 2.9241702 | 2684 |
| 2.341441  | 5.068086  | PROMOTEI         | 104.8606 | 1.4116964 | 2.6604981 | 4438 |
| 2.366365  | 5.1564029 | PROMOTEI         | 251.1839 |           |           |      |
| 2.3246744 | 5.009527  | DIVERGENT_PROMOT |          | 2.0009754 | 4.0027053 | 1055 |
| 1.6842387 | 3.2137077 | PROMOTEI         | 948.2019 | 1.5087868 | 2.8457064 | 5528 |
| 2.3882606 | 5.2352579 | PROMOTEI         | 225.548  | 1.2805558 | 2.4293255 | 4102 |
| 2.269922  | 4.8229705 | PROMOTER         |          | 1.4574406 | 2.7462074 | 4750 |
| 1.598391  | 3.0280541 | PROMOTEI         | 5138.132 | 1.8870347 | 3.6987421 | 2639 |
| 1.7244927 | 3.304639  | PROMOTEI         | 175.5248 |           |           |      |
| 1.8585728 | 3.6264873 | PROMOTEI         | 204.3389 |           |           |      |
| 1.6311805 | 3.0976636 | PROMOTEI         | 117.6825 | 1.2125837 | 2.3175231 | 3943 |
| 1.9440002 | 3.8477104 | PROMOTEI         | 1420.568 | 1.6641098 | 3.1691804 | 1468 |
| 2.9095755 | 7.5139708 | DIVERGENT_PROMOT |          | 1.5715717 | 2.9722834 | 4839 |
| 2.0880349 | 4.2516855 | PROMOTEI         | 319.0362 | 1.7124718 | 3.2772184 | 1895 |
| 1.616044  | 3.0653334 | PROMOTEI         | 491.1275 | 1.1737986 | 2.2560493 | 2620 |
| 2.107067  | 4.3081456 | PROMOTER         |          |           |           |      |
| 2.0830107 | 4.2369048 | PROMOTEI         | 256.3558 | 1.7184142 | 3.2907449 | 5173 |
| 1.9763466 | 3.9349535 | PROMOTER         |          |           |           |      |
| 2.105134  | 4.3023772 | PROMOTER         |          | 2.2693963 | 4.8212134 | 193  |
| 2.3850403 | 5.2235851 | PROMOTEI         | 300.1681 | 2.5076625 | 5.6869791 | 961  |
| 1.915479  | 3.7723904 | PROMOTEI         | 230.4821 | 1.5090321 | 2.8461902 | 3856 |
| 1.8816    | 3.6848349 | PROMOTER         |          | 1.9920062 | 3.9778978 | 1053 |
| 1.6352669 | 3.1064501 | PROMOTER         |          |           |           |      |
| 1.991926  | 3.9776766 | DIVERGENT_PROMOT |          | 1.6526403 | 3.1440852 | 2000 |
| 2.3609102 | 5.1369435 | PROMOTEI         | 155.6606 |           |           |      |
| 1.8842394 | 3.6915825 | PROMOTEI         | 11059.15 | 1.6226872 | 3.0794809 | 298  |
| 2.2698343 | 4.8226774 | PROMOTEI         | 390.2161 | 1.2092042 | 2.3121006 | 3817 |

|           |           |                    |          |           |           |      |
|-----------|-----------|--------------------|----------|-----------|-----------|------|
| 1.9523647 | 3.8700835 | DIVERGENT_PROMOTER |          |           |           |      |
| 1.6365974 | 3.1093163 | PROMOTEI           | 773.694  | 1.7149519 | 3.282857  | 2110 |
| 2.3460445 | 5.0842836 | PROMOTEI           | 334.4414 | 1.8046256 | 3.4933849 | 2238 |
| 2.0057878 | 4.0160794 | DIVERGENT_PROMOT   |          | 1.5866668 | 3.0035461 | 4239 |
| 2.449828  | 5.4635096 | PROMOTEI           | 142.4904 |           |           |      |
| 2.2362273 | 4.7116334 | PROMOTEI           | 148.12   | 2.0577598 | 4.1633932 | 336  |
| 2.0926874 | 4.2654188 | PROMOTER           |          |           |           |      |
| 2.0923197 | 4.2643318 | PROMOTEI           | 315.1288 |           |           |      |
| 1.8898114 | 3.7058678 | PROMOTER           |          |           |           |      |
| 2.1072507 | 4.3086942 | PROMOTER           |          |           |           |      |
| 2.1232407 | 4.3567149 | DIVERGENT_PROMOTER |          |           |           |      |
| 1.7846547 | 3.4453599 | PROMOTEI           | 903.5555 | 1.6661981 | 3.1737711 | 3690 |
| 2.2232509 | 4.6694444 | PROMOTEI           | 5500.217 | 1.8949677 | 3.7191365 | 337  |
| 2.2511299 | 4.7605554 | PROMOTEI           | 359.263  | 2.197878  | 4.5880401 | 1219 |
| 2.6193585 | 6.1447678 | DIVERGENT_PROMOT   |          | 2.0338562 | 4.0949794 | 2699 |
| 1.6274092 | 3.0895767 | PROMOTEI           | 2349.954 | 2.5084848 | 5.6902215 | 20   |
| 2.0748413 | 4.2129807 | PROMOTER           |          | 1.7602023 | 3.3874562 | 523  |
| 1.7959464 | 3.4724319 | DIVERGENT_PROMOT   |          | 2.253515  | 4.7684322 | 224  |
| 2.0263433 | 4.0737101 | PROMOTEI           | 274.9883 | 1.2882648 | 2.4423413 | 1631 |
| 2.4201488 | 5.3522622 | PROMOTEI           | 2876.913 | 1.5806721 | 2.9910916 | 2730 |
| 2.0703156 | 4.1997854 | PROMOTEI           | 160.0947 | 1.478147  | 2.7859068 | 3504 |
| 1.8294259 | 3.5539562 | PROMOTEI           | 104.6969 | 1.234166  | 2.3524532 | 1221 |
| 2.6989658 | 6.4933627 | PROMOTER           |          |           |           |      |
| 1.654483  | 3.1481036 | PROMOTEI           | 143.3709 |           |           |      |
| 1.9844208 | 3.9570377 | PROMOTEI           | 4687.351 | 1.8429868 | 3.5875198 | 848  |
| 2.2276218 | 4.6836128 | PROMOTER           |          | 1.873399  | 3.6639479 | 3462 |
| 2.2768655 | 4.8462388 | PROMOTEI           | 382.6017 | 2.5578506 | 5.8882976 | 791  |
| 1.9150994 | 3.771398  | PROMOTER           |          | 1.4257826 | 2.686602  | 5304 |
| 1.618498  | 3.0705519 | PROMOTEI           | 140.4408 | 1.1314061 | 2.1907215 | 5162 |
| 2.6454728 | 6.2570074 | PROMOTEI           | 874.1541 | 1.2045792 | 2.3047004 | 3212 |
| 2.0448396 | 4.1262739 | PROMOTEI           | 211.8183 | 1.4819819 | 2.793322  | 1921 |
| 2.8465817 | 7.1929406 | DIVERGENT_PROMOT   |          | 2.3652143 | 5.1522918 | 2362 |
| 1.737555  | 3.3346954 | PROMOTEI           | 333.4046 |           |           |      |
| 2.1047447 | 4.3012163 | PROMOTER           |          |           |           |      |
| 2.3180404 | 4.9865444 | PROMOTEI           | 152.4081 | 1.8132291 | 3.5142799 | 4476 |
| 1.6790106 | 3.2020828 | PROMOTEI           | 2615.832 |           |           |      |
| 2.1573458 | 4.460934  | PROMOTER           |          | 1.6861004 | 3.2178574 | 1914 |
| 2.6046665 | 6.0825088 | PROMOTER           |          | 2.401979  | 5.2852767 | 1780 |
| 2.0432212 | 4.1216477 | PROMOTEI           | 211.0051 | 1.8507367 | 3.6068432 | 2438 |
| 1.7154261 | 3.2839362 | PROMOTER           |          | 1.4162737 | 2.6689526 | 3590 |
| 1.8006247 | 3.4837104 | PROMOTEI           | 4289.878 | 1.2757406 | 2.4212308 | 2469 |
| 2.3747509 | 5.1864626 | PROMOTER           |          | 1.9605913 | 3.8922147 | 582  |
| 1.8736655 | 3.6646248 | PROMOTEI           | 162.4404 | 1.6008055 | 3.0331261 | 4295 |
| 2.0740361 | 4.21063   | PROMOTEI           | 127.4913 |           |           |      |
| 1.8313406 | 3.558676  | PROMOTEI           | 561.7726 |           |           |      |
| 1.8759924 | 3.6705402 | PROMOTEI           | 1341.191 | 1.9535877 | 3.8733657 | 1993 |
| 2.0247066 | 4.0690912 | PROMOTER           |          | 2.0784216 | 4.2234489 | 3170 |
| 2.4406736 | 5.4289515 | PROMOTEI           | 534.6191 | 1.9546181 | 3.8761331 | 1080 |
| 2.285511  | 4.8753676 | PROMOTEI           | 430.3247 | 1.6310128 | 3.0973036 | 4062 |
| 2.175024  | 4.5159327 | PROMOTEI           | 324.4171 | 2.6100588 | 6.1052857 | 46   |
| 2.614758  | 6.1252045 | PROMOTER           |          |           |           |      |
| 1.7534467 | 3.3716311 | PROMOTER           |          |           |           |      |
| 1.9931484 | 3.9810484 | PROMOTEI           | 267.0079 | 1.6279875 | 3.0908154 | 2599 |
| 2.5622618 | 5.9063293 | PROMOTEI           | 1517.006 |           |           |      |
| 2.4341805 | 5.4045725 | PROMOTER           |          |           |           |      |
| 1.8442793 | 3.5907353 | PROMOTER           |          | 1.4887353 | 2.8064285 | 4502 |
| 2.5897927 | 6.0201219 | PROMOTEI           | 543.7068 | 1.6991262 | 3.2470423 | 1698 |
| 1.8469871 | 3.5974811 | PROMOTER           |          | 1.1596001 | 2.233955  | 2932 |

|           |           |                    |          |           |           |      |
|-----------|-----------|--------------------|----------|-----------|-----------|------|
| 1.6121879 | 3.0571512 | PROMOTER           |          | 1.4354599 | 2.7046837 | 5255 |
| 1.6963243 | 3.2407423 | PROMOTEI           | 491.8988 | 1.5637883 | 2.956291  | 1130 |
| 2.1719127 | 4.5062042 | PROMOTEI           | 91.21246 | 2.326105  | 5.014497  | 703  |
| 2.1244094 | 4.3602456 | PROMOTER           |          | 1.6568844 | 3.153348  | 2049 |
| 1.9808729 | 3.9473184 | DIVERGENT_PROMOT   |          | 2.0009027 | 4.0025036 | 2829 |
| 2.5946105 | 6.0402594 | PROMOTER           |          |           |           |      |
| 1.6408663 | 3.1185304 | PROMOTER           |          | 1.5833479 | 2.9966444 | 5443 |
| 1.7442688 | 3.3502501 | PROMOTEI           | 311.9728 | 1.3409815 | 2.533236  | 4968 |
| 2.2939014 | 4.9038043 | PROMOTEI           | 1347.569 | 1.9289087 | 3.8076707 | 2114 |
| 1.7974918 | 3.4761535 | PROMOTEI           | 124.068  | 1.4621671 | 2.7552192 | 5478 |
| 1.9088042 | 3.7549773 | PROMOTER           |          | 1.6163718 | 3.06603   | 1228 |
| 1.9018241 | 3.7368537 | PROMOTEI           | 191.634  |           |           |      |
| 1.8757145 | 3.6698332 | DIVERGENT_PROMOTER |          |           |           |      |
| 2.3466172 | 5.0863023 | PROMOTER           |          |           |           |      |
| 2.0452611 | 4.1274796 | PROMOTEI           | 571.7365 | 1.5872806 | 3.0048242 | 4589 |
| 1.6205354 | 3.0748913 | PROMOTEI           | 262.7106 | 1.6761239 | 3.1956821 | 4724 |
| 1.7199357 | 3.2942172 | PROMOTEI           | 160.0667 | 1.4731843 | 2.7763401 | 5126 |
| 1.6748679 | 3.1929012 | PROMOTER           |          | 1.6256922 | 3.0859019 | 1567 |
| 2.7803595 | 6.8702352 | PROMOTER           |          | 2.0882504 | 4.2523207 | 1266 |
| 1.770016  | 3.4105774 | DIVERGENT_PROMOT   |          | 1.407927  | 2.653556  | 3276 |
| 2.502594  | 5.6670346 | DIVERGENT_PROMOTER |          |           |           |      |
| 2.0723345 | 4.2056666 | PROMOTEI           | 10840.51 | 2.436898  | 5.4147623 | 980  |
| 2.1791427 | 4.5288435 | PROMOTER           |          | 1.7007043 | 3.2505961 | 4816 |
| 1.7892116 | 3.4562596 | PROMOTER           |          | 1.4540884 | 2.7398338 | 2943 |
| 1.700192  | 3.249442  | PROMOTEI           | 827.512  | 1.3350618 | 2.5228629 | 4851 |
| 1.6577471 | 3.1552342 | PROMOTEI           | 487.2851 | 1.6643528 | 3.1697143 | 5425 |
| 1.620888  | 3.0756429 | PROMOTEI           | 118.4153 |           |           |      |
| 2.1310809 | 4.3804555 | PROMOTEI           | 146.1612 |           |           |      |
| 2.1234264 | 4.3572757 | PROMOTEI           | 927.7042 | 1.7094216 | 3.2702969 | 3127 |
| 1.7798026 | 3.4337919 | PROMOTEI           | 1387.803 | 1.6200659 | 3.0738908 | 2972 |
| 1.9771659 | 3.9371888 | DIVERGENT_PROMOT   |          | 2.4551003 | 5.4835124 | 1306 |
| 2.35863   | 5.1288309 | PROMOTEI           | 216.5453 | 1.189887  | 2.2813487 | 3410 |
| 1.7108849 | 3.2736155 | PROMOTEI           | 679.2217 | 1.8575063 | 3.6238074 | 2133 |
| 2.073423  | 4.208841  | PROMOTEI           | 190.7843 | 1.6172227 | 3.0678388 | 4595 |
| 1.7826315 | 3.4405316 | PROMOTEI           | 1284.333 |           |           |      |
| 1.8669184 | 3.6475263 | PROMOTEI           | 825.2341 | 1.2763332 | 2.4222255 | 2142 |
| 2.4245586 | 5.3686472 | PROMOTEI           | 326.3202 | 1.4564536 | 2.7443293 | 4517 |
| 2.0108254 | 4.0301273 | DIVERGENT_PROMOT   |          | 1.5232797 | 2.8744376 | 3131 |
| 1.6723207 | 3.1872688 | PROMOTER           |          | 1.4390111 | 2.7113495 | 2805 |
| 1.7876111 | 3.4524275 | PROMOTER           |          | 1.4175853 | 2.6713802 | 1547 |
| 1.9401302 | 3.8374028 | DIVERGENT_PROMOT   |          | 1.5710739 | 2.971258  | 2394 |
| 2.2052767 | 4.6116298 | PROMOTEI           | 494.8671 | 1.0555851 | 2.078561  | 4079 |
| 2.032557  | 4.0912934 | PROMOTER           |          | 1.007322  | 2.0101762 | 5041 |
| 1.6825308 | 3.2099054 | PROMOTEI           | 171.1766 |           |           |      |
| 1.7993331 | 3.4805929 | PROMOTEI           | 1108.615 | 1.4238554 | 2.6830155 | 1108 |
| 1.8761005 | 3.6708152 | PROMOTEI           | 90.75128 | 1.2176023 | 2.3255989 | 5056 |
| 1.9027421 | 3.7392323 | PROMOTEI           | 1507.211 | 1.685589  | 3.216717  | 1398 |
| 1.6895131 | 3.2254783 | PROMOTEI           | 569.0947 | 1.7945596 | 3.4690956 | 2771 |
| 2.0447674 | 4.1260674 | PROMOTEI           | 709.5767 | 1.5591323 | 2.9467656 | 2280 |
| 2.2325258 | 4.6995604 | PROMOTEI           | 197.554  |           |           |      |
| 1.7768605 | 3.4267965 | PROMOTEI           | 366.9747 | 1.4624698 | 2.7557973 | 724  |
| 2.2568069 | 4.7793251 | PROMOTEI           | 933.8489 | 2.681059  | 6.4132649 | 1009 |
| 2.3638122 | 5.1472869 | PROMOTER           |          | 2.1367385 | 4.3976674 | 3403 |
| 2.177764  | 4.5245177 | PROMOTEI           | 392.7815 | 1.9243891 | 3.7957609 | 1242 |
| 2.3057003 | 4.9440739 | PROMOTER           |          |           |           |      |
| 1.8768957 | 3.6728391 | PROMOTEI           | 121.2442 | 1.4549342 | 2.7414406 | 1867 |
| 2.2397168 | 4.7230434 | PROMOTEI           | 92.41115 |           |           |      |
| 2.3741517 | 5.184309  | PROMOTER           |          | 1.4610412 | 2.7530698 | 4833 |

|           |           |                    |          |           |           |      |
|-----------|-----------|--------------------|----------|-----------|-----------|------|
| 1.8613579 | 3.6334949 | PROMOTEI           | 835.831  | 1.6505549 | 3.1395437 | 3195 |
| 1.9029106 | 3.739669  | PROMOTEI           | 678.9102 | 1.4364188 | 2.706482  | 5596 |
| 2.244021  | 4.7371554 | PROMOTEI           | 521.4952 | 1.5216895 | 2.871271  | 1284 |
| 1.8719044 | 3.6601541 | PROMOTEI           | 1505.778 | 1.495992  | 2.8205803 | 1555 |
| 1.9240392 | 3.7948404 | PROMOTEI           | 726.8564 | 2.1361506 | 4.3958757 | 2014 |
| 2.0784996 | 4.2236773 | PROMOTEI           | 1923.643 | 1.9688203 | 3.914479  | 333  |
| 2.0448844 | 4.1264021 | PROMOTEI           | 116.9683 | 1.5845858 | 2.9992168 | 2372 |
| 2.035492  | 4.0996251 | PROMOTEI           | 1180.973 | 1.7629019 | 3.3938008 | 2092 |
| 1.6187917 | 3.0711771 | PROMOTER           |          | 1.5117412 | 2.8515399 | 5327 |
| 2.4378514 | 5.4183418 | PROMOTEI           | 189.4646 | 1.7928385 | 3.4649595 | 2729 |
| 2.2066534 | 4.6160326 | PROMOTEI           | 1412.509 | 1.8747696 | 3.6674304 | 1885 |
| 1.6861591 | 3.2179883 | PROMOTEI           | 215.0427 | 1.8012997 | 3.4853407 | 4830 |
| 2.2989182 | 4.9208864 | PROMOTEI           | 189.6788 | 0.8361942 | 1.7853342 | 2481 |
| 1.6630386 | 3.1668282 | PROMOTER           |          | 1.3068709 | 2.4740436 | 3014 |
| 2.0442665 | 4.1246351 | PROMOTEI           | 399.8205 | 2.5171463 | 5.7244866 | 441  |
| 1.6785431 | 3.2010453 | PROMOTEI           | 1750.791 | 1.8843263 | 3.6918049 | 519  |
| 1.6102546 | 3.0530572 | PROMOTEI           | 3874.771 | 2.9102268 | 7.5173637 | 27   |
| 1.6508838 | 3.1402595 | PROMOTEI           | 170.1208 | 2.14095   | 4.4105238 | 746  |
| 2.1802728 | 4.5323925 | PROMOTEI           | 108.1187 |           |           |      |
| 2.039134  | 4.1099875 | PROMOTEI           | 126.1331 | 1.8223307 | 3.5365207 | 3682 |
| 1.8620386 | 3.6352097 | PROMOTEI           | 2050.776 |           |           |      |
| 2.1759949 | 4.5189729 | PROMOTEI           | 214.4864 | 1.6540782 | 3.1472204 | 2154 |
| 1.9253448 | 3.7982762 | PROMOTEI           | 2353.397 | 1.6431944 | 3.1235668 | 3470 |
| 2.73259   | 6.6464778 | PROMOTEI           | 155.8575 | 1.4366653 | 2.7069445 | 3348 |
| 1.7781328 | 3.4298198 | DIVERGENT_PROMOTER |          |           |           |      |
| 2.3343437 | 5.0432149 | PROMOTER           |          |           |           |      |
| 2.1966527 | 4.5841451 | PROMOTER           |          | 1.442429  | 2.7177806 | 5243 |
| 2.153877  | 4.4502211 | PROMOTEI           | 165.4903 |           |           |      |
| 1.8146172 | 3.5176628 | PROMOTEI           | 197.8681 |           |           |      |
| 2.1615567 | 4.4739735 | PROMOTEI           | 150.9281 | 1.2366323 | 2.3564781 | 5072 |
| 2.0640075 | 4.1814621 | PROMOTEI           | 1917.03  | 2.010142  | 4.0282187 | 206  |
| 1.7094    | 3.2702479 | PROMOTER           |          |           |           |      |
| 2.0840807 | 4.2400483 | PROMOTEI           | 179.5975 | 1.626185  | 3.0869562 | 2698 |
| 2.173839  | 4.512225  | PROMOTEI           | 312.4597 | 1.7574415 | 3.38098   | 1382 |
| 2.1971734 | 4.5857999 | PROMOTEI           | 148.8131 |           |           |      |
| 2.3134627 | 4.9707471 | PROMOTER           |          | 1.8674449 | 3.6488577 | 4193 |
| 1.9106493 | 3.7597827 | PROMOTER           |          | 1.5829089 | 2.9957327 | 1614 |
| 1.703789  | 3.2575538 | PROMOTEI           | 1088.114 |           |           |      |
| 2.036094  | 4.1013362 | PROMOTEI           | 1952.828 | 1.994752  | 3.9854759 | 1052 |
| 1.7553864 | 3.3761673 | PROMOTEI           | 160.1275 | 1.8278623 | 3.5501065 | 199  |
| 2.4542978 | 5.4804631 | PROMOTEI           | 708.5726 | 1.4278352 | 2.6904271 | 2777 |
| 2.1292214 | 4.3748131 | PROMOTER           |          |           |           |      |
| 1.8896109 | 3.7053528 | PROMOTER           |          |           |           |      |
| 2.1126685 | 4.3249052 | PROMOTEI           | 406.0888 | 1.3301494 | 2.5142871 | 3356 |
| 2.3062468 | 4.9459471 | DIVERGENT_PROMOT   |          | 2.5806808 | 5.9822193 | 3190 |
| 1.8217567 | 3.5351139 | PROMOTER           |          | 1.1878325 | 2.2781022 | 2415 |
| 2.0985653 | 4.2828326 | PROMOTEI           | 1231.274 | 1.5612421 | 2.9510781 | 2240 |
| 1.9620334 | 3.8961073 | PROMOTEI           | 172.9685 | 1.4685535 | 2.7674428 | 3546 |
| 2.2376318 | 4.7162226 | PROMOTEI           | 321.2929 | 1.5331912 | 2.8942533 | 708  |
| 2.2180889 | 4.6527669 | PROMOTER           |          | 2.1647854 | 4.4839973 | 1489 |
| 1.8847386 | 3.6928601 | PROMOTEI           | 127.8018 |           |           |      |
| 2.2084157 | 4.6216746 | PROMOTEI           | 139.0073 | 1.1906906 | 2.2826198 | 4893 |
| 1.9494568 | 3.8622908 | PROMOTEI           | 160.3219 | 1.9333773 | 3.8194828 | 4002 |
| 1.6417043 | 3.1203423 | DIVERGENT_PROMOT   |          | 1.6007779 | 3.0330681 | 3713 |
| 1.6537027 | 3.1464013 | PROMOTEI           | 190.2984 | 1.5203413 | 2.868589  | 3419 |
| 2.7361593 | 6.6629418 | PROMOTEI           | 128.422  |           |           |      |
| 1.9062004 | 3.7482064 | PROMOTEI           | 418.8985 | 2.1077383 | 4.3101507 | 2316 |
| 1.7219119 | 3.2987327 | PROMOTEI           | 334.5595 |           |           |      |

|           |           |                  |           |           |           |      |
|-----------|-----------|------------------|-----------|-----------|-----------|------|
| 2.115449  | 4.3332486 | PROMOTEI         | 1051.863  |           |           |      |
| 1.7908196 | 3.4601141 | PROMOTEI         | 250.3751  |           |           |      |
| 1.9865197 | 3.9627987 | PROMOTEI         | 184.6241  |           |           |      |
| 2.079269  | 4.2259304 | DIVERGENT_PROMOT | 1.8545607 | 3.6164161 |           | 2182 |
| 1.9877721 | 3.9662403 | PROMOTEI         | 537.1799  | 1.2045277 | 2.3046181 | 5362 |
| 1.6990345 | 3.246836  | DIVERGENT_PROMOT | 1.5468503 | 2.9217856 |           | 1001 |
| 1.8914504 | 3.7100803 | PROMOTER         |           |           |           |      |
| 1.9213542 | 3.7877844 | PROMOTER         |           |           |           |      |
| 1.9183675 | 3.7799509 | PROMOTER         | 1.5128909 | 2.8538132 |           | 4677 |
| 1.74427   | 3.3502529 | PROMOTER         | 1.0396289 | 2.0556988 |           | 4747 |
| 1.6338137 | 3.1033226 | PROMOTER         | 1.415025  | 2.6666436 |           | 2532 |
| 1.9487624 | 3.8604323 | PROMOTER         | 0.651727  | 1.5710477 |           | 3931 |
| 2.0758195 | 4.2158382 | PROMOTEI         | 848.1772  |           |           |      |
| 2.4260833 | 5.374324  | PROMOTEI         | 132.0055  |           |           |      |
| 2.526172  | 5.760412  | PROMOTEI         | 586.8383  |           |           |      |
| 2.1546216 | 4.4525185 | PROMOTEI         | 185.4543  | 1.4726158 | 2.7752463 | 1729 |
| 1.6544578 | 3.1480486 | PROMOTER         |           | 1.5375051 | 2.9029206 | 4813 |
| 1.6030166 | 3.0377783 | PROMOTEI         | 641.5778  | 1.8298469 | 3.5549934 | 4285 |
| 2.1889327 | 4.5596804 | PROMOTEI         | 2086.941  | 1.6903273 | 3.2272991 | 5411 |
| 2.1262496 | 4.3658108 | PROMOTEI         | 205.9845  | 2.054272  | 4.1533401 | 1975 |
| 1.7926581 | 3.4645263 | PROMOTER         |           | 1.9694697 | 3.9162414 | 1954 |
| 2.1829934 | 4.5409476 | PROMOTER         |           | 1.409211  | 2.6559187 | 5403 |
| 2.3482912 | 5.0922075 | PROMOTEI         | 287.8134  | 1.724012  | 3.3035381 | 2812 |
| 1.9542717 | 3.8752025 | PROMOTEI         | 184.6692  | 1.7696695 | 3.4097584 | 1355 |
| 2.0267694 | 4.0749134 | PROMOTER         |           | 1.5873297 | 3.0049265 | 3341 |
| 1.9311526 | 3.8135975 | PROMOTEI         | 877.5399  | 1.7627076 | 3.3933438 | 862  |
| 2.1104107 | 4.318142  | DIVERGENT_PROMOT | 1.6325926 | 3.1006971 |           | 822  |
| 1.770337  | 3.4113363 | PROMOTEI         | 185.5578  |           |           |      |
| 2.4698498 | 5.5398611 | PROMOTEI         | 291.0928  | 2.275696  | 4.8423119 | 3737 |
| 2.409107  | 5.3114546 | PROMOTEI         | 455.2292  | 2.7602072 | 6.7749354 | 2002 |
| 1.8581426 | 3.6254061 | PROMOTEI         | 121.2498  | 1.4457483 | 2.7240408 | 2424 |
| 2.0582485 | 4.1648037 | PROMOTER         |           |           |           |      |
| 1.7720809 | 3.4154624 | DIVERGENT_PROMOT | 2.2994206 | 4.9226003 |           | 432  |
| 2.2675579 | 4.8150738 | PROMOTEI         | 260.51    | 1.5132871 | 2.854597  | 2220 |
| 1.8053901 | 3.4952366 | PROMOTER         |           | 1.6438197 | 3.124921  | 730  |
| 1.6264905 | 3.0876099 | PROMOTEI         | 110.3474  |           |           |      |
| 1.8079753 | 3.5015054 | PROMOTEI         | 462.3689  | 1.6601528 | 3.1605    | 2155 |
| 1.7662733 | 3.401741  | PROMOTER         |           | 1.3261954 | 2.5074056 | 3319 |
| 2.7696004 | 6.8191901 | PROMOTEI         | 399.862   | 1.9633394 | 3.8996358 | 3691 |
| 1.61943   | 3.0725362 | PROMOTEI         | 259.0963  | 1.1474885 | 2.2152791 | 4388 |
| 1.9692171 | 3.9155558 | PROMOTER         |           | 1.2733765 | 2.4172664 | 1815 |
| 1.7505423 | 3.3648502 | PROMOTEI         | 152.5419  | 1.7026792 | 3.2550489 | 4450 |
| 1.9155704 | 3.7726294 | PROMOTER         |           |           |           |      |
| 1.8215252 | 3.5345467 | PROMOTER         |           | 2.0322814 | 4.0905119 | 1602 |
| 1.9904017 | 3.9734762 | PROMOTEI         | 104.9005  | 1.6940008 | 3.2355272 | 2153 |
| 1.8747835 | 3.6674658 | DIVERGENT_PROMOT | 1.8721662 | 3.6608184 |           | 2900 |
| 1.6327347 | 3.1010025 | PROMOTEI         | 414.5686  | 1.3750913 | 2.5938433 | 4558 |
| 2.105434  | 4.3032719 | DIVERGENT_PROMOT | 1.7350596 | 3.3289325 |           | 1564 |
| 1.6419986 | 3.1209789 | PROMOTER         |           | 1.2880377 | 2.4419568 | 906  |
| 2.4474761 | 5.4546102 | PROMOTEI         | 856.8184  | 1.3389516 | 2.5296742 | 5325 |
| 2.2293649 | 4.689275  | DIVERGENT_PROMOT | 1.4797039 | 2.7889149 |           | 3392 |
| 2.3054624 | 4.9432587 | PROMOTEI         | 157.0523  | 2.027382  | 4.0766441 | 1331 |
| 1.8747174 | 3.6672977 | PROMOTEI         | 356.0156  |           |           |      |
| 1.7553743 | 3.376139  | PROMOTEI         | 134.2955  |           |           |      |
| 1.6398157 | 3.1162602 | PROMOTEI         | 493.8743  |           |           |      |
| 2.0503552 | 4.1420794 | DIVERGENT_PROMOT | 1.5015256 | 2.8314197 |           | 4013 |
| 2.1442373 | 4.420585  | DIVERGENT_PROMOT | 1.7886865 | 3.4550019 |           | 1455 |
| 2.0521698 | 4.1472925 | PROMOTER         | 1.4463884 | 2.7252497 |           | 1150 |

|           |           |                    |          |           |           |      |
|-----------|-----------|--------------------|----------|-----------|-----------|------|
| 1.8451988 | 3.5930246 | PROMOTEI           | 1364.937 | 1.98738   | 3.9651625 | 1071 |
| 1.8125255 | 3.5125664 | PROMOTEI           | 761.3904 | 1.9838799 | 3.9555544 | 1119 |
| 2.086676  | 4.2476827 | PROMOTEI           | 747.2343 | 1.9495628 | 3.8625746 | 3810 |
| 2.3367834 | 5.0517505 | PROMOTEI           | 142.2955 | 1.7547655 | 3.3747146 | 5230 |
| 1.685681  | 3.2169221 | PROMOTEI           | 187.4915 | 1.4042059 | 2.6467206 | 3686 |
| 1.9305847 | 3.8120967 | PROMOTEI           | 181.5549 | 1.4306551 | 2.6956909 | 3261 |
| 2.0544627 | 4.1538891 | PROMOTEI           | 497.157  | 1.9518002 | 3.8685695 | 616  |
| 2.0322058 | 4.0902976 | PROMOTEI           | 146.3199 | 1.7425661 | 3.3462984 | 4231 |
| 1.632563  | 3.1006335 | PROMOTEI           | 96.83876 | 1.7143557 | 3.2815006 | 1117 |
| 2.3176203 | 4.9850926 | PROMOTER           |          |           |           |      |
| 2.0126534 | 4.035237  | PROMOTEI           | 414.0583 | 1.7810779 | 3.4368286 | 431  |
| 1.8844901 | 3.692224  | PROMOTEI           | 366.1335 |           |           |      |
| 1.9494945 | 3.8623918 | DIVERGENT_PROMOTER |          |           |           |      |
| 1.7966301 | 3.4740779 | PROMOTER           |          | 1.5766195 | 2.9827013 | 2127 |
| 1.860785  | 3.6320524 | PROMOTEI           | 1325.502 | 1.530992  | 2.8898448 | 2037 |
| 1.8447729 | 3.591964  | PROMOTEI           | 1976.496 | 1.2403862 | 2.3626177 | 3707 |
| 1.6180902 | 3.0696841 | PROMOTER           |          |           |           |      |
| 1.904358  | 3.7434228 | PROMOTEI           | 1298.845 |           |           |      |
| 2.1010623 | 4.2902517 | PROMOTEI           | 472.6971 | 1.5411595 | 2.9102831 | 1102 |
| 1.93183   | 3.8153886 | PROMOTER           |          | 2.0527472 | 4.1489527 | 4455 |
| 1.7458705 | 3.3539717 | PROMOTEI           | 501.6178 |           |           |      |
| 2.3662827 | 5.1561088 | PROMOTEI           | 91.44313 | 1.6233501 | 3.0808962 | 5377 |
| 1.9444203 | 3.8488309 | DIVERGENT_PROMOT   |          | 1.6578774 | 3.1555192 | 5265 |
| 1.8236951 | 3.5398669 | PROMOTER           |          |           |           |      |
| 1.9327888 | 3.8179251 | PROMOTEI           | 550.7458 |           |           |      |
| 1.8738817 | 3.665174  | PROMOTEI           | 808.1059 | 1.938592  | 3.8333135 | 3241 |
| 1.9912015 | 3.9756796 | PROMOTEI           | 145.6355 | 1.8769641 | 3.6730132 | 1872 |
| 1.59564   | 3.0222856 | PROMOTEI           | 950.4133 |           |           |      |
| 2.018009  | 4.0502445 | PROMOTEI           | 134.8099 | 1.2883072 | 2.442413  | 3365 |
| 1.9404086 | 3.8381434 | PROMOTEI           | 256.775  |           |           |      |
| 1.8359005 | 3.5699417 | PROMOTEI           | 381.6726 | 1.5092928 | 2.8467046 | 3345 |
| 2.2439413 | 4.7368937 | PROMOTER           |          | 1.9162911 | 3.7745145 | 4402 |
| 1.897101  | 3.72464   | DIVERGENT_PROMOT   |          | 1.6838667 | 3.2128791 | 253  |
| 1.9853774 | 3.9596623 | PROMOTER           |          | 1.9312379 | 3.813823  | 2425 |
| 1.64388   | 3.1250516 | PROMOTEI           | 153.5457 |           |           |      |
| 1.9625034 | 3.8973767 | PROMOTEI           | 132.3911 | 1.6545224 | 3.1481895 | 2050 |
| 1.7112262 | 3.2743901 | DIVERGENT_PROMOT   |          | 1.6990765 | 3.2469305 | 996  |
| 2.0157156 | 4.0438111 | PROMOTEI           | 208.7015 |           |           |      |
| 1.9578645 | 3.8848651 | PROMOTER           |          | 1.1702775 | 2.2505498 | 3480 |
| 2.420674  | 5.354211  | PROMOTEI           | 165.2042 | 1.9326982 | 3.8176853 | 2811 |
| 1.7454946 | 3.3530979 | DIVERGENT_PROMOT   |          | 1.5232306 | 2.8743398 | 3617 |
| 1.8252827 | 3.5437644 | DIVERGENT_PROMOT   |          | 1.4856571 | 2.800447  | 4267 |
| 2.0855963 | 4.244505  | PROMOTER           |          | 1.6294035 | 3.0938505 | 4621 |
| 2.6822114 | 6.4183898 | PROMOTEI           | 434.8148 | 2.4855366 | 5.6004261 | 1904 |
| 1.5924945 | 3.0157033 | PROMOTEI           | 304.8611 |           |           |      |
| 1.915234  | 3.7717499 | PROMOTEI           | 319.1277 |           |           |      |
| 1.9989691 | 3.9971428 | PROMOTEI           | 272.8333 | 1.5467328 | 2.9215476 | 3679 |
| 1.9607483 | 3.8926383 | PROMOTER           |          |           |           |      |
| 2.0901303 | 4.2578653 | PROMOTER           |          | 2.1450024 | 4.42293   | 2560 |
| 1.6452088 | 3.1279312 | PROMOTER           |          | 1.4505899 | 2.7331979 | 2783 |
| 2.8014472 | 6.9713942 | PROMOTER           |          | 1.7415468 | 3.343935  | 3101 |
| 2.0533078 | 4.1505652 | DIVERGENT_PROMOTER |          |           |           |      |
| 1.5975099 | 3.0262054 | PROMOTEI           | 803.8351 | 1.8008037 | 3.4841427 | 4521 |
| 2.153185  | 4.448087  | DIVERGENT_PROMOT   |          | 1.6232122 | 3.0806018 | 5481 |
| 2.0937989 | 4.2687063 | PROMOTER           |          | 1.7828262 | 3.440996  | 1166 |
| 1.7383019 | 3.3364223 | PROMOTEI           | 411.1838 |           |           |      |
| 1.8340675 | 3.5654088 | PROMOTEI           | 134.8526 |           |           |      |
| 1.7131811 | 3.27883   | PROMOTER           |          | 2.0224302 | 4.0626757 | 2584 |

|           |           |                    |          |           |           |      |
|-----------|-----------|--------------------|----------|-----------|-----------|------|
| 1.8462038 | 3.5955284 | PROMOTER           |          |           |           |      |
| 1.8784982 | 3.6769211 | PROMOTEI           | 359.7066 |           |           |      |
| 1.9370757 | 3.8292868 | PROMOTEI           | 767.1488 | 2.3419304 | 5.0698055 | 16   |
| 1.8886971 | 3.7030065 | PROMOTEI           | 162.1998 | 1.497008  | 2.8225673 | 2633 |
| 2.6399302 | 6.2330151 | PROMOTEI           | 346.9359 | 1.4184984 | 2.6730714 | 5354 |
| 1.7092738 | 3.2699618 | PROMOTEI           | 608.384  | 1.5066748 | 2.8415435 | 4863 |
| 2.2846973 | 4.8726186 | PROMOTEI           | 129.6263 | 2.2839482 | 4.8700892 | 412  |
| 1.6486446 | 3.1353893 | PROMOTEI           | 325.3038 | 1.8726898 | 3.6621472 | 2897 |
| 1.9977582 | 3.9937892 | PROMOTER           |          |           |           |      |
| 1.7411578 | 3.3430335 | PROMOTEI           | 4872.564 |           |           |      |
| 2.164039  | 4.481678  | PROMOTEI           | 448.9347 |           |           |      |
| 2.1040723 | 4.2992121 | PROMOTEI           | 201.7275 | 1.6909225 | 3.2286309 | 2545 |
| 2.0192518 | 4.0537351 | PROMOTER           |          |           |           |      |
| 1.633706  | 3.103091  | DIVERGENT_PROMOT   |          | 1.6697344 | 3.1815602 | 4340 |
| 2.0297353 | 4.0832992 | PROMOTEI           | 263.1079 | 1.9507774 | 3.8658279 | 2454 |
| 1.9157293 | 3.773045  | PROMOTEI           | 1304.474 | 1.4676545 | 2.7657188 | 3223 |
| 1.932037  | 3.8159361 | PROMOTEI           | 159.0864 | 1.2670293 | 2.4066549 | 1661 |
| 1.9571224 | 3.8828673 | PROMOTEI           | 125.5498 |           |           |      |
| 1.677407  | 3.1985255 | PROMOTEI           | 130.4187 | 1.5904903 | 3.0115168 | 4365 |
| 1.9364277 | 3.8275672 | PROMOTEI           | 174.5659 |           |           |      |
| 1.976366  | 3.9350064 | PROMOTEI           | 2396.804 | 2.2903428 | 4.8917233 | 99   |
| 1.6665354 | 3.1745133 | PROMOTEI           | 151.627  | 1.3375362 | 2.5271936 | 3904 |
| 1.7011238 | 3.2515414 | DIVERGENT_PROMOT   |          | 2.0259492 | 4.0725974 | 606  |
| 1.9282858 | 3.806027  | PROMOTEI           | 189.8272 | 2.3125167 | 4.9674887 | 1416 |
| 1.8916603 | 3.7106201 | DIVERGENT_PROMOTER |          |           |           |      |
| 2.8927822 | 7.4270135 | PROMOTER           |          | 1.0614655 | 2.0870505 | 5585 |
| 1.8982867 | 3.7277024 | PROMOTER           |          | 2.094062  | 4.2694848 | 76   |
| 2.010318  | 4.0287101 | PROMOTEI           | 383.348  | 1.9577725 | 3.8846174 | 3380 |
| 1.7096734 | 3.2708677 | PROMOTER           |          |           |           |      |
| 2.7837508 | 6.8864039 | PROMOTEI           | 156.8373 | 2.1019144 | 4.2927864 | 5154 |
| 1.7011489 | 3.251598  | PROMOTEI           | 624.0067 | 1.9201059 | 3.7845084 | 1029 |
| 1.6495827 | 3.1374288 | PROMOTEI           | 318.9042 |           |           |      |
| 1.6515001 | 3.1416013 | PROMOTEI           | 367.1216 | 2.0893147 | 4.2554588 | 2309 |
| 1.8381395 | 3.5754864 | PROMOTEI           | 120.7922 |           |           |      |
| 2.039358  | 4.1106257 | PROMOTEI           | 3724.185 | 1.6228964 | 3.0799275 | 1280 |
| 1.8332684 | 3.5634345 | PROMOTER           |          | 1.8012292 | 3.4851704 | 3021 |
| 1.6551996 | 3.1496676 | PROMOTER           |          | 1.8439845 | 3.5900016 | 1824 |
| 2.1044488 | 4.3003343 | PROMOTER           |          |           |           |      |
| 1.9565638 | 3.8813642 | PROMOTEI           | 127.822  |           |           |      |
| 2.1608503 | 4.4717834 | PROMOTEI           | 4019.758 | 1.3464935 | 2.5429331 | 3423 |
| 2.2132068 | 4.6370484 | PROMOTEI           | 1988.908 |           |           |      |
| 1.9604952 | 3.8919555 | PROMOTER           |          | 1.6333996 | 3.102432  | 3431 |
| 2.0527039 | 4.1488281 | PROMOTEI           | 312.9589 | 1.9116869 | 3.7624878 | 4775 |
| 2.2245424 | 4.6736264 | PROMOTER           |          |           |           |      |
| 1.9704877 | 3.9190058 | PROMOTEI           | 287.1436 | 1.8214558 | 3.5343767 | 2166 |
| 2.3455157 | 5.0824203 | PROMOTEI           | 182.4404 | 1.1986567 | 2.2952586 | 3844 |
| 1.8043487 | 3.4927145 | PROMOTER           |          |           |           |      |
| 2.1747003 | 4.5149196 | PROMOTEI           | 1635.606 | 2.32408   | 5.0074635 | 408  |
| 1.6148489 | 3.0627952 | PROMOTEI           | 374.7208 |           |           |      |
| 1.8476733 | 3.5991926 | PROMOTEI           | 128.1499 | 1.7226828 | 3.3004959 | 3176 |
| 1.6967517 | 3.2417025 | PROMOTEI           | 261.4229 | 1.7699685 | 3.4104651 | 1997 |
| 1.7557672 | 3.3770586 | PROMOTER           |          | 1.7460508 | 3.3543909 | 3491 |
| 2.0529099 | 4.1494206 | PROMOTEI           | 158.2232 |           |           |      |
| 1.5876944 | 3.0056862 | PROMOTEI           | 112.6382 | 1.8542649 | 3.6156747 | 4674 |
| 1.886545  | 3.6974868 | DIVERGENT_PROMOT   |          | 1.7034606 | 3.2568124 | 2858 |
| 1.9618384 | 3.8955807 | PROMOTEI           | 118.4083 |           |           |      |
| 1.9379514 | 3.8316118 | PROMOTEI           | 870.1858 |           |           |      |
| 1.9558778 | 3.879519  | PROMOTEI           | 286.6361 | 2.1053016 | 4.302877  | 1894 |



|           |           |                    |          |           |           |      |
|-----------|-----------|--------------------|----------|-----------|-----------|------|
| 1.7656897 | 3.4003652 | PROMOTER           |          | 1.4248983 | 2.6849557 | 702  |
| 2.1841402 | 4.5445587 | PROMOTEI           | 120.1187 | 2.071759  | 4.2039893 | 5179 |
| 2.0225823 | 4.063104  | PROMOTER           |          | 1.4854426 | 2.8000306 | 3434 |
| 1.8963957 | 3.7228196 | PROMOTER           |          | 1.4941374 | 2.8169567 | 4219 |
| 1.690157  | 3.2269182 | PROMOTER           |          | 1.6841977 | 3.2136163 | 2530 |
| 2.3665113 | 5.1569258 | PROMOTER           |          | 1.3694552 | 2.5837298 | 3858 |
| 2.101421  | 4.2913186 | PROMOTEI           | 16913.88 | 1.8247603 | 3.5424815 | 1372 |
| 2.190186  | 4.5636432 | PROMOTEI           | 392.1223 | 1.5241828 | 2.8762375 | 1980 |
| 2.0437071 | 4.1230361 | PROMOTEI           | 1650.713 | 1.4443146 | 2.7213351 | 3002 |
| 1.9105581 | 3.7595451 | PROMOTEI           | 1546.323 |           |           |      |
| 1.6828958 | 3.2107176 | PROMOTEI           | 93.52377 | 2.4643157 | 5.5186512 | 1320 |
| 1.8476429 | 3.5991167 | PROMOTER           |          | 1.7850978 | 3.4464183 | 3023 |
| 1.9239291 | 3.7945508 | PROMOTER           |          | 1.8652643 | 3.6433467 | 4896 |
| 2.2209308 | 4.6619412 | PROMOTEI           | 2604.671 | 1.6590095 | 3.1579963 | 1807 |
| 1.5977932 | 3.0267997 | PROMOTEI           | 444.5523 | 1.4441259 | 2.7209791 | 2935 |
| 1.7658725 | 3.4007961 | PROMOTER           |          |           |           |      |
| 1.7605938 | 3.3883756 | DIVERGENT_PROMOT   |          | 1.9126439 | 3.7649844 | 3087 |
| 1.5919237 | 3.0145104 | PROMOTEI           | 151.7981 |           |           |      |
| 1.7073509 | 3.2656064 | PROMOTEI           | 170.7892 | 1.9997877 | 3.9994114 | 1676 |
| 2.3392696 | 5.0604637 | PROMOTER           |          |           |           |      |
| 2.3186219 | 4.9885547 | DIVERGENT_PROMOT   |          | 1.4076858 | 2.6531124 | 2045 |
| 2.1737444 | 4.5119291 | PROMOTER           |          |           |           |      |
| 1.8859249 | 3.6958979 | PROMOTER           |          | 1.6330512 | 3.1016829 | 733  |
| 2.2711942 | 4.8272254 | PROMOTEI           | 93.73696 | 1.8391806 | 3.5780675 | 2891 |
| 1.8345048 | 3.5664897 | PROMOTER           |          |           |           |      |
| 2.2183895 | 4.6537364 | PROMOTER           |          | 2.271549  | 4.8284127 | 1262 |
| 1.7558808 | 3.3773245 | PROMOTEI           | 256.8543 |           |           |      |
| 1.6740448 | 3.1910801 | PROMOTER           |          | 0.9125247 | 1.8823367 | 5341 |
| 1.6893998 | 3.2252225 | PROMOTEI           | 2320.963 | 1.6187855 | 3.0711639 | 4068 |
| 1.9153174 | 3.7719679 | PROMOTEI           | 996.6646 |           |           |      |
| 1.9853734 | 3.9596513 | PROMOTER           |          |           |           |      |
| 2.271888  | 4.8295474 | PROMOTEI           | 182.0018 |           |           |      |
| 2.2332218 | 4.7018281 | PROMOTEI           | 238.3416 | 1.7115802 | 3.2751936 | 1173 |
| 1.7783033 | 3.4302252 | PROMOTER           |          | 1.5265051 | 2.8808711 | 2506 |
| 1.8490496 | 3.6026278 | PROMOTEI           | 1157.79  |           |           |      |
| 2.349677  | 5.0971012 | PROMOTEI           | 192.5159 | 1.6940271 | 3.2355862 | 3742 |
| 1.9624784 | 3.8973092 | DIVERGENT_PROMOT   |          | 1.5505624 | 2.9293131 | 4710 |
| 1.7534238 | 3.3715776 | PROMOTEI           | 214.5584 | 2.1404858 | 4.4091049 | 2844 |
| 1.9944589 | 3.9846663 | PROMOTEI           | 443.6686 |           |           |      |
| 1.8618171 | 3.6346516 | DIVERGENT_PROMOTER |          |           |           |      |
| 2.0760698 | 4.2165697 | DIVERGENT_PROMOTER |          |           |           |      |
| 1.7063444 | 3.2633289 | PROMOTER           |          |           |           |      |
| 1.7788516 | 3.4315291 | PROMOTER           |          | 1.8800826 | 3.6809613 | 5003 |
| 1.9637512 | 3.9007491 | PROMOTER           |          | 1.9891434 | 3.9700121 | 2907 |
| 2.3324733 | 5.0366808 | PROMOTER           |          |           |           |      |
| 2.5683262 | 5.931209  | PROMOTEI           | 93.63394 |           |           |      |
| 1.8485779 | 3.6014501 | PROMOTER           |          | 1.8085492 | 3.5028985 | 5331 |
| 1.7714704 | 3.4140174 | PROMOTER           |          | 1.8228363 | 3.5377603 | 1425 |
| 1.7644371 | 3.3974142 | PROMOTEI           | 1344.3   | 1.3158461 | 2.4894829 | 3376 |
| 2.3361561 | 5.0495545 | PROMOTEI           | 177.5311 | 1.7359939 | 3.331089  | 3097 |
| 1.6511142 | 3.1407611 | PROMOTEI           | 153.2033 |           |           |      |
| 1.8382316 | 3.5757146 | DIVERGENT_PROMOT   |          | 1.7049423 | 3.2601589 | 2230 |
| 2.1826222 | 4.5397794 | PROMOTEI           | 128.1647 | 1.3170005 | 2.4914757 | 4525 |
| 2.1144447 | 4.3302331 | PROMOTER           |          | 2.0241559 | 4.0675382 | 3386 |
| 1.88554   | 3.694912  | PROMOTEI           | 451.1117 | 1.5404992 | 2.9089514 | 2526 |
| 2.2155907 | 4.644717  | PROMOTEI           | 299.8295 |           |           |      |
| 1.7312906 | 3.3202471 | PROMOTEI           | 322.3008 | 2.2897413 | 4.8896842 | 985  |
| 1.9711564 | 3.9208227 | PROMOTEI           | 122.4637 | 2.0415447 | 4.1168609 | 1192 |

|           |           |                  |           |           |           |      |
|-----------|-----------|------------------|-----------|-----------|-----------|------|
| 2.4280539 | 5.3816699 | PROMOTEI         | 1519.958  |           |           |      |
| 1.7231381 | 3.3015377 | DIVERGENT_PROMOT | 1.3550438 | 2.5580488 |           | 3661 |
| 1.6766692 | 3.1968902 | PROMOTEI         | 484.9438  |           |           |      |
| 1.8498455 | 3.6046158 | PROMOTEI         | 312.8405  | 1.205491  | 2.3061574 | 3262 |
| 1.7607623 | 3.3887714 | PROMOTEI         | 361.4875  | 1.7684596 | 3.4069    | 1851 |
| 1.8370289 | 3.572735  | PROMOTEI         | 91.82077  | 2.0560424 | 4.15844   | 2683 |
| 1.6181062 | 3.0697182 | PROMOTER         |           | 1.417968  | 2.6720889 | 3772 |
| 2.4225092 | 5.3610263 | PROMOTER         |           | 1.9848269 | 3.9581517 | 1112 |
| 1.6840085 | 3.2131949 | PROMOTER         |           | 1.335609  | 2.52382   | 5301 |
| 1.7086235 | 3.2684882 | DIVERGENT_PROMOT | 1.7611756 | 3.3897423 |           | 1450 |
| 1.834721  | 3.5670242 | PROMOTEI         | 430.769   |           |           |      |
| 2.3257077 | 5.0131163 | PROMOTEI         | 2166.887  | 1.6864939 | 3.2187352 | 5080 |
| 2.0987942 | 4.2835122 | DIVERGENT_PROMOT | 2.3016965 | 4.930372  |           | 3773 |
| 1.9145411 | 3.7699388 | PROMOTEI         | 3633.866  | 1.5376463 | 2.9032047 | 1911 |
| 2.0896044 | 4.2563135 | DIVERGENT_PROMOT | 1.657466  | 3.1546195 |           | 5452 |

Normalized Normalized Type transcript in Normalized Normalized Rank (P2-12H\_R1R2)

|           |           |                    |           |           |           |      |
|-----------|-----------|--------------------|-----------|-----------|-----------|------|
| 2.1300607 | 4.377359  | DIVERGENT_PROMOTER |           |           |           |      |
| 2.279506  | 4.8551168 | PROMOTEI           | 1053.575  | 1.978181  | 3.93996   | 994  |
| 2.1387372 | 4.4037641 | DIVERGENT_PROMOTER |           |           |           |      |
| 2.552855  | 5.8679436 | PROMOTEI           | 534.934   | 1.8496319 | 3.6040822 | 4430 |
| 2.05145   | 4.1452238 | PROMOTEI           | 1423.852  | 1.6702957 | 3.1827982 | 505  |
| 2.0201933 | 4.0563814 | PROMOTEI           | 145.7914  |           |           |      |
| 2.0142276 | 4.0396424 | DIVERGENT_PROMOT   | 1.477288  | 2.7842485 |           | 2019 |
| 2.4995763 | 5.6551932 | PROMOTER           |           | 1.7349987 | 3.3287919 | 3651 |
| 2.5324566 | 5.78556   | PROMOTER           |           | 1.3106763 | 2.480578  | 5071 |
| 2.2252655 | 4.6759694 | PROMOTER           |           | 2.058988  | 4.1669391 | 240  |
| 2.0643847 | 4.1825555 | PROMOTEI           | 868.885   |           |           |      |
| 1.6926153 | 3.2324214 | PROMOTER           |           | 1.2636502 | 2.4010246 | 5435 |
| 1.9570122 | 3.8825707 | PROMOTEI           | 1482.15   | 1.840834  | 3.5821705 | 377  |
| 2.2228916 | 4.6682816 | PROMOTEI           | 344.2707  | 2.0906034 | 4.2592618 | 1529 |
| 1.7438751 | 3.349336  | PROMOTEI           | 417.119   |           |           |      |
| 2.8041213 | 6.9843279 | PROMOTEI           | 1289.532  | 1.7944546 | 3.4688431 | 1978 |
| 2.645024  | 6.2550612 | DIVERGENT_PROMOTER |           |           |           |      |
| 2.4298346 | 5.3883165 | PROMOTEI           | 2458.488  |           |           |      |
| 1.7745047 | 3.4212053 | PROMOTER           |           | 1.0620449 | 2.0878888 | 2798 |
| 1.9805658 | 3.9464783 | PROMOTER           |           |           |           |      |
| 2.3948185 | 5.2591094 | PROMOTER           |           |           |           |      |
| 2.1170778 | 4.3381436 | PROMOTEI           | 115.3841  |           |           |      |
| 2.1790073 | 4.5284185 | PROMOTEI           | 987.1461  | 1.4211596 | 2.6780068 | 3629 |
| 1.924246  | 3.7953844 | PROMOTEI           | 271.5389  | 1.9958067 | 3.9883906 | 1816 |
| 1.9810836 | 3.9478949 | PROMOTEI           | 123.3108  |           |           |      |
| 2.6637318 | 6.3367004 | PROMOTER           |           |           |           |      |
| 1.9733677 | 3.926837  | PROMOTER           |           | 1.5064135 | 2.8410289 | 5348 |
| 2.484287  | 5.5955774 | DIVERGENT_PROMOT   | 2.0693464 | 4.1969649 |           | 2388 |
| 2.0901403 | 4.2578948 | PROMOTEI           | 102.6696  |           |           |      |
| 2.8200924 | 7.0620763 | PROMOTEI           | 894.2858  |           |           |      |
| 2.3679638 | 5.1621204 | PROMOTER           |           |           |           |      |
| 1.8583065 | 3.625818  | PROMOTEI           | 681.3087  | 1.5986142 | 3.0285226 | 4570 |
| 2.1247973 | 4.3614181 | PROMOTER           |           | 2.0106018 | 4.0295027 | 3350 |
| 1.9872185 | 3.9647187 | PROMOTEI           | 123.9818  | 1.8557384 | 3.6193695 | 2612 |
| 1.9211835 | 3.7873362 | PROMOTEI           | 1092.204  | 1.997358  | 3.9926815 | 1058 |
| 2.2249358 | 4.674901  | PROMOTEI           | 411.525   | 1.9800519 | 3.9450727 | 3471 |
| 1.7167555 | 3.2869636 | PROMOTEI           | 350.0916  |           |           |      |
| 2.2743294 | 4.8377271 | DIVERGENT_PROMOT   | 1.7048966 | 3.2600557 |           | 2782 |
| 2.0843446 | 4.240824  | PROMOTEI           | 204.1715  | 1.9246346 | 3.7964068 | 2177 |

|           |           |                    |          |           |           |      |
|-----------|-----------|--------------------|----------|-----------|-----------|------|
| 2.021028  | 4.058729  | PROMOTEI           | 2696.021 | 1.6254013 | 3.0852797 | 2118 |
| 1.9882653 | 3.9675965 | DIVERGENT_PROMOTER |          |           |           |      |
| 2.585788  | 6.0034341 | PROMOTEI           | 2598.324 | 2.274624  | 4.8387151 | 61   |
| 1.6458677 | 3.1293601 | PROMOTEI           | 388.1238 |           |           |      |
| 2.0584774 | 4.1654646 | PROMOTEI           | 766.7198 | 1.619489  | 3.0726618 | 5448 |
| 1.7003062 | 3.2496992 | PROMOTER           |          | 1.338232  | 2.5284128 | 5506 |
| 2.5847464 | 5.9991013 | PROMOTER           |          |           |           |      |
| 2.3496664 | 5.0970638 | PROMOTER           |          | 1.1029694 | 2.1479634 | 4417 |
| 2.2494013 | 4.7548548 | PROMOTEI           | 1239.06  |           |           |      |
| 2.0407262 | 4.1145259 | PROMOTER           |          |           |           |      |
| 2.9951088 | 7.9729234 | PROMOTER           |          |           |           |      |
| 1.9877515 | 3.9661837 | PROMOTER           |          | 1.9934384 | 3.9818487 | 2785 |
| 2.2173064 | 4.6502439 | DIVERGENT_PROMOTER |          |           |           |      |
| 1.8334583 | 3.5639036 | PROMOTEI           | 999.4857 | 1.3966892 | 2.6329666 | 4400 |
| 1.9626466 | 3.8977636 | PROMOTEI           | 609.1555 | 1.3039881 | 2.4691048 | 3917 |
| 2.4134316 | 5.3274    | PROMOTEI           | 206.721  |           |           |      |
| 1.6913077 | 3.229493  | PROMOTER           |          |           |           |      |
| 2.0080347 | 4.0223391 | PROMOTEI           | 2410.746 | 2.047376  | 4.1335347 | 975  |
| 1.8488202 | 3.602055  | PROMOTER           |          |           |           |      |
| 2.111553  | 4.3215624 | PROMOTER           |          |           |           |      |
| 2.1810403 | 4.5348043 | PROMOTEI           | 662.8675 | 1.7593958 | 3.3855631 | 5340 |
| 2.3770888 | 5.1948742 | PROMOTEI           | 409.3607 | 1.7611887 | 3.3897731 | 2135 |
| 1.6296066 | 3.0942861 | PROMOTEI           | 98.91907 |           |           |      |
| 1.9737152 | 3.9277829 | PROMOTER           |          | 1.7952075 | 3.4706539 | 2081 |
| 2.0888093 | 4.2539684 | PROMOTEI           | 192.5876 | 1.3201048 | 2.4968425 | 4931 |
| 1.810307  | 3.5071691 | PROMOTEI           | 152.536  |           |           |      |
| 1.9106247 | 3.7597186 | PROMOTER           |          | 1.9282856 | 3.8060265 | 3857 |
| 1.8908136 | 3.708443  | PROMOTEI           | 1781.952 | 2.1940289 | 4.5758156 | 620  |
| 1.753499  | 3.3717533 | DIVERGENT_PROMOTER |          |           |           |      |
| 2.6333318 | 6.2045725 | DIVERGENT_PROMOT   |          | 2.2099848 | 4.626704  | 280  |
| 1.89033   | 3.7072001 | PROMOTEI           | 97.24357 |           |           |      |
| 2.661183  | 6.3255152 | PROMOTEI           | 211.2793 | 1.5617974 | 2.9522142 | 4175 |
| 2.2110558 | 4.6301399 | PROMOTEI           | 1149.841 |           |           |      |
| 1.7570801 | 3.3801332 | PROMOTER           |          | 1.4637122 | 2.7581716 | 4606 |
| 2.1974657 | 4.5867291 | DIVERGENT_PROMOT   |          | 1.6135114 | 3.059957  | 655  |
| 2.4179263 | 5.3440233 | PROMOTER           |          |           |           |      |
| 1.7494273 | 3.3622507 | PROMOTEI           | 819.6301 | 1.524933  | 2.8777335 | 1241 |
| 1.6785543 | 3.2010702 | PROMOTEI           | 413.4667 | 1.5128331 | 2.8536989 | 3457 |
| 1.8660681 | 3.6453772 | PROMOTER           |          | 2.0773714 | 4.2203756 | 2850 |
| 1.5887705 | 3.007929  | PROMOTEI           | 328.0329 | 1.3836937 | 2.6093558 | 3886 |
| 2.147825  | 4.4315918 | DIVERGENT_PROMOT   |          | 1.8551263 | 3.6178342 | 4391 |
| 2.4012794 | 5.2827143 | PROMOTEI           | 569.4477 | 1.2988789 | 2.4603762 | 2885 |
| 2.6965804 | 6.4826352 | PROMOTER           |          |           |           |      |
| 2.2585342 | 4.7850507 | PROMOTEI           | 327.6436 |           |           |      |
| 2.433803  | 5.4031585 | DIVERGENT_PROMOTER |          |           |           |      |
| 1.6594208 | 3.1588968 | PROMOTEI           | 914.6683 | 1.4674675 | 2.7653604 | 4138 |
| 2.3094132 | 4.9568143 | PROMOTEI           | 774.1631 | 1.6858773 | 3.2173598 | 4561 |
| 2.2132154 | 4.6370761 | PROMOTEI           | 674.3591 | 1.60267   | 3.0370486 | 5369 |
| 1.888247  | 3.7018514 | PROMOTEI           | 418.7185 |           |           |      |
| 1.767004  | 3.4034644 | PROMOTER           |          | 1.6430535 | 3.1232618 | 5380 |
| 1.6655346 | 3.1723118 | DIVERGENT_PROMOTER |          |           |           |      |
| 1.6669692 | 3.1754679 | PROMOTEI           | 825.2838 | 1.5161879 | 2.8603425 | 815  |
| 1.9303175 | 3.8113907 | DIVERGENT_PROMOT   |          | 1.9420676 | 3.8425595 | 4509 |
| 1.7047625 | 3.2597527 | DIVERGENT_PROMOT   |          | 1.3650272 | 2.5758118 | 3219 |
| 2.3335612 | 5.0404803 | PROMOTEI           | 440.9583 |           |           |      |
| 1.6400697 | 3.1168089 | PROMOTEI           | 1256.795 |           |           |      |
| 1.5895512 | 3.0095571 | DIVERGENT_PROMOTER |          |           |           |      |
| 1.7003942 | 3.2498975 | PROMOTER           |          | 1.6320825 | 3.099601  | 2523 |

|           |           |                    |           |           |           |      |
|-----------|-----------|--------------------|-----------|-----------|-----------|------|
| 1.8312379 | 3.5584227 | PROMOTEI           | 89.27377  | 1.2218577 | 2.3324687 | 4390 |
| 1.6678051 | 3.1773083 | PROMOTEI           | 4231.536  |           |           |      |
| 1.7996724 | 3.4814116 | PROMOTEI           | 677.9791  |           |           |      |
| 2.2739832 | 4.8365664 | PROMOTEI           | 607.2963  |           |           |      |
| 1.827293  | 3.5487059 | PROMOTEI           | 1398.088  |           |           |      |
| 1.8636091 | 3.6391691 | PROMOTEI           | 484.3943  |           |           |      |
| 2.4075208 | 5.305618  | DIVERGENT_PROMOTER |           |           |           |      |
| 1.9369453 | 3.8289407 | PROMOTEI           | 1997.909  |           |           |      |
| 1.6614189 | 3.1632748 | DIVERGENT_PROMOT   | 1.5629872 | 2.9546499 |           | 5374 |
| 1.9674801 | 3.9108443 | PROMOTER           | 1.4277089 | 2.6901915 |           | 3607 |
| 1.8880248 | 3.7012813 | PROMOTEI           | 344.3292  | 0.9856066 | 1.9801456 | 4974 |
| 1.8016452 | 3.4861755 | DIVERGENT_PROMOTER |           |           |           |      |
| 1.6951047 | 3.2380038 | PROMOTEI           | 182.3857  |           |           |      |
| 2.0537128 | 4.1517305 | PROMOTER           | 2.0810332 | 4.2311012 |           | 3716 |
| 2.6609335 | 6.3244214 | PROMOTEI           | 2092.104  | 1.5484041 | 2.9249341 | 3154 |
| 2.0857768 | 4.245036  | PROMOTEI           | 568.187   |           |           |      |
| 2.5010858 | 5.6611133 | PROMOTEI           | 379.3467  | 1.0763432 | 2.1086844 | 2455 |
| 2.311867  | 4.9652522 | DIVERGENT_PROMOTER |           |           |           |      |
| 2.1165092 | 4.3364341 | PROMOTEI           | 418.3998  |           |           |      |
| 2.2556036 | 4.7753405 | PROMOTEI           | 99.71265  |           |           |      |
| 2.0232024 | 4.0648508 | DIVERGENT_PROMOTER |           |           |           |      |
| 2.216432  | 4.6474263 | PROMOTEI           | 237.5534  |           |           |      |
| 2.0285265 | 4.0798794 | PROMOTER           |           |           |           |      |
| 2.575158  | 5.9593625 | PROMOTEI           | 376.7094  | 1.8630177 | 3.6376776 | 2541 |
| 2.4096127 | 5.3133167 | PROMOTEI           | 616.6323  |           |           |      |
| 1.7311912 | 3.3200183 | PROMOTEI           | 122.1474  |           |           |      |
| 1.92406   | 3.7948951 | PROMOTEI           | 150.5013  | 1.614256  | 3.0615367 | 3674 |
| 1.7358109 | 3.3306665 | PROMOTEI           | 1883.163  |           |           |      |
| 1.9647645 | 3.9034898 | PROMOTEI           | 435.5381  |           |           |      |
| 2.5762715 | 5.9639638 | PROMOTEI           | 312.6628  |           |           |      |
| 1.862063  | 3.6352712 | PROMOTEI           | 1090.774  |           |           |      |
| 2.4340932 | 5.4042454 | PROMOTEI           | 531.3867  | 1.621119  | 3.0761354 | 1694 |
| 1.809461  | 3.5051131 | PROMOTEI           | 2029.283  |           |           |      |
| 1.8458098 | 3.5945466 | DIVERGENT_PROMOTER |           |           |           |      |
| 1.8695418 | 3.6541651 | PROMOTEI           | 642.5056  |           |           |      |
| 2.0446608 | 4.1257626 | PROMOTEI           | 230.8669  |           |           |      |
| 2.0561323 | 4.1586991 | PROMOTEI           | 462.6407  |           |           |      |
| 1.8659753 | 3.6451427 | PROMOTEI           | 685.5911  | 1.9626331 | 3.8977271 | 1256 |
| 1.698707  | 3.246099  | PROMOTEI           | 953.5919  |           |           |      |
| 2.1036751 | 4.2980287 | PROMOTER           | 2.014245  | 4.0396912 |           | 3864 |
| 2.1741662 | 4.5132485 | DIVERGENT_PROMOTER |           |           |           |      |
| 1.968468  | 3.9135232 | PROMOTER           | 2.089394  | 4.2556928 |           | 850  |
| 2.2667012 | 4.8122153 | DIVERGENT_PROMOT   | 1.8514464 | 3.6086179 |           | 1106 |
| 1.8434628 | 3.5887037 | PROMOTER           |           |           |           |      |
| 2.0435116 | 4.1224774 | PROMOTEI           | 122.7166  |           |           |      |
| 1.9128602 | 3.765549  | PROMOTER           |           |           |           |      |
| 1.8982663 | 3.7276497 | PROMOTER           | 2.2906551 | 4.8927823 |           | 49   |
| 2.4309087 | 5.3923297 | PROMOTEI           | 259.2986  |           |           |      |
| 2.5084898 | 5.6902412 | PROMOTER           |           |           |           |      |
| 2.7608893 | 6.7781394 | PROMOTEI           | 650.0453  |           |           |      |
| 1.6232364 | 3.0806535 | DIVERGENT_PROMOT   | 1.1852815 | 2.2740776 |           | 3218 |
| 2.1031559 | 4.2964821 | PROMOTER           |           |           |           |      |
| 2.261272  | 4.7941399 | PROMOTEI           | 1847.058  |           |           |      |
| 2.2104397 | 4.6281631 | PROMOTER           |           |           |           |      |
| 2.285308  | 4.8746816 | PROMOTER           |           |           |           |      |
| 1.8120184 | 3.511332  | PROMOTER           |           |           |           |      |
| 2.1651375 | 4.4850918 | PROMOTEI           | 671.8309  | 1.6096247 | 3.0517244 | 2229 |
| 2.0572    | 4.161778  | PROMOTEI           | 167.9782  |           |           |      |

|           |           |                    |           |           |           |      |  |
|-----------|-----------|--------------------|-----------|-----------|-----------|------|--|
| 1.8111867 | 3.5093083 | PROMOTEI           | 1852.264  |           |           |      |  |
| 2.2759604 | 4.8431994 | PROMOTEI           | 490.3866  | 1.6938735 | 3.2352417 | 3736 |  |
| 1.5924752 | 3.015663  | PROMOTEI           | 158.4037  |           |           |      |  |
| 2.2776546 | 4.8488902 | PROMOTER           |           |           |           |      |  |
| 1.635245  | 3.106403  | DIVERGENT_PROMOTER |           |           |           |      |  |
| 1.7199047 | 3.2941465 | PROMOTEI           | 141.7252  |           |           |      |  |
| 2.6685224 | 6.3577769 | PROMOTEI           | 147.2379  |           |           |      |  |
| 2.1636348 | 4.4804226 | PROMOTEI           | 245.2751  | 2.1557622 | 4.4560401 | 1721 |  |
| 1.9798905 | 3.9446314 | PROMOTEI           | 636.9106  | 1.5528826 | 2.9340279 | 5254 |  |
| 1.7237933 | 3.3030374 | DIVERGENT_PROMOT   | 1.4680436 | 2.7664649 |           | 4503 |  |
| 2.129893  | 4.3768502 | PROMOTEI           | 494.0068  | 1.0764945 | 2.1089056 | 3894 |  |
| 1.7117057 | 3.2754785 | PROMOTER           |           |           |           |      |  |
| 1.9703989 | 3.9187646 | PROMOTER           |           | 1.7560343 | 3.3776839 | 3733 |  |
| 2.2684922 | 4.8181931 | DIVERGENT_PROMOT   | 2.1420968 | 4.4140311 |           | 380  |  |
| 2.063219  | 4.1791774 | DIVERGENT_PROMOTER |           |           |           |      |  |
| 2.3652742 | 5.1525057 | DIVERGENT_PROMOTER |           |           |           |      |  |
| 2.7523456 | 6.7381176 | PROMOTEI           | 4838.691  | 1.5195967 | 2.8671089 | 4661 |  |
| 1.6335863 | 3.1028335 | DIVERGENT_PROMOTER |           |           |           |      |  |
| 1.828782  | 3.5523704 | PROMOTEI           | 394.6784  |           |           |      |  |
| 2.7294688 | 6.632114  | PROMOTEI           | 212.9776  |           |           |      |  |
| 1.889784  | 3.7057974 | PROMOTER           |           |           |           |      |  |
| 1.6012653 | 3.034093  | PROMOTEI           | 94.88509  |           |           |      |  |
| 2.1210155 | 4.3500003 | PROMOTEI           | 2119.854  | 2.1023695 | 4.2941408 | 860  |  |
| 1.6920582 | 3.2311735 | PROMOTER           |           | 1.96813   | 3.9126064 | 2913 |  |
| 2.3064182 | 4.9465347 | PROMOTEI           | 265.2573  |           |           |      |  |
| 2.3298798 | 5.0276346 | PROMOTEI           | 4257.365  | 1.9357342 | 3.8257277 | 1965 |  |
| 1.7676477 | 3.4049832 | PROMOTEI           | 298.2318  |           |           |      |  |
| 1.9849396 | 3.9584609 | PROMOTEI           | 1372.278  |           |           |      |  |
| 1.6978567 | 3.2441864 | PROMOTEI           | 302.7046  |           |           |      |  |
| 2.1871908 | 4.5541784 | PROMOTER           |           | 1.8552068 | 3.6180361 | 4168 |  |
| 2.0948927 | 4.2719439 | PROMOTER           |           |           |           |      |  |
| 1.8556886 | 3.6192446 | PROMOTEI           | 149.7237  |           |           |      |  |
| 1.8678575 | 3.6499014 | DIVERGENT_PROMOT   | 1.7708591 | 3.4125711 |           | 3121 |  |
| 2.1231508 | 4.3564434 | PROMOTEI           | 159.2886  | 0.8899112 | 1.8530621 | 5045 |  |
| 2.344361  | 5.0783541 | PROMOTEI           | 160.5789  |           |           |      |  |
| 2.1718314 | 4.5059503 | PROMOTEI           | 620.0839  |           |           |      |  |
| 2.0846353 | 4.2416786 | PROMOTER           |           |           |           |      |  |
| 1.725137  | 3.3061152 | DIVERGENT_PROMOTER |           |           |           |      |  |
| 1.7561646 | 3.3779889 | PROMOTEI           | 109.6729  |           |           |      |  |
| 1.6942414 | 3.2360668 | PROMOTEI           | 948.3173  | 1.2574838 | 2.390784  | 5164 |  |
| 1.7002376 | 3.2495447 | PROMOTEI           | 494.695   |           |           |      |  |
| 2.2066176 | 4.615918  | PROMOTER           |           |           |           |      |  |
| 2.3379846 | 5.0559584 | PROMOTEI           | 660.6837  |           |           |      |  |
| 1.7307638 | 3.3190349 | DIVERGENT_PROMOTER |           |           |           |      |  |
| 2.2613602 | 4.794433  | PROMOTEI           | 181.4277  |           |           |      |  |
| 2.354381  | 5.1137478 | DIVERGENT_PROMOTER |           |           |           |      |  |
| 2.087298  | 4.2495144 | PROMOTEI           | 139.5818  |           |           |      |  |
| 2.1428804 | 4.4164292 | PROMOTER           |           |           |           |      |  |
| 2.4807146 | 5.5817387 | PROMOTEI           | 244.2557  |           |           |      |  |
| 1.9689176 | 3.914743  | PROMOTER           |           |           |           |      |  |
| 2.1030836 | 4.2962668 | PROMOTER           |           | 1.7140083 | 3.2807105 | 3895 |  |
| 1.7870587 | 3.4511058 | PROMOTEI           | 517.0087  | 1.2858156 | 2.4381985 | 4850 |  |
| 1.8157685 | 3.5204711 | PROMOTER           |           | 1.43372   | 2.7014238 | 4560 |  |
| 2.3137434 | 4.9717143 | DIVERGENT_PROMOT   | 1.4930035 | 2.8147436 |           | 4283 |  |
| 1.9139699 | 3.7684465 | PROMOTEI           | 108.4561  |           |           |      |  |
| 2.4570434 | 5.4909029 | PROMOTEI           | 125.3625  | 1.7773571 | 3.4279762 | 5225 |  |
| 1.8437072 | 3.5893117 | PROMOTEI           | 224.435   |           |           |      |  |
| 1.7612138 | 3.3898321 | DIVERGENT_PROMOT   | 2.1356366 | 4.3943098 |           | 2409 |  |

|           |           |                    |           |           |           |      |  |
|-----------|-----------|--------------------|-----------|-----------|-----------|------|--|
| 1.6853777 | 3.2162459 | PROMOTEI           | 611.0683  |           |           |      |  |
| 1.653116  | 3.145122  | DIVERGENT_PROMOT   | 1.4989774 | 2.826423  |           | 3768 |  |
| 1.8466885 | 3.5967366 | PROMOTER           |           |           |           |      |  |
| 1.7283553 | 3.3134986 | PROMOTEI           | 1237.076  |           |           |      |  |
| 1.7998997 | 3.4819602 | PROMOTER           |           |           |           |      |  |
| 1.8142078 | 3.5166647 | DIVERGENT_PROMOTER |           |           |           |      |  |
| 1.5963798 | 3.0238358 | PROMOTEI           | 964.0632  | 1.6766148 | 3.1967697 | 4247 |  |
| 1.606199  | 3.0444867 | PROMOTEI           | 140.0532  |           |           |      |  |
| 2.2743948 | 4.8379464 | PROMOTEI           | 159.6487  | 1.3523049 | 2.5531971 | 4258 |  |
| 2.8830538 | 7.3771    | DIVERGENT_PROMOTER |           |           |           |      |  |
| 2.26969   | 4.822195  | PROMOTEI           | 2128.096  |           |           |      |  |
| 1.7517956 | 3.3677746 | PROMOTER           |           |           |           |      |  |
| 1.6585984 | 3.1570966 | PROMOTER           |           |           |           |      |  |
| 2.3265011 | 5.015874  | PROMOTER           |           |           |           |      |  |
| 1.6032203 | 3.0382073 | PROMOTEI           | 195.0697  |           |           |      |  |
| 1.9657056 | 3.906037  | PROMOTEI           | 691.8871  |           |           |      |  |
| 1.8794733 | 3.6794071 | PROMOTEI           | 198.2952  |           |           |      |  |
| 1.8528398 | 3.6121049 | PROMOTEI           | 109.0906  | 1.6379238 | 3.1121763 | 2577 |  |
| 1.9609987 | 3.893314  | PROMOTEI           | 4233.088  | 2.378524  | 5.2000446 | 1690 |  |
| 1.8908046 | 3.7084199 | PROMOTEI           | 6915.497  | 1.5279955 | 2.8838487 | 1896 |  |
| 2.2561388 | 4.7771123 | PROMOTEI           | 279.7865  | 1.3431932 | 2.5371225 | 3030 |  |
| 1.8297632 | 3.5547872 | PROMOTEI           | 256.8216  |           |           |      |  |
| 2.4074175 | 5.3052381 | PROMOTEI           | 314.2263  | 1.7523028 | 3.3689588 | 2883 |  |
| 1.9679035 | 3.9119922 | PROMOTEI           | 275.277   |           |           |      |  |
| 1.6162294 | 3.0657274 | DIVERGENT_PROMOTER |           |           |           |      |  |
| 2.2820501 | 4.863686  | PROMOTER           |           |           |           |      |  |
| 2.018118  | 4.0505505 | PROMOTER           |           | 1.5247527 | 2.8773739 | 4492 |  |
| 2.0522287 | 4.1474618 | PROMOTEI           | 262.1652  | 1.5982536 | 3.0277658 | 2017 |  |
| 2.3103087 | 4.959892  | PROMOTER           |           | 1.3652769 | 2.5762577 | 1601 |  |
| 2.232282  | 4.6987663 | PROMOTEI           | 1550.677  |           |           |      |  |
| 1.6942997 | 3.2361976 | PROMOTEI           | 2056.127  | 1.7640607 | 3.3965279 | 115  |  |
| 2.5229526 | 5.7475719 | DIVERGENT_PROMOT   | 1.7033197 | 3.2564943 |           | 1151 |  |
| 1.7060987 | 3.2627732 | PROMOTEI           | 1471.481  |           |           |      |  |
| 2.3652754 | 5.15251   | DIVERGENT_PROMOTER |           |           |           |      |  |
| 1.9755682 | 3.932831  | PROMOTEI           | 253.5165  | 1.5648218 | 2.9584096 | 1877 |  |
| 2.056107  | 4.1586262 | PROMOTER           |           |           |           |      |  |
| 2.0404935 | 4.1138623 | PROMOTER           |           |           |           |      |  |
| 1.6522813 | 3.1433029 | DIVERGENT_PROMOTER |           |           |           |      |  |
| 1.7194468 | 3.2931011 | DIVERGENT_PROMOTER |           |           |           |      |  |
| 1.8182333 | 3.5264909 | PROMOTER           |           | 1.5427432 | 2.9134796 | 2876 |  |
| 1.7352779 | 3.3294362 | DIVERGENT_PROMOTER |           |           |           |      |  |
| 1.8385088 | 3.5764017 | PROMOTER           |           |           |           |      |  |
| 1.7424318 | 3.3459869 | PROMOTER           |           |           |           |      |  |
| 1.6670523 | 3.1756508 | PROMOTER           |           |           |           |      |  |
| 1.9610184 | 3.8933672 | DIVERGENT_PROMOTER |           |           |           |      |  |
| 2.0601246 | 4.1702232 | PROMOTEI           | 883.134   | 1.6877264 | 3.2214862 | 1530 |  |
| 1.7811812 | 3.4370747 | PROMOTEI           | 437.6356  |           |           |      |  |
| 2.4768589 | 5.5668411 | PROMOTEI           | 1374.489  |           |           |      |  |
| 2.1690526 | 4.4972797 | DIVERGENT_PROMOTER |           |           |           |      |  |
| 2.048459  | 4.1366388 | PROMOTEI           | 93.09155  |           |           |      |  |
| 2.0295584 | 4.0827986 | PROMOTEI           | 927.158   | 1.7280921 | 3.3128941 | 3870 |  |
| 1.6165357 | 3.0663783 | PROMOTEI           | 272.5314  |           |           |      |  |
| 1.9257921 | 3.799454  | PROMOTEI           | 290.5013  | 2.0325603 | 4.0913028 | 4209 |  |
| 1.9727545 | 3.9251683 | DIVERGENT_PROMOT   | 1.9703753 | 3.9187005 |           | 4683 |  |
| 1.7995311 | 3.4810707 | PROMOTEI           | 503.6905  | 1.492356  | 2.8134806 | 4054 |  |
| 1.9077646 | 3.7522725 | PROMOTEI           | 593.7806  | 1.6578201 | 3.1553939 | 4114 |  |
| 1.6068314 | 3.0458215 | PROMOTEI           | 700.5128  |           |           |      |  |
| 1.9908946 | 3.974834  | PROMOTEI           | 2184.052  | 2.3805456 | 5.2073364 | 164  |  |

|           |           |                    |           |           |           |      |
|-----------|-----------|--------------------|-----------|-----------|-----------|------|
| 2.1825235 | 4.5394688 | PROMOTEI           | 1393.228  |           |           |      |
| 1.6110075 | 3.0546509 | DIVERGENT_PROMOTER |           |           |           |      |
| 1.6789974 | 3.2020535 | PROMOTEI           | 871.5081  | 1.7290746 | 3.315151  | 2959 |
| 1.8168521 | 3.5231163 | PROMOTEI           | 312.6967  |           |           |      |
| 1.7087013 | 3.2686645 | PROMOTER           |           |           |           |      |
| 2.132645  | 4.3852072 | PROMOTEI           | 257.3077  |           |           |      |
| 2.2478538 | 4.7497573 | DIVERGENT_PROMOT   | 1.8533474 | 3.613376  |           | 3731 |
| 1.9137151 | 3.767781  | PROMOTEI           | 108.4389  | 1.936062  | 3.8265971 | 4442 |
| 2.3564146 | 5.1209611 | PROMOTEI           | 270.9424  | 1.6430765 | 3.1233116 | 4796 |
| 1.7145368 | 3.2819126 | DIVERGENT_PROMOT   | 1.5575083 | 2.9434504 |           | 4635 |
| 1.8213947 | 3.534227  | PROMOTEI           | 1332.719  |           |           |      |
| 2.2338004 | 4.7037142 | DIVERGENT_PROMOTER |           |           |           |      |
| 1.795727  | 3.4719039 | DIVERGENT_PROMOTER |           |           |           |      |
| 2.210616  | 4.6287287 | PROMOTEI           | 87.8842   |           |           |      |
| 1.9336051 | 3.820086  | DIVERGENT_PROMOT   | 1.7733467 | 3.4184604 |           | 3811 |
| 1.9393101 | 3.835222  | PROMOTEI           | 118.3379  |           |           |      |
| 2.1456046 | 4.4247765 | PROMOTEI           | 324.0791  |           |           |      |
| 1.7335122 | 3.3253638 | PROMOTER           |           |           |           |      |
| 2.0994875 | 4.2855712 | PROMOTEI           | 149.3942  | 0.9587351 | 1.943605  | 4515 |
| 2.2263854 | 4.6796006 | PROMOTEI           | 114.8965  |           |           |      |
| 2.382649  | 5.214934  | PROMOTEI           | 180.5801  |           |           |      |
| 1.6472411 | 3.1323406 | PROMOTEI           | 98.13789  |           |           |      |
| 1.8269963 | 3.5479761 | PROMOTEI           | 1351.072  | 1.7472672 | 3.3572203 | 2657 |
| 1.8170341 | 3.5235608 | DIVERGENT_PROMOTER |           |           |           |      |
| 1.6903783 | 3.2274132 | PROMOTER           |           | 2.285951  | 4.8768547 | 345  |
| 1.9256604 | 3.7991071 | PROMOTER           |           |           |           |      |
| 1.6293219 | 3.0936755 | PROMOTEI           | 135.7695  |           |           |      |
| 2.4407866 | 5.4293768 | PROMOTEI           | 527.6913  |           |           |      |
| 1.749818  | 3.3631614 | PROMOTEI           | 151.2737  |           |           |      |
| 2.173933  | 4.512519  | DIVERGENT_PROMOT   | 1.8111091 | 3.5091196 |           | 3755 |
| 2.0437214 | 4.123077  | PROMOTER           |           |           |           |      |
| 2.3195744 | 4.9918494 | DIVERGENT_PROMOTER |           |           |           |      |
| 1.7450439 | 3.3520505 | PROMOTER           |           |           |           |      |
| 1.9797407 | 3.9442218 | PROMOTEI           | 225.7195  |           |           |      |
| 1.7538677 | 3.3726151 | PROMOTEI           | 188.9357  |           |           |      |
| 2.105728  | 4.3041489 | PROMOTEI           | 202.1159  |           |           |      |
| 2.0028756 | 4.0079808 | PROMOTEI           | 2936.18   | 1.9883896 | 3.9679383 | 4319 |
| 2.0744417 | 4.2118139 | DIVERGENT_PROMOT   | 1.9655946 | 3.9057364 |           | 2519 |
| 2.6072023 | 6.0932093 | DIVERGENT_PROMOTER |           |           |           |      |
| 2.4028428 | 5.2884421 | PROMOTER           |           |           |           |      |
| 1.8981361 | 3.7273133 | PROMOTEI           | 1777.725  | 1.8147796 | 3.5180588 | 2352 |
| 2.214393  | 4.6408626 | PROMOTEI           | 247.5987  |           |           |      |
| 2.414856  | 5.3326624 | PROMOTER           |           |           |           |      |
| 1.8575395 | 3.6238908 | PROMOTEI           | 545.7009  |           |           |      |
| 1.7340012 | 3.3264912 | DIVERGENT_PROMOTER |           |           |           |      |
| 1.9663122 | 3.9076796 | PROMOTEI           | 843.7181  |           |           |      |
| 1.63571   | 3.1074044 | PROMOTEI           | 144.3777  |           |           |      |
| 2.082202  | 4.2345304 | PROMOTEI           | 1174.364  | 2.0738394 | 4.2100559 | 835  |
| 2.6221023 | 6.1564654 | PROMOTER           |           |           |           |      |
| 1.7606844 | 3.3885884 | PROMOTER           |           |           |           |      |
| 2.1557016 | 4.4558529 | DIVERGENT_PROMOT   | 1.5147742 | 2.857541  |           | 1315 |
| 2.1198235 | 4.3464077 | PROMOTEI           | 397.3643  |           |           |      |
| 1.7891535 | 3.4561205 | PROMOTEI           | 127.7042  |           |           |      |
| 1.9354777 | 3.8250476 | PROMOTEI           | 939.7617  |           |           |      |
| 1.6208862 | 3.075639  | PROMOTER           |           |           |           |      |
| 1.6553212 | 3.1499331 | PROMOTEI           | 116.2164  | 1.3218671 | 2.4998943 | 5494 |
| 1.672775  | 3.1882726 | PROMOTEI           | 461.6561  |           |           |      |
| 1.6036775 | 3.0391703 | PROMOTEI           | 543.3641  | 1.1581049 | 2.2316409 | 5603 |

|           |           |                    |          |           |           |      |
|-----------|-----------|--------------------|----------|-----------|-----------|------|
| 1.8800069 | 3.6807682 | PROMOTEI           | 1104.536 |           |           |      |
| 1.9466077 | 3.8546709 | PROMOTEI           | 512.6923 | 2.2805088 | 4.8584927 | 113  |
| 2.0364196 | 4.1022619 | PROMOTEI           | 457.2737 | 1.9935194 | 3.9820723 | 3216 |
| 1.6507006 | 3.1398608 | PROMOTEI           | 194.4857 |           |           |      |
| 2.2676723 | 4.8154556 | DIVERGENT_PROMOT   | 786.4874 | 1.4487185 | 2.7296548 | 5402 |
| 2.1380208 | 4.4015779 | PROMOTEI           | 786.4874 |           |           |      |
| 1.9106528 | 3.7597919 | PROMOTER           |          |           |           |      |
| 2.0680485 | 4.1931909 | PROMOTER           |          |           |           |      |
| 1.7707925 | 3.4124136 | PROMOTEI           | 129.2666 |           |           |      |
| 2.1158476 | 4.334446  | PROMOTEI           | 875.0965 | 1.3740481 | 2.5919683 | 4772 |
| 1.7798778 | 3.4339709 | PROMOTEI           | 414.0797 |           |           |      |
| 1.8579888 | 3.6250196 | DIVERGENT_PROMOTER |          |           |           |      |
| 1.7617059 | 3.3909885 | PROMOTEI           | 345.3091 |           |           |      |
| 1.960269  | 3.8913453 | PROMOTEI           | 362.1483 |           |           |      |
| 1.6322571 | 3.0999761 | PROMOTEI           | 161.9818 |           |           |      |
| 1.820245  | 3.5314116 | PROMOTEI           | 1478.389 |           |           |      |
| 2.486349  | 5.6035807 | PROMOTEI           | 295.6391 |           |           |      |
| 1.9112774 | 3.76142   | PROMOTEI           | 1305.399 | 1.3638269 | 2.5736697 | 2358 |
| 1.6458453 | 3.1293116 | PROMOTEI           | 1205.637 | 1.3286041 | 2.5115954 | 4933 |
| 2.0440352 | 4.1239739 | PROMOTER           |          |           |           |      |
| 1.8190159 | 3.5284043 | PROMOTEI           | 94.44121 |           |           |      |
| 2.026223  | 4.0733704 | PROMOTEI           | 631.3627 | 2.0334504 | 4.0938277 | 951  |
| 2.5253954 | 5.757312  | PROMOTEI           | 146.6173 |           |           |      |
| 1.6289071 | 3.0927862 | PROMOTER           |          |           |           |      |
| 1.8714495 | 3.6590002 | PROMOTEI           | 3149.52  |           |           |      |
| 1.8436761 | 3.5892343 | PROMOTEI           | 78.73708 |           |           |      |
| 1.765422  | 3.3997343 | PROMOTEI           | 193.3517 |           |           |      |

| Normalized | Normalized | Type   | transcript in | Normalized | Normalized | Rank (P2-NS_R1R2) |
|------------|------------|--------|---------------|------------|------------|-------------------|
| 1.6641808  | 3.1693364  | INSIDE | 1205.333      |            |            |                   |
| 1.7895253  | 3.4570113  | INSIDE |               | 1.8574678  | 3.6237107  | 1820              |
| 1.7374331  | 3.3344137  | INSIDE | 284.7299      | 1.7219399  | 3.2987968  | 5320              |
| 2.0159597  | 4.0444953  | INSIDE | 388.1852      | 2.339335   | 5.0606931  | 60                |
| 1.9635946  | 3.9003257  | INSIDE | 100.8769      |            |            |                   |
| 1.9450874  | 3.850611   | INSIDE | 258.2985      |            |            |                   |
| 1.6250008  | 3.0844234  | INSIDE | 154.2141      | 2.0336509  | 4.0943967  | 818               |
| 1.8466482  | 3.5966361  | INSIDE | 377.399       | 2.4653392  | 5.5225677  | 1367              |
| 2.1562262  | 4.4574734  | INSIDE | 780.6179      | 1.8219479  | 3.5355824  | 5092              |
| 1.6561468  | 3.1517362  | INSIDE |               |            |            |                   |
| 1.6280873  | 3.0910292  | INSIDE | 4186.778      |            |            |                   |
| 1.86745    | 3.6488706  | INSIDE |               | 1.7157912  | 3.2847674  | 1091              |
| 1.7424614  | 3.3460556  | INSIDE |               | 2.20177    | 4.6004341  | 2996              |
| 1.9209907  | 3.7868301  | INSIDE | 856.277       |            |            |                   |
| 1.6462777  | 3.1302496  | INSIDE | 3437.965      | 1.9794722  | 3.9434879  | 550               |
| 1.7421713  | 3.3453828  | INSIDE | 100.1353      |            |            |                   |
| 1.7039843  | 3.2579948  | INSIDE | 295.6129      | 1.9629846  | 3.8986769  | 1077              |
| 1.8157147  | 3.5203398  | INSIDE |               | 1.7642744  | 3.397031   | 907               |
| 1.6925346  | 3.2322406  | INSIDE |               |            |            |                   |
| 1.9118686  | 3.7629617  | INSIDE | 111.8079      |            |            |                   |
| 1.8085002  | 3.5027796  | INSIDE | 607.9088      | 1.942125   | 3.8427124  | 845               |
| 1.586601   | 3.0034091  | INSIDE | 263.71        | 1.5256907  | 2.8792453  | 2412              |
| 1.7126392  | 3.2775986  | INSIDE | 503.0589      |            |            |                   |
| 1.607896   | 3.0480699  | INSIDE | 1227.98       | 1.656706   | 3.1529581  | 5774              |
| 1.6154163  | 3.064      | INSIDE | 1217.231      | 1.8170592  | 3.5236221  | 1273              |
| 1.7060262  | 3.2626092  | INSIDE | 117.8557      | 1.8579575  | 3.624941   | 1929              |
| 1.6448151  | 3.1270778  | INSIDE | 737.4813      | 2.0362327  | 4.1017305  | 4569              |



|           |           |        |          |           |           |      |
|-----------|-----------|--------|----------|-----------|-----------|------|
| 1.6579744 | 3.1557314 | INSIDE |          | 2.3523808 | 5.1066628 | 3342 |
| 1.6333283 | 3.1022787 | INSIDE | 121.7141 |           |           |      |
| 1.6603727 | 3.1609817 | INSIDE | 132.7177 | 2.0160801 | 4.0448329 | 1985 |
| 1.6883689 | 3.2229212 | INSIDE |          | 1.6361945 | 3.1084481 | 2934 |
| 1.8919228 | 3.7112953 | INSIDE | 421.8677 | 2.2144747 | 4.6411255 | 2277 |
| 1.8609567 | 3.6324846 | INSIDE | 4648.278 | 1.4212313 | 2.6781399 | 3015 |
| 1.6045871 | 3.041087  | INSIDE | 117.5591 | 0.8144395 | 1.7586148 | 4792 |
| 1.6978728 | 3.2442226 | INSIDE | 173.0528 | 1.889183  | 3.7042539 | 3471 |
| 1.6129103 | 3.0586824 | INSIDE | 527.7981 | 1.666434  | 3.1742901 | 3729 |
| 1.80848   | 3.5027305 | INSIDE | 181.3971 |           |           |      |
| 1.816853  | 3.5231185 | INSIDE | 386.188  | 1.0296743 | 2.0415633 | 3758 |
| 1.7276719 | 3.3119294 | INSIDE | 123.0554 | 1.9657097 | 3.9060481 | 2231 |
| 1.6769148 | 3.1974345 | INSIDE | 1874.011 | 1.7056141 | 3.2616774 | 5858 |
| 1.7655578 | 3.4000543 | INSIDE |          |           |           |      |
| 1.6397083 | 3.1160282 | INSIDE | 134.3031 | 1.0088922 | 2.0123653 | 3227 |
| 2.174497  | 4.5142834 | INSIDE | 115.4983 |           |           |      |
| 1.6678916 | 3.1774988 | INSIDE | 142.1826 | 1.4295824 | 2.6936873 | 4851 |
| 1.7499036 | 3.3633609 | INSIDE |          |           |           |      |
| 1.9840165 | 3.9559289 | INSIDE | 119.7098 |           |           |      |
| 1.7106726 | 3.2731338 | INSIDE | 5484.765 | 1.2412152 | 2.3639757 | 3252 |
| 1.8321196 | 3.5605981 | INSIDE | 865.9063 | 1.4885758 | 2.8061182 | 4910 |
| 1.9181648 | 3.7794199 | INSIDE |          | 2.2467387 | 4.7460875 | 1628 |
| 1.6610875 | 3.1625483 | INSIDE | 1095.024 |           |           |      |
| 1.8167663 | 3.5229068 | INSIDE | 5544.171 | 1.4745449 | 2.7789597 | 1622 |
| 1.700478  | 3.2500862 | INSIDE | 279.5238 | 2.1275384 | 4.3697126 | 3082 |
| 1.7113214 | 3.2746062 | INSIDE | 353.8496 |           |           |      |
| 1.9624254 | 3.897166  | INSIDE | 103.462  | 1.1655407 | 2.2431727 | 954  |
| 1.6152464 | 3.0636392 | INSIDE | 106.7266 | 1.5962867 | 3.0236407 | 4862 |
| 1.778561  | 3.430838  | INSIDE | 139.8229 | 2.066572  | 4.1889016 | 3314 |
| 1.7733849 | 3.4185509 | INSIDE |          | 1.7651284 | 3.3990425 | 2010 |
| 1.7060473 | 3.2626569 | INSIDE |          | 1.1842587 | 2.272466  | 4825 |
| 1.681135  | 3.2068014 | INSIDE |          |           |           |      |
| 1.6425146 | 3.1220954 | INSIDE | 126.8279 |           |           |      |
| 1.6388531 | 3.1141817 | INSIDE |          | 1.750943  | 3.3657849 | 3049 |
| 1.8385315 | 3.576458  | INSIDE | 474.6024 |           |           |      |
| 1.850391  | 3.605979  | INSIDE | 1519.194 |           |           |      |
| 1.9420675 | 3.8425592 | INSIDE | 187.492  | 2.1870368 | 4.5536923 | 6263 |
| 1.6381059 | 3.1125692 | INSIDE | 709.7413 | 1.431097  | 2.6965168 | 1600 |
| 1.9125873 | 3.7648367 | INSIDE | 475.8784 | 1.8167526 | 3.5228733 | 4392 |
| 1.7890397 | 3.4558478 | INSIDE | 173.0395 |           |           |      |
| 1.8744599 | 3.6666432 | INSIDE | 513.7062 | 1.6908113 | 3.228382  | 4816 |
| 1.8662065 | 3.6457269 | INSIDE | 337.0405 |           |           |      |
| 1.605901  | 3.0438579 | INSIDE |          | 1.2074951 | 2.3093632 | 3948 |
| 2.5563033 | 5.8819858 | INSIDE | 3287.983 | 2.408366  | 5.3087272 | 429  |
| 1.6213933 | 3.0767203 | INSIDE | 130.1738 | 1.6558441 | 3.151075  | 3194 |
| 1.6003073 | 3.0320789 | INSIDE | 153.2401 | 1.1596166 | 2.2339805 | 6049 |
| 1.7542819 | 3.3735836 | INSIDE |          |           |           |      |
| 1.5949451 | 3.0208302 | INSIDE | 140.2023 |           |           |      |
| 1.6187232 | 3.0710313 | INSIDE | 840.3356 | 1.820601  | 3.5322832 | 3048 |
| 1.7130827 | 3.2786064 | INSIDE |          | 1.3798454 | 2.6024048 | 2638 |
| 1.9696072 | 3.9166147 | INSIDE | 142.48   |           |           |      |
| 1.8587449 | 3.6269199 | INSIDE | 615.9943 | 2.315339  | 4.977216  | 1129 |
| 1.7258437 | 3.3077351 | INSIDE | 2304.047 |           |           |      |
| 2.0235744 | 4.0658991 | INSIDE | 169.6144 | 1.1841309 | 2.2722647 | 369  |
| 1.656904  | 3.1533909 | INSIDE |          | 1.7333727 | 3.3250423 | 4538 |
| 1.6285955 | 3.0921183 | INSIDE | 2615.273 |           |           |      |
| 1.8485651 | 3.6014181 | INSIDE | 131.6597 |           |           |      |
| 1.8522447 | 3.6106153 | INSIDE |          | 2.300977  | 4.9279137 | 158  |

|           |           |        |          |           |           |      |
|-----------|-----------|--------|----------|-----------|-----------|------|
| 1.762522  | 3.3929073 | INSIDE | 309.2328 | 1.6779041 | 3.1996278 | 2131 |
| 1.6922498 | 3.2316026 | INSIDE |          | 1.9189414 | 3.7814549 | 4492 |
| 1.6864167 | 3.218563  | INSIDE | 101.0602 |           |           |      |
| 1.6180189 | 3.0695324 | INSIDE | 132.6257 |           |           |      |
| 1.6850107 | 3.2154278 | INSIDE | 145.0877 |           |           |      |
| 1.8833762 | 3.6893744 | INSIDE | 209.1509 |           |           |      |
| 1.6170617 | 3.0674965 | INSIDE | 291.8951 |           |           |      |
| 1.6809813 | 3.2064598 | INSIDE | 1971.721 |           |           |      |
| 1.5909344 | 3.012444  | INSIDE | 3135.627 | 1.1547339 | 2.2264325 | 6120 |
| 1.6186191 | 3.0708097 | INSIDE | 651.0538 | 2.086282  | 4.2465228 | 3324 |
| 1.7316741 | 3.3211298 | INSIDE |          |           |           |      |
| 1.9964249 | 3.9901    | INSIDE | 159.021  |           |           |      |
| 1.8592088 | 3.6280864 | INSIDE | 155.0118 |           |           |      |
| 1.6658388 | 3.1729808 | INSIDE | 826.5395 | 0.8396721 | 1.7896433 | 3826 |
| 1.9703704 | 3.9186872 | INSIDE |          |           |           |      |

enes)

| Normalized | Normalized | Type   | transcript in | Normalized | Normalized | Rank (P2-12H_R1R2) |
|------------|------------|--------|---------------|------------|------------|--------------------|
| 2.8375747  | 7.1481737  | INSIDE | 111.167       | 2.0925217  | 4.2649289  | 433                |
| 2.2998898  | 4.9242015  | INSIDE |               | 1.4999393  | 2.8283081  | 485                |
| 2.2629132  | 4.7995968  | INSIDE |               | 1.859372   | 3.6284968  | 406                |
| 2.2975895  | 4.9163564  | INSIDE | 808.4681      | 1.8624985  | 3.6363687  | 367                |
| 1.8664103  | 3.646242   | INSIDE | 118.0477      | 1.7875012  | 3.4521645  | 194                |
| 2.2097898  | 4.6260787  | INSIDE |               | 1.6224446  | 3.0789631  | 1741               |
| 2.3097856  | 4.9580939  | INSIDE | 119.7771      | 2.3015075  | 4.9297261  | 171                |
| 2.6143115  | 6.1233091  | INSIDE | 1002.125      | 2.2295737  | 4.6899538  | 349                |
| 2.4197028  | 5.3506079  | INSIDE | 182.0202      | 1.8446596  | 3.5916819  | 2283               |
| 3.028988   | 8.1623694  | INSIDE | 184.7832      | 1.4420102  | 2.7169918  | 1374               |
| 1.8612074  | 3.6331159  | INSIDE | 239.5239      | 2.2624505  | 4.7980577  | 388                |
| 1.8808694  | 3.6829694  | INSIDE | 768.0961      | 2.312153   | 4.9662366  | 152                |
| 2.0473123  | 4.1333522  | INSIDE |               | 2.190279   | 4.5639374  | 675                |
| 2.6680353  | 6.3556307  | INSIDE | 369.5122      | 2.520149   | 5.7364134  | 107                |
| 2.2192128  | 4.6563929  | INSIDE | 194.5683      | 1.5617547  | 2.9521268  | 747                |
| 1.9391494  | 3.8347949  | INSIDE | 491.7883      | 1.297024   | 2.4572148  | 3091               |
| 2.4804387  | 5.5806714  | INSIDE | 196.4861      | 2.0281625  | 4.0788501  | 1039               |
| 2.408512   | 5.3092644  | INSIDE | 146.2722      | 1.6248529  | 3.0841072  | 1454               |
| 2.817801   | 7.0508686  | INSIDE | 527.1342      | 1.7205334  | 3.2955823  | 1174               |
| 3.1867988  | 9.1058822  | INSIDE | 311.6694      | 1.4111937  | 2.6595713  | 197                |
| 1.985539   | 3.9601059  | INSIDE |               | 1.9268812  | 3.8023233  | 213                |
| 2.4753368  | 5.5609709  | INSIDE |               | 1.699116   | 3.2470194  | 486                |
| 2.3147657  | 4.9752385  | INSIDE |               | 1.8921678  | 3.7119256  | 4184               |
| 2.5717266  | 5.9452052  | INSIDE | 3166.377      | 1.9164581  | 3.7749515  | 220                |
| 2.7233937  | 6.6042453  | INSIDE | 243.1206      | 2.3193772  | 4.9911671  | 231                |
| 2.9525435  | 7.7411264  | INSIDE |               | 2.084415   | 4.2410309  | 289                |
| 1.9912268  | 3.9757493  | INSIDE | 334.4827      | 2.2743917  | 4.8379361  | 180                |
| 3.3878675  | 10.467663  | INSIDE |               | 2.6741352  | 6.38256    | 847                |
| 2.0655549  | 4.1859495  | INSIDE | 170.1185      | 1.3698301  | 2.5844013  | 3647               |
| 2.185232   | 4.5479992  | INSIDE | 423.0923      | 1.3900356  | 2.6208515  | 2214               |
| 2.301821   | 4.9307975  | INSIDE | 263.6499      |            |            |                    |
| 1.7636384  | 3.3955338  | INSIDE | 610.1351      | 1.460811   | 2.7526306  | 783                |
| 2.2300425  | 4.691478   | INSIDE |               | 1.437541   | 2.7085881  | 1983               |
| 2.5065196  | 5.6824757  | INSIDE | 970.579       | 1.5861181  | 3.002404   | 3598               |
| 2.2274835  | 4.6831638  | INSIDE | 129.283       | 2.2369792  | 4.7140897  | 633                |
| 2.068089   | 4.1933086  | INSIDE | 773.8264      | 2.0964093  | 4.276437   | 351                |
| 1.7399341  | 3.3401991  | INSIDE |               | 1.4785621  | 2.7867085  | 2400               |
| 2.221052   | 4.6623328  | INSIDE |               | 1.7472124  | 3.3570928  | 828                |
| 2.223963   | 4.6717498  | INSIDE | 85.11141      | 1.0198691  | 2.027735   | 5416               |

|           |           |        |          |           |           |      |
|-----------|-----------|--------|----------|-----------|-----------|------|
| 1.784177  | 3.4442193 | INSIDE |          | 1.4654926 | 2.7615775 | 2463 |
| 2.7859783 | 6.8970446 | INSIDE |          | 1.6547915 | 3.1487768 | 627  |
| 2.209249  | 4.6243449 | INSIDE | 64.19047 | 1.47982   | 2.7891393 | 1159 |
| 1.9052974 | 3.7458611 | INSIDE | 484.3774 | 1.8343551 | 3.5661196 | 1550 |
| 2.3117988 | 4.9650175 | INSIDE | 277.4359 | 1.8578132 | 3.6245784 | 2439 |
| 2.4730022 | 5.5519793 | INSIDE |          | 1.997407  | 3.9928171 | 2023 |
| 2.3727357 | 5.1792231 | INSIDE | 658.8298 | 1.7994046 | 3.4807654 | 909  |
| 2.0546515 | 4.1544327 | INSIDE | 412.9338 | 1.7846016 | 3.4452331 | 982  |
| 2.4191656 | 5.3486159 | INSIDE | 178.7338 | 2.4685416 | 5.53484   | 54   |
| 2.175274  | 4.5167154 | INSIDE | 129.6524 | 1.6926628 | 3.2325279 | 641  |
| 1.6728187 | 3.1883692 | INSIDE | 136.9188 | 1.4856026 | 2.8003412 | 578  |
| 2.08624   | 4.2463992 | INSIDE | 91.56937 | 1.5451422 | 2.9183283 | 2263 |
| 2.775311  | 6.8462359 | INSIDE |          | 1.8042567 | 3.4924917 | 1556 |
| 2.2829192 | 4.8666169 | INSIDE | 171.8482 | 1.7998077 | 3.4817381 | 1144 |
| 2.107639  | 4.309854  | INSIDE | 164.995  | 1.4414872 | 2.716007  | 2643 |
| 2.4318314 | 5.3957795 | INSIDE | 166.6037 | 1.6764159 | 3.196329  | 1459 |
| 1.7939395 | 3.4676048 | INSIDE | 123.5355 | 2.1443954 | 4.4210695 | 863  |
| 2.4389322 | 5.4224025 | INSIDE | 347.4851 | 1.8891443 | 3.7041546 | 249  |
| 2.4314752 | 5.3944475 | INSIDE |          | 2.084725  | 4.2419423 | 520  |
| 2.043989  | 4.1238418 | INSIDE |          | 2.2476065 | 4.7489432 | 2146 |
| 2.0991437 | 4.28455   | INSIDE | 280.2976 | 1.2605532 | 2.3958759 | 1292 |
| 2.3211567 | 4.9973273 | INSIDE | 231.8985 | 1.3508043 | 2.5505428 | 1588 |
| 2.5858605 | 6.0037358 | INSIDE |          | 1.8337508 | 3.5646262 | 1212 |
| 2.155528  | 4.4553167 | INSIDE |          | 1.759752  | 3.3863991 | 4904 |
| 2.0069482 | 4.019311  | INSIDE | 272.2134 | 1.931836  | 3.8154045 | 269  |
| 2.0938323 | 4.2688051 | INSIDE |          | 1.8443022 | 3.5907923 | 707  |
| 2.5716407 | 5.9448512 | INSIDE | 719.1517 | 1.7354544 | 3.3298436 | 4244 |
| 2.0304    | 4.085181  | INSIDE | 733.639  | 1.1968027 | 2.2923109 | 494  |
| 2.0798883 | 4.2277448 | INSIDE |          | 1.3283998 | 2.5112398 | 3765 |
| 2.5586658 | 5.8916258 | INSIDE |          | 1.498577  | 2.8256387 | 1160 |
| 1.72061   | 3.2957573 | INSIDE | 181.3087 | 2.2349508 | 4.7074664 | 1341 |
| 2.1543746 | 4.4517562 | INSIDE |          | 1.5111688 | 2.8504087 | 1146 |
| 1.9990491 | 3.9973644 | INSIDE | 639.1933 | 1.4064484 | 2.6508378 | 3079 |
| 2.2137053 | 4.638651  | INSIDE |          | 1.9349359 | 3.8236114 | 646  |
| 2.195788  | 4.5813983 | INSIDE | 722.7895 | 1.8144933 | 3.5173607 | 684  |
| 2.4626877 | 5.5124272 | INSIDE |          | 1.679259  | 3.2026341 | 1270 |
| 2.5697937 | 5.9372452 | INSIDE |          | 2.0620193 | 4.1757036 | 286  |
| 1.9990366 | 3.9973298 | INSIDE |          | 1.6368852 | 3.1099367 | 2884 |
| 2.2726483 | 4.8320933 | INSIDE |          | 1.7484729 | 3.3600272 | 2332 |
| 2.476497  | 5.5654448 | INSIDE | 692.4073 | 1.8052182 | 3.4948201 | 2026 |
| 2.5021813 | 5.6654137 | INSIDE | 143.9918 | 1.8234928 | 3.5393705 | 3391 |
| 2.9120355 | 7.5267941 | INSIDE |          | 2.2638676 | 4.8027729 | 1665 |
| 2.626968  | 6.177264  | INSIDE |          | 2.004299  | 4.0119371 | 1796 |
| 2.5917678 | 6.0283693 | INSIDE |          | 2.0345402 | 4.0969214 | 2957 |
| 2.793723  | 6.934169  | INSIDE | 143.8819 | 2.5602856 | 5.8982444 | 978  |
| 1.9768718 | 3.9363863 | INSIDE | 632.1733 | 2.1374655 | 4.399884  | 118  |
| 2.0671349 | 4.1905363 | INSIDE |          | 1.6448404 | 3.1271326 | 2338 |
| 2.1724126 | 4.5077659 | INSIDE |          | 2.5875568 | 6.0107991 | 160  |
| 2.5342784 | 5.7928704 | INSIDE | 303.0901 | 2.1586845 | 4.4650753 | 2180 |
| 2.4235556 | 5.3649161 | INSIDE |          | 2.0536964 | 4.1516833 | 1251 |
| 2.0604773 | 4.1712428 | INSIDE | 417.2693 | 1.547163  | 2.9224189 | 1066 |
| 2.4051538 | 5.2969203 | INSIDE | 466.0934 | 1.7540689 | 3.3730855 | 1182 |
| 2.1759403 | 4.5188019 | INSIDE | 144.4429 | 1.3181865 | 2.4935247 | 2962 |
| 1.9306926 | 3.8123818 | INSIDE | 146.2673 | 1.7874346 | 3.4520051 | 1239 |
| 2.252278  | 4.7643454 | INSIDE | 191.2563 | 1.6183531 | 3.0702435 | 5053 |
| 1.9594116 | 3.8890333 | INSIDE |          | 1.586066  | 3.0022955 | 2072 |
| 2.233671  | 4.7032923 | INSIDE |          | 1.6398963 | 3.1164343 | 2304 |
| 1.8361222 | 3.5704903 | INSIDE | 110.0023 | 1.7085725 | 3.2683727 | 1078 |

|           |           |        |          |           |           |      |
|-----------|-----------|--------|----------|-----------|-----------|------|
| 2.1124008 | 4.3241027 | INSIDE | 165.4915 | 1.7455342 | 3.3531899 | 2618 |
| 2.106085  | 4.3052141 | INSIDE | 167.4689 | 1.6246179 | 3.0836048 | 1418 |
| 2.2020247 | 4.6012463 | INSIDE | 1199.886 | 2.2084231 | 4.6216983 | 187  |
| 2.5942218 | 6.0386322 | INSIDE | 265.5132 | 1.8754082 | 3.6690542 | 2503 |
| 2.4398859 | 5.4259882 | INSIDE |          | 2.0009582 | 4.0026576 | 2551 |
| 1.8770357 | 3.6731955 | INSIDE | 169.0238 | 1.7229122 | 3.3010207 | 824  |
| 2.5141346 | 5.7125489 | INSIDE | 184.4141 | 2.117524  | 4.3394855 | 3792 |
| 1.9943556 | 3.984381  | INSIDE | 784.9267 | 1.3372488 | 2.5266902 | 1531 |
| 1.9226791 | 3.7912645 | INSIDE | 228.2984 | 1.993757  | 3.9827281 | 1246 |
| 2.3207796 | 4.9960212 | INSIDE | 141.4496 | 1.6702182 | 3.1826273 | 2314 |
| 2.4148078 | 5.3324843 | INSIDE | 509.279  | 1.8094907 | 3.5051853 | 2203 |
| 1.9820945 | 3.9506622 | INSIDE | 214.8001 | 1.7605764 | 3.3883347 | 2553 |
| 1.8604724 | 3.6312655 | INSIDE | 125.689  | 1.4133959 | 2.6636341 | 771  |
| 2.0427215 | 4.1202204 | INSIDE | 272.1078 | 2.6895099 | 6.4509422 | 265  |
| 2.1034374 | 4.2973206 | INSIDE | 152.5477 | 1.4435546 | 2.7199019 | 1929 |
| 2.4023063 | 5.2864759 | INSIDE | 176.1994 | 1.538035  | 2.903987  | 1532 |
| 2.0451322 | 4.1271109 | INSIDE | 242.1581 | 1.4866678 | 2.8024095 | 3634 |
| 2.5528216 | 5.8678077 | INSIDE | 207.977  | 2.584158  | 5.9966551 | 11   |
| 1.911228  | 3.7612912 | INSIDE | 1168.667 |           |           |      |
| 2.876752  | 7.3449466 | INSIDE |          | 1.3606923 | 2.5680838 | 1724 |
| 2.4607189 | 5.5049097 | INSIDE |          | 1.881746  | 3.6852079 | 301  |
| 2.4135246 | 5.3277434 | INSIDE | 124.7735 | 1.8911163 | 3.7092212 | 1121 |
| 2.510322  | 5.6974723 | INSIDE | 388.6622 | 1.8765495 | 3.6719579 | 674  |
| 2.3837004 | 5.2187359 | INSIDE | 458.3983 | 1.8278325 | 3.5500332 | 225  |
| 2.686612  | 6.4379974 | INSIDE |          |           |           |      |
| 2.3121629 | 4.9662707 | INSIDE | 1578.505 | 2.0749226 | 4.2132181 | 204  |
| 2.1894944 | 4.561456  | INSIDE | 712.011  | 2.203273  | 4.6052293 | 420  |
| 2.0911736 | 4.2609455 | INSIDE | 247.8007 | 1.7109666 | 3.2738009 | 2446 |
| 2.772717  | 6.8339372 | INSIDE | 311.3307 | 1.9801055 | 3.9452193 | 3359 |
| 2.1726818 | 4.5086071 | INSIDE |          | 1.3578471 | 2.5630242 | 4342 |
| 1.978255  | 3.9401621 | INSIDE | 112.3223 | 1.6312882 | 3.0978949 | 383  |
| 1.8246149 | 3.5421244 | INSIDE |          | 1.557458  | 2.9433477 | 1209 |
| 2.3727016 | 5.1791007 | INSIDE |          | 1.5572689 | 2.942962  | 5039 |
| 1.9478092 | 3.8578825 | INSIDE | 182.5349 | 1.9165742 | 3.7752553 | 332  |
| 2.392839  | 5.2518984 | INSIDE | 421.0205 | 1.9637117 | 3.9006423 | 447  |
| 2.7382011 | 6.6723784 | INSIDE | 229.679  | 2.1493714 | 4.4363445 | 1007 |
| 1.9586409 | 3.8869563 | INSIDE |          | 1.528027  | 2.8839117 | 1519 |
| 2.204144  | 4.6080105 | INSIDE |          | 1.3621266 | 2.5706382 | 2120 |
| 2.3773634 | 5.195863  | INSIDE | 124.6984 | 1.9275916 | 3.8041961 | 2054 |
| 2.5504863 | 5.8583172 | INSIDE | 149.4233 | 1.9315051 | 3.8145294 | 3507 |
| 1.8765643 | 3.6719955 | INSIDE |          | 1.7583764 | 3.3831717 | 601  |
| 1.8043506 | 3.4927191 | INSIDE |          |           |           |      |
| 2.0834484 | 4.2381904 | INSIDE | 571.0599 | 1.4783494 | 2.7862977 | 2642 |
| 2.0570533 | 4.1613548 | INSIDE |          | 1.7631332 | 3.394345  | 2064 |
| 2.0921123 | 4.2637188 | INSIDE |          | 1.8234454 | 3.5392542 | 720  |
| 1.673892  | 3.1907421 | INSIDE |          | 1.7934912 | 3.4665275 | 353  |
| 2.3335028 | 5.0402762 | INSIDE | 188.5048 | 1.4738204 | 2.7775645 | 2517 |
| 2.2216487 | 4.6642616 | INSIDE | 117.6286 | 1.3396821 | 2.5309554 | 2818 |
| 2.5835254 | 5.9940262 | INSIDE | 523.0806 | 1.2507136 | 2.379591  | 1755 |
| 2.0312667 | 4.0876359 | INSIDE | 193.6056 |           |           |      |
| 1.7706007 | 3.4119599 | INSIDE | 198.1243 | 1.7533842 | 3.371485  | 389  |
| 2.1661286 | 4.488174  | INSIDE | 545.3147 | 1.2861992 | 2.4388469 | 2746 |
| 2.158046  | 4.4630996 | INSIDE |          | 1.50638   | 2.8409629 | 3156 |
| 2.1466289 | 4.4279192 | INSIDE | 313.5471 | 1.5725213 | 2.9742405 | 3732 |
| 1.8467193 | 3.5968134 | INSIDE |          | 2.1584694 | 4.4644096 | 307  |
| 2.0199497 | 4.0556965 | INSIDE | 882.243  | 2.282878  | 4.8664779 | 188  |
| 1.8571149 | 3.6228245 | INSIDE | 205.9295 | 1.9548365 | 3.8767199 | 2225 |
| 1.9908174 | 3.9746213 | INSIDE | 383.42   | 2.012341  | 4.0343633 | 1090 |

|           |           |        |          |           |           |      |
|-----------|-----------|--------|----------|-----------|-----------|------|
| 2.2782729 | 4.8509688 | INSIDE |          | 1.8433621 | 3.5884532 | 1205 |
| 2.1141477 | 4.3293418 | INSIDE | 167.3421 | 1.9171299 | 3.7767097 | 529  |
| 2.1883912 | 4.5579693 | INSIDE | 290.6799 | 1.8204633 | 3.531946  | 1667 |
| 2.1240268 | 4.3590894 | INSIDE | 178.267  | 1.8627278 | 3.6369467 | 392  |
| 1.6809027 | 3.2062851 | INSIDE |          | 1.4483312 | 2.7289221 | 3160 |
| 2.0705464 | 4.2004573 | INSIDE | 1240.499 | 1.7137706 | 3.28017   | 2776 |
| 1.9885011 | 3.968245  | INSIDE | 137.3601 |           |           |      |
| 2.985568  | 7.9203709 | INSIDE | 690.5484 | 2.254939  | 4.7731412 | 2936 |
| 2.3719425 | 5.1763763 | INSIDE | 142.2173 |           |           |      |
| 2.128224  | 4.3717897 | INSIDE | 98.27532 | 1.547515  | 2.923132  | 2271 |
| 1.8835703 | 3.6898708 | INSIDE | 133.1719 | 1.5030097 | 2.8343338 | 2288 |
| 2.2470145 | 4.7469949 | INSIDE | 130.1426 | 1.9245082 | 3.7960742 | 1211 |
| 2.075196  | 4.2140166 | INSIDE | 199.4873 | 1.9135579 | 3.7673704 | 3393 |
| 2.1592536 | 4.466837  | INSIDE | 1607.072 | 1.9612927 | 3.8941075 | 731  |
| 2.4424314 | 5.4355703 | INSIDE | 148.6824 | 1.744288  | 3.3502947 | 648  |
| 2.5272262 | 5.7646228 | INSIDE | 552.7131 | 2.0243404 | 4.0680584 | 2323 |
| 1.6854539 | 3.2164158 | INSIDE | 189.7815 | 1.2271308 | 2.3410095 | 2138 |
| 2.2390137 | 4.7207422 | INSIDE | 124.1791 | 2.078392  | 4.2233623 | 498  |
| 2.2403913 | 4.7252521 | INSIDE | 445.0245 | 1.6999602 | 3.24892   | 2800 |
| 2.1833358 | 4.5420255 | INSIDE | 119.9473 | 1.659177  | 3.158363  | 1829 |
| 2.1086812 | 4.3129686 | INSIDE | 227.097  | 1.9450418 | 3.8504893 | 784  |
| 2.469811  | 5.5397121 | INSIDE | 4387.774 | 2.0205026 | 4.0572511 | 774  |
| 2.1514227 | 4.4426568 | INSIDE | 272.1976 | 2.1477242 | 4.4312822 | 1142 |
| 2.440641  | 5.4288288 | INSIDE | 332.7159 | 1.6531649 | 3.1452286 | 2086 |
| 3.0274036 | 8.1534102 | INSIDE |          |           |           |      |
| 2.4583783 | 5.4959859 | INSIDE | 181.2563 | 1.1982882 | 2.2946724 | 3116 |
| 2.070277  | 4.199673  | INSIDE | 184.49   | 1.844062  | 3.5901945 | 2417 |
| 2.3737319 | 5.1828006 | INSIDE | 110.6935 |           |           |      |
| 2.0840452 | 4.239944  | INSIDE | 138.0311 | 1.5850431 | 3.0001676 | 2296 |
| 2.5075462 | 5.6865207 | INSIDE |          | 1.6912446 | 3.2293518 | 927  |
| 2.370043  | 5.1695654 | INSIDE | 315.277  | 1.8002131 | 3.4827166 | 3064 |
| 2.5532606 | 5.8695935 | INSIDE | 240.7241 |           |           |      |
| 2.1942792 | 4.5766095 | INSIDE |          | 1.7854755 | 3.4473207 | 2191 |
| 1.8305242 | 3.5566628 | INSIDE |          | 1.2881125 | 2.4420834 | 3239 |
| 1.5970699 | 3.0252826 | INSIDE |          | 1.0713328 | 2.1013738 | 3730 |
| 2.1929193 | 4.5722976 | INSIDE |          | 1.4973048 | 2.8231481 | 3908 |
| 2.0928068 | 4.2657718 | INSIDE | 127.9155 | 1.3963087 | 2.6322722 | 2766 |
| 2.4721851 | 5.5488358 | INSIDE | 923.4659 | 1.5002722 | 2.8289608 | 2886 |
| 1.793748  | 3.4671446 | INSIDE |          | 1.4277911 | 2.6903448 | 2322 |
| 1.9283851 | 3.806289  | INSIDE |          | 1.6737002 | 3.1903179 | 1901 |
| 2.0111327 | 4.0309858 | INSIDE | 169.7178 | 1.7395493 | 3.3393083 | 1583 |
| 2.3520083 | 5.1053444 | INSIDE |          | 1.1285677 | 2.1864157 | 3251 |
| 1.6405689 | 3.1178876 | INSIDE | 290.1361 | 1.7160751 | 3.2854138 | 1396 |
| 2.0651743 | 4.1848453 | INSIDE |          | 1.63026   | 3.0956878 | 2976 |
| 2.6827867 | 6.4209497 | INSIDE |          | 2.583475  | 5.9938168 | 283  |
| 2.2455583 | 4.7422059 | INSIDE |          | 1.4108233 | 2.6588885 | 2873 |
| 2.0535834 | 4.1513581 | INSIDE |          | 1.8629982 | 3.6376285 | 3533 |
| 2.0211542 | 4.059084  | INSIDE | 864.2783 | 1.4804145 | 2.7902889 | 1833 |
| 1.8768755 | 3.6727877 | INSIDE |          | 2.2065198 | 4.6156051 | 1507 |
| 1.8689771 | 3.652735  | INSIDE | 1285.821 | 1.6222925 | 3.0786386 | 2718 |
| 2.2341933 | 4.7049954 | INSIDE | 407.0571 | 1.6221141 | 3.0782579 | 895  |
| 2.2318504 | 4.6973608 | INSIDE | 127.6055 | 2.2513864 | 4.7614019 | 1124 |
| 1.8931404 | 3.7144289 | INSIDE | 301.0237 | 1.8158962 | 3.5207827 | 2380 |
| 1.9901757 | 3.9728538 | INSIDE | 167.4585 | 1.9846083 | 3.957552  | 1899 |
| 2.438614  | 5.4212066 | INSIDE |          |           |           |      |
| 1.9255134 | 3.7987201 | INSIDE |          | 1.4448156 | 2.7222803 | 1393 |
| 1.9185113 | 3.7803277 | INSIDE | 200.9917 | 1.4619792 | 2.7548604 | 2753 |
| 2.2667809 | 4.8124812 | INSIDE | 671.1576 | 1.8698092 | 3.6548424 | 2147 |

|           |           |        |          |           |           |      |
|-----------|-----------|--------|----------|-----------|-----------|------|
| 2.210368  | 4.6279331 | INSIDE | 109.6214 | 1.7314698 | 3.3206595 | 2032 |
| 1.989217  | 3.9702146 | INSIDE | 730.7988 | 1.5223051 | 2.8724964 | 538  |
| 1.8035759 | 3.490844  | INSIDE | 691.5104 | 1.4001153 | 2.6392267 | 1927 |
| 1.8393581 | 3.5785077 | INSIDE | 433.7361 | 1.8532636 | 3.6131662 | 1231 |
| 2.146466  | 4.4274193 | INSIDE | 162.0919 | 1.7218312 | 3.2985482 | 858  |
| 1.9302267 | 3.8111508 | INSIDE |          | 1.6950552 | 3.2378928 | 1638 |
| 1.612327  | 3.057446  | INSIDE | 254.3369 | 1.4300053 | 2.6944771 | 2373 |
| 1.7637985 | 3.3959106 | INSIDE | 2979.846 | 1.4090196 | 2.6555664 | 1850 |
| 1.6910515 | 3.2289196 | INSIDE |          | 1.3521467 | 2.5529171 | 5583 |
| 2.0323668 | 4.090754  | INSIDE | 137.5924 | 1.762855  | 3.3936905 | 711  |
| 1.7325892 | 3.323237  | INSIDE | 1877.345 | 2.1848865 | 4.5469102 | 97   |
| 2.0796027 | 4.226908  | INSIDE | 209.5804 | 2.1366403 | 4.3973681 | 1050 |
| 2.3674147 | 5.1601561 | INSIDE | 1459.399 | 1.4674946 | 2.7654123 | 5149 |
| 2.3527193 | 5.1078611 | INSIDE |          | 2.354897  | 5.1155771 | 44   |
| 2.3279665 | 5.0209714 | INSIDE | 112.4486 | 1.7315722 | 3.3208952 | 4457 |
| 2.1961343 | 4.5824982 | INSIDE | 65.76645 | 2.3121822 | 4.9663371 | 544  |
| 1.9737885 | 3.9279825 | INSIDE | 157.989  | 1.338974  | 2.5297135 | 4680 |
| 2.5873406 | 6.0098984 | INSIDE | 591.605  | 2.5831716 | 5.9925565 | 226  |
| 2.4503896 | 5.4656368 | INSIDE |          | 1.9400733 | 3.8372514 | 2780 |
| 1.7927364 | 3.4647143 | INSIDE | 254.0923 | 1.573722  | 2.9767169 | 1946 |
| 2.7941232 | 6.9360928 | INSIDE |          | 2.2408316 | 4.7266944 | 1526 |
| 2.4693272 | 5.5378547 | INSIDE | 125.9002 | 1.9941831 | 3.9839046 | 2661 |
| 2.4710922 | 5.5446339 | INSIDE | 598.233  | 1.5522105 | 2.9326614 | 151  |
| 1.6546096 | 3.1483798 | INSIDE | 152.9174 | 1.162722  | 2.2387943 | 3375 |
| 2.1154342 | 4.3332041 | INSIDE | 156.2063 | 1.8501804 | 3.6054527 | 2926 |
| 1.6295438 | 3.0941514 | INSIDE | 1007.945 | 1.6627225 | 3.1661344 | 2591 |
| 1.8462497 | 3.5956428 | INSIDE |          |           |           |      |
| 2.0661187 | 4.1875857 | INSIDE |          | 1.853819  | 3.6145574 | 1799 |
| 2.0882354 | 4.2522765 | INSIDE | 196.7813 |           |           |      |
| 1.898205  | 3.7274913 | INSIDE |          | 2.006313  | 4.0175417 | 3004 |
| 2.1617455 | 4.474559  | INSIDE |          | 1.8221806 | 3.5361528 | 1761 |
| 1.8394396 | 3.5787099 | INSIDE | 1610.714 | 1.8367785 | 3.5721149 | 2365 |
| 1.9268385 | 3.8022107 | INSIDE | 213.7794 |           |           |      |
| 2.559145  | 5.8935831 | INSIDE | 848.5114 | 1.3109308 | 2.4810156 | 3722 |
| 1.8090531 | 3.5041222 | INSIDE |          | 1.9577155 | 3.8844639 | 691  |
| 2.039538  | 4.1111386 | INSIDE |          | 1.6794502 | 3.2030586 | 3582 |
| 2.2839508 | 4.870098  | INSIDE | 1139.54  | 2.1306424 | 4.3791243 | 1726 |
| 2.4039278 | 5.2924209 | INSIDE | 202.1522 | 1.7362493 | 3.3316788 | 823  |
| 1.7600229 | 3.387035  | INSIDE |          | 1.4093013 | 2.656085  | 4491 |
| 1.8816638 | 3.6849979 | INSIDE | 460.1884 | 1.4185482 | 2.6731637 | 3044 |
| 2.3884172 | 5.2358262 | INSIDE | 421.7219 | 1.683248  | 3.2115016 | 1517 |
| 2.395573  | 5.2618605 | INSIDE | 1388.453 |           |           |      |
| 2.458227  | 5.4954095 | INSIDE | 1004.281 | 1.7708186 | 3.4124753 | 563  |
| 1.934601  | 3.8227239 | INSIDE |          | 1.6178546 | 3.0691829 | 5252 |
| 1.8574929 | 3.6237738 | INSIDE |          | 2.0914965 | 4.2618993 | 1928 |
| 2.0822945 | 4.2348019 | INSIDE | 594.4813 | 1.7030195 | 3.2558167 | 810  |
| 2.2270627 | 4.681798  | INSIDE | 1372.753 | 1.5796628 | 2.9889998 | 5306 |
| 2.3786736 | 5.2005839 | INSIDE |          | 1.4676538 | 2.7657175 | 1898 |
| 1.777759  | 3.4289313 | INSIDE | 152.9968 | 1.4057746 | 2.6496    | 2697 |
| 2.1504776 | 4.4397474 | INSIDE | 164.8839 | 1.8273116 | 3.5487516 | 3956 |
| 2.1841936 | 4.5447269 | INSIDE |          | 1.9153179 | 3.7719692 | 4913 |
| 2.0448325 | 4.1262536 | INSIDE |          | 1.6760762 | 3.1955764 | 1858 |
| 1.7822987 | 3.439738  | INSIDE | 130.1641 | 1.4232676 | 2.6819226 | 3948 |
| 1.8701305 | 3.6556565 | INSIDE | 118.4413 | 1.6261356 | 3.0868505 | 2458 |
| 2.2056704 | 4.6128884 | INSIDE |          | 1.2454132 | 2.3708645 | 1845 |
| 1.768073  | 3.4059872 | INSIDE | 120.6753 | 1.5998377 | 3.0310921 | 373  |
| 2.2569559 | 4.7798187 | INSIDE | 81.92689 | 1.9207608 | 3.7862267 | 588  |
| 2.1731904 | 4.5101968 | INSIDE | 701.0256 | 1.2802669 | 2.4288391 | 1006 |

|           |           |        |          |           |           |      |
|-----------|-----------|--------|----------|-----------|-----------|------|
| 2.7418303 | 6.6891843 | INSIDE | 285.0641 | 2.3061368 | 4.94557   | 1804 |
| 2.9845092 | 7.9145603 | INSIDE | 152.0555 | 1.2771642 | 2.4236211 | 3530 |
| 2.376256  | 5.1918763 | INSIDE | 221.9313 | 1.9243374 | 3.7956248 | 866  |
| 2.1115732 | 4.3216229 | INSIDE | 602.3559 | 1.7099364 | 3.271464  | 394  |
| 2.012173  | 4.0338935 | INSIDE |          | 1.7911205 | 3.4608358 | 2215 |
| 1.8908973 | 3.7086582 | INSIDE | 141.5529 | 1.3617021 | 2.569882  | 1640 |
| 2.0090103 | 4.02506   | INSIDE | 481.1596 | 1.4158952 | 2.6682525 | 1019 |
| 2.453582  | 5.4777446 | INSIDE |          | 1.8248353 | 3.5426656 | 4550 |
| 2.009387  | 4.0261111 | INSIDE |          | 1.3175505 | 2.4924257 | 3511 |
| 2.397345  | 5.2683274 | INSIDE |          | 1.7191932 | 3.2925223 | 2587 |
| 2.4002235 | 5.2788494 | INSIDE |          | 1.6869015 | 3.2196447 | 2945 |
| 2.45373   | 5.4783066 | INSIDE |          |           |           |      |
| 2.1858952 | 4.5500904 | INSIDE | 142.43   | 1.6019658 | 3.0355665 | 1201 |
| 2.0589776 | 4.166909  | INSIDE |          | 1.6567494 | 3.153053  | 2882 |
| 2.4917276 | 5.6245107 | INSIDE | 104.266  | 2.3462937 | 5.0851619 | 1371 |
| 1.6368203 | 3.1097968 | INSIDE | 701.3575 | 1.5057576 | 2.8397375 | 2399 |
| 1.6548643 | 3.1489357 | INSIDE | 159.0191 |           |           |      |
| 1.7791009 | 3.4321222 | INSIDE | 319.5077 | 1.9409398 | 3.8395568 | 2511 |
| 2.2588167 | 4.7859877 | INSIDE | 2912.286 | 1.6418308 | 3.1206159 | 589  |
| 1.9035461 | 3.7413167 | INSIDE |          | 1.5772438 | 2.9839923 | 2624 |
| 2.430279  | 5.3899766 | INSIDE | 638.123  | 1.7669659 | 3.4033745 | 241  |
| 2.4541075 | 5.4797402 | INSIDE |          |           |           |      |
| 2.447306  | 5.4539671 | INSIDE | 158.1844 | 1.0963988 | 2.138203  | 4598 |
| 2.1066618 | 4.3069357 | INSIDE |          | 1.2389197 | 2.3602173 | 5437 |
| 1.9107355 | 3.7600074 | INSIDE | 122.1442 | 1.6518922 | 3.1424552 | 845  |
| 2.2915528 | 4.8958277 | INSIDE | 138.6192 | 1.1289269 | 2.1869601 | 5356 |
| 1.7211196 | 3.2969216 | INSIDE | 235.2921 | 1.4722805 | 2.7746013 | 692  |
| 1.9321479 | 3.8162294 | INSIDE | 583.9292 | 1.6631693 | 3.1671151 | 1870 |
| 1.9100791 | 3.7582971 | INSIDE | 1219.201 | 1.9352534 | 3.824453  | 657  |
| 2.910894  | 7.520841  | INSIDE |          | 2.0003107 | 4.0008615 | 2794 |
| 1.9975885 | 3.9933195 | INSIDE | 303.2093 | 1.9451027 | 3.8506519 | 2125 |
| 2.1861658 | 4.5509439 | INSIDE | 1742.264 | 1.837009  | 3.5726857 | 1148 |
| 2.050461  | 4.1423831 | INSIDE | 227.4205 | 1.4595286 | 2.7501849 | 1309 |
| 2.6986253 | 6.4918304 | INSIDE |          | 2.1564212 | 4.458076  | 3614 |
| 2.2505376 | 4.7586014 | INSIDE |          | 1.605379  | 3.0427567 | 3332 |
| 3.500966  | 11.321286 | INSIDE | 621.0236 | 2.7219076 | 6.5974458 | 561  |
| 2.0286016 | 4.0800918 | INSIDE | 229.0647 | 1.3458482 | 2.5417959 | 2053 |
| 2.2383254 | 4.7184905 | INSIDE | 915.2507 | 1.5473145 | 2.9227258 | 4706 |
| 2.0690737 | 4.1961717 | INSIDE | 282.4068 | 1.5923069 | 3.0153112 | 4788 |
| 2.0562034 | 4.158904  | INSIDE | 299.7747 |           |           |      |
| 2.325388  | 5.0120055 | INSIDE |          | 2.0490987 | 4.1384734 | 1157 |
| 1.9799756 | 3.9448641 | INSIDE |          | 1.4517678 | 2.7354303 | 4152 |
| 1.8505881 | 3.6064717 | INSIDE | 1189.601 | 1.558736  | 2.9459562 | 743  |
| 1.743193  | 3.3477528 | INSIDE |          | 1.7141398 | 3.2810096 | 950  |
| 1.9111425 | 3.7610683 | INSIDE | 457.1897 | 1.451353  | 2.7346439 | 1586 |
| 2.2601705 | 4.7904809 | INSIDE | 375.4656 | 1.5270799 | 2.8820191 | 2589 |
| 1.8656284 | 3.6442663 | INSIDE | 1382.266 | 1.6732917 | 3.1894147 | 391  |
| 1.8392049 | 3.5781278 | INSIDE | 1386.274 | 1.6635691 | 3.1679929 | 1584 |
| 2.1110528 | 4.3200643 | INSIDE | 107.5819 |           |           |      |
| 2.137539  | 4.4001082 | INSIDE | 104.4543 | 2.1643267 | 4.4825718 | 3510 |
| 2.5165167 | 5.7219889 | INSIDE | 172.5909 | 1.5825621 | 2.9950127 | 4080 |
| 1.8338512 | 3.5648743 | INSIDE | 240.8713 | 2.1904175 | 4.5643756 | 395  |
| 1.6130723 | 3.0590259 | INSIDE | 284.9974 | 1.4826607 | 2.7946366 | 1207 |
| 1.7113237 | 3.2746114 | INSIDE | 217.1827 | 1.672593  | 3.1878704 | 1308 |
| 1.6611392 | 3.1626616 | INSIDE | 246.5857 |           |           |      |
| 2.1380658 | 4.4017152 | INSIDE |          | 1.8611377 | 3.6329404 | 4429 |
| 2.2962942 | 4.9119443 | INSIDE | 5109.38  | 2.2014732 | 4.5994878 | 147  |
| 1.6079646 | 3.0482149 | INSIDE | 598.8149 | 1.4369891 | 2.7075521 | 1261 |

|           |           |        |          |           |           |      |
|-----------|-----------|--------|----------|-----------|-----------|------|
| 2.1072578 | 4.3087154 | INSIDE | 135.1942 | 1.4479718 | 2.7282423 | 1267 |
| 2.5629702 | 5.9092302 | INSIDE | 2412.541 | 1.809819  | 3.505983  | 792  |
| 2.2861145 | 4.8774075 | INSIDE | 1471.506 | 2.2652879 | 4.8075035 | 1703 |
| 2.0721369 | 4.2050906 | INSIDE | 221.2972 | 1.8091636 | 3.5043906 | 2731 |
| 1.9672248 | 3.9101523 | INSIDE | 401.9295 | 1.8821412 | 3.6862175 | 3041 |
| 2.0436678 | 4.1229238 | INSIDE | 358.3913 | 2.0296483 | 4.083053  | 376  |
| 2.0227492 | 4.0635741 | INSIDE | 178.4209 | 1.4509314 | 2.7338449 | 1469 |
| 1.714152  | 3.2810373 | INSIDE | 256.8859 | 1.2925341 | 2.4495795 | 3426 |
| 2.0573113 | 4.1620991 | INSIDE | 167.052  | 1.6230373 | 3.0802283 | 971  |
| 1.9630086 | 3.8987418 | INSIDE |          | 1.5579665 | 2.9443854 | 2982 |
| 2.0077906 | 4.0216586 | INSIDE | 189.2502 |           |           |      |
| 2.0049806 | 4.013833  | INSIDE | 113.8236 | 1.8665519 | 3.6465999 | 4030 |
| 1.6308427 | 3.0969384 | INSIDE |          | 1.3303916 | 2.5147092 | 5490 |
| 1.9636151 | 3.9003811 | INSIDE | 147.1695 | 1.6922262 | 3.2315497 | 182  |
| 2.3875856 | 5.232809  | INSIDE | 159.34   | 1.7723001 | 3.4159814 | 1735 |
| 2.290787  | 4.8932297 | INSIDE |          | 1.7921851 | 3.4633906 | 2965 |
| 1.7919959 | 3.4629364 | INSIDE |          | 1.9644647 | 3.9026787 | 1593 |
| 2.4441843 | 5.4421786 | INSIDE | 1586.311 |           |           |      |
| 2.406736  | 5.3027326 | INSIDE | 109.4401 | 1.618027  | 3.0695496 | 4189 |
| 2.0538433 | 4.1521061 | INSIDE |          | 1.3341509 | 2.5212705 | 1976 |
| 2.1813653 | 4.535826  | INSIDE | 1576.65  | 1.5632446 | 2.9551771 | 2477 |
| 1.6201502 | 3.0740704 | INSIDE | 134.7203 | 1.6158732 | 3.0649705 | 1621 |
| 1.8022598 | 3.487661  | INSIDE | 1075.283 |           |           |      |
| 1.9093935 | 3.7565115 | INSIDE | 312.9607 |           |           |      |
| 2.1814058 | 4.5359533 | INSIDE |          |           |           |      |
| 1.7418    | 3.3445219 | INSIDE | 153.828  |           |           |      |
| 2.8810503 | 7.3668624 | INSIDE |          | 1.6863095 | 3.2183238 | 4038 |
| 2.135145  | 4.3928127 | INSIDE | 227.084  | 1.5823809 | 2.9946365 | 3368 |
| 1.6270512 | 3.0888101 | INSIDE | 1144.016 | 1.5510637 | 2.9303311 | 816  |
| 2.551656  | 5.8630689 | INSIDE | 281.5546 | 1.7578413 | 3.3819171 | 3971 |
| 1.9925634 | 3.9794344 | INSIDE | 264.2571 | 2.0720553 | 4.2048528 | 1405 |
| 1.855987  | 3.6199932 | INSIDE |          |           |           |      |
| 2.056027  | 4.1583956 | INSIDE | 198.7097 | 1.6030527 | 3.0378543 | 1736 |
| 2.3673458 | 5.1599096 | INSIDE | 1733.646 | 2.0060751 | 4.0168793 | 1312 |
| 1.832019  | 3.5603498 | INSIDE | 765.7555 | 1.4214642 | 2.6785722 | 4088 |
| 1.9878975 | 3.9665851 | INSIDE | 161.3041 |           |           |      |
| 2.265206  | 4.8072306 | INSIDE |          | 1.2726252 | 2.4160079 | 4073 |
| 1.8904998 | 3.7076365 | INSIDE | 662.0906 | 1.9690499 | 3.915102  | 138  |
| 2.6319206 | 6.1985063 | INSIDE | 1149.458 | 2.3872025 | 5.2314196 | 201  |
| 2.486824  | 5.6054259 | INSIDE | 2604.21  | 1.7586411 | 3.3837925 | 1944 |
| 1.817576  | 3.5248845 | INSIDE |          | 1.3999164 | 2.6388629 | 2721 |
| 1.662991  | 3.1667237 | INSIDE | 198.2827 | 1.5307918 | 2.8894438 | 763  |
| 2.1891248 | 4.5602876 | INSIDE |          | 1.7993305 | 3.4805867 | 5553 |
| 2.375782  | 5.1901707 | INSIDE |          | 1.9124386 | 3.7644487 | 1730 |
| 1.9518875 | 3.8688036 | INSIDE |          |           |           |      |
| 1.9096594 | 3.7572039 | INSIDE | 415.7237 | 1.9007456 | 3.7340613 | 1488 |
| 1.7780238 | 3.4295607 | INSIDE | 532.393  | 1.2418519 | 2.3650192 | 5488 |
| 1.7949364 | 3.4700018 | INSIDE | 225.8578 | 1.828006  | 3.5504601 | 167  |
| 2.377895  | 5.1977779 | INSIDE | 1060.592 | 2.7961192 | 6.9456957 | 32   |
| 2.0615914 | 4.1744653 | INSIDE |          |           |           |      |
| 2.2966616 | 4.9131953 | INSIDE | 1350.177 | 1.7003417 | 3.2497792 | 4704 |
| 2.2486296 | 4.7523121 | INSIDE | 641.6601 | 1.9089124 | 3.755259  | 1234 |
| 1.6776204 | 3.1989987 | INSIDE |          | 1.4697598 | 2.7697577 | 5133 |
| 1.9658931 | 3.9065446 | INSIDE | 231.8215 | 1.0289881 | 2.0405925 | 3758 |
| 1.997765  | 3.9938081 | INSIDE | 235.5584 | 1.2404469 | 2.3627171 | 5280 |
| 2.3174615 | 4.9845439 | INSIDE |          | 1.4828347 | 2.7949737 | 4707 |
| 1.6645298 | 3.1701032 | INSIDE | 276.8564 | 1.6417198 | 3.1203758 | 1938 |
| 2.1628017 | 4.477836  | INSIDE | 528.351  | 2.0608213 | 4.1722375 | 614  |



|           |           |        |          |           |           |      |
|-----------|-----------|--------|----------|-----------|-----------|------|
| 1.9635094 | 3.9000954 | INSIDE | 360.0823 | 1.6544755 | 3.1480872 | 1857 |
| 1.8256518 | 3.5446712 | INSIDE | 340.476  |           |           |      |
| 1.7108598 | 3.2735586 | INSIDE | 99.69802 |           |           |      |
| 2.1745281 | 4.5143807 | INSIDE | 195.0561 | 1.4329389 | 2.6999616 | 1104 |
| 1.7257812 | 3.3075918 | INSIDE |          | 1.7308847 | 3.3193131 | 1479 |
| 2.5868006 | 6.0076493 | INSIDE |          | 2.3012373 | 4.9288029 | 654  |
| 2.4587188 | 5.4972832 | INSIDE | 122.0674 | 1.4680332 | 2.7664449 | 1533 |
| 1.8685336 | 3.6516123 | INSIDE |          | 1.4495113 | 2.7311552 | 2198 |
| 2.2102656 | 4.6276046 | INSIDE |          | 1.2416877 | 2.36475   | 3429 |
| 1.7024304 | 3.2544876 | INSIDE |          | 1.2739968 | 2.418306  | 2938 |
| 2.041819  | 4.1176437 | INSIDE | 167.4206 | 1.7995754 | 3.4811776 | 722  |
| 2.4918973 | 5.6251724 | INSIDE | 614.3368 |           |           |      |
| 3.2335513 | 9.4058042 | INSIDE | 367.0393 | 2.182392  | 4.5390551 | 4528 |
| 1.6689682 | 3.1798709 | INSIDE | 148.1381 | 1.5518647 | 2.9319585 | 2300 |
| 2.2561023 | 4.7769915 | INSIDE | 141.4222 | 2.5480146 | 5.848289  | 4404 |
| 2.285812  | 4.8763849 | INSIDE | 123.258  | 1.4104297 | 2.6581632 | 5019 |
| 2.2806258 | 4.8588867 | INSIDE |          | 1.409163  | 2.6558304 | 4094 |
| 2.0981016 | 4.2814563 | INSIDE |          |           |           |      |
| 2.230995  | 4.6945764 | INSIDE | 244.243  | 2.041831  | 4.117678  | 710  |
| 1.9871949 | 3.9646538 | INSIDE | 165.1578 | 1.8817328 | 3.6851742 | 1716 |
| 2.41205   | 5.3223006 | INSIDE | 111.9716 |           |           |      |
| 1.8714075 | 3.6588937 | INSIDE | 132.0916 | 1.8009678 | 3.484539  | 4992 |
| 1.8802998 | 3.6815156 | INSIDE | 492.186  | 1.7227019 | 3.3005396 | 4690 |
| 2.2196841 | 4.6579143 | INSIDE | 339.4189 | 2.0452697 | 4.1275042 | 1793 |
| 1.6920954 | 3.2312568 | INSIDE | 134.7012 | 1.4565349 | 2.7444839 | 1757 |
| 2.0661838 | 4.1877746 | INSIDE | 460.7122 |           |           |      |
| 2.1111655 | 4.3204018 | INSIDE | 137.7458 | 1.6600883 | 3.1603587 | 3808 |
| 2.221476  | 4.6637033 | INSIDE | 356.6858 | 1.7105967 | 3.2729617 | 481  |
| 1.8039514 | 3.4917527 | INSIDE | 180.6135 |           |           |      |
| 2.7071412 | 6.5302635 | INSIDE |          | 2.2155144 | 4.6444714 | 5247 |
| 2.0364606 | 4.1023785 | INSIDE | 258.5777 | 1.5346535 | 2.8971884 | 2006 |
| 2.0642953 | 4.1822964 | INSIDE |          | 2.0045373 | 4.0125999 | 1038 |
| 1.8107126 | 3.5081553 | INSIDE | 494.5312 | 1.6644017 | 3.1698217 | 5258 |
| 2.2372768 | 4.7150622 | INSIDE | 529.2032 | 1.3567777 | 2.5611251 | 2951 |
| 1.9320061 | 3.8158543 | INSIDE |          | 1.8329017 | 3.5625289 | 2696 |
| 1.8587837 | 3.6270175 | INSIDE |          | 1.5476646 | 2.9234352 | 1832 |
| 1.6754515 | 3.194193  | INSIDE |          | 1.855507  | 3.618789  | 3238 |
| 1.8289956 | 3.5528963 | INSIDE |          | 1.7689371 | 3.4080278 | 811  |
| 1.7085471 | 3.2683151 | INSIDE | 204.069  | 1.2454023 | 2.3708466 | 3316 |
| 1.5945159 | 3.0199317 | INSIDE | 157.3345 | 2.1153967 | 4.3330915 | 3738 |
| 2.190481  | 4.5645765 | INSIDE | 161.6137 | 1.4233019 | 2.6819864 | 4582 |
| 2.4605322 | 5.5041974 | INSIDE | 491.1941 | 2.0234115 | 4.06544   | 43   |
| 1.7544245 | 3.373917  | INSIDE |          |           |           |      |
| 2.0948722 | 4.2718832 | INSIDE | 445.2722 | 2.0171292 | 4.0477753 | 820  |
| 1.825166  | 3.5434778 | INSIDE |          | 1.5042772 | 2.8368251 | 4435 |
| 1.6431049 | 3.1233731 | INSIDE |          | 1.635613  | 3.1071955 | 5497 |
| 2.3050435 | 4.9418236 | INSIDE |          | 1.7102783 | 3.2722394 | 4923 |
| 1.7650217 | 3.3987911 | INSIDE |          | 1.4280496 | 2.6908269 | 2281 |
| 1.8616427 | 3.6342123 | INSIDE | 1284.036 | 1.6657163 | 3.1727114 | 1697 |
| 1.59829   | 3.0278422 | INSIDE | 670.5199 | 1.718466  | 3.2908631 | 1263 |
| 1.9089674 | 3.7554021 | INSIDE |          | 1.5134461 | 2.8549117 | 2899 |
| 2.094506  | 4.270799  | INSIDE | 205.4377 | 1.6186458 | 3.0708665 | 3538 |
| 2.1213636 | 4.35105   | INSIDE |          | 1.4751436 | 2.7801131 | 5461 |
| 2.049435  | 4.1394383 | INSIDE | 605.1424 | 1.8750905 | 3.6682463 | 414  |
| 2.2831314 | 4.8673327 | INSIDE | 160.5593 | 2.5377662 | 5.806892  | 2036 |
| 2.0286796 | 4.0803124 | INSIDE |          | 1.7908854 | 3.4602719 | 1172 |
| 2.1382937 | 4.4024106 | INSIDE | 111.0506 | 1.9032733 | 3.7406093 | 1252 |
| 1.9710017 | 3.9204023 | INSIDE |          |           |           |      |

|           |           |        |          |           |           |      |
|-----------|-----------|--------|----------|-----------|-----------|------|
| 2.3702176 | 5.1701911 | INSIDE |          | 1.6074286 | 3.0470826 | 4569 |
| 2.6087508 | 6.0997529 | INSIDE | 150.8428 |           |           |      |
| 2.670351  | 6.3658405 | INSIDE | 162.9456 | 1.1960222 | 2.2910711 | 5018 |
| 1.707011  | 3.2648371 | INSIDE | 185.5626 | 1.3897786 | 2.6203846 | 3635 |
| 1.707022  | 3.264862  | INSIDE |          | 1.4518801 | 2.7356432 | 3627 |
| 2.2982442 | 4.918588  | INSIDE | 990.1385 | 2.0053844 | 4.0149566 | 630  |
| 1.8670772 | 3.6479279 | INSIDE | 140.063  |           |           |      |
| 1.5911664 | 3.0129284 | INSIDE | 228.6656 | 2.0666947 | 4.1892579 | 50   |
| 2.0115418 | 4.032129  | INSIDE | 169.411  |           |           |      |
| 1.7273335 | 3.3111526 | INSIDE | 162.4772 | 1.3775835 | 2.5983279 | 2274 |
| 2.3785224 | 5.2000388 | INSIDE | 306.709  | 1.5405514 | 2.9090567 | 2212 |
| 1.6251583 | 3.0847601 | INSIDE |          | 1.9222951 | 3.7902555 | 1011 |
| 2.458705  | 5.4972306 | INSIDE | 358.0562 | 2.4267154 | 5.3766792 | 732  |
| 2.648813  | 6.2715107 | INSIDE | 130.5323 | 1.2169561 | 2.3245575 | 2123 |
| 2.6696794 | 6.3628777 | INSIDE | 160.3699 | 1.6610583 | 3.1624843 | 794  |
| 1.8770573 | 3.6732505 | INSIDE |          | 1.648627  | 3.1353511 | 4139 |
| 2.3233986 | 5.005099  | INSIDE |          | 1.6357378 | 3.1074643 | 1370 |
| 2.8799043 | 7.3610129 | INSIDE | 460.5432 | 2.1611984 | 4.4728625 | 2888 |
| 1.8047177 | 3.4936079 | INSIDE | 208.6709 |           |           |      |
| 1.8499573 | 3.6048952 | INSIDE | 1006.765 | 1.8656842 | 3.6444073 | 1559 |
| 1.7580549 | 3.3824179 | INSIDE |          | 1.5689131 | 2.9668112 | 5153 |
| 1.604605  | 3.0411248 | INSIDE | 259.7194 | 2.1085508 | 4.3125787 | 2090 |
| 1.925177  | 3.7978344 | INSIDE |          | 1.6963859 | 3.2408807 | 1237 |
| 2.2476716 | 4.7491575 | INSIDE | 503.5141 | 1.421786  | 2.6791698 | 4154 |
| 2.1064394 | 4.3062719 | INSIDE | 219.4057 | 1.9891231 | 3.9699562 | 1222 |
| 1.8749218 | 3.6678174 | INSIDE | 152.0086 | 2.07237   | 4.2057701 | 1300 |
| 1.7852706 | 3.4468311 | INSIDE | 223.5523 |           |           |      |
| 1.6794238 | 3.203     | INSIDE | 585.3769 | 1.3424902 | 2.5358865 | 5338 |
| 1.8561738 | 3.620462  | INSIDE | 102.2358 | 2.0400317 | 4.1125457 | 2440 |
| 1.8212541 | 3.5338826 | INSIDE | 506.1591 | 1.5165522 | 2.8610649 | 1415 |
| 2.0598226 | 4.1693503 | INSIDE |          | 1.924564  | 3.796221  | 2462 |
| 1.68724   | 3.2204002 | INSIDE |          | 1.9023422 | 3.738196  | 417  |
| 1.6669954 | 3.1755256 | INSIDE | 151.3637 | 1.5372019 | 2.9023106 | 3968 |
| 2.102575  | 4.2947525 | INSIDE |          | 1.6885642 | 3.2233575 | 5357 |
| 2.1947913 | 4.5782343 | INSIDE | 149.2207 | 1.8640085 | 3.6401767 | 366  |
| 2.0437086 | 4.1230404 | INSIDE | 138.9123 | 1.1420795 | 2.2069891 | 3551 |
| 2.0801423 | 4.2284892 | INSIDE | 1215.954 | 2.1357715 | 4.3947208 | 2375 |
| 2.0655556 | 4.1859515 | INSIDE |          | 1.6561717 | 3.1517906 | 718  |
| 2.3515813 | 5.1038336 | INSIDE | 225.0372 |           |           |      |
| 1.9741199 | 3.9288849 | INSIDE |          | 1.6842141 | 3.2136529 | 3036 |
| 2.3163006 | 4.9805346 | INSIDE |          | 1.6202816 | 3.0743504 | 2186 |
| 1.8591393 | 3.6279116 | INSIDE | 148.0294 | 1.4078002 | 2.6533228 | 4627 |
| 1.6168541 | 3.0670551 | INSIDE | 143.7429 | 1.4269826 | 2.6888376 | 997  |
| 2.0052907 | 4.0146959 | INSIDE | 191.748  | 1.6343507 | 3.104478  | 3830 |
| 2.6801927 | 6.4094151 | INSIDE | 104.3269 | 1.1647909 | 2.2420072 | 3028 |
| 2.560257  | 5.8981275 | INSIDE | 368.1257 | 1.633387  | 3.1024049 | 3990 |
| 1.9373981 | 3.8301426 | INSIDE | 178.712  | 1.9451602 | 3.8508054 | 355  |
| 1.751091  | 3.3661302 | INSIDE | 138.3773 | 1.5873121 | 3.0048898 | 2115 |
| 2.2432926 | 4.7347643 | INSIDE | 1589.305 | 1.7273674 | 3.3112304 | 1458 |
| 2.0593433 | 4.1679654 | INSIDE | 240.51   | 1.5460453 | 2.9201557 | 1180 |
| 2.228193  | 4.6854675 | INSIDE |          |           |           |      |
| 2.2396877 | 4.7229482 | INSIDE | 367.7047 | 1.3956901 | 2.6311438 | 1063 |
| 1.6258079 | 3.0861494 | INSIDE |          | 1.0888844 | 2.1270949 | 1790 |
| 1.803113  | 3.4897241 | INSIDE | 432.0766 | 1.9387378 | 3.8337009 | 1791 |
| 2.1534765 | 4.4489858 | INSIDE |          |           |           |      |
| 2.1153584 | 4.3329765 | INSIDE | 142.2499 |           |           |      |
| 2.1491008 | 4.4355125 | INSIDE |          | 1.5563154 | 2.9410176 | 5536 |
| 1.9926265 | 3.9796085 | INSIDE | 2410.226 | 2.4123018 | 5.3232296 | 319  |

|           |           |        |          |           |           |      |
|-----------|-----------|--------|----------|-----------|-----------|------|
| 2.2913663 | 4.8951949 | INSIDE | 112.6198 | 1.704442  | 3.2590286 | 989  |
| 1.9878213 | 3.9663756 | INSIDE |          | 1.3031955 | 2.4677487 | 5263 |
| 2.6675043 | 6.3532919 | INSIDE |          | 2.067478  | 4.191533  | 4120 |
| 2.2224503 | 4.6668539 | INSIDE | 2348.839 | 1.8788619 | 3.6778481 | 2997 |
| 2.1663888 | 4.4889835 | INSIDE | 190.356  | 1.7983297 | 3.478173  | 3270 |
| 2.7338161 | 6.6521288 | INSIDE | 283.914  |           |           |      |
| 1.7541777 | 3.3733399 | INSIDE | 140.5875 | 1.5789559 | 2.9875356 | 2678 |
| 1.8158194 | 3.5205953 | INSIDE | 234.7074 | 1.6409799 | 3.1187759 | 1967 |
| 1.7070532 | 3.2649326 | INSIDE |          | 1.0963402 | 2.1381161 | 580  |
| 1.9933312 | 3.9815528 | INSIDE | 1146.003 | 1.5094641 | 2.8470426 | 5124 |
| 1.7925454 | 3.4642557 | INSIDE |          | 1.2906721 | 2.44642   | 5216 |
| 2.5510168 | 5.8604717 | INSIDE | 1073.399 | 2.2808099 | 4.8595068 | 1091 |
| 2.1365397 | 4.3970615 | INSIDE | 213.7717 | 1.9672107 | 3.9101141 | 1326 |
| 2.3348505 | 5.0449868 | INSIDE | 1830.017 | 1.8743527 | 3.6663708 | 288  |
| 2.4609559 | 5.5058141 | INSIDE | 626.4592 | 1.6745119 | 3.1921134 | 3309 |
| 1.5880461 | 3.006419  | INSIDE | 1341.14  | 1.4105557 | 2.6583954 | 1527 |
| 1.9911331 | 3.9754911 | INSIDE | 115.1319 |           |           |      |
| 1.9151881 | 3.7716299 | INSIDE |          |           |           |      |
| 2.1615858 | 4.4740637 | INSIDE |          | 1.9352812 | 3.8245266 | 5395 |
| 2.1287878 | 4.3734985 | INSIDE |          | 1.9358317 | 3.8259863 | 142  |
| 1.9277647 | 3.8046525 | INSIDE |          | 1.6362401 | 3.1085464 | 4216 |
| 1.9697367 | 3.9169663 | INSIDE | 561.0519 |           |           |      |
| 2.3439343 | 5.0768523 | INSIDE |          |           |           |      |
| 1.8020543 | 3.4871642 | INSIDE | 324.0102 | 1.698673  | 3.2460225 | 1776 |
| 2.0139894 | 4.0389755 | INSIDE | 332.4879 |           |           |      |
| 2.108084  | 4.3111836 | INSIDE | 128.3496 | 1.7453879 | 3.3528499 | 2616 |
| 2.377703  | 5.1970862 | INSIDE |          | 2.076248  | 4.2170906 | 4135 |
| 2.024534  | 4.0686044 | INSIDE | 130.0281 | 1.4831177 | 2.795522  | 4988 |
| 1.9063998 | 3.7487245 | INSIDE | 593.7841 | 2.6296394 | 6.1887129 | 650  |
| 2.0429618 | 4.1209067 | INSIDE |          | 1.9145389 | 3.769933  | 3794 |
| 1.9526397 | 3.8708213 | INSIDE | 1044.739 | 1.43181   | 2.6978497 | 5308 |
| 1.7186937 | 3.2913825 | INSIDE | 435.9021 | 1.8100343 | 3.5065063 | 1153 |
| 1.9198709 | 3.783892  | INSIDE |          | 1.5831276 | 2.9961869 | 1625 |
| 2.1891334 | 4.5603147 | INSIDE |          | 1.7661957 | 3.401558  | 855  |
| 1.7403907 | 3.3412564 | INSIDE | 1557.984 | 1.940196  | 3.8375778 | 2095 |
| 1.9423997 | 3.8434441 | INSIDE |          | 1.9435226 | 3.8464368 | 3867 |
| 2.2076719 | 4.6192925 | INSIDE |          | 1.6407636 | 3.1183084 | 451  |
| 2.2403953 | 4.7252652 | INSIDE |          | 1.2699003 | 2.411449  | 5552 |
| 2.2329595 | 4.7009733 | INSIDE | 115.7455 | 1.7319763 | 3.3218255 | 756  |
| 1.7066139 | 3.2639386 | INSIDE |          | 1.4673084 | 2.7650554 | 4443 |
| 1.611701  | 3.0561196 | INSIDE | 596.14   | 1.7767758 | 3.4265953 | 522  |
| 2.4204638 | 5.353431  | INSIDE | 86.2289  |           |           |      |
| 1.9692258 | 3.9155794 | INSIDE |          | 1.6576375 | 3.1549945 | 4316 |
| 1.9536117 | 3.8734301 | INSIDE | 162.1541 | 1.1332144 | 2.1934691 | 4591 |
| 2.0211196 | 4.0589867 | INSIDE | 365.362  | 1.7481312 | 3.3592314 | 5398 |
| 1.9848131 | 3.9581138 | INSIDE | 744.936  | 1.6726711 | 3.188043  | 767  |
| 2.2480912 | 4.750539  | INSIDE |          |           |           |      |
| 2.326798  | 5.0169063 | INSIDE | 116.2639 |           |           |      |
| 1.8581791 | 3.6254978 | INSIDE | 389.3897 | 1.9655862 | 3.9057137 | 1725 |
| 1.7115769 | 3.2751861 | INSIDE | 219.2823 | 1.6793528 | 3.2028424 | 2614 |
| 2.1799588 | 4.5314061 | INSIDE | 793.9299 | 1.5900004 | 3.0104943 | 4759 |
| 2.1084177 | 4.3121809 | INSIDE |          | 2.0534651 | 4.1510177 | 776  |
| 1.8143313 | 3.5169658 | INSIDE | 232.284  | 1.5066884 | 2.8415703 | 2112 |
| 1.6934294 | 3.234246  | INSIDE |          | 1.2363114 | 2.355954  | 5346 |
| 2.3405678 | 5.0650194 | INSIDE | 1647.264 | 1.5018154 | 2.8319885 | 5132 |
| 2.2691028 | 4.8202327 | INSIDE | 404.2263 | 1.5719705 | 2.9731052 | 2901 |
| 2.8411815 | 7.1660668 | INSIDE | 194.0461 | 2.3968515 | 5.2665256 | 3390 |
| 2.1115851 | 4.3216586 | INSIDE | 418.8553 | 1.4910372 | 2.8109099 | 875  |

|           |           |        |          |           |           |      |
|-----------|-----------|--------|----------|-----------|-----------|------|
| 1.8680211 | 3.6503153 | INSIDE | 127.3453 | 1.5027765 | 2.8338757 | 4271 |
| 2.5456967 | 5.8389004 | INSIDE |          | 2.0785294 | 4.2237645 | 158  |
| 2.1146507 | 4.3308515 | INSIDE | 260.3969 |           |           |      |
| 1.9618753 | 3.8956803 | INSIDE | 124.2029 | 1.4050602 | 2.6482883 | 825  |
| 1.8652503 | 3.6433114 | INSIDE | 329.893  | 1.5421352 | 2.912252  | 3048 |
| 1.5985931 | 3.0284784 | INSIDE | 754.2505 | 1.5535733 | 2.9354329 | 2655 |
| 1.6831826 | 3.211356  | INSIDE |          | 1.7697788 | 3.4100167 | 5031 |
| 1.9409529 | 3.8395917 | INSIDE | 168.2331 |           |           |      |
| 2.067387  | 4.1912687 | INSIDE |          |           |           |      |
| 2.4015343 | 5.2836478 | INSIDE | 269.9008 | 1.6844889 | 3.2142651 | 4475 |
| 1.9346542 | 3.8228649 | INSIDE | 1312.461 | 1.6474577 | 3.1328109 | 3047 |
| 1.710995  | 3.2738654 | INSIDE | 1153.444 | 1.3518732 | 2.5524332 | 4157 |
| 2.6506314 | 6.2794204 | INSIDE |          | 1.572155  | 2.9734854 | 576  |
| 1.6432934 | 3.1237812 | INSIDE | 176.7251 | 1.4089274 | 2.6553967 | 3649 |
| 2.0740783 | 4.2107531 | INSIDE | 283.124  | 2.065027  | 4.1844181 | 59   |
| 2.693221  | 6.4675576 | INSIDE | 1247.747 |           |           |      |
| 2.474797  | 5.5588906 | INSIDE |          | 1.4748194 | 2.7794885 | 4976 |
| 2.1370168 | 4.3985158 | INSIDE |          | 1.8495307 | 3.6038294 | 2427 |
| 1.9856194 | 3.9603266 | INSIDE | 1326.651 | 1.5533035 | 2.934884  | 1520 |
| 1.9079406 | 3.7527303 | INSIDE |          | 2.2481337 | 4.7506789 | 1680 |
| 1.6611239 | 3.1626281 | INSIDE | 117.2715 | 1.2076545 | 2.3096184 | 1227 |
| 2.2621484 | 4.7970531 | INSIDE | 782.1717 | 1.6543175 | 3.1477424 | 3829 |
| 2.0755086 | 4.2149298 | INSIDE |          | 1.6497943 | 3.137889  | 1792 |
| 1.7315997 | 3.3209585 | INSIDE | 113.1315 | 2.1003554 | 4.2881501 | 3068 |
| 2.1075659 | 4.3096356 | INSIDE | 131.9044 | 2.3007774 | 4.927232  | 2428 |
| 2.6604288 | 6.3222093 | INSIDE | 272.2661 | 1.1740292 | 2.2564099 | 5393 |
| 2.2781658 | 4.8506087 | INSIDE | 125.9242 | 1.3266737 | 2.508237  | 4103 |
| 2.1410065 | 4.4106965 | INSIDE | 136.1078 | 1.7479236 | 3.3587481 | 4240 |
| 2.3249679 | 5.0105463 | INSIDE | 1040.729 | 1.1164834 | 2.1681783 | 2740 |
| 2.6268706 | 6.176847  | INSIDE |          | 2.401261  | 5.282647  | 347  |
| 1.7966578 | 3.4741446 | INSIDE | 203.5186 | 1.2675384 | 2.4075043 | 3224 |
| 1.8376793 | 3.574346  | INSIDE | 491.6797 | 1.4412707 | 2.7155995 | 2235 |
| 2.132596  | 4.3850582 | INSIDE | 148.198  |           |           |      |
| 2.213095  | 4.6366891 | INSIDE | 978.074  |           |           |      |
| 2.1201708 | 4.3474541 | INSIDE |          |           |           |      |
| 1.6348803 | 3.1056178 | INSIDE | 126.3384 |           |           |      |
| 1.6191355 | 3.071909  | INSIDE | 405.101  | 1.0793864 | 2.1131371 | 4641 |
| 1.7068295 | 3.2644264 | INSIDE |          | 1.7262992 | 3.3087796 | 1240 |
| 2.1762078 | 4.5196398 | INSIDE |          | 1.7555873 | 3.3766375 | 4027 |
| 1.906451  | 3.7488575 | INSIDE | 219.6171 |           |           |      |
| 2.5636332 | 5.9119464 | INSIDE | 392.6774 | 1.932895  | 3.8182062 | 5360 |
| 1.965801  | 3.9062953 | INSIDE |          | 1.7122864 | 3.2767972 | 670  |
| 2.6655958 | 6.3448928 | INSIDE | 138.0582 | 1.6829594 | 3.2108592 | 2914 |
| 1.920386  | 3.7852432 | INSIDE | 3209.297 |           |           |      |
| 1.7563845 | 3.3785039 | INSIDE | 890.3903 |           |           |      |
| 2.321057  | 4.9969819 | INSIDE |          | 1.4767853 | 2.7832785 | 1558 |
| 2.4602785 | 5.5032295 | INSIDE | 225.1934 | 1.7828726 | 3.4411066 | 2706 |
| 2.6690176 | 6.3599596 | INSIDE | 186.7518 | 2.11241   | 4.3241303 | 1016 |
| 2.020339  | 4.0567911 | INSIDE | 485.6274 | 1.8275268 | 3.549281  | 782  |
| 2.0567713 | 4.1605415 | INSIDE | 94.82884 | 1.8041227 | 3.4921674 | 4273 |
| 2.18214   | 4.5382623 | INSIDE | 161.541  |           |           |      |
| 2.2436004 | 4.7357745 | INSIDE | 488.2792 | 1.1086688 | 2.1564657 | 4343 |
| 2.257434  | 4.781403  | INSIDE |          | 2.154612  | 4.4524889 | 1714 |
| 2.5515375 | 5.8625873 | INSIDE |          |           |           |      |
| 2.0364707 | 4.1024072 | INSIDE | 213.7835 | 1.6327008 | 3.1009297 | 3094 |
| 2.0188153 | 4.0525087 | INSIDE | 549.7452 | 1.7161249 | 3.2855272 | 885  |
| 1.8071353 | 3.4994672 | INSIDE |          |           |           |      |
| 1.8736931 | 3.6646949 | INSIDE |          |           |           |      |

|           |           |        |          |           |           |      |
|-----------|-----------|--------|----------|-----------|-----------|------|
| 1.7424783 | 3.3460948 | INSIDE | 297.3723 | 1.7604263 | 3.3879822 | 1476 |
| 1.9640664 | 3.9016014 | INSIDE |          |           |           |      |
| 2.1677144 | 4.4931101 | INSIDE | 773.3401 |           |           |      |
| 2.227134  | 4.6820294 | INSIDE |          | 1.8699441 | 3.6551842 | 1897 |
| 2.395635  | 5.2620866 | INSIDE |          |           |           |      |
| 2.0718882 | 4.2043658 | INSIDE |          |           |           |      |
| 2.4115608 | 5.3204962 | INSIDE | 855.6252 | 1.7343843 | 3.3273746 | 2497 |
| 2.3020613 | 4.9316188 | INSIDE |          | 1.8755558 | 3.6694296 | 2904 |
| 2.1452742 | 4.4237633 | INSIDE | 1091.339 | 1.979798  | 3.9443785 | 1189 |
| 2.1930408 | 4.5726827 | INSIDE | 1991.075 | 2.1375782 | 4.4002278 | 977  |
| 1.7975961 | 3.4764048 | INSIDE | 451.2268 |           |           |      |
| 1.6655589 | 3.1723653 | INSIDE | 93.89393 | 1.4305822 | 2.6955547 | 4882 |
| 2.0990438 | 4.2842534 | INSIDE | 1223.944 | 1.7627441 | 3.3934296 | 2475 |
| 2.0063672 | 4.0176926 | INSIDE |          | 1.9789081 | 3.9419462 | 1105 |
| 2.5598779 | 5.8965778 | INSIDE | 292.0179 | 2.002532  | 4.0070264 | 3838 |
| 2.5666552 | 5.9243431 | INSIDE | 751.8943 | 2.0211751 | 4.0591428 | 1664 |
| 2.0802398 | 4.228775  | INSIDE | 136.694  |           |           |      |
| 1.7474504 | 3.3576466 | INSIDE | 1986.798 | 1.8151122 | 3.51887   | 854  |
| 1.7218902 | 3.2986831 | INSIDE |          | 1.6122242 | 3.0572281 | 2101 |
| 1.9119906 | 3.7632799 | INSIDE |          |           |           |      |
| 1.7897292 | 3.4574999 | INSIDE | 279.2242 | 1.6616243 | 3.1637252 | 1181 |
| 2.4666882 | 5.527734  | INSIDE | 1774.27  | 1.9488636 | 3.8607031 | 1260 |
| 2.056066  | 4.158508  | INSIDE | 153.994  | 1.0041662 | 2.0057839 | 2732 |
| 2.2170708 | 4.6494846 | INSIDE | 753.1589 | 2.1390536 | 4.40473   | 734  |
| 2.3052163 | 4.9424155 | INSIDE | 568.4229 | 1.7254444 | 3.3068197 | 3179 |
| 2.2573607 | 4.78116   | INSIDE | 1064.532 | 1.6238911 | 3.0820518 | 4815 |
| 2.103248  | 4.2967564 | INSIDE | 979.2507 | 2.2715964 | 4.8285714 | 1795 |
| 2.3320472 | 5.0351934 | INSIDE | 337.737  | 1.7315093 | 3.3207504 | 4478 |
| 2.2766497 | 4.845514  | INSIDE | 1081.212 | 1.919989  | 3.7842017 | 1169 |
| 2.052016  | 4.1468504 | INSIDE |          |           |           |      |
| 2.5347848 | 5.7949042 | INSIDE | 205.9518 | 2.064172  | 4.1819389 | 663  |
| 2.1169744 | 4.3378327 | INSIDE | 955.2878 | 1.6531825 | 3.145267  | 3967 |
| 2.177599  | 4.5240002 | INSIDE | 195.0457 | 1.728012  | 3.3127102 | 1128 |
| 1.9237969 | 3.7942031 | INSIDE | 230.0502 | 2.0898156 | 4.2569366 | 3132 |
| 1.8656621 | 3.6443515 | INSIDE | 194.6246 | 1.8949046 | 3.7189738 | 1610 |
| 1.7057285 | 3.2619361 | INSIDE |          |           |           |      |
| 1.6871073 | 3.220104  | INSIDE |          | 1.5704993 | 2.9700749 | 3793 |
| 1.7671707 | 3.4038576 | INSIDE | 287.4104 | 1.1658033 | 2.243581  | 1094 |
| 1.9011002 | 3.7349792 | INSIDE | 142.8392 | 1.7843553 | 3.444645  | 4158 |
| 1.6636633 | 3.1681998 | INSIDE | 870.2985 | 1.637486  | 3.111232  | 1691 |
| 1.7566415 | 3.3791057 | INSIDE | 2013.259 |           |           |      |
| 1.9854432 | 3.9598429 | INSIDE | 107.7566 | 1.7692224 | 3.4087018 | 2656 |
| 1.9738979 | 3.9282804 | INSIDE | 307.8217 | 1.8742936 | 3.6662206 | 4843 |
| 1.8887938 | 3.7032548 | INSIDE |          | 1.8204744 | 3.5319732 | 2192 |
| 1.7017766 | 3.253013  | INSIDE | 138.5568 |           |           |      |
| 2.2033453 | 4.6054601 | INSIDE | 107.6844 | 1.8426378 | 3.5866521 | 4527 |
| 1.9508903 | 3.8661304 | INSIDE | 1610.523 | 1.8769519 | 3.6729822 | 385  |
| 2.3870568 | 5.2308913 | INSIDE |          | 1.9152822 | 3.7718759 | 1836 |
| 2.331739  | 5.0341179 | INSIDE | 299.4342 |           |           |      |
| 1.8232826 | 3.5388549 | INSIDE | 88.45199 | 1.794512  | 3.4689811 | 3728 |
| 2.0639322 | 4.1812439 | INSIDE | 161.9649 | 1.605204  | 3.0423877 | 1818 |
| 1.6824168 | 3.2096518 | INSIDE |          | 1.4750531 | 2.7799388 | 4394 |
| 2.0786014 | 4.2239753 | INSIDE |          | 1.5759434 | 2.9813038 | 2939 |
| 2.4392517 | 5.4236035 | INSIDE | 130.1975 | 2.1272502 | 4.3688398 | 146  |
| 1.6214635 | 3.07687   | INSIDE | 220.6787 |           |           |      |
| 2.6837907 | 6.4254197 | INSIDE |          | 1.8971739 | 3.7248282 | 3283 |
| 1.99397   | 3.9833162 | INSIDE | 1087.37  | 1.5896778 | 3.0098212 | 4000 |
| 1.8341757 | 3.5656762 | INSIDE | 137.7524 | 2.0357084 | 4.1002401 | 3035 |

|           |           |        |          |           |           |  |      |
|-----------|-----------|--------|----------|-----------|-----------|--|------|
| 2.1247025 | 4.3611315 | INSIDE |          |           |           |  |      |
| 1.6833117 | 3.2116434 | INSIDE | 122.3459 | 1.2288347 | 2.343776  |  | 2726 |
| 1.9472564 | 3.8564045 | INSIDE | 167.0757 |           |           |  |      |
| 1.7991364 | 3.4801184 | INSIDE | 989.7813 | 1.5769707 | 2.9834275 |  | 1268 |
| 2.0443385 | 4.124841  | INSIDE |          | 1.1698233 | 2.2498414 |  | 2171 |
| 2.6057055 | 6.0868909 | INSIDE |          | 2.275995  | 4.8433156 |  | 3050 |
| 2.312522  | 4.967507  | INSIDE | 522.8445 | 1.2523144 | 2.3822328 |  | 1960 |
| 2.3097696 | 4.9580389 | INSIDE | 321.3324 | 1.4523383 | 2.7365122 |  | 988  |
| 2.395307  | 5.2608904 | INSIDE | 686.0703 | 1.7487049 | 3.3605675 |  | 1945 |
| 1.6002355 | 3.031928  | INSIDE |          | 1.4894505 | 2.8078201 |  | 3090 |
| 2.4086175 | 5.3096527 | INSIDE | 2538.338 | 2.1596107 | 4.4679428 |  | 3402 |
| 1.996546  | 3.9904349 | INSIDE |          | 1.6919134 | 3.2308492 |  | 3508 |
| 2.1270525 | 4.3682411 | INSIDE | 360.2401 | 1.977518  | 3.9381498 |  | 1037 |
| 2.4065337 | 5.3019891 | INSIDE | 134.1836 |           |           |  |      |
| 1.8299701 | 3.555297  | INSIDE | 163.4007 |           |           |  |      |
| 1.9193465 | 3.7825168 | INSIDE | 372.5968 | 1.8068008 | 3.4986559 |  | 2653 |
| 1.8376745 | 3.5743341 | INSIDE |          | 1.5934386 | 3.0176774 |  | 3401 |
| 2.075182  | 4.2139757 | INSIDE | 1615.608 |           |           |  |      |
| 1.5865732 | 3.0033512 | INSIDE | 180.6993 | 1.3875097 | 2.6162669 |  | 1765 |
| 2.0195374 | 4.0545376 | INSIDE | 116.6928 | 1.898653  | 3.728649  |  | 4235 |
| 2.2735865 | 4.8352366 | INSIDE | 213.2904 |           |           |  |      |
| 1.9220631 | 3.789646  | INSIDE | 925.6974 | 1.6754901 | 3.1942785 |  | 808  |
| 1.7485511 | 3.3602093 | INSIDE | 208.1477 | 1.7766995 | 3.4264141 |  | 3847 |
| 1.9248861 | 3.7970687 | INSIDE |          |           |           |  |      |
| 1.8815849 | 3.6847964 | INSIDE | 137.1379 | 1.6369416 | 3.1100582 |  | 2690 |
| 2.2751906 | 4.8406158 | INSIDE | 266.6216 | 1.6836716 | 3.2124447 |  | 3493 |
| 1.7831496 | 3.4417674 | INSIDE | 1298.333 | 1.559099  | 2.9466976 |  | 4047 |
| 2.0001132 | 4.0003139 | INSIDE | 673.2634 |           |           |  |      |
| 1.913106  | 3.7661906 | INSIDE | 856.8138 | 1.9503977 | 3.8648106 |  | 2116 |
| 1.8663026 | 3.6459698 | INSIDE |          | 1.272703  | 2.4161382 |  | 5293 |
| 2.419367  | 5.3493626 | INSIDE |          | 1.9282016 | 3.8058049 |  | 1426 |
| 1.7597686 | 3.386438  | INSIDE | 356.6268 | 1.4814088 | 2.7922126 |  | 4786 |
| 1.7520859 | 3.3684524 | INSIDE | 164.5673 | 1.2178769 | 2.3260416 |  | 2241 |
| 1.6268275 | 3.0883312 | INSIDE | 115.5213 |           |           |  |      |
| 2.1175985 | 4.3397096 | INSIDE | 227.4084 | 1.5808519 | 2.9914644 |  | 354  |
| 1.8557708 | 3.6194508 | INSIDE |          | 1.652964  | 3.1447907 |  | 1582 |
| 1.8154805 | 3.5197684 | INSIDE |          | 1.5664436 | 2.9617371 |  | 2395 |
| 1.7568927 | 3.3796942 | INSIDE |          | 1.4212985 | 2.6782646 |  | 4486 |
| 2.5472183 | 5.8450619 | INSIDE |          | 1.887868  | 3.7008791 |  | 2022 |
| 2.1675568 | 4.4926193 | INSIDE |          | 1.7004106 | 3.2499344 |  | 4046 |
| 2.3525832 | 5.1073793 | INSIDE |          | 1.5770718 | 2.9836365 |  | 5533 |
| 2.2729113 | 4.8329742 | INSIDE | 89.58789 |           |           |  |      |
| 2.0493279 | 4.139131  | INSIDE | 354.2428 | 1.8220576 | 3.5358513 |  | 2762 |
| 1.6808102 | 3.2060795 | INSIDE |          | 1.4375157 | 2.7085406 |  | 3382 |
| 1.8466557 | 3.5966548 | INSIDE |          | 1.6115555 | 3.0558114 |  | 5027 |
| 1.8604113 | 3.6311117 | INSIDE | 334.2851 | 1.1959115 | 2.2908953 |  | 5412 |
| 2.6723075 | 6.3744793 | INSIDE | 170.7828 | 2.275926  | 4.8430839 |  | 1203 |
| 1.7601693 | 3.3873787 | INSIDE |          |           |           |  |      |
| 2.0643737 | 4.1825237 | INSIDE | 116.3834 |           |           |  |      |
| 2.2762256 | 4.8440898 | INSIDE | 425.1991 | 1.7094482 | 3.2703572 |  | 3930 |
| 1.9635911 | 3.9003162 | INSIDE | 228.2093 |           |           |  |      |
| 2.361259  | 5.1381856 | INSIDE |          | 1.1893972 | 2.2805743 |  | 3706 |
| 1.5853251 | 3.0007541 | INSIDE | 246.756  | 1.5392513 | 2.9064363 |  | 4646 |
| 2.312454  | 4.9672729 | INSIDE | 486.3991 | 1.5116634 | 2.8513861 |  | 2248 |
| 2.19409   | 4.5760094 | INSIDE |          | 1.8288978 | 3.5526555 |  | 1650 |
| 2.0602734 | 4.1706533 | INSIDE | 98.5764  | 1.039364  | 2.0553214 |  | 5434 |
| 1.9320635 | 3.8160062 | INSIDE | 122.4207 | 2.0716922 | 4.2037947 |  | 2645 |
| 1.855742  | 3.6193785 | INSIDE | 590.951  | 1.5760627 | 2.9815503 |  | 1786 |

|           |           |        |          |           |           |      |
|-----------|-----------|--------|----------|-----------|-----------|------|
| 1.756259  | 3.37821   | INSIDE |          | 0.7551807 | 1.687843  | 5394 |
| 2.2857814 | 4.8762815 | INSIDE |          |           |           |      |
| 1.723679  | 3.3027757 | INSIDE |          | 1.6167272 | 3.0667854 | 4177 |
| 2.2600605 | 4.7901157 | INSIDE | 137.5227 | 2.0460634 | 4.1297756 | 3186 |
| 1.6048307 | 3.0416006 | INSIDE | 590.5848 | 1.0957377 | 2.1372234 | 5076 |
| 2.3871336 | 5.2311698 | INSIDE | 179.7549 | 1.9539769 | 3.8744107 | 821  |
| 2.321626  | 4.9989531 | INSIDE | 292.8547 | 2.1345112 | 4.3908833 | 2284 |
| 1.8489566 | 3.6023955 | INSIDE | 144.2812 |           |           |      |
| 1.6817813 | 3.2082383 | INSIDE | 429.9744 | 1.5846    | 2.9992463 | 3112 |
| 2.0112312 | 4.031261  | INSIDE | 1953.211 |           |           |      |
| 1.8873936 | 3.6996623 | INSIDE | 352.7046 | 1.4433213 | 2.7194621 | 1100 |
| 2.0253139 | 4.0708044 | INSIDE | 448.6834 |           |           |      |
| 1.6310496 | 3.0973826 | INSIDE |          |           |           |      |
| 1.8772151 | 3.6736523 | INSIDE | 228.2405 | 1.8131868 | 3.5141769 | 4096 |
| 2.7736628 | 6.8384189 | INSIDE | 125.1492 | 1.619181  | 3.0720059 | 4109 |
| 1.7707747 | 3.4123715 | INSIDE | 1218.738 | 1.2562594 | 2.3887558 | 4334 |
| 1.7968522 | 3.4746128 | INSIDE | 309.6927 | 1.8497016 | 3.6042563 | 1461 |
| 1.5953153 | 3.0216055 | INSIDE | 634.992  | 1.78912   | 3.4560402 | 799  |
| 2.330021  | 5.0281267 | INSIDE | 220.1097 | 1.8928859 | 3.7137737 | 942  |
| 1.7362642 | 3.3317132 | INSIDE | 178.8115 | 1.5290517 | 2.8859608 | 3139 |
| 2.014313  | 4.0398816 | INSIDE | 887.667  | 1.5935595 | 3.0179303 | 3071 |
| 2.6182303 | 6.1399644 | INSIDE | 524.5089 | 1.40661   | 2.6511347 | 1451 |
| 2.0690598 | 4.1961312 | INSIDE | 350.9181 | 1.4252605 | 2.6856299 | 5161 |
| 1.8561183 | 3.6203227 | INSIDE | 181.4362 | 1.4863123 | 2.8017191 | 364  |
| 1.9351227 | 3.8241065 | INSIDE | 281.1681 | 1.52791   | 2.8836778 | 3011 |
| 2.079189  | 4.2256961 | INSIDE | 1702.371 |           |           |      |
| 1.9984553 | 3.9957195 | INSIDE | 3073.53  | 1.6123867 | 3.0575725 | 1863 |
| 2.313054  | 4.9693391 | INSIDE | 751.634  |           |           |      |
| 2.1592495 | 4.4668243 | INSIDE | 151.7241 | 1.8593918 | 3.6285466 | 4876 |
| 1.624597  | 3.0835602 | INSIDE | 426.7791 | 2.6106544 | 6.1078067 | 119  |
| 1.7255902 | 3.3071539 | INSIDE | 427.3618 | 1.4788666 | 2.7872967 | 4411 |
| 2.3192012 | 4.9905582 | INSIDE | 698.7789 | 1.7065859 | 3.2638752 | 4090 |
| 2.2077198 | 4.6194459 | INSIDE | 267.9345 | 1.5662202 | 2.9612785 | 2243 |
| 2.2014606 | 4.5994476 | INSIDE | 1048.844 |           |           |      |
| 2.0870636 | 4.248824  | INSIDE | 200.5682 |           |           |      |
| 1.9557924 | 3.8792894 | INSIDE | 87.77781 | 1.8237631 | 3.5400337 | 2015 |
| 2.2913268 | 4.8950609 | INSIDE |          | 1.9796892 | 3.9440811 | 3155 |
| 1.8950827 | 3.719433  | INSIDE | 119.8658 | 1.8878593 | 3.7008568 | 4357 |
| 1.6258872 | 3.086319  | INSIDE |          | 1.957701  | 3.8844248 | 1422 |
| 1.7449539 | 3.3518414 | INSIDE |          | 1.5845355 | 2.9991122 | 3255 |
| 2.0915563 | 4.2620759 | INSIDE | 821.5455 | 1.1929921 | 2.2862642 | 3012 |
| 1.8685753 | 3.6517179 | INSIDE | 145.0843 | 1.4223944 | 2.6802998 | 3315 |
| 2.0866368 | 4.2475673 | INSIDE | 253.4713 | 1.2622458 | 2.3986885 | 1925 |
| 2.4748132 | 5.5589531 | INSIDE | 1121.487 | 1.3692898 | 2.5834336 | 1482 |
| 2.2927973 | 4.9000528 | INSIDE | 506.5373 | 1.8425673 | 3.5864768 | 3221 |
| 2.275268  | 4.8408755 | INSIDE | 153.3663 | 1.9633938 | 3.8997829 | 3422 |
| 1.8919418 | 3.7113442 | INSIDE | 130.3043 | 1.205113  | 2.3055533 | 4979 |
| 1.7896872 | 3.4573992 | INSIDE |          | 1.5352978 | 2.8984825 | 2382 |
| 2.403325  | 5.29021   | INSIDE | 257.8928 |           |           |      |
| 2.513761  | 5.7110697 | INSIDE | 100.2784 | 1.5934908 | 3.0177866 | 3080 |
| 2.3615937 | 5.1393778 | INSIDE | 611.9572 |           |           |      |
| 1.6505489 | 3.1395307 | INSIDE | 498.0313 | 1.0731599 | 2.1040367 | 4575 |
| 2.0787337 | 4.2243627 | INSIDE | 124.403  | 1.4599757 | 2.7510373 | 3892 |
| 2.0693433 | 4.1969559 | INSIDE | 317.8923 | 1.8972269 | 3.7249651 | 362  |
| 2.413048  | 5.3259837 | INSIDE | 332.1224 | 2.2215595 | 4.6639732 | 1452 |
| 1.8078666 | 3.5012416 | INSIDE | 772.2004 | 1.7110661 | 3.2740267 | 2172 |
| 2.1246352 | 4.3609281 | INSIDE | 984.1854 |           |           |      |
| 2.3114374 | 4.9637739 | INSIDE |          | 1.7058225 | 3.2621486 | 1917 |

|           |           |        |          |           |           |      |
|-----------|-----------|--------|----------|-----------|-----------|------|
| 1.9729857 | 3.9257973 | INSIDE |          | 1.775853  | 3.4244042 | 4809 |
| 2.7696226 | 6.819295  | INSIDE | 538.1694 | 1.9355413 | 3.8252162 | 688  |
| 1.793219  | 3.4658735 | INSIDE |          | 1.946271  | 3.8537714 | 2576 |
| 1.7522999 | 3.3689521 | INSIDE |          | 1.5574878 | 2.9434085 | 2575 |
| 1.9945344 | 3.9848748 | INSIDE | 111.9595 | 1.8198773 | 3.5305117 | 3272 |
| 2.2238905 | 4.671515  | INSIDE |          | 1.7785785 | 3.4308796 | 2824 |
| 1.9629992 | 3.8987164 | INSIDE | 710.4863 | 1.5055915 | 2.8394106 | 1797 |
| 2.2692015 | 4.8205625 | INSIDE | 372.821  | 1.8136741 | 3.515364  | 458  |
| 1.855169  | 3.6179413 | INSIDE |          | 1.9643917 | 3.9024812 | 477  |
| 1.7270516 | 3.3105057 | INSIDE | 897.6125 | 1.6812519 | 3.2070612 | 1862 |
| 1.7192972 | 3.2927596 | INSIDE |          | 1.3693938 | 2.5836198 | 3517 |
| 2.0917645 | 4.2626911 | INSIDE | 242.7957 | 1.7469596 | 3.3565046 | 4875 |
| 2.1259959 | 4.3650431 | INSIDE | 412.3169 | 2.1108928 | 4.3195853 | 1432 |
| 2.3109076 | 4.9619514 | INSIDE | 953.1483 | 1.9070201 | 3.7503366 | 228  |
| 2.5115843 | 5.7024595 | INSIDE | 671.7346 | 1.7445818 | 3.350977  | 1682 |
| 2.0229435 | 4.0641214 | INSIDE | 453.7735 |           |           |      |
| 1.9996864 | 3.9991306 | INSIDE | 152.9394 | 1.5560197 | 2.9404148 | 2981 |
| 1.8462116 | 3.5955478 | INSIDE | 3884.573 | 1.3944148 | 2.628819  | 3249 |
| 1.775669  | 3.4239675 | INSIDE | 268.7587 |           |           |      |
| 1.9734757 | 3.9271309 | INSIDE | 173.5255 | 1.774442  | 3.4210567 | 4035 |
| 2.1466377 | 4.4279462 | INSIDE | 1914.529 | 1.8133681 | 3.5146185 | 2773 |
| 1.9707884 | 3.9198227 | INSIDE | 810.0961 | 1.4243567 | 2.683948  | 2631 |
| 2.319844  | 4.9927823 | INSIDE | 174.2363 | 2.0287194 | 4.0804249 | 4426 |
| 2.099558  | 4.2857806 | INSIDE | 696.9088 | 1.1708077 | 2.2513771 | 5366 |
| 2.1377718 | 4.4008183 | INSIDE | 530.2264 | 1.9137172 | 3.7677865 | 2574 |
| 1.7243751 | 3.3043697 | INSIDE | 134.1698 | 1.5058857 | 2.8399897 | 3890 |
| 1.9353436 | 3.8246921 | INSIDE | 239.4312 |           |           |      |
| 1.7095419 | 3.2705696 | INSIDE | 1705.836 | 2.329191  | 5.0252348 | 202  |
| 2.4270988 | 5.3781083 | INSIDE |          | 2.1177568 | 4.3401858 | 4534 |
| 1.754856  | 3.3749263 | INSIDE | 284.9873 | 1.5387979 | 2.9055231 | 2608 |
| 2.1831872 | 4.5415577 | INSIDE | 109.3291 | 2.1683717 | 4.4951576 | 4482 |
| 1.7815324 | 3.4379115 | INSIDE | 195.7838 | 1.6965096 | 3.2411586 | 3492 |
| 1.9692034 | 3.9155186 | INSIDE | 2267.305 | 1.4310817 | 2.6964882 | 4362 |
| 2.172598  | 4.5083452 | INSIDE |          | 2.1737745 | 4.5120232 | 594  |
| 1.829099  | 3.553151  | INSIDE |          | 1.7154775 | 3.2840532 | 1307 |
| 1.9689207 | 3.9147514 | INSIDE |          | 1.002778  | 2.0038548 | 4143 |
| 1.647986  | 3.1339583 | INSIDE | 1028.351 | 1.345088  | 2.5404569 | 3297 |
| 2.2702718 | 4.8241401 | INSIDE | 1102.973 | 1.819201  | 3.5288571 | 501  |
| 2.166612  | 4.4896781 | INSIDE | 313.0247 |           |           |      |
| 2.0837104 | 4.2389601 | INSIDE | 568.1115 | 1.9638249 | 3.9009484 | 3660 |
| 2.6059885 | 6.088085  | INSIDE | 134.698  | 2.0884848 | 4.2530116 | 1225 |
| 2.2094665 | 4.6250421 | INSIDE | 533.0004 | 1.910868  | 3.7603527 | 1957 |
| 2.177014  | 4.5221662 | INSIDE |          | 1.3206226 | 2.4977388 | 3743 |
| 1.7403716 | 3.3412122 | INSIDE | 137.459  | 1.9294814 | 3.8091825 | 2141 |
| 1.8389614 | 3.5775239 | INSIDE |          | 1.9234307 | 3.7932401 | 416  |
| 1.7529517 | 3.3704745 | INSIDE | 303.1516 | 1.6690872 | 3.1801332 | 4448 |
| 1.9671695 | 3.9100024 | INSIDE | 167.1114 | 1.8255439 | 3.5444061 | 545  |
| 2.0818942 | 4.2336271 | INSIDE | 704.7319 | 1.9490497 | 3.8612011 | 1702 |
| 1.8443215 | 3.5908403 | INSIDE |          | 1.6832643 | 3.2115379 | 1918 |
| 1.971188  | 3.9209086 | INSIDE | 1899.157 | 1.7722957 | 3.4159709 | 230  |
| 2.605867  | 6.0875723 | INSIDE | 281.5916 | 1.7077205 | 3.2664431 | 3514 |
| 1.9711925 | 3.9209208 | INSIDE |          | 1.7352804 | 3.329442  | 3820 |
| 2.090258  | 4.2582422 | INSIDE |          | 1.8851051 | 3.6937983 | 1327 |
| 1.7071413 | 3.265132  | INSIDE |          | 1.8953542 | 3.720133  | 518  |
| 1.7493299 | 3.3620237 | INSIDE |          |           |           |      |
| 1.6361163 | 3.1082796 | INSIDE | 135.2052 | 1.7105472 | 3.2728494 | 4059 |
| 1.8769255 | 3.672915  | INSIDE |          |           |           |      |
| 2.353962  | 5.1122628 | INSIDE | 809.244  | 1.8771365 | 3.6734522 | 1045 |



|           |           |        |          |           |           |      |
|-----------|-----------|--------|----------|-----------|-----------|------|
| 1.8529803 | 3.6124567 | INSIDE | 645.7996 | 1.9836469 | 3.9549156 | 468  |
| 2.1189134 | 4.3436667 | INSIDE |          | 1.8125021 | 3.5125094 | 1752 |
| 2.4260206 | 5.3740904 | INSIDE |          |           |           |      |
| 2.047198  | 4.1330247 | INSIDE | 108.7765 | 2.0800307 | 4.2281621 | 3535 |
| 1.7595209 | 3.3858567 | INSIDE | 508.0292 | 1.4952531 | 2.819136  | 4714 |
| 1.8054483 | 3.4953776 | INSIDE | 845.2052 | 1.4339143 | 2.7017877 | 4199 |
| 2.030757  | 4.086192  | INSIDE | 546.563  | 1.5726324 | 2.9744695 | 831  |
| 2.6015406 | 6.069344  | INSIDE | 315.4379 | 1.7111024 | 3.2741091 | 5082 |
| 1.9694049 | 3.9160655 | INSIDE | 2710.293 | 1.4312464 | 2.696796  | 2197 |
| 2.4429524 | 5.4375336 | INSIDE | 714.9833 | 1.4556664 | 2.7428323 | 4327 |
| 1.5880047 | 3.0063328 | INSIDE | 849.5323 | 1.6603222 | 3.1608711 | 1508 |
| 1.919589  | 3.7831527 | INSIDE | 202.0478 | 2.3656833 | 5.153967  | 912  |
| 1.9120477 | 3.7634289 | INSIDE | 132.5961 |           |           |      |
| 2.0399811 | 4.1124014 | INSIDE |          | 1.4185963 | 2.6732528 | 2082 |
| 2.2184436 | 4.6539109 | INSIDE |          |           |           |      |
| 2.0146365 | 4.0407875 | INSIDE | 350.2027 | 2.275137  | 4.840436  | 2406 |
| 2.1568284 | 4.4593344 | INSIDE | 239.783  | 1.52351   | 2.8748965 | 4384 |
| 1.6562274 | 3.1519123 | INSIDE |          | 1.6468445 | 3.1314796 | 1881 |
| 1.603197  | 3.0381582 | INSIDE | 919.7102 |           |           |      |
| 1.9766794 | 3.9358614 | INSIDE | 1081.089 |           |           |      |
| 2.0410833 | 4.1155445 | INSIDE | 876.5305 | 1.7053815 | 3.2611516 | 2084 |
| 1.784102  | 3.4440402 | INSIDE | 269.3589 | 1.8340709 | 3.5654172 | 3152 |
| 1.6336199 | 3.1029058 | INSIDE | 1106.769 | 1.5464475 | 2.9209699 | 3059 |
| 2.187329  | 4.5546147 | INSIDE |          | 1.5390711 | 2.9060733 | 2890 |
| 1.9516094 | 3.8680579 | INSIDE |          |           |           |      |
| 2.3373132 | 5.053606  | INSIDE |          |           |           |      |
| 2.0164733 | 4.0459354 | INSIDE | 138.0004 | 1.7971983 | 3.4754464 | 2895 |
| 1.802075  | 3.4872142 | INSIDE | 188.1277 | 1.5439854 | 2.9159892 | 4902 |
| 2.3811977 | 5.2096906 | INSIDE |          | 1.8768466 | 3.6727141 | 3749 |
| 2.0927317 | 4.2655498 | INSIDE | 1070.529 | 2.0047867 | 4.0132936 | 440  |
| 2.085344  | 4.2437627 | INSIDE | 170.7072 | 1.6367078 | 3.1095543 | 466  |
| 2.1443822 | 4.421029  | INSIDE |          | 2.1710846 | 4.5036184 | 1966 |
| 1.8699318 | 3.655153  | INSIDE | 922.7813 | 2.2153616 | 4.6439795 | 931  |
| 1.963769  | 3.9007972 | INSIDE | 91.74957 |           |           |      |
| 2.0304203 | 4.0852385 | INSIDE | 589.6002 | 1.8925009 | 3.7127828 | 886  |
| 1.920871  | 3.7865159 | INSIDE | 264.948  | 1.4740599 | 2.7780256 | 2347 |
| 1.6639613 | 3.1688542 | INSIDE | 96.30839 | 1.1987331 | 2.2953801 | 3676 |
| 1.5915673 | 3.0137658 | INSIDE |          | 1.2005157 | 2.2982181 | 4818 |
| 1.7964525 | 3.4736502 | INSIDE | 1344.444 | 2.2370574 | 4.7143452 | 370  |
| 1.646154  | 3.1299812 | INSIDE | 1872.436 | 1.4701147 | 2.7704392 | 1538 |
| 1.9400274 | 3.8371294 | INSIDE |          |           |           |      |
| 1.8238488 | 3.540244  | INSIDE | 92.9524  | 1.8791388 | 3.6785541 | 410  |
| 1.801811  | 3.4865762 | INSIDE |          |           |           |      |
| 2.497847  | 5.6484186 | INSIDE | 593.3823 | 2.3208907 | 4.996406  | 958  |
| 1.6434784 | 3.1241818 | INSIDE | 513.3182 | 1.5243001 | 2.8764713 | 4657 |
| 2.4266138 | 5.3763006 | INSIDE |          |           |           |      |
| 1.7896117 | 3.4572183 | INSIDE | 625.8681 |           |           |      |
| 1.7693594 | 3.4090255 | INSIDE |          | 1.4609227 | 2.7528437 | 2725 |
| 2.132533  | 4.3848667 | INSIDE | 244.3794 | 1.9874027 | 3.9652249 | 3158 |
| 2.0640752 | 4.1816584 | INSIDE |          |           |           |      |
| 1.9957125 | 3.9881302 | INSIDE |          | 2.0218961 | 4.0611719 | 903  |
| 1.8105083 | 3.5076585 | INSIDE |          | 1.22966   | 2.3451172 | 5431 |
| 2.10709   | 4.3082143 | INSIDE | 109.7342 |           |           |      |
| 1.7929456 | 3.4652168 | INSIDE | 248.4437 | 1.4816307 | 2.7926421 | 4447 |
| 1.7096212 | 3.2707493 | INSIDE | 254.5819 | 1.5568374 | 2.9420819 | 5428 |
| 1.8928227 | 3.713611  | INSIDE | 501.3337 | 1.5145831 | 2.8571625 | 4616 |
| 1.9561428 | 3.8802317 | INSIDE | 1844.117 | 2.7945657 | 6.9382205 | 47   |
| 2.0380347 | 4.106857  | INSIDE | 389.6653 | 1.8666806 | 3.6469252 | 2677 |

|           |           |        |          |           |           |      |
|-----------|-----------|--------|----------|-----------|-----------|------|
| 1.9437028 | 3.8469173 | INSIDE |          | 1.8673528 | 3.6486248 | 1002 |
| 2.0786853 | 4.224221  | INSIDE | 151.2737 | 2.2210913 | 4.6624598 | 1775 |
| 2.1156032 | 4.3337118 | INSIDE | 265.7844 | 2.0625424 | 4.1772179 | 2863 |
| 1.9361131 | 3.8267326 | INSIDE | 319.3314 |           |           |      |
| 1.9317839 | 3.8152667 | INSIDE |          |           |           |      |
| 2.9349272 | 7.6471766 | INSIDE | 128.625  | 1.8461223 | 3.5953253 | 2924 |
| 1.7925761 | 3.4643294 | INSIDE | 440.941  |           |           |      |
| 1.6976976 | 3.2438286 | INSIDE | 131.7698 | 1.9270002 | 3.8026369 | 1033 |
| 1.7382988 | 3.3364151 | INSIDE |          |           |           |      |
| 2.0700157 | 4.1989124 | INSIDE | 201.2715 | 1.8861542 | 3.6964854 | 5479 |
| 1.6430012 | 3.1231486 | INSIDE |          |           |           |      |
| 2.0017328 | 4.0048072 | INSIDE | 251.1968 | 1.8676354 | 3.6493396 | 1258 |
| 2.3177118 | 4.9854088 | INSIDE | 246.5106 | 1.5878572 | 3.0060254 | 2206 |
| 2.0496948 | 4.1401838 | INSIDE |          |           |           |      |
| 1.6270201 | 3.0887436 | INSIDE |          |           |           |      |
| 1.8461536 | 3.5954033 | INSIDE | 1579.056 |           |           |      |
| 2.2321079 | 4.6981993 | INSIDE | 202.846  | 1.8689973 | 3.6527862 | 3209 |
| 2.1041815 | 4.2995376 | INSIDE |          | 1.6721599 | 3.1869136 | 1888 |
| 2.4051867 | 5.2970411 | INSIDE | 2182.495 | 2.2723167 | 4.8309827 | 1880 |
| 1.7300243 | 3.3173341 | INSIDE | 146.7515 |           |           |      |
| 2.0635645 | 4.1801784 | INSIDE |          |           |           |      |
| 2.0463073 | 4.1304739 | INSIDE | 432.2488 | 1.632107  | 3.0996536 | 717  |
| 1.9269001 | 3.8023731 | INSIDE | 108.53   | 1.6302922 | 3.0957569 | 3926 |
| 2.0424292 | 4.1193857 | INSIDE | 157.5613 | 1.449067  | 2.7303142 | 2384 |
| 2.163593  | 4.4802927 | INSIDE |          | 1.466387  | 2.76329   | 1803 |
| 1.5895855 | 3.0096287 | INSIDE | 316.3534 |           |           |      |
| 2.4315767 | 5.394827  | INSIDE | 216.7661 | 2.008631  | 4.0240019 | 556  |
| 1.9129722 | 3.7658413 | INSIDE | 132.8163 | 1.6699535 | 3.1820434 | 1738 |
| 2.4367986 | 5.4143892 | INSIDE | 106.6014 | 2.1787164 | 4.5275055 | 2921 |
| 2.026832  | 4.0750902 | INSIDE |          | 2.5821202 | 5.9881908 | 1837 |
| 2.28231   | 4.8645623 | INSIDE | 89.6886  | 2.0371103 | 4.1042264 | 5365 |
| 2.0935056 | 4.2678385 | INSIDE | 672.2916 | 2.1741152 | 4.5130889 | 190  |
| 2.0802135 | 4.2286979 | INSIDE | 166.3677 | 1.5082895 | 2.8447256 | 5030 |
| 2.48238   | 5.5881858 | INSIDE | 1101.971 | 1.8059994 | 3.496713  | 4418 |
| 1.7318876 | 3.3216213 | INSIDE | 449.7423 |           |           |      |
| 1.9145131 | 3.7698656 | INSIDE | 120.1537 | 1.6076499 | 3.04755   | 786  |
| 1.8855221 | 3.6948661 | INSIDE | 427.392  | 1.4809058 | 2.7912393 | 4379 |
| 1.8345104 | 3.5665035 | INSIDE | 833.4244 | 1.4547596 | 2.7411088 | 2264 |
| 1.9965996 | 3.9905832 | INSIDE | 320.7737 | 1.8217412 | 3.5350759 | 4136 |
| 1.7492821 | 3.3619123 | INSIDE | 133.3608 |           |           |      |
| 2.2334867 | 4.7026915 | INSIDE | 523.8973 | 1.8966153 | 3.7233863 | 1412 |
| 1.8636819 | 3.6393528 | INSIDE | 1641.259 |           |           |      |
| 2.36663   | 5.1573502 | INSIDE | 163.2175 | 2.949139  | 7.7228802 | 409  |
| 1.8821642 | 3.6862763 | INSIDE | 339.8318 | 1.9555844 | 3.8787301 | 1137 |
| 1.9646761 | 3.9032506 | INSIDE | 1042.694 | 2.0877585 | 4.2508711 | 2705 |
| 2.3164043 | 4.9808926 | INSIDE | 180.9545 | 2.1255982 | 4.36384   | 729  |
| 1.6789018 | 3.2018413 | INSIDE | 72.96561 |           |           |      |
| 2.2593906 | 4.787892  | INSIDE | 521.6797 | 2.124137  | 4.3594224 | 434  |
| 2.203195  | 4.6049803 | INSIDE | 530.5475 | 1.5763401 | 2.9821237 | 5541 |
| 2.6494641 | 6.2743417 | INSIDE | 1026.387 | 1.610052  | 3.0526284 | 3957 |
| 2.2051146 | 4.6111117 | INSIDE | 5801.294 | 2.8350768 | 7.135808  | 34   |
| 2.0999322 | 4.2868924 | INSIDE | 647.6238 | 1.1926494 | 2.2857211 | 2170 |
| 1.9437406 | 3.8470181 | INSIDE |          |           |           |      |
| 1.7661009 | 3.4013345 | INSIDE | 122.5008 | 1.4856195 | 2.800374  | 2673 |
| 1.8107806 | 3.5083206 | INSIDE |          |           |           |      |
| 2.0045834 | 4.0127281 | INSIDE | 177.7128 |           |           |      |
| 1.8389535 | 3.5775043 | INSIDE | 469.6433 | 1.6364566 | 3.1090129 | 5066 |
| 1.9677266 | 3.9115126 | INSIDE | 1171.48  | 1.6775239 | 3.1987847 | 3111 |

|           |           |        |          |           |           |      |
|-----------|-----------|--------|----------|-----------|-----------|------|
| 1.9541906 | 3.8749847 | INSIDE | 849.8795 | 1.981356  | 3.9486404 | 929  |
| 1.943458  | 3.8462646 | INSIDE |          | 1.5694697 | 2.967956  | 3950 |
| 1.6370971 | 3.1103935 | INSIDE |          |           |           |      |
| 2.129322  | 4.3751182 | INSIDE | 216.5735 |           |           |      |
| 1.7868042 | 3.4504971 | INSIDE | 1702.729 | 1.6095461 | 3.0515582 | 2250 |
| 1.8600068 | 3.6300937 | INSIDE | 280.7838 |           |           |      |
| 2.1951337 | 4.579321  | INSIDE |          |           |           |      |
| 1.6975542 | 3.2435062 | INSIDE |          | 1.4225311 | 2.6805538 | 4966 |
| 2.0890443 | 4.2546613 | INSIDE | 129.2019 |           |           |      |
| 1.9324945 | 3.8171463 | INSIDE | 115.1044 | 1.2915078 | 2.4478375 | 1641 |
| 2.0423288 | 4.119099  | INSIDE | 308.3125 | 1.6590798 | 3.1581502 | 1706 |
| 2.1031344 | 4.2964181 | INSIDE | 294.1147 | 1.3348218 | 2.5224432 | 1949 |
| 1.7000157 | 3.2490449 | INSIDE | 126.8178 | 1.8135204 | 3.5149895 | 1403 |
| 2.0127628 | 4.035543  | INSIDE | 313.6469 |           |           |      |
| 1.8336381 | 3.5643478 | INSIDE | 1334.592 | 1.5156844 | 2.8593444 | 3608 |
| 1.7270269 | 3.310449  | INSIDE | 394.4825 | 1.7446089 | 3.35104   | 1708 |
| 2.4852338 | 5.5992508 | INSIDE | 140.4409 | 1.8361748 | 3.5706205 | 2759 |
| 1.8116906 | 3.5105342 | INSIDE | 634.712  | 1.8828558 | 3.6880438 | 467  |
| 1.8836918 | 3.6901816 | INSIDE | 134.424  | 1.5157831 | 2.85954   | 4544 |
| 2.1214688 | 4.3513673 | INSIDE | 142.6    | 1.7559311 | 3.3774422 | 4971 |
| 1.7426351 | 3.3464584 | INSIDE | 420.7022 | 2.0343583 | 4.0964048 | 943  |
| 1.9844706 | 3.9571743 | INSIDE | 1559.659 | 1.5059361 | 2.8400889 | 1923 |
| 2.0288324 | 4.0807445 | INSIDE | 252.2615 | 1.7801259 | 3.4345615 | 686  |
| 1.6686163 | 3.1790954 | INSIDE | 122.6766 |           |           |      |
| 2.598547  | 6.0567632 | INSIDE | 99.23986 |           |           |      |
| 2.5667694 | 5.9248121 | INSIDE | 882.9536 | 1.6771542 | 3.1979651 | 1070 |
| 2.1570058 | 4.4598828 | INSIDE | 126.6702 | 2.0459392 | 4.1294201 | 3333 |
| 1.7614095 | 3.3902919 | INSIDE |          |           |           |      |
| 1.9928565 | 3.980243  | INSIDE | 1038.704 | 1.8782295 | 3.6762363 | 570  |
| 2.018959  | 4.0529124 | INSIDE | 137.6398 | 1.7630517 | 3.3941532 | 2209 |
| 2.0472584 | 4.1331978 | INSIDE | 213.812  | 1.8219892 | 3.5356837 | 2187 |
| 1.9297074 | 3.8097792 | INSIDE |          |           |           |      |
| 1.6938182 | 3.2351177 | INSIDE | 166.5043 | 1.3850296 | 2.6117732 | 1089 |
| 2.3378944 | 5.0556423 | INSIDE |          | 1.9970537 | 3.9918395 | 1224 |
| 2.6962674 | 6.481229  | INSIDE |          |           |           |      |
| 2.4470837 | 5.4531268 | INSIDE | 165.8475 | 1.2431905 | 2.3672146 | 5419 |
| 2.144611  | 4.4217302 | INSIDE | 163.1822 | 1.284784  | 2.4364557 | 1363 |
| 2.0716004 | 4.2035272 | INSIDE | 193.558  | 1.598693  | 3.0286881 | 4506 |
| 2.1888225 | 4.5593321 | INSIDE | 631.7067 | 2.031728  | 4.0889431 | 1445 |
| 1.916825  | 3.7759116 | INSIDE | 311.7538 | 1.5051321 | 2.8385066 | 3984 |
| 2.1820972 | 4.5381277 | INSIDE | 183.2377 | 1.6377472 | 3.1117954 | 3604 |
| 1.7991638 | 3.4801845 | INSIDE | 160.16   |           |           |      |
| 1.7418494 | 3.3446364 | INSIDE | 425.2766 | 1.4483474 | 2.7289527 | 1014 |
| 2.0506787 | 4.1430083 | INSIDE | 3187.19  | 1.8431966 | 3.5880416 | 1623 |
| 1.8557836 | 3.6194829 | INSIDE |          |           |           |      |
| 1.621837  | 3.0776667 | INSIDE | 730.173  | 1.4161065 | 2.6686433 | 5491 |
| 2.040921  | 4.1150815 | INSIDE | 157.9292 | 2.4660068 | 5.5251238 | 350  |
| 1.9255584 | 3.7988386 | INSIDE | 170.7125 | 1.2867529 | 2.4397831 | 532  |
| 1.9369748 | 3.8290189 | INSIDE | 115.9249 | 1.5692294 | 2.9674617 | 5559 |
| 2.184553  | 4.5458592 | INSIDE | 1457.091 | 2.0348554 | 4.0978166 | 1177 |
| 2.1157017 | 4.3340077 | INSIDE | 430.8128 | 1.557821  | 2.9440884 | 3797 |
| 1.8796141 | 3.6797662 | INSIDE | 177.6919 | 1.9171991 | 3.7768909 | 930  |
| 1.6927829 | 3.232797  | INSIDE | 377.3344 | 1.248184  | 2.3754223 | 1700 |
| 2.2440717 | 4.7373219 | INSIDE | 198.6775 |           |           |      |
| 2.0476048 | 4.1341903 | INSIDE |          |           |           |      |
| 2.0444155 | 4.1250611 | INSIDE | 239.8456 | 1.6645288 | 3.170101  | 3922 |
| 1.9020855 | 3.7375309 | INSIDE | 816.0733 |           |           |      |
| 2.125915  | 4.3647983 | INSIDE | 215.3763 | 1.8487644 | 3.6019157 | 155  |

|           |           |        |          |           |           |      |
|-----------|-----------|--------|----------|-----------|-----------|------|
| 2.2006595 | 4.5968943 | INSIDE | 205.6377 | 2.5424898 | 5.8259358 | 581  |
| 1.9837654 | 3.9552404 | INSIDE | 404.0708 | 1.4284604 | 2.6915932 | 4519 |
| 1.7855414 | 3.4474781 | INSIDE | 178.0654 | 1.5675503 | 2.96401   | 3995 |
| 1.9047589 | 3.7444632 | INSIDE | 343.9895 |           |           |      |
| 2.1736221 | 4.5115466 | INSIDE |          | 1.5467231 | 2.921528  | 3474 |
| 2.2468474 | 4.7464451 | INSIDE |          | 2.262083  | 4.7968356 | 386  |
| 2.058979  | 4.1669131 | INSIDE | 699.622  | 1.5515032 | 2.931224  | 4731 |
| 1.6005138 | 3.0325129 | INSIDE | 157.758  |           |           |      |
| 2.2249005 | 4.6747866 | INSIDE |          | 1.3051094 | 2.4710246 | 5015 |
| 1.7924078 | 3.4639253 | INSIDE |          | 1.6685596 | 3.1789704 | 372  |
| 1.750836  | 3.3655353 | INSIDE | 132.0649 | 1.4422477 | 2.7174391 | 4949 |
| 2.0078647 | 4.0218651 | INSIDE |          | 1.6098323 | 3.0521636 | 3344 |
| 1.9568017 | 3.8820043 | INSIDE |          | 1.1276592 | 2.1850393 | 2421 |
| 1.7692376 | 3.4087377 | INSIDE | 159.9742 | 1.8317951 | 3.5597973 | 2942 |
| 2.1859767 | 4.5503474 | INSIDE |          | 2.1384828 | 4.4029877 | 3122 |
| 2.2691967 | 4.8205465 | INSIDE | 1104.484 | 1.9830487 | 3.9532761 | 4029 |
| 1.8226902 | 3.537402  | INSIDE | 286.0979 |           |           |      |
| 2.6350179 | 6.2118281 | INSIDE | 285.8499 | 2.1675355 | 4.4925529 | 1490 |
| 2.7096903 | 6.541812  | INSIDE |          | 1.5916699 | 3.0139801 | 4658 |
| 2.0544674 | 4.1539026 | INSIDE | 570.6758 |           |           |      |
| 1.9503527 | 3.86469   | INSIDE | 319.8612 | 1.9125135 | 3.7646441 | 4304 |
| 1.996883  | 3.9913672 | INSIDE |          | 1.8716213 | 3.659436  | 4577 |
| 2.502724  | 5.6675452 | INSIDE | 811.5657 |           |           |      |
| 1.9451909 | 3.8508873 | INSIDE | 135.1519 | 1.5171093 | 2.8621699 | 2734 |
| 1.8241267 | 3.540926  | INSIDE |          | 1.3290266 | 2.5123311 | 2368 |
| 2.2236059 | 4.6705935 | INSIDE | 880.9376 | 1.503043  | 2.8343993 | 5266 |
| 1.9451094 | 3.8506698 | INSIDE |          | 1.8686144 | 3.6518168 | 2898 |
| 2.4721036 | 5.5485223 | INSIDE | 160.5029 | 2.2943444 | 4.9053103 | 1021 |
| 1.8993872 | 3.730547  | INSIDE |          | 1.4455262 | 2.7236214 | 5561 |
| 1.9558511 | 3.8794472 | INSIDE |          |           |           |      |
| 2.0651155 | 4.1846748 | INSIDE | 304.8998 | 1.6310538 | 3.0973916 | 5385 |
| 1.7261709 | 3.3084854 | INSIDE |          | 1.2623218 | 2.3988148 | 4696 |
| 2.4766665 | 5.5660987 | INSIDE | 404.722  |           |           |      |
| 1.6497308 | 3.1377508 | INSIDE |          | 1.5862234 | 3.0026231 | 3907 |
| 1.8926004 | 3.7130388 | INSIDE | 824.9734 |           |           |      |
| 2.4376776 | 5.4176891 | INSIDE |          | 1.986409  | 3.9624947 | 4625 |
| 1.6452191 | 3.1279536 | INSIDE | 170.1908 | 1.2080305 | 2.3102204 | 4961 |
| 1.7368989 | 3.3331792 | INSIDE | 1071.002 | 1.9427717 | 3.8444353 | 613  |
| 1.917413  | 3.7774509 | INSIDE | 620.001  |           |           |      |
| 1.7314563 | 3.3206284 | INSIDE | 1192.086 | 1.6554141 | 3.150136  | 2453 |
| 2.0777738 | 4.2215529 | INSIDE | 109.197  | 2.0978045 | 4.2805747 | 1874 |
| 2.1160738 | 4.3351256 | INSIDE |          |           |           |      |
| 2.7892678 | 6.9127886 | INSIDE | 163.3249 | 2.2053077 | 4.6117289 | 3636 |
| 2.152623  | 4.4463546 | INSIDE |          | 1.4017422 | 2.6422046 | 3369 |
| 2.2872798 | 4.8813487 | INSIDE |          |           |           |      |
| 1.9386001 | 3.833335  | INSIDE | 185.6706 | 1.7345693 | 3.3278013 | 2851 |
| 1.6899639 | 3.2264863 | INSIDE |          | 1.501711  | 2.8317836 | 5123 |
| 2.169504  | 4.498687  | INSIDE | 162.7463 | 1.8390095 | 3.5776432 | 564  |
| 1.7469532 | 3.3564897 | INSIDE | 131.7764 |           |           |      |
| 2.0048852 | 4.0135676 | INSIDE | 397.519  | 2.0630946 | 4.1788171 | 77   |
| 2.0827923 | 4.2362634 | INSIDE | 279.9139 | 1.9021907 | 3.7378034 | 3211 |
| 2.1700008 | 4.5002364 | INSIDE |          | 1.8753451 | 3.6688937 | 292  |
| 1.81991   | 3.5305917 | INSIDE | 200.0945 | 1.8695437 | 3.6541699 | 567  |
| 1.7254235 | 3.3067718 | INSIDE | 2338.896 | 1.2745055 | 2.4191588 | 3965 |
| 1.7484919 | 3.3600714 | INSIDE | 126.909  | 1.3557005 | 2.5592135 | 3072 |
| 1.7289363 | 3.3148333 | INSIDE | 724.9931 | 1.9607524 | 3.8926494 | 1883 |
| 1.7795815 | 3.4332657 | INSIDE | 366.8518 |           |           |      |
| 2.459345  | 5.4996698 | INSIDE | 3530.636 | 1.6283473 | 3.0915863 | 3313 |

|           |           |        |          |           |           |      |  |
|-----------|-----------|--------|----------|-----------|-----------|------|--|
| 1.6715294 | 3.1855211 | INSIDE |          |           |           |      |  |
| 2.3685853 | 5.1643447 | INSIDE | 250.6891 |           |           |      |  |
| 2.1814551 | 4.5361083 | INSIDE | 306.5155 | 1.7641996 | 3.3968549 | 1810 |  |
| 2.1434946 | 4.4183099 | INSIDE | 1696.269 | 1.8844357 | 3.6920848 | 1487 |  |
| 2.3888493 | 5.2373946 | INSIDE | 2286.926 | 1.5654427 | 2.9596831 | 4331 |  |
| 1.6657287 | 3.1727387 | INSIDE | 224.6138 | 1.9793037 | 3.9430273 | 1162 |  |
| 2.074529  | 4.2120688 | INSIDE |          |           |           |      |  |
| 2.0052857 | 4.014682  | INSIDE | 642.7053 | 1.8499566 | 3.6048934 | 2855 |  |
| 2.118308  | 4.3418443 | INSIDE | 116.8472 |           |           |      |  |
| 2.1134162 | 4.3271472 | INSIDE | 774.3745 | 1.8262991 | 3.5462619 | 1337 |  |
| 1.9765861 | 3.9356068 | INSIDE |          | 2.0676365 | 4.1919936 | 1596 |  |
| 1.9062078 | 3.7482256 | INSIDE | 143.6119 | 1.5208431 | 2.869587  | 3495 |  |
| 1.8888371 | 3.7033659 | INSIDE | 420.504  |           |           |      |  |
| 1.9688485 | 3.9145555 | INSIDE | 184.8575 | 1.8083439 | 3.5024001 | 2747 |  |
| 1.8710374 | 3.6579552 | INSIDE | 916.7803 |           |           |      |  |
| 2.181299  | 4.5356176 | INSIDE | 679.3833 | 1.5364108 | 2.9007195 | 2051 |  |
| 1.7290767 | 3.3151559 | INSIDE | 155.2352 | 0.9601837 | 1.9455577 | 2507 |  |
| 2.3224711 | 5.0018823 | INSIDE |          |           |           |      |  |
| 2.1817136 | 4.5369212 | INSIDE |          | 1.7953155 | 3.4709137 | 2185 |  |
| 2.0386531 | 4.1086177 | INSIDE | 666.9847 | 1.6393632 | 3.1152829 | 1230 |  |
| 2.0835292 | 4.2384278 | INSIDE | 3890.915 |           |           |      |  |
| 2.1060836 | 4.30521   | INSIDE | 114.1183 | 1.8798212 | 3.6802945 | 4121 |  |
| 1.8713495 | 3.6587466 | INSIDE |          |           |           |      |  |
| 1.8876746 | 3.700383  | INSIDE | 463.6688 | 1.4179753 | 2.6721024 | 1400 |  |
| 1.7829933 | 3.4413945 | INSIDE | 412.0452 | 1.6342092 | 3.1041735 | 3518 |  |
| 1.7392744 | 3.3386721 | INSIDE | 105.1461 | 1.7692686 | 3.408811  | 2478 |  |
| 2.2002351 | 4.5955422 | INSIDE | 134.8445 | 1.4020997 | 2.6428594 | 5305 |  |
| 1.7522521 | 3.3688404 | INSIDE | 2043.56  | 1.8585567 | 3.6264468 | 894  |  |
| 1.7614585 | 3.3904071 | INSIDE | 1497.087 | 1.3738256 | 2.5915686 | 2521 |  |
| 1.9659916 | 3.9068114 | INSIDE | 212.3592 |           |           |      |  |
| 2.2567768 | 4.7792254 | INSIDE | 175.9845 | 1.3222643 | 2.5005827 | 2809 |  |
| 1.9350682 | 3.823962  | INSIDE | 216.1857 | 2.0724263 | 4.2059343 | 772  |  |
| 1.7575903 | 3.3813288 | INSIDE |          | 1.5248013 | 2.8774708 | 4718 |  |
| 2.1558495 | 4.4563097 | INSIDE | 393.4411 | 1.5854125 | 3.0009359 | 2704 |  |
| 2.032667  | 4.0916054 | INSIDE | 307.9813 |           |           |      |  |
| 2.3185818 | 4.9884161 | INSIDE | 464.9849 | 1.3006876 | 2.4634627 | 1606 |  |
| 1.6821997 | 3.2091689 | INSIDE | 650.0333 | 1.4109831 | 2.6591831 | 4437 |  |
| 1.892103  | 3.7117589 | INSIDE |          | 1.74401   | 3.3496492 | 1718 |  |
| 2.337626  | 5.0547019 | INSIDE | 1572.531 | 1.8347672 | 3.5671384 | 1025 |  |
| 2.1129313 | 4.3256931 | INSIDE | 103.7855 | 1.8525273 | 3.6113226 | 4284 |  |
| 2.2721496 | 4.8304232 | INSIDE |          | 1.712368  | 3.2769826 | 5447 |  |
| 2.0725493 | 4.2062929 | INSIDE | 335.4335 | 2.040116  | 4.112786  | 2390 |  |
| 1.8114073 | 3.509845  | INSIDE | 346.5105 | 1.9965936 | 3.9905666 | 939  |  |
| 1.9738369 | 3.9281143 | INSIDE | 67.85761 |           |           |      |  |
| 2.5075004 | 5.6863401 | INSIDE | 1664.39  | 1.9243368 | 3.7956233 | 82   |  |
| 1.6540482 | 3.1471549 | INSIDE | 422.8368 | 1.954239  | 3.8751147 | 568  |  |
| 2.1587708 | 4.4653424 | INSIDE | 121.3036 |           |           |      |  |
| 1.6637242 | 3.1683335 | INSIDE |          | 1.7022736 | 3.2541339 | 3165 |  |
| 1.9044654 | 3.7437015 | INSIDE | 139.8155 | 1.575458  | 2.9803009 | 1750 |  |
| 2.1659353 | 4.4875727 | INSIDE |          | 1.7736655 | 3.4192158 | 3700 |  |
| 1.7084324 | 3.2680553 | INSIDE | 200.8973 | 2.2055922 | 4.6126384 | 2834 |  |
| 2.356506  | 5.1212855 | INSIDE | 1052.196 |           |           |      |  |
| 1.707038  | 3.2648982 | INSIDE | 775.6517 |           |           |      |  |
| 2.2183883 | 4.6537325 | INSIDE | 168.3905 | 1.8683522 | 3.6511532 | 439  |  |
| 2.0309837 | 4.0868342 | INSIDE |          | 1.1149572 | 2.1658858 | 5530 |  |
| 2.381356  | 5.2102623 | INSIDE |          | 1.6288489 | 3.0926614 | 4721 |  |
| 2.2515175 | 4.7618346 | INSIDE |          | 1.6667556 | 3.1749978 | 4328 |  |
| 2.1163628 | 4.3359941 | INSIDE | 366.8137 | 2.1849778 | 4.5471979 | 1683 |  |

|           |           |        |          |           |           |      |
|-----------|-----------|--------|----------|-----------|-----------|------|
| 2.2045708 | 4.6093739 | INSIDE |          | 1.6798183 | 3.203876  | 3945 |
| 1.7108682 | 3.2735776 | INSIDE | 711.9032 | 2.235975  | 4.7108095 | 2070 |
| 1.9264351 | 3.8011477 | INSIDE | 227.1916 | 1.8122045 | 3.5117849 | 2326 |
| 2.1172743 | 4.3387345 | INSIDE | 191.2038 | 1.433907  | 2.701774  | 3107 |
| 1.8543761 | 3.6159534 | INSIDE | 2668.964 | 2.0971532 | 4.2786427 | 4314 |
| 2.1470442 | 4.429194  | INSIDE | 279.6591 | 2.2362852 | 4.7118225 | 526  |
| 2.0678656 | 4.1926593 | INSIDE | 200.0849 | 1.684347  | 3.2139489 | 2129 |
| 2.308388  | 4.9532931 | INSIDE |          | 1.6435462 | 3.1243286 | 758  |
| 1.7891643 | 3.4561463 | INSIDE | 231.9241 | 1.7189418 | 3.2919486 | 1551 |
| 2.1573157 | 4.4608409 | INSIDE | 679.3914 | 1.8048863 | 3.4940162 | 4421 |
| 1.7337127 | 3.325826  | INSIDE | 275.6118 |           |           |      |
| 2.4693825 | 5.538067  | INSIDE | 164.9426 | 2.0864697 | 4.2470753 | 384  |
| 1.927683  | 3.8044371 | INSIDE | 166.072  | 1.4449886 | 2.7226067 | 1819 |
| 2.3542354 | 5.1132317 | INSIDE | 2028.733 | 1.6737204 | 3.1903626 | 2342 |
| 1.679816  | 3.2038709 | INSIDE |          |           |           |      |
| 2.0340872 | 4.0956351 | INSIDE |          | 2.045281  | 4.1275366 | 3445 |
| 2.1664162 | 4.4890688 | INSIDE | 163.2765 |           |           |      |
| 1.9246376 | 3.7964147 | INSIDE |          |           |           |      |
| 1.9660765 | 3.9070413 | INSIDE |          | 1.3863204 | 2.614111  | 5347 |
| 1.9326092 | 3.8174498 | INSIDE | 201.9208 | 1.5911252 | 3.0128424 | 3244 |
| 2.2817426 | 4.8626495 | INSIDE |          | 1.7025622 | 3.2547849 | 4752 |
| 1.6656449 | 3.1725544 | INSIDE | 1385.024 | 2.3683589 | 5.1635343 | 2542 |
| 1.69251   | 3.2321855 | INSIDE | 809.0033 | 2.33929   | 5.0605353 | 120  |
| 1.812657  | 3.5128866 | INSIDE | 453.6409 | 1.4671732 | 2.7647963 | 3562 |
| 1.6982758 | 3.2451289 | INSIDE |          |           |           |      |
| 2.187769  | 4.556004  | INSIDE |          |           |           |      |
| 2.22915   | 4.6885766 | INSIDE | 392.6722 | 1.8718603 | 3.6600422 | 1204 |
| 1.9957088 | 3.9881199 | INSIDE | 288.8434 | 2.0326176 | 4.0914653 | 861  |
| 2.164912  | 4.4843908 | INSIDE | 651.3077 | 2.073543  | 4.2091911 | 72   |
| 1.9536226 | 3.8734594 | INSIDE | 955.9183 |           |           |      |
| 1.8461127 | 3.5953014 | INSIDE |          | 1.5809559 | 2.9916801 | 4463 |
| 1.7036484 | 3.2572363 | INSIDE | 178.0003 | 1.7464008 | 3.3552047 | 2013 |
| 1.8511502 | 3.6078771 | INSIDE | 267.0605 |           |           |      |
| 1.9960908 | 3.9891761 | INSIDE |          | 2.0169158 | 4.0471766 | 949  |
| 1.942343  | 3.8432931 | INSIDE |          |           |           |      |
| 2.793449  | 6.9328522 | INSIDE |          | 1.2202066 | 2.3298008 | 3487 |
| 1.9873872 | 3.9651823 | INSIDE |          | 1.7237095 | 3.3028455 | 2008 |
| 2.73848   | 6.6736684 | INSIDE |          |           |           |      |
| 1.63339   | 3.1024114 | INSIDE | 163.7636 |           |           |      |
| 1.6859722 | 3.2175715 | INSIDE | 1695.398 | 1.8440455 | 3.5901534 | 829  |
| 1.8308533 | 3.5574742 | INSIDE |          | 1.260705  | 2.396128  | 4572 |
| 2.1822882 | 4.5387285 | INSIDE | 151.131  | 2.03307   | 4.0927485 | 3142 |
| 1.9411501 | 3.8401166 | INSIDE | 228.4487 | 1.5123746 | 2.8527921 | 4196 |
| 1.9603767 | 3.8916358 | INSIDE | 310.9053 | 1.5618377 | 2.9522967 | 1934 |
| 1.7738755 | 3.4197136 | INSIDE |          | 2.055577  | 4.1570987 | 1859 |
| 1.8900276 | 3.7064232 | INSIDE | 184.9458 | 1.8469138 | 3.5972983 | 378  |
| 1.8124138 | 3.5122945 | INSIDE | 294.631  | 1.5707141 | 2.9705171 | 1504 |
| 2.1482239 | 4.4328173 | INSIDE | 106.1298 | 1.7222855 | 3.2995871 | 2242 |
| 1.7454106 | 3.3529027 | INSIDE | 2313.907 | 1.5549806 | 2.9382978 | 1048 |
| 2.389782  | 5.2407816 | INSIDE | 190.1492 | 2.1539016 | 4.4502969 | 4131 |
| 1.6840215 | 3.2132239 | INSIDE |          | 2.2555592 | 4.7751935 | 1314 |
| 1.6870528 | 3.2199824 | INSIDE |          | 1.361209  | 2.5690038 | 2297 |
| 2.2569942 | 4.7799456 | INSIDE | 261.5612 |           |           |      |
| 1.8633063 | 3.6384054 | INSIDE | 228.2327 |           |           |      |
| 1.7927967 | 3.4648591 | INSIDE |          |           |           |      |
| 2.2887373 | 4.8862826 | INSIDE | 266.5108 |           |           |      |
| 2.0846877 | 4.2418326 | INSIDE | 1559.257 | 1.4467801 | 2.7259897 | 3822 |
| 2.3757195 | 5.1899459 | INSIDE | 292.3172 |           |           |      |

|           |           |        |          |           |           |      |
|-----------|-----------|--------|----------|-----------|-----------|------|
| 1.8866415 | 3.6977341 | INSIDE |          |           |           |      |
| 2.0241184 | 4.0674325 | INSIDE | 253.9749 |           |           |      |
| 1.8679383 | 3.6501058 | INSIDE | 619.4103 | 1.4571587 | 2.7456709 | 1663 |
| 1.8122491 | 3.5118935 | INSIDE | 170.6482 |           |           |      |
| 1.7776772 | 3.4287369 | INSIDE |          | 1.57811   | 2.9857844 | 3054 |
| 2.845545  | 7.1877738 | INSIDE | 153.1488 | 2.1104023 | 4.3181169 | 877  |
| 1.9740312 | 3.9286433 | INSIDE | 542.7186 | 1.1241188 | 2.1796837 | 3078 |
| 1.7178203 | 3.2893905 | INSIDE | 196.4385 |           |           |      |
| 2.3553774 | 5.1172808 | INSIDE | 143.046  | 1.385995  | 2.6135214 | 2856 |
| 1.6046501 | 3.0412198 | INSIDE | 356.6617 | 1.8192354 | 3.5289412 | 2121 |
| 1.6424749 | 3.1220094 | INSIDE | 729.6741 | 1.4170631 | 2.6704134 | 2563 |
| 1.9961329 | 3.9892925 | INSIDE | 159.2601 |           |           |      |
| 1.7876712 | 3.4525713 | INSIDE |          |           |           |      |
| 1.797119  | 3.4752554 | INSIDE | 576.9213 | 1.3627299 | 2.5717134 | 4694 |
| 2.0406501 | 4.1143089 | INSIDE |          | 1.7527947 | 3.3701077 | 1814 |
| 1.6017705 | 3.0351556 | INSIDE | 150.7492 |           |           |      |
| 2.4219484 | 5.3589427 | INSIDE | 4165.437 | 1.5645579 | 2.9578685 | 5605 |
| 2.1633823 | 4.4796385 | INSIDE | 5631.445 | 2.414986  | 5.333143  | 111  |
| 1.9800965 | 3.9451947 | INSIDE |          | 1.8118912 | 3.5110224 | 2354 |
| 1.8954861 | 3.7204731 | INSIDE | 136.6052 |           |           |      |
| 1.7023371 | 3.2542771 | INSIDE |          | 1.5163536 | 2.860671  | 4842 |
| 1.6888522 | 3.224001  | INSIDE | 510.03   |           |           |      |
| 2.2913775 | 4.8952329 | INSIDE | 797.6722 | 2.0606918 | 4.1718631 | 1185 |
| 2.038662  | 4.1086431 | INSIDE |          | 1.7957733 | 3.4720153 | 2224 |
| 1.8155214 | 3.5198682 | INSIDE | 102.1563 | 1.5037408 | 2.8357705 | 4826 |
| 1.7118739 | 3.2758604 | INSIDE | 189.311  | 1.6335326 | 3.102718  | 5207 |
| 2.1822011 | 4.5384545 | INSIDE | 423.6372 | 1.3948809 | 2.6296684 | 2967 |
| 1.6362325 | 3.10853   | INSIDE |          | 1.6187419 | 3.0710711 | 2687 |
| 2.0630636 | 4.1787273 | INSIDE | 138.4039 | 1.3897051 | 2.6202511 | 2168 |
| 1.8852545 | 3.6941809 | INSIDE |          | 1.5124546 | 2.8529503 | 2941 |
| 1.9330437 | 3.8185997 | INSIDE | 669.9094 | 1.4052529 | 2.6486421 | 1465 |
| 2.0935519 | 4.2679755 | INSIDE | 2112.614 | 2.2661762 | 4.8104645 | 1236 |
| 1.7676579 | 3.4050073 | INSIDE | 2266.03  | 1.1883863 | 2.2789769 | 4762 |
| 2.1011343 | 4.2904658 | INSIDE |          |           |           |      |
| 1.917415  | 3.7774561 | INSIDE |          | 2.0399625 | 4.1123484 | 405  |
| 1.6774114 | 3.1985353 | INSIDE | 188.0762 |           |           |      |
| 1.8767056 | 3.6723552 | INSIDE | 248.2596 | 1.6093035 | 3.0510451 | 3909 |
| 1.8476843 | 3.59922   | INSIDE | 637.6487 | 1.2492973 | 2.377256  | 4989 |
| 1.9935898 | 3.9822666 | INSIDE | 127.964  |           |           |      |
| 1.9600979 | 3.8908838 | INSIDE | 4225.571 | 2.2074194 | 4.6184841 | 176  |
| 2.313328  | 4.970283  | INSIDE | 1792.069 | 1.679487  | 3.2031403 | 2144 |
| 2.349283  | 5.0957094 | INSIDE | 165.201  |           |           |      |
| 2.3415494 | 5.0684668 | INSIDE |          | 2.326723  | 5.0166455 | 2467 |
| 2.1977408 | 4.5876038 | INSIDE | 309.3725 |           |           |      |
| 1.9010065 | 3.7347366 | INSIDE | 172.1743 | 1.538289  | 2.9044983 | 2397 |
| 1.8337011 | 3.5645034 | INSIDE | 321.3856 |           |           |      |
| 1.7972989 | 3.4756888 | INSIDE | 4972.171 | 2.0190408 | 4.0531422 | 191  |
| 2.3278618 | 5.020607  | INSIDE | 162.1158 | 1.8860881 | 3.696316  | 4161 |
| 1.6422815 | 3.1215909 | INSIDE | 852.8898 | 1.4913499 | 2.8115192 | 2381 |
| 2.03092   | 4.0866537 | INSIDE |          | 2.1278255 | 4.3705823 | 757  |
| 2.259974  | 4.7898285 | INSIDE | 600.225  | 1.5094901 | 2.8470939 | 3666 |
| 1.7815005 | 3.4378355 | INSIDE | 405.3681 | 1.968293  | 3.9130485 | 1305 |
| 1.7632453 | 3.3946087 | INSIDE | 587.377  | 1.973985  | 3.9285175 | 890  |
| 1.9113247 | 3.7615433 | INSIDE | 208.5558 |           |           |      |
| 1.5932297 | 3.0172405 | INSIDE |          | 2.2058032 | 4.6133131 | 1619 |
| 2.1370256 | 4.3985426 | INSIDE | 1230.902 |           |           |      |
| 1.897402  | 3.7254172 | INSIDE | 172.8679 |           |           |      |
| 2.4274313 | 5.3793479 | INSIDE | 159.2262 | 1.8749807 | 3.6679671 | 4676 |

|           |           |        |          |           |           |      |
|-----------|-----------|--------|----------|-----------|-----------|------|
| 1.7992525 | 3.4803985 | INSIDE | 167.4805 | 1.6983563 | 3.24531   | 2331 |
| 1.8055766 | 3.4956884 | INSIDE |          |           |           |      |
| 1.5954653 | 3.0219196 | INSIDE |          |           |           |      |
| 2.0337565 | 4.0946964 | INSIDE | 852.0908 | 1.6296796 | 3.0944427 | 5309 |
| 2.2669637 | 4.813091  | INSIDE | 278.3421 |           |           |      |
| 2.0436025 | 4.1227372 | INSIDE | 369.9521 | 1.3166195 | 2.4908178 | 2940 |
| 1.6919781 | 3.2309941 | INSIDE | 418.321  | 1.4639279 | 2.758584  | 4494 |
| 1.7136272 | 3.279844  | INSIDE | 608.6129 |           |           |      |
| 1.7553573 | 3.3760992 | INSIDE | 244.6276 | 1.4620706 | 2.7550349 | 5417 |
| 1.7038534 | 3.2576992 | INSIDE | 257.8073 | 1.3604999 | 2.5677414 | 1834 |
| 1.8244325 | 3.5416766 | INSIDE |          | 1.4596342 | 2.7503862 | 667  |
| 1.8207905 | 3.5327472 | INSIDE | 249.5352 | 1.7883148 | 3.4541118 | 3554 |
| 1.9021678 | 3.7377441 | INSIDE | 346.7353 |           |           |      |
| 1.7184569 | 3.2908423 | INSIDE |          |           |           |      |
| 1.9498024 | 3.8632162 | INSIDE | 284.4274 | 1.7058678 | 3.262251  | 1823 |
| 2.014223  | 4.0396296 | INSIDE | 843.6936 |           |           |      |
| 2.3584175 | 5.1280755 | INSIDE | 115.7738 | 1.8013494 | 3.4854608 | 3252 |
| 1.9240917 | 3.7949785 | INSIDE | 226.5066 | 2.4170887 | 5.3409216 | 2846 |
| 1.8801855 | 3.6812239 | INSIDE | 1409.64  | 1.8357557 | 3.5695834 | 3033 |
| 2.0292003 | 4.0817853 | INSIDE |          |           |           |      |
| 2.304321  | 4.9393493 | INSIDE | 198.6578 | 1.6902393 | 3.2271023 | 5093 |
| 2.2778325 | 4.8494882 | INSIDE | 197.7122 | 1.5191134 | 2.8661486 | 2871 |
| 1.6587502 | 3.1574288 | INSIDE |          |           |           |      |
| 1.6872035 | 3.2203188 | INSIDE | 180.1545 | 1.7833503 | 3.4422462 | 4675 |
| 1.7405707 | 3.3416733 | INSIDE |          | 1.6810589 | 3.2066322 | 1831 |
| 1.631269  | 3.0978537 | INSIDE | 71.52058 | 1.330622  | 2.5151109 | 5142 |
| 2.081774  | 4.2332744 | INSIDE | 395.7479 | 1.3544403 | 2.556979  | 2903 |
| 1.6255531 | 3.0856044 | INSIDE | 308.0352 | 2.2689216 | 4.8196273 | 302  |
| 1.6885545 | 3.2233358 | INSIDE | 982.0713 | 1.634207  | 3.1041688 | 4607 |
| 2.00215   | 4.0059655 | INSIDE |          |           |           |      |
| 2.373306  | 5.1812708 | INSIDE | 112.8782 | 1.6909479 | 3.2286877 | 5505 |
| 1.9482278 | 3.859002  | INSIDE |          | 1.5837123 | 2.9974014 | 3920 |
| 2.2847    | 4.8726277 | INSIDE | 287.028  | 1.3044193 | 2.4698429 | 3526 |
| 2.1269708 | 4.3679938 | INSIDE | 104.5123 |           |           |      |
| 1.8865192 | 3.6974207 | INSIDE | 134.8414 | 2.1826706 | 4.5399317 | 474  |
| 2.3626566 | 5.1431656 | INSIDE | 514.6668 |           |           |      |
| 2.3318422 | 5.034478  | INSIDE | 418.8628 | 1.843145  | 3.5879132 | 4352 |
| 2.604836  | 6.0832235 | INSIDE | 837.9803 | 1.8798198 | 3.6802909 | 3534 |
| 2.1981769 | 4.5889908 | INSIDE | 169.1221 | 1.1880237 | 2.2784042 | 4928 |
| 2.3332436 | 5.0393707 | INSIDE | 367.8073 | 1.2623407 | 2.3988463 | 1943 |
| 1.9029443 | 3.7397564 | INSIDE | 340.4123 | 1.7308073 | 3.319135  | 3204 |
| 1.8623221 | 3.6359241 | INSIDE | 627.604  | 1.195395  | 2.2900752 | 1296 |
| 1.6343118 | 3.1043943 | INSIDE | 162.8882 | 1.458176  | 2.7476076 | 841  |
| 1.8915973 | 3.7104581 | INSIDE | 176.3427 | 1.4952354 | 2.8191015 | 4920 |
| 1.7563326 | 3.3783823 | INSIDE | 1691.776 | 1.7613245 | 3.3900922 | 2276 |
| 1.7876275 | 3.4524667 | INSIDE | 757.279  | 2.027741  | 4.0776586 | 3451 |
| 2.3448014 | 5.0799046 | INSIDE | 1019.109 | 2.1630063 | 4.4784711 | 694  |
| 2.0295167 | 4.0826806 | INSIDE | 305.8126 | 1.7021579 | 3.2538729 | 2632 |
| 2.0606568 | 4.1717618 | INSIDE | 292.5749 | 1.3118005 | 2.4825117 | 3282 |
| 1.7333744 | 3.3250462 | INSIDE |          | 1.2584606 | 2.3924033 | 3406 |
| 2.2247624 | 4.6743391 | INSIDE |          | 1.6949763 | 3.2377157 | 2969 |
| 1.9518028 | 3.8685765 | INSIDE | 114.0285 |           |           |      |
| 2.4488938 | 5.4599729 | INSIDE | 258.8715 | 1.7701292 | 3.410845  | 2930 |
| 1.6428531 | 3.122828  | INSIDE |          |           |           |      |
| 2.059839  | 4.1693977 | INSIDE |          | 1.7539731 | 3.3728616 | 2495 |
| 1.706622  | 3.2639569 | INSIDE |          | 1.3814893 | 2.6053719 | 1471 |
| 1.7393469 | 3.3388399 | INSIDE | 381.552  | 1.5501357 | 2.9284468 | 2255 |
| 1.734138  | 3.3268066 | INSIDE | 174.9322 | 2.246599  | 4.745628  | 1291 |



|           |           |        |          |           |           |      |
|-----------|-----------|--------|----------|-----------|-----------|------|
| 2.1440418 | 4.419986  | INSIDE | 164.3007 | 1.5068387 | 2.8418663 | 1963 |
| 1.7676593 | 3.4050106 | INSIDE | 175.3708 | 1.1177086 | 2.1700204 | 4781 |
| 1.9861195 | 3.9616996 | INSIDE |          |           |           |      |
| 2.1671154 | 4.4912449 | INSIDE |          | 1.6068424 | 3.0458447 | 2151 |
| 2.0565207 | 4.1598188 | INSIDE |          |           |           |      |
| 1.7990085 | 3.4798099 | INSIDE |          | 1.728719  | 3.314334  | 817  |
| 2.0320387 | 4.0898238 | INSIDE | 845.1851 | 1.4459194 | 2.7243639 | 3303 |
| 2.0237339 | 4.0663486 | INSIDE |          | 2.0257592 | 4.0720611 | 629  |
| 1.7507262 | 3.3652792 | INSIDE |          |           |           |      |
| 1.6896105 | 3.225696  | INSIDE |          | 1.5653623 | 2.9595181 | 2035 |
| 2.2717395 | 4.8290503 | INSIDE | 146.4716 |           |           |      |
| 2.1509888 | 4.4413209 | INSIDE | 154.98   | 1.5507125 | 2.9296179 | 4187 |
| 1.8241044 | 3.5408713 | INSIDE | 236.9384 | 1.9986202 | 3.9961762 | 1768 |
| 2.0232797 | 4.0650686 | INSIDE | 713.6517 | 1.6362501 | 3.1085679 | 4484 |
| 2.2796934 | 4.8557475 | INSIDE | 152.8086 | 1.646869  | 3.1315328 | 2510 |
| 1.6683317 | 3.1784683 | INSIDE | 184.3124 |           |           |      |
| 2.2175057 | 4.6508864 | INSIDE | 167.9781 | 1.6904069 | 3.2274772 | 1179 |
| 2.107518  | 4.3094926 | INSIDE | 431.3885 |           |           |      |
| 2.2772124 | 4.8474042 | INSIDE |          |           |           |      |
| 1.7549468 | 3.3751387 | INSIDE | 296.0605 | 2.3742728 | 5.1847442 | 1800 |
| 1.9858989 | 3.9610939 | INSIDE | 158.458  | 1.8564397 | 3.6211293 | 510  |
| 1.6781871 | 3.2002555 | INSIDE | 1614.637 | 1.4023912 | 2.6433935 | 5389 |
| 2.3745105 | 5.1855985 | INSIDE | 330.754  | 1.4326799 | 2.699477  | 666  |
| 1.7118473 | 3.2758001 | INSIDE | 156.8714 |           |           |      |
| 2.2508461 | 4.759619  | INSIDE | 128.0118 | 1.4441279 | 2.7209829 | 3373 |
| 1.8634492 | 3.6387658 | INSIDE | 1177.542 | 1.3534856 | 2.5552875 | 3669 |
| 1.8598179 | 3.6296185 | INSIDE | 183.1086 | 1.3014133 | 2.4647021 | 4078 |
| 2.319198  | 4.9905472 | INSIDE | 141.0006 |           |           |      |
| 1.8157429 | 3.5204086 | INSIDE | 371.8073 | 1.8409904 | 3.5825588 | 2977 |
| 2.0523105 | 4.147697  | INSIDE | 225.7301 | 2.6906111 | 6.4558681 | 1198 |
| 2.2606936 | 4.7922182 | INSIDE | 222.4426 |           |           |      |
| 1.8164202 | 3.5220617 | INSIDE | 173.1526 | 1.2400876 | 2.3621287 | 3997 |
| 1.997357  | 3.9926788 | INSIDE | 261.3257 | 1.7669228 | 3.4032728 | 2512 |
| 2.141097  | 4.4109732 | INSIDE | 207.0694 |           |           |      |
| 1.9900002 | 3.9723705 | INSIDE |          |           |           |      |
| 1.9066454 | 3.7493627 | INSIDE | 1299.531 | 1.9083761 | 3.7538633 | 244  |
| 2.076283  | 4.2171929 | INSIDE | 4865.875 |           |           |      |
| 2.0320072 | 4.0897345 | INSIDE | 229.243  | 1.3203156 | 2.4972073 | 4226 |
| 2.2973893 | 4.9156742 | INSIDE | 169.0238 | 1.7366471 | 3.3325975 | 1984 |
| 2.2700965 | 4.8235539 | INSIDE |          | 1.2450197 | 2.3702179 | 5274 |
| 2.3476264 | 5.0898615 | INSIDE | 332.5655 | 1.6246846 | 3.0837474 | 1712 |
| 1.8809097 | 3.6830723 | INSIDE | 1089.982 | 1.4432092 | 2.7192508 | 2816 |
| 3.3823774 | 10.427905 | INSIDE |          | 1.8910319 | 3.7090042 | 1731 |
| 1.9251951 | 3.797882  | INSIDE | 1158.548 | 1.9198291 | 3.7837823 | 5463 |
| 2.0118997 | 4.0331294 | INSIDE | 645.5713 | 1.6615713 | 3.163609  | 2676 |
| 2.1034303 | 4.2972994 | INSIDE | 119.935  | 1.6709081 | 3.1841496 | 4406 |
| 2.199325  | 4.5926441 | INSIDE | 342.9402 | 1.8299259 | 3.5551881 | 2041 |
| 2.0421832 | 4.1186833 | INSIDE | 2570.636 | 1.5653346 | 2.9594613 | 4648 |
| 2.1332107 | 4.386927  | INSIDE | 648.5577 | 1.6968194 | 3.2418546 | 1649 |
| 1.8060503 | 3.4968364 | INSIDE | 1596.122 | 1.9518255 | 3.8686374 | 3450 |
| 2.0427573 | 4.1203226 | INSIDE | 186.0098 | 1.5906409 | 3.0118312 | 1670 |
| 1.9754826 | 3.9325977 | INSIDE |          | 1.6284589 | 3.0918255 | 4500 |
| 2.1144965 | 4.3303886 | INSIDE | 243.7691 | 1.8753817 | 3.6689868 | 3281 |
| 2.410906  | 5.3180819 | INSIDE |          | 1.3678275 | 2.5808164 | 4461 |
| 1.7897794 | 3.4576202 | INSIDE | 139.1112 |           |           |      |
| 1.8935223 | 3.7154123 | INSIDE | 703.1829 | 1.6097432 | 3.0519751 | 2319 |
| 1.9654484 | 3.9053407 | INSIDE |          |           |           |      |
| 2.7949371 | 6.9400069 | INSIDE | 369.4848 | 1.8660148 | 3.6452425 | 4241 |

|           |           |        |          |           |           |      |
|-----------|-----------|--------|----------|-----------|-----------|------|
| 1.8121754 | 3.5117141 | INSIDE |          | 2.1081562 | 4.3113993 | 1942 |
| 1.6726427 | 3.1879803 | INSIDE | 3032.249 | 1.8614807 | 3.6338042 | 566  |
| 2.031755  | 4.0890197 | INSIDE | 120.6587 | 1.7404681 | 3.3414357 | 2432 |
| 2.5049937 | 5.6764686 | INSIDE | 138.3255 | 2.0707707 | 4.2011104 | 4019 |
| 2.0246212 | 4.0688503 | INSIDE | 838.9918 | 1.3856806 | 2.612952  | 2247 |
| 1.6758181 | 3.1950048 | INSIDE | 191.136  |           |           |      |
| 1.5955477 | 3.0220923 | INSIDE | 325.3447 | 1.5694448 | 2.9679048 | 2569 |
| 1.743713  | 3.3489597 | INSIDE |          |           |           |      |
| 1.7150797 | 3.2831478 | INSIDE | 139.9077 | 0.9659408 | 1.9533369 | 4787 |
| 2.2664623 | 4.8114185 | INSIDE | 922.9667 |           |           |      |
| 1.7518766 | 3.3679637 | INSIDE |          | 1.8312706 | 3.5585034 | 5290 |
| 1.9827998 | 3.9525941 | INSIDE |          | 1.9222498 | 3.7901365 | 3573 |
| 2.0433428 | 4.1219951 | INSIDE |          |           |           |      |
| 2.2289102 | 4.6877973 | INSIDE |          |           |           |      |
| 2.184693  | 4.5463004 | INSIDE | 1589.273 | 1.8276997 | 3.5497064 | 1478 |
| 1.8435949 | 3.5890323 | INSIDE | 1805.318 | 1.7135661 | 3.2797051 | 1013 |
| 2.1362386 | 4.3961439 | INSIDE | 237.7203 | 1.268076  | 2.4084016 | 3063 |
| 2.158912  | 4.4657794 | INSIDE | 759.3989 | 1.4224918 | 2.6804808 | 1525 |
| 1.8994797 | 3.7307862 | INSIDE | 168.0326 | 1.7412782 | 3.3433125 | 3435 |
| 2.036087  | 4.1013163 | INSIDE |          | 1.8321383 | 3.5606442 | 268  |
| 2.139714  | 4.4067468 | INSIDE | 185.9173 | 1.2321213 | 2.3491214 | 2437 |
| 2.0525877 | 4.148494  | INSIDE | 109.2287 | 1.3817025 | 2.6057569 | 5226 |
| 1.9626654 | 3.8978144 | INSIDE |          | 1.5365124 | 2.9009238 | 2174 |
| 1.7150369 | 3.2830504 | INSIDE | 1421.617 | 1.7813375 | 3.4374471 | 3417 |
| 1.8592036 | 3.6280733 | INSIDE | 168.9544 | 1.4145272 | 2.6657236 | 3814 |
| 1.812428  | 3.512329  | INSIDE | 726.4178 |           |           |      |
| 1.6365    | 3.1091064 | INSIDE | 368.14   |           |           |      |
| 2.0934026 | 4.2675339 | INSIDE | 205.9442 |           |           |      |
| 1.9767603 | 3.9360821 | INSIDE | 247.3646 |           |           |      |
| 1.681399  | 3.2073882 | INSIDE | 472.7499 |           |           |      |
| 1.6549916 | 3.1492136 | INSIDE | 709.7371 | 1.1510974 | 2.2208276 | 5590 |
| 1.8912841 | 3.7096526 | INSIDE | 2968.661 |           |           |      |
| 2.052294  | 4.1476495 | INSIDE | 627.3303 | 2.173859  | 4.5122875 | 1937 |
| 2.1314218 | 4.3814907 | INSIDE | 225.0816 |           |           |      |
| 2.040393  | 4.1135757 | INSIDE | 134.8331 |           |           |      |
| 1.7169942 | 3.2875075 | INSIDE | 342.9594 | 1.6900582 | 3.2266972 | 1742 |
| 1.6576415 | 3.1550033 | INSIDE | 974.9503 | 1.7815874 | 3.4380425 | 1805 |
| 1.8003883 | 3.4831396 | INSIDE | 1775.583 | 1.8938588 | 3.716279  | 427  |
| 2.040098  | 4.1127347 | INSIDE |          |           |           |      |
| 1.9545339 | 3.8759069 | INSIDE | 144.4005 | 1.3933312 | 2.6268452 | 5333 |
| 2.1910262 | 4.5663018 | INSIDE | 313.9377 | 1.7803247 | 3.4350348 | 740  |
| 2.013671  | 4.0380842 | INSIDE | 189.3783 | 2.2832882 | 4.8678618 | 762  |
| 2.0805645 | 4.2297269 | INSIDE | 1317.471 |           |           |      |
| 2.0625372 | 4.1772028 | INSIDE |          | 1.7944237 | 3.4687688 | 3980 |
| 2.211655  | 4.6320634 | INSIDE | 1143.384 | 2.1059155 | 4.3047084 | 5370 |
| 1.9589134 | 3.8876906 | INSIDE |          | 1.3215605 | 2.4993631 | 4697 |
| 2.6121197 | 6.1140133 | INSIDE | 104.1756 |           |           |      |
| 1.9030254 | 3.7399666 | INSIDE |          | 1.2997689 | 2.4618944 | 5537 |
| 1.9618316 | 3.8955623 | INSIDE | 504.1552 |           |           |      |
| 1.7621028 | 3.3919215 | INSIDE | 170.9677 |           |           |      |
| 1.6004632 | 3.0324066 | INSIDE | 156.4675 |           |           |      |
| 1.9678715 | 3.9119054 | INSIDE |          | 1.4882425 | 2.80547   | 3662 |
| 2.4631937 | 5.5143609 | INSIDE | 319.2354 | 2.0487487 | 4.1374696 | 3783 |
| 1.8599494 | 3.6299493 | INSIDE | 1132.855 | 1.8733581 | 3.6638441 | 4834 |
| 1.7777357 | 3.4288759 | INSIDE |          | 1.5098817 | 2.8478669 | 4179 |
| 1.8445235 | 3.5913431 | INSIDE | 2101.196 | 1.673981  | 3.1909389 | 624  |
| 1.6150695 | 3.0632636 | INSIDE | 331.8281 | 1.7981831 | 3.4778196 | 4075 |
| 1.5873784 | 3.0050279 | INSIDE | 531.9653 | 1.3354456 | 2.5235341 | 2093 |

|           |           |        |          |           |           |      |
|-----------|-----------|--------|----------|-----------|-----------|------|
| 1.765574  | 3.4000925 | INSIDE | 2480.891 | 1.5833486 | 2.9966459 | 4720 |
| 2.1207957 | 4.3493376 | INSIDE |          | 2.605778  | 6.0871968 | 4454 |
| 1.9293581 | 3.8088569 | INSIDE | 196.6942 | 1.6307622 | 3.0967656 | 3915 |
| 1.6301554 | 3.0954634 | INSIDE | 171.4199 | 1.3830166 | 2.6081315 | 2768 |
| 2.6136553 | 6.1205245 | INSIDE |          |           |           |      |
| 1.7674282 | 3.4044652 | INSIDE |          | 1.2389714 | 2.3603019 | 3619 |
| 1.9953604 | 3.987157  | INSIDE | 202.0945 | 1.799854  | 3.4818499 | 3329 |
| 2.378895  | 5.201382  | INSIDE | 338.0685 |           |           |      |
| 2.0596669 | 4.1689004 | INSIDE |          | 1.7907718 | 3.4599994 | 3609 |
| 1.7215674 | 3.2979451 | INSIDE | 131.546  | 1.4400992 | 2.7133952 | 3395 |
| 1.9839709 | 3.9558039 | INSIDE |          | 1.7039822 | 3.2579901 | 705  |
| 1.7646512 | 3.3979184 | INSIDE | 135.8783 | 1.8098825 | 3.5061373 | 5050 |
| 2.257652  | 4.7821255 | INSIDE | 161.5498 | 2.1406872 | 4.4097204 | 2459 |
| 1.9838623 | 3.9555061 | INSIDE | 686.4504 |           |           |      |
| 2.1520143 | 4.444479  | INSIDE | 489.989  | 1.6198959 | 3.0735286 | 4052 |
| 1.7754346 | 3.4234112 | INSIDE | 242.3165 | 1.878452  | 3.6768033 | 4215 |
| 2.1993897 | 4.5928501 | INSIDE |          | 1.3711016 | 2.58668   | 1509 |
| 2.213277  | 4.6372741 | INSIDE | 245.944  |           |           |      |
| 2.1642241 | 4.4822531 | INSIDE | 609.6368 | 1.5120096 | 2.8520704 | 1087 |
| 2.3236725 | 5.0060493 | INSIDE | 292.8849 | 1.5905226 | 3.0115842 | 3776 |
| 1.6767737 | 3.1971218 | INSIDE | 990.2904 |           |           |      |
| 2.075395  | 4.2145979 | INSIDE | 214.5767 | 1.7340828 | 3.3266793 | 5140 |
| 2.567179  | 5.9264945 | INSIDE | 772.0458 |           |           |      |
| 1.8657565 | 3.6445899 | INSIDE | 1284.211 |           |           |      |
| 2.233138  | 4.701555  | INSIDE | 153.6461 | 1.5662334 | 2.9613056 | 1364 |
| 1.9765865 | 3.9356079 | INSIDE |          |           |           |      |
| 2.0060437 | 4.0167918 | INSIDE | 128.6525 | 1.761284  | 3.389997  | 2007 |
| 2.0591867 | 4.167513  | INSIDE | 333.994  |           |           |      |
| 1.7852824 | 3.4468593 | INSIDE | 213.1047 | 1.4336612 | 2.7013137 | 972  |
| 1.8732117 | 3.6634723 | INSIDE |          | 1.5354781 | 2.8988448 | 3853 |
| 2.8450084 | 7.1851008 | INSIDE |          |           |           |      |
| 2.3941548 | 5.2566905 | INSIDE |          | 2.3051348 | 4.9421363 | 716  |
| 1.9291527 | 3.8083147 | INSIDE |          | 1.5369364 | 2.9017765 | 3866 |
| 2.0411782 | 4.1158152 | INSIDE |          |           |           |      |
| 2.805047  | 6.9888108 | INSIDE |          | 1.3277565 | 2.5101203 | 3625 |
| 1.6398497 | 3.1163336 | INSIDE | 233.0337 | 1.850789  | 3.6069739 | 2693 |
| 2.002973  | 4.0082514 | INSIDE | 266.5231 | 1.9124384 | 3.7644482 | 2353 |
| 1.6574951 | 3.1546831 | INSIDE | 170.1555 | 1.1276529 | 2.1850297 | 1779 |
| 1.6791213 | 3.2023285 | INSIDE | 759.769  | 1.6530185 | 3.1449095 | 277  |
| 1.946767  | 3.8550966 | INSIDE | 855.8549 | 1.6547749 | 3.1487406 | 2016 |
| 1.7733911 | 3.4185656 | INSIDE | 111.1457 |           |           |      |
| 2.5616417 | 5.9037912 | INSIDE | 189.5943 |           |           |      |
| 1.9577589 | 3.8845807 | INSIDE | 488.7419 | 1.8226858 | 3.5373913 | 3135 |
| 1.9685823 | 3.9138333 | INSIDE | 1102.796 |           |           |      |
| 1.8941191 | 3.7169495 | INSIDE | 209.5724 |           |           |      |
| 1.9180727 | 3.7791786 | INSIDE | 229.7912 | 1.8473876 | 3.5984799 | 5424 |
| 1.6735113 | 3.1899002 | INSIDE | 992.1316 | 1.1742527 | 2.2567595 | 3266 |
| 1.9123194 | 3.7641377 | INSIDE | 887.149  | 2.1452813 | 4.4237851 | 3729 |
| 2.264179  | 4.8038097 | INSIDE | 1068.479 |           |           |      |
| 1.6294079 | 3.09386   | INSIDE | 106.8842 | 1.9476426 | 3.857437  | 2234 |
| 1.6150882 | 3.0633033 | INSIDE |          |           |           |      |
| 1.6913289 | 3.2295405 | INSIDE | 641.2416 |           |           |      |
| 1.8428503 | 3.5871804 | INSIDE |          | 1.0342945 | 2.0481118 | 4545 |
| 2.2167218 | 4.64836   | INSIDE |          | 2.3129601 | 4.9690157 | 1051 |
| 2.2995765 | 4.9231323 | INSIDE | 467.925  | 1.7035271 | 3.2569625 | 1516 |
| 2.0130756 | 4.036418  | INSIDE | 204.7846 | 2.1392286 | 4.4052644 | 593  |
| 1.833796  | 3.5647379 | INSIDE | 187.9487 | 2.2057912 | 4.6132747 | 621  |
| 1.6195434 | 3.0727777 | INSIDE | 424.0465 | 2.0271945 | 4.0761143 | 1332 |

|           |           |        |          |           |           |      |
|-----------|-----------|--------|----------|-----------|-----------|------|
| 1.6638887 | 3.1686948 | INSIDE | 241.3012 |           |           |      |
| 1.8679639 | 3.6501706 | INSIDE |          |           |           |      |
| 1.5884149 | 3.0071877 | INSIDE | 246.2572 |           |           |      |
| 2.2181041 | 4.6528159 | INSIDE | 126.1995 |           |           |      |
| 2.200597  | 4.5966952 | INSIDE | 208.3641 | 1.5730017 | 2.975231  | 4817 |
| 2.7867773 | 6.9008654 | INSIDE | 243.5632 | 1.9222848 | 3.7902284 | 2252 |
| 1.7396811 | 3.3396134 | INSIDE | 161.1965 | 1.5231903 | 2.8742595 | 2011 |
| 1.8799348 | 3.6805843 | INSIDE | 449.3242 | 1.7467598 | 3.3560397 | 2498 |
| 1.63568   | 3.1073398 | INSIDE | 916.6396 | 2.1285222 | 4.3726934 | 4508 |
| 2.2858171 | 4.8764021 | INSIDE | 202.0059 | 1.8855222 | 3.6948664 | 2735 |
| 1.6238486 | 3.081961  | INSIDE | 301.0675 | 1.5650765 | 2.9589319 | 3694 |
| 1.6661125 | 3.1735828 | INSIDE | 2573.853 | 1.701144  | 3.2515869 | 2597 |
| 2.430551  | 5.3909929 | INSIDE | 673.3666 |           |           |      |
| 2.1990643 | 4.5918143 | INSIDE | 3165.276 | 2.0198445 | 4.0554008 | 2246 |
| 1.6894464 | 3.2253292 | INSIDE | 411.6396 | 2.1751978 | 4.5164768 | 126  |
| 1.6325125 | 3.100525  | INSIDE | 307.946  | 1.8082361 | 3.5021384 | 615  |
| 2.3813891 | 5.2103818 | INSIDE | 478.9567 | 2.2927933 | 4.9000392 | 2637 |
| 1.6055369 | 3.0430898 | INSIDE | 213.9621 | 1.5090456 | 2.8462169 | 5083 |
| 2.2584965 | 4.7849256 | INSIDE | 779.8654 | 2.1323078 | 4.3841823 | 1127 |
| 1.6406908 | 3.118151  | INSIDE |          |           |           |      |
| 2.0278816 | 4.078056  | INSIDE | 852.1093 | 1.8337193 | 3.5645484 | 2916 |
| 1.8063291 | 3.4975122 | INSIDE | 288.4742 | 1.3618631 | 2.5701688 | 3630 |
| 2.035308  | 4.0991023 | INSIDE | 565.2824 | 1.454452  | 2.7405244 | 3233 |
| 1.6166407 | 3.0666015 | INSIDE |          |           |           |      |
| 1.6202002 | 3.0741769 | INSIDE | 253.5267 | 1.8602583 | 3.6307266 | 833  |
| 1.9663594 | 3.9078075 | INSIDE | 793.6665 | 0.8425766 | 1.79325   | 5584 |
| 1.7060324 | 3.2626232 | INSIDE | 546.0318 | 1.3892576 | 2.6194385 | 1707 |
| 1.8019475 | 3.4869061 | INSIDE | 112.3344 | 1.7832224 | 3.4419411 | 3916 |
| 1.7183936 | 3.2906979 | INSIDE | 1301.742 | 2.3930178 | 5.2525493 | 45   |
| 1.9818845 | 3.9500872 | INSIDE | 1000.024 | 2.0141034 | 4.0392947 | 237  |
| 2.5963786 | 6.0476666 | INSIDE | 367.5394 | 1.5252943 | 2.8784543 | 2949 |
| 2.319836  | 4.9927546 | INSIDE | 435.2859 | 2.0182137 | 4.0508192 | 781  |
| 2.1898274 | 4.562509  | INSIDE | 389.2078 | 2.0931597 | 4.2668154 | 86   |
| 1.7931962 | 3.4658187 | INSIDE | 517.7772 | 1.1427656 | 2.2080389 | 3725 |
| 1.5851412 | 3.0003716 | INSIDE | 143.9195 |           |           |      |
| 1.8930105 | 3.7140944 | INSIDE |          | 1.7476821 | 3.3581859 | 1328 |
| 1.7495058 | 3.3624337 | INSIDE | 240.5878 | 2.0286367 | 4.080191  | 628  |
| 2.149538  | 4.4368568 | INSIDE |          | 1.7446126 | 3.3510486 | 2836 |
| 2.2088628 | 4.6231071 | INSIDE |          | 1.7551855 | 3.3756972 | 5282 |
| 1.6828651 | 3.2106493 | INSIDE | 2211.014 | 1.7381963 | 3.3361781 | 1491 |
| 2.090779  | 4.2597802 | INSIDE | 347.6294 | 1.7663231 | 3.4018584 | 991  |
| 1.8513738 | 3.6084363 | INSIDE | 551.6924 | 1.9737548 | 3.9278907 | 987  |
| 1.9995528 | 3.9987603 | INSIDE | 1895.959 | 2.177903  | 4.5249536 | 2434 |
| 2.448447  | 5.4582823 | INSIDE |          | 2.2895818 | 4.8891437 | 3009 |
| 1.650112  | 3.13858   | INSIDE | 261.4174 | 1.4917282 | 2.8122565 | 4026 |
| 1.8211292 | 3.5335766 | INSIDE |          |           |           |      |
| 2.1464775 | 4.4274546 | INSIDE | 147.5605 | 1.3774129 | 2.5980207 | 3358 |
| 2.113828  | 4.3283825 | INSIDE | 259.8615 |           |           |      |
| 1.6527046 | 3.1442253 | INSIDE |          |           |           |      |
| 1.7663044 | 3.4018143 | INSIDE | 401.5426 | 2.1540313 | 4.450697  | 205  |
| 2.2949278 | 4.9072943 | INSIDE | 107.8664 | 1.2321758 | 2.3492102 | 4639 |
| 1.698668  | 3.2460113 | INSIDE | 253.1422 | 1.658336  | 3.1565224 | 1589 |
| 1.9477538 | 3.8577343 | INSIDE | 143.352  | 1.8947908 | 3.7186805 | 3815 |
| 1.7174381 | 3.2885192 | INSIDE | 242.8143 |           |           |      |
| 1.7866503 | 3.450129  | INSIDE | 314.0004 | 1.8885581 | 3.7026498 | 2346 |
| 2.0351572 | 4.0986739 | INSIDE | 250.4152 | 1.5275766 | 2.8830115 | 1740 |
| 1.8077983 | 3.5010758 | INSIDE | 851.1107 |           |           |      |
| 2.109471  | 4.3153303 | INSIDE | 85.76307 |           |           |      |

|           |           |        |          |           |           |      |
|-----------|-----------|--------|----------|-----------|-----------|------|
| 1.767125  | 3.4037498 | INSIDE | 156.6972 | 1.4859298 | 2.8009763 | 4191 |
| 1.7651842 | 3.399174  | INSIDE |          | 1.5166038 | 2.8611672 | 2923 |
| 1.7137917 | 3.280218  | INSIDE | 177.5241 | 1.8799034 | 3.6805042 | 644  |
| 1.5912787 | 3.013163  | INSIDE |          | 2.4066792 | 5.3025238 | 1440 |
| 1.7597361 | 3.3863618 | INSIDE |          |           |           |      |
| 1.7561809 | 3.3780271 | INSIDE |          | 1.4658604 | 2.7622816 | 2723 |
| 1.7023677 | 3.2543461 | INSIDE | 182.9539 | 1.8851976 | 3.6940352 | 1163 |
| 1.5924217 | 3.0155511 | INSIDE |          | 1.2646135 | 2.4026283 | 2189 |
| 1.6933572 | 3.2340841 | INSIDE |          | 1.6886672 | 3.2235876 | 3939 |
| 2.1195288 | 4.3455199 | INSIDE | 4213.919 | 2.023966  | 4.0670028 | 754  |
| 1.7269349 | 3.3102379 | INSIDE | 112.3591 | 1.4510628 | 2.7340939 | 610  |
| 1.9760367 | 3.9341084 | INSIDE |          |           |           |      |
| 1.9085903 | 3.7544206 | INSIDE | 216.4131 | 1.4614033 | 2.7537609 | 4322 |
| 1.6442684 | 3.125893  | INSIDE | 173.8222 |           |           |      |
| 1.7898722 | 3.4578426 | INSIDE | 151.1659 |           |           |      |
| 2.118641  | 4.3428466 | INSIDE | 165.7738 | 2.1197097 | 4.3460648 | 1329 |
| 2.2149293 | 4.6425881 | INSIDE | 315.386  | 1.1085368 | 2.1562684 | 4722 |
| 1.9268165 | 3.8021528 | INSIDE |          | 1.9618287 | 3.8955545 | 923  |
| 1.6795473 | 3.2032742 | INSIDE | 328.706  |           |           |      |
| 1.652225  | 3.1431802 | INSIDE | 111.3231 | 1.4880801 | 2.8051542 | 4310 |
| 2.4407856 | 5.429373  | INSIDE | 198.3164 | 1.7663915 | 3.4020197 | 1357 |
| 1.97861   | 3.9411318 | INSIDE | 433.2698 | 2.0225248 | 4.0629421 | 2492 |
| 2.0439453 | 4.1237169 | INSIDE | 224.7394 | 1.7869438 | 3.4508309 | 946  |
| 1.7633231 | 3.3947918 | INSIDE | 216.946  | 1.4951519 | 2.8189383 | 3610 |
| 2.2487147 | 4.7525925 | INSIDE | 163.2439 |           |           |      |
| 1.675143  | 3.1935101 | INSIDE | 179.6261 | 1.4004197 | 2.6397837 | 1701 |
| 2.173305  | 4.5105551 | INSIDE | 131.8579 | 1.7451434 | 3.3522817 | 2854 |
| 2.01449   | 4.0403772 | INSIDE |          |           |           |      |
| 2.3526433 | 5.1075921 | INSIDE | 352.9975 | 1.2793869 | 2.427358  | 5040 |
| 1.5884582 | 3.0072779 | INSIDE | 112.5237 |           |           |      |
| 1.9263146 | 3.8008303 | INSIDE |          | 1.9835758 | 3.9547207 | 3552 |
| 1.7780298 | 3.429575  | INSIDE |          | 1.5635924 | 2.9558896 | 2550 |
| 1.9310977 | 3.8134524 | INSIDE | 91.75427 |           |           |      |
| 2.6458    | 6.2584266 | INSIDE |          | 1.8047463 | 3.4936772 | 5251 |
| 1.673979  | 3.1909345 | INSIDE | 196.8354 |           |           |      |
| 1.6430662 | 3.1232893 | INSIDE | 151.4347 |           |           |      |
| 1.8385668 | 3.5765455 | INSIDE | 632.7335 |           |           |      |
| 2.1564093 | 4.4580392 | INSIDE | 214.0159 | 1.9092195 | 3.7560584 | 4541 |
| 1.6763952 | 3.1962831 | INSIDE |          |           |           |      |
| 2.2257738 | 4.6776172 | INSIDE | 253.3169 | 1.400797  | 2.6404741 | 3066 |
| 1.7559743 | 3.3775434 | INSIDE |          | 1.2012589 | 2.2994023 | 3809 |
| 1.972157  | 3.923543  | INSIDE | 443.1378 | 1.5128869 | 2.8538053 | 3975 |
| 1.5858368 | 3.0018186 | INSIDE |          |           |           |      |
| 1.7320328 | 3.3219556 | INSIDE | 397.5156 | 2.0153577 | 4.042808  | 583  |
| 2.2456956 | 4.7426572 | INSIDE | 249.5599 | 1.840773  | 3.582019  | 5546 |
| 1.7075546 | 3.2660675 | INSIDE | 123.8395 |           |           |      |
| 1.8384066 | 3.5761484 | INSIDE | 152.4416 | 1.5232558 | 2.87439   | 4112 |
| 2.0003443 | 4.0009547 | INSIDE | 318.529  | 1.5543343 | 2.9369817 | 5498 |
| 1.9342265 | 3.8217317 | INSIDE | 967.3002 |           |           |      |
| 1.8327206 | 3.5620817 | INSIDE |          |           |           |      |
| 2.639414  | 6.2307853 | INSIDE | 968.0058 |           |           |      |
| 1.6942215 | 3.2360222 | INSIDE |          | 2.1545532 | 4.4523074 | 1238 |
| 1.7375305 | 3.3346388 | INSIDE |          |           |           |      |
| 2.0843244 | 4.2407646 | INSIDE | 125.8572 |           |           |      |
| 1.8756886 | 3.6697673 | INSIDE | 177.6067 | 1.6987705 | 3.2462419 | 2162 |
| 1.8735993 | 3.6644567 | INSIDE | 141.3877 | 1.8344028 | 3.5662375 | 5418 |
| 1.8041226 | 3.4921671 | INSIDE | 253.2566 |           |           |      |
| 1.8615235 | 3.633912  | INSIDE | 172.5592 | 2.032861  | 4.0921556 | 2640 |

|           |           |        |          |           |           |      |
|-----------|-----------|--------|----------|-----------|-----------|------|
| 1.5851879 | 3.0004687 | INSIDE | 242.0267 | 1.2390451 | 2.3604225 | 1605 |
| 1.6178426 | 3.0691573 | INSIDE | 256.8883 | 1.4159992 | 2.6684449 | 4870 |
| 2.0481448 | 4.135738  | INSIDE | 309.4052 |           |           |      |
| 1.8651985 | 3.6431806 | INSIDE | 564.8278 | 1.4157851 | 2.6680489 | 1771 |
| 1.6619207 | 3.1643753 | INSIDE | 135.204  | 2.0733533 | 4.2086376 | 5156 |
| 2.029127  | 4.0815779 | INSIDE | 117.9447 |           |           |      |
| 2.007808  | 4.0217071 | INSIDE | 3629.243 |           |           |      |
| 2.2044718 | 4.6090576 | INSIDE | 207.3051 | 1.5951095 | 3.0211745 | 3149 |
| 1.9693574 | 3.9159366 | INSIDE | 473.5938 | 1.3586537 | 2.5644576 | 4852 |
| 1.8429657 | 3.5874673 | INSIDE | 489.4102 | 1.6580461 | 3.1558882 | 4188 |
| 1.8575855 | 3.6240064 | INSIDE | 120.1825 |           |           |      |
| 1.8910817 | 3.7091322 | INSIDE |          |           |           |      |
| 2.1544406 | 4.4519599 | INSIDE |          | 1.8294481 | 3.5540109 | 2790 |
| 1.995145  | 3.9865617 | INSIDE | 163.6339 | 1.3854873 | 2.6126019 | 2366 |
| 1.8215848 | 3.5346927 | INSIDE | 317.3569 |           |           |      |
| 2.008492  | 4.0236143 | INSIDE | 143.4695 | 1.7355502 | 3.3300647 | 3357 |
| 1.6418351 | 3.1206252 | INSIDE | 90.56461 |           |           |      |
| 2.292403  | 4.8987138 | INSIDE | 125.7759 | 1.7776831 | 3.4287509 | 5407 |
| 1.6295445 | 3.0941529 | INSIDE |          |           |           |      |
| 1.6753086 | 3.1938767 | INSIDE | 357.4335 | 1.714066  | 3.2808417 | 3134 |
| 1.6050036 | 3.0419651 | INSIDE | 122.6821 |           |           |      |
| 2.3705137 | 5.1712523 | INSIDE |          | 1.914882  | 3.7708297 | 1298 |
| 2.5218482 | 5.7431737 | INSIDE |          | 1.3777578 | 2.5986418 | 5350 |
| 1.8523893 | 3.6109772 | INSIDE | 2158.934 | 1.5345874 | 2.8970557 | 3205 |
| 2.1809235 | 4.5344372 | INSIDE | 113.0869 |           |           |      |
| 1.6682682 | 3.1783284 | INSIDE | 158.6015 | 1.5839593 | 2.9979146 | 2975 |
| 1.8997151 | 3.731395  | INSIDE | 203.9899 | 1.6020012 | 3.035641  | 2927 |
| 2.192625  | 4.571365  | INSIDE |          | 1.3870814 | 2.6154903 | 4942 |
| 2.4480393 | 5.45674   | INSIDE | 623.2902 | 2.2903588 | 4.8917776 | 1287 |
| 1.8399956 | 3.5800894 | INSIDE | 158.2158 |           |           |      |
| 1.7111892 | 3.2743061 | INSIDE | 1435.537 | 1.203387  | 2.3027966 | 4354 |

| Normalized | Normalized | Type   | transcript in | Normalized | Normalized | Rank (P2-12H_R1R2) |
|------------|------------|--------|---------------|------------|------------|--------------------|
| 2.9310338  | 7.626567   | INSIDE |               |            |            |                    |
| 2.3375683  | 5.0544997  | INSIDE | 171.9182      | 1.3497173  | 2.5486218  | 3354               |
| 1.749165   | 3.3616395  | INSIDE | 152.3997      |            |            |                    |
| 1.8157555  | 3.5204394  | INSIDE | 206.4663      |            |            |                    |
| 2.6401548  | 6.2339855  | INSIDE | 130.5695      |            |            |                    |
| 1.8754897  | 3.6692614  | INSIDE |               | 1.3908921  | 2.6224079  | 4294               |
| 2.0027716  | 4.0076919  | INSIDE | 184.0967      | 1.9018412  | 3.736898   | 3292               |
| 1.6481568  | 3.1343294  | INSIDE |               | 1.3094677  | 2.4785008  | 5540               |
| 2.105249   | 4.3027201  | INSIDE | 1799.399      | 1.6507967  | 3.14007    | 4806               |
| 2.1932023  | 4.5731946  | INSIDE |               | 1.9699727  | 3.9176071  | 154                |
| 1.6997774  | 3.2485083  | INSIDE | 760.2377      | 1.702215   | 3.2540017  | 1592               |
| 1.7374573  | 3.3344696  | INSIDE | 119.0331      |            |            |                    |
| 1.9794655  | 3.9434695  | INSIDE | 321.5224      | 1.5668906  | 2.9626549  | 2099               |
| 2.5121782  | 5.7048075  | INSIDE | 418.8445      |            |            |                    |
| 2.1338942  | 4.3890059  | INSIDE |               | 1.4480393  | 2.72837    | 3027               |
| 1.812663   | 3.5129012  | INSIDE | 196.057       | 1.8423522  | 3.5859421  | 1406               |
| 2.0424826  | 4.1195381  | INSIDE |               | 1.425709   | 2.6864649  | 5423               |
| 1.7517648  | 3.3677027  | INSIDE | 577.378       | 1.4865181  | 2.8021188  | 2925               |
| 2.0703459  | 4.1998736  | INSIDE |               |            |            |                    |
| 1.6743402  | 3.1917335  | INSIDE |               | 1.4228265  | 2.6811027  | 3460               |
| 2.3180408  | 4.9865458  | INSIDE |               |            |            |                    |
| 1.7499546  | 3.3634798  | INSIDE |               | 1.1762757  | 2.2599263  | 4522               |
| 2.0953875  | 4.2734093  | INSIDE |               |            |            |                    |

|           |           |        |          |           |           |      |
|-----------|-----------|--------|----------|-----------|-----------|------|
| 2.290517  | 4.892314  | INSIDE |          | 1.590005  | 3.0105039 | 4414 |
| 1.7879627 | 3.453269  | INSIDE |          | 1.2835807 | 2.4344244 | 1709 |
| 2.4891932 | 5.6146387 | INSIDE | 108.3682 |           |           |      |
| 1.5965065 | 3.0241014 | INSIDE |          | 1.5169592 | 2.8618721 | 5268 |
| 2.2289002 | 4.6877648 | INSIDE | 1092.392 | 1.6264771 | 3.0875812 | 1438 |
| 1.8702027 | 3.6558394 | INSIDE |          |           |           |      |
| 1.7640157 | 3.3964219 | INSIDE |          |           |           |      |
| 2.2134461 | 4.6378177 | INSIDE | 136.6261 | 2.1048086 | 4.3014069 | 3206 |
| 2.110159  | 4.3173887 | INSIDE | 2094.711 | 1.6905961 | 3.2279005 | 3913 |
| 2.2751992 | 4.8406447 | INSIDE | 108.9574 | 1.9321408 | 3.8162106 | 4605 |
| 1.8037217 | 3.4911968 | INSIDE |          | 1.6110141 | 3.0546649 | 5512 |
| 2.27399   | 4.8365892 | INSIDE | 221.9033 | 1.4062159 | 2.6504106 | 2556 |
| 2.348489  | 5.0929057 | INSIDE | 3108.829 | 2.265677  | 4.8088002 | 88   |
| 2.3881545 | 5.2348729 | INSIDE |          |           |           |      |
| 1.9289339 | 3.8077372 | INSIDE | 754.6285 | 1.3360919 | 2.5246649 | 3900 |
| 2.1478403 | 4.4316388 | INSIDE | 404.7739 |           |           |      |
| 2.5171196 | 5.7243806 | INSIDE | 170.1528 |           |           |      |
| 1.8947711 | 3.7186297 | INSIDE | 653.2878 | 1.4547514 | 2.7410932 | 4040 |
| 1.9312024 | 3.8137292 | INSIDE | 143.2527 |           |           |      |
| 2.3637912 | 5.147212  | INSIDE | 227.1851 | 2.123694  | 4.358084  | 832  |
| 2.0677354 | 4.1922809 | INSIDE | 618.9843 |           |           |      |
| 2.0372438 | 4.1046062 | INSIDE | 1676.694 | 1.6398643 | 3.1163652 | 4766 |
| 1.7979324 | 3.4772153 | INSIDE |          | 1.7640615 | 3.3965298 | 5503 |
| 1.8787582 | 3.6775838 | INSIDE | 1086.398 |           |           |      |
| 1.8583392 | 3.6259002 | INSIDE | 108.6904 |           |           |      |
| 1.733559  | 3.3254717 | INSIDE | 268.4677 |           |           |      |
| 1.8739625 | 3.6653793 | INSIDE | 855.9595 | 1.7634139 | 3.3950055 | 1349 |
| 2.2604895 | 4.7915403 | INSIDE | 281.5758 | 2.1199226 | 4.3467062 | 4763 |
| 2.1634789 | 4.4799384 | INSIDE |          |           |           |      |
| 1.8424084 | 3.5860818 | INSIDE |          |           |           |      |
| 1.6022843 | 3.0362368 | INSIDE |          |           |           |      |
| 1.9981513 | 3.9948776 | INSIDE | 279.9302 | 1.7696482 | 3.409708  | 3981 |
| 1.7048832 | 3.2600254 | INSIDE | 366.7046 | 1.4662724 | 2.7630706 | 4207 |
| 2.5771048 | 5.9674096 | INSIDE |          | 0.6707386 | 1.5918877 | 4147 |
| 2.0624468 | 4.1769411 | INSIDE | 787.6591 |           |           |      |
| 1.7976979 | 3.4766502 | INSIDE |          |           |           |      |
| 1.8897537 | 3.7057195 | INSIDE | 2702.414 | 1.8991928 | 3.7300444 | 306  |
| 2.6075919 | 6.094855  | INSIDE | 372.7875 |           |           |      |
| 2.9684498 | 7.8269477 | INSIDE | 126.5019 | 1.5026948 | 2.8337153 | 4333 |
| 2.1077838 | 4.3102866 | INSIDE | 245.9021 |           |           |      |
| 1.7498538 | 3.3632448 | INSIDE | 495.0267 |           |           |      |
| 2.2476132 | 4.7489653 | INSIDE | 129.5066 |           |           |      |
| 2.0188262 | 4.0525394 | INSIDE | 108.0238 |           |           |      |
| 1.8987004 | 3.7287715 | INSIDE | 137.6613 |           |           |      |
| 1.7710111 | 3.4129307 | INSIDE | 459.6956 |           |           |      |
| 2.1135292 | 4.3274861 | INSIDE | 748.3826 |           |           |      |
| 2.3244069 | 5.0085983 | INSIDE | 375.0687 |           |           |      |
| 2.3757977 | 5.1902272 | INSIDE | 167.0535 |           |           |      |
| 1.8044417 | 3.4929396 | INSIDE | 404.7242 | 1.5599062 | 2.9483467 | 2838 |
| 2.308157  | 4.9525001 | INSIDE |          | 2.1467311 | 4.4282329 | 3626 |
| 2.364165  | 5.1485458 | INSIDE | 560.8131 |           |           |      |
| 1.8679059 | 3.6500239 | INSIDE | 362.2285 | 1.3041048 | 2.4693046 | 5005 |
| 1.9252951 | 3.7981453 | INSIDE |          | 1.47981   | 2.78912   | 3985 |
| 2.5313952 | 5.7813051 | INSIDE | 163.3366 |           |           |      |
| 1.6549578 | 3.1491398 | INSIDE |          |           |           |      |
| 1.8947482 | 3.7185707 | INSIDE |          | 1.3850436 | 2.6117985 | 4921 |
| 2.004692  | 4.0130302 | INSIDE |          | 1.4118744 | 2.6608264 | 2979 |
| 2.1486082 | 4.4339982 | INSIDE | 1006.204 | 1.7886882 | 3.455006  | 2449 |

|           |           |        |          |           |           |      |
|-----------|-----------|--------|----------|-----------|-----------|------|
| 1.8734081 | 3.663971  | INSIDE | 187.2379 | 2.1289177 | 4.3738923 | 178  |
| 2.8838606 | 7.3812267 | INSIDE | 2177.057 | 2.211605  | 4.6319029 | 809  |
| 1.9183445 | 3.7798907 | INSIDE |          |           |           |      |
| 1.9755479 | 3.9327757 | INSIDE |          | 1.3869328 | 2.6152209 | 5595 |
| 2.0640125 | 4.1814766 | INSIDE | 781.1382 | 1.6443498 | 3.1260694 | 4160 |
| 1.7658389 | 3.4007169 | INSIDE | 135.9946 | 1.5506079 | 2.9294055 | 5543 |
| 1.6174963 | 3.0684207 | INSIDE | 1086.653 |           |           |      |
| 1.8696198 | 3.6543626 | INSIDE | 143.8168 |           |           |      |
| 2.0024729 | 4.0068622 | INSIDE | 441.8593 | 1.9313711 | 3.8141752 | 318  |
| 2.2524707 | 4.7649818 | INSIDE | 431.4943 | 1.6052711 | 3.0425292 | 3586 |
| 1.9945476 | 3.9849113 | INSIDE |          |           |           |      |
| 2.515428  | 5.7176726 | INSIDE |          |           |           |      |
| 1.8711658 | 3.6582808 | INSIDE | 469.4809 |           |           |      |
| 2.1950312 | 4.5789957 | INSIDE | 7104.923 | 1.5859624 | 3.00208   | 668  |
| 1.6749485 | 3.1930796 | INSIDE |          |           |           |      |
| 1.7629577 | 3.3939321 | INSIDE | 5652.629 | 1.7851648 | 3.4465783 | 898  |
| 2.1893282 | 4.5609305 | INSIDE | 578.4572 | 1.7578512 | 3.3819403 | 689  |
| 1.9531626 | 3.8722245 | INSIDE |          |           |           |      |
| 2.3527963 | 5.1081337 | INSIDE | 422.962  | 0.8526411 | 1.8058037 | 4516 |
| 1.9862564 | 3.9620756 | INSIDE | 179.0755 |           |           |      |
| 1.6444196 | 3.1262206 | INSIDE | 231.3358 |           |           |      |
| 2.4234278 | 5.3644408 | INSIDE | 1018.584 |           |           |      |
| 2.7963822 | 6.946962  | INSIDE | 296.7167 |           |           |      |
| 1.6077303 | 3.0477199 | INSIDE |          | 1.4347707 | 2.703392  | 4501 |
| 2.8138952 | 7.0318057 | INSIDE | 189.9925 |           |           |      |
| 1.7761065 | 3.425006  | INSIDE | 3790.191 | 1.8993795 | 3.7305271 | 1971 |
| 2.208445  | 4.6217685 | INSIDE |          |           |           |      |
| 1.987709  | 3.9660669 | INSIDE | 1050.94  | 1.6927325 | 3.232684  | 3046 |
| 2.2180307 | 4.6525792 | INSIDE |          |           |           |      |
| 2.3811898 | 5.2096621 | INSIDE | 186.9959 |           |           |      |
| 1.9088572 | 3.7551153 | INSIDE | 245.8682 |           |           |      |
| 2.4675894 | 5.5311881 | INSIDE | 384.8221 | 1.3857577 | 2.6130916 | 4039 |
| 2.24781   | 4.7496131 | INSIDE | 808.5889 |           |           |      |
| 2.3205433 | 4.995203  | INSIDE | 724.1879 |           |           |      |
| 1.8934247 | 3.7151609 | INSIDE | 287.1358 |           |           |      |
| 2.0402818 | 4.1132587 | INSIDE | 236.8589 |           |           |      |
| 2.5673945 | 5.9273798 | INSIDE | 121.804  | 1.8731037 | 3.663198  | 2487 |
| 2.14988   | 4.4379087 | INSIDE | 165.5943 |           |           |      |
| 2.39659   | 5.2655711 | INSIDE |          | 2.1409047 | 4.4103853 | 1047 |
| 1.767867  | 3.4055009 | INSIDE |          | 1.077718  | 2.1106948 | 5453 |
| 1.779884  | 3.4339856 | INSIDE | 1335.301 |           |           |      |
| 2.259957  | 4.7897721 | INSIDE | 185.9303 | 1.2857813 | 2.4381406 | 3925 |
| 1.934242  | 3.8217728 | INSIDE | 1686.238 |           |           |      |
| 2.3711548 | 5.1735508 | INSIDE | 660.1777 | 1.5513511 | 2.9309149 | 3284 |
| 3.4326088 | 10.797376 | INSIDE |          |           |           |      |
| 1.9633554 | 3.8996791 | INSIDE | 1393.163 | 1.2557105 | 2.3878472 | 330  |
| 1.9717422 | 3.922415  | INSIDE |          |           |           |      |
| 2.256653  | 4.7788153 | INSIDE | 388.8627 |           |           |      |
| 1.7567459 | 3.3793503 | INSIDE | 748.1323 |           |           |      |
| 1.6853158 | 3.2161079 | INSIDE | 3650.99  |           |           |      |
| 1.8025434 | 3.4883466 | INSIDE | 256.4641 | 1.2983222 | 2.4594269 | 5192 |
| 2.14115   | 4.4111353 | INSIDE | 425.774  |           |           |      |
| 1.6959202 | 3.2398347 | INSIDE | 618.7736 | 1.4957001 | 2.8200097 | 3972 |
| 1.8179014 | 3.5256797 | INSIDE |          |           |           |      |
| 2.049914  | 4.1408129 | INSIDE | 4223.56  | 1.6661954 | 3.1737652 | 5189 |
| 1.6284245 | 3.0917518 | INSIDE | 160.3647 |           |           |      |
| 2.2602265 | 4.7906669 | INSIDE | 175.0295 |           |           |      |
| 1.6912299 | 3.2293189 | INSIDE | 86.44846 |           |           |      |



|           |           |        |          |           |           |      |
|-----------|-----------|--------|----------|-----------|-----------|------|
| 2.126753  | 4.3673344 | INSIDE |          |           |           |      |
| 1.6265937 | 3.0878308 | INSIDE |          | 1.4457134 | 2.7239749 | 5555 |
| 1.6699558 | 3.1820484 | INSIDE | 129.9708 |           |           |      |
| 2.1705673 | 4.5020039 | INSIDE | 651.7518 |           |           |      |
| 2.2126517 | 4.6352646 | INSIDE | 153.6463 |           |           |      |
| 1.8954728 | 3.7204388 | INSIDE |          |           |           |      |
| 1.7451357 | 3.3522638 | INSIDE | 487.3846 |           |           |      |
| 2.4655516 | 5.5233808 | INSIDE | 94.33367 |           |           |      |
| 1.9722433 | 3.9237777 | INSIDE | 441.2784 |           |           |      |
| 2.2601964 | 4.7905669 | INSIDE | 111.6738 |           |           |      |
| 1.8440924 | 3.5902701 | INSIDE | 152.6602 |           |           |      |
| 2.2631357 | 4.800337  | INSIDE |          | 2.3908172 | 5.2445435 | 134  |
| 1.7552722 | 3.3759001 | INSIDE | 627.5302 | 1.8384695 | 3.5763043 | 2995 |
| 2.130106  | 4.3774964 | INSIDE | 191.5875 |           |           |      |
| 1.8607091 | 3.6318613 | INSIDE | 369.3485 |           |           |      |
| 2.1666017 | 4.489646  | INSIDE | 1189.669 | 1.8565342 | 3.6213665 | 5183 |
| 1.6981269 | 3.244794  | INSIDE |          | 1.5774674 | 2.9844548 | 1463 |
| 2.0673902 | 4.191278  | INSIDE | 108.5707 | 1.7093614 | 3.2701604 | 3542 |
| 2.127328  | 4.3690754 | INSIDE | 1647.28  |           |           |      |
| 2.3680174 | 5.1623122 | INSIDE | 214.9218 |           |           |      |
| 1.8481244 | 3.6003182 | INSIDE |          |           |           |      |
| 1.8528951 | 3.6122434 | INSIDE |          |           |           |      |
| 1.6478115 | 3.1335793 | INSIDE |          |           |           |      |
| 2.2833803 | 4.8681725 | INSIDE | 98.70368 |           |           |      |
| 1.9802785 | 3.9456924 | INSIDE |          |           |           |      |
| 1.9183755 | 3.7799719 | INSIDE | 92.92792 |           |           |      |
| 2.3917832 | 5.2480563 | INSIDE |          |           |           |      |
| 2.9033382 | 7.4815552 | INSIDE | 426.9154 |           |           |      |
| 2.1559796 | 4.4567116 | INSIDE | 761.3406 | 1.7552001 | 3.3757314 | 4991 |
| 1.924312  | 3.795558  | INSIDE | 189.2317 | 1.5916402 | 3.0139181 | 5006 |
| 2.374797  | 5.1866284 | INSIDE | 161.6212 | 1.3248334 | 2.5050396 | 4317 |
| 2.0687597 | 4.1952585 | INSIDE | 2161.894 | 1.7094089 | 3.2702681 | 1442 |
| 2.171397  | 4.5045937 | INSIDE | 130.0457 |           |           |      |
| 1.682284  | 3.2093564 | INSIDE |          |           |           |      |
| 2.163655  | 4.4804853 | INSIDE | 884.9813 |           |           |      |
| 1.7774669 | 3.4282371 | INSIDE |          | 1.5084139 | 2.8449709 | 3767 |
| 1.7644846 | 3.397526  | INSIDE | 2158.289 | 1.2813734 | 2.4307026 | 5565 |
| 1.9069479 | 3.750149  | INSIDE |          |           |           |      |
| 1.6985198 | 3.2456778 | INSIDE | 403.2735 |           |           |      |
| 1.8767964 | 3.6725863 | INSIDE | 259.8573 | 1.3385949 | 2.5290488 | 2796 |
| 2.343397  | 5.0749619 | INSIDE | 2220.262 | 1.9388776 | 3.8340725 | 524  |
| 1.8118495 | 3.5109209 | INSIDE | 449.3905 |           |           |      |
| 2.4592416 | 5.4992756 | INSIDE | 272.8905 |           |           |      |
| 2.1793077 | 4.5293615 | INSIDE | 319.2978 |           |           |      |
| 1.8156322 | 3.5201385 | INSIDE | 274.5984 |           |           |      |
| 1.7076113 | 3.2661958 | INSIDE | 196.4341 |           |           |      |
| 1.744395  | 3.3505432 | INSIDE |          |           |           |      |
| 2.392962  | 5.2523462 | INSIDE |          |           |           |      |
| 1.7439381 | 3.3494822 | INSIDE | 234.6647 |           |           |      |
| 2.0710845 | 4.2020243 | INSIDE | 369.6575 | 1.5330184 | 2.8939067 | 1288 |
| 2.298965  | 4.921046  | INSIDE | 387.5795 | 1.597973  | 3.0271769 | 1273 |
| 2.1288095 | 4.3735643 | INSIDE | 137.0866 |           |           |      |
| 1.7824982 | 3.4402137 | INSIDE | 149.5168 |           |           |      |
| 1.8607025 | 3.6318447 | INSIDE | 428.6432 |           |           |      |
| 1.9269267 | 3.8024432 | INSIDE | 314.293  |           |           |      |
| 2.1185184 | 4.3424776 | INSIDE | 156.9928 |           |           |      |
| 2.195196  | 4.5795188 | INSIDE | 923.1388 | 1.5269766 | 2.8818128 | 3438 |
| 2.2853441 | 4.8748036 | INSIDE | 645.2163 |           |           |      |

|           |           |        |          |           |           |      |
|-----------|-----------|--------|----------|-----------|-----------|------|
| 2.2844143 | 4.8716629 | INSIDE | 283.4718 | 1.7390448 | 3.3381408 | 5442 |
| 1.9241965 | 3.7952542 | INSIDE | 483.9818 |           |           |      |
| 1.6432694 | 3.1237292 | INSIDE | 167.3643 | 1.2890415 | 2.4436565 | 4981 |
| 2.220853  | 4.6616898 | INSIDE | 354.676  | 0.8747971 | 1.8337502 | 5529 |
| 1.6299475 | 3.0950174 | INSIDE | 606.421  | 1.5659523 | 2.9607287 | 1295 |
| 2.0357096 | 4.1002435 | INSIDE | 237.0471 | 1.5589979 | 2.9464911 | 4505 |
| 1.9394705 | 3.8356485 | INSIDE | 372.0096 | 2.108732  | 4.3131204 | 2227 |
| 2.0851345 | 4.2431465 | INSIDE | 214.6549 |           |           |      |
| 1.7585073 | 3.3834787 | INSIDE | 320.2097 |           |           |      |
| 1.8616412 | 3.6342085 | INSIDE |          |           |           |      |
| 1.9996089 | 3.9989158 | INSIDE | 979.621  | 1.960135  | 3.8909839 | 198  |
| 2.5405748 | 5.8182077 | INSIDE | 1099.077 | 2.0317423 | 4.0889837 | 5538 |
| 2.0657692 | 4.1865713 | INSIDE | 154.8195 |           |           |      |
| 1.6859483 | 3.2175182 | INSIDE | 1526.761 |           |           |      |
| 1.7409383 | 3.3425249 | INSIDE | 133.3398 |           |           |      |
| 2.254667  | 4.7722413 | INSIDE |          |           |           |      |
| 2.5487428 | 5.8512416 | INSIDE |          |           |           |      |
| 2.2324657 | 4.6993646 | INSIDE |          |           |           |      |
| 1.912657  | 3.7650186 | INSIDE | 142.1523 | 1.0540873 | 2.0764042 | 5519 |
| 2.252861  | 4.7662711 | INSIDE |          |           |           |      |
| 2.13328   | 4.3871377 | INSIDE | 292.9118 |           |           |      |
| 1.9643747 | 3.9024353 | INSIDE | 315.3683 | 1.5525638 | 2.9333796 | 4232 |
| 1.9614267 | 3.8944692 | INSIDE | 422.437  | 1.2662534 | 2.4053609 | 5204 |
| 1.7032697 | 3.2563814 | INSIDE | 132.5608 |           |           |      |
| 1.8483672 | 3.6009241 | INSIDE | 186.6718 |           |           |      |
| 2.092726  | 4.2655329 | INSIDE | 361.2087 |           |           |      |
| 1.8336446 | 3.5643638 | INSIDE | 129.5484 |           |           |      |
| 1.7500314 | 3.3636589 | INSIDE | 331.4274 |           |           |      |
| 1.9470512 | 3.8558561 | INSIDE |          | 1.478784  | 2.7871372 | 4929 |
| 1.7863775 | 3.4494767 | INSIDE | 616.3577 |           |           |      |
| 1.795074  | 3.4703327 | INSIDE | 633.4207 | 1.8225847 | 3.5371434 | 2308 |
| 1.9116851 | 3.7624831 | INSIDE | 2252.688 |           |           |      |
| 2.3095584 | 4.9573132 | INSIDE | 199.7923 |           |           |      |
| 1.9375702 | 3.8305995 | INSIDE |          |           |           |      |
| 2.71141   | 6.5496145 | INSIDE | 530.463  |           |           |      |
| 1.6260124 | 3.0865869 | INSIDE |          |           |           |      |
| 1.7665632 | 3.4024246 | INSIDE | 2513.279 |           |           |      |
| 1.7495793 | 3.362605  | INSIDE | 539.2684 |           |           |      |
| 2.3002002 | 4.9252611 | INSIDE | 103.2084 |           |           |      |
| 2.211418  | 4.6313025 | INSIDE | 123.0044 |           |           |      |
| 2.149689  | 4.4373212 | INSIDE | 170.3463 |           |           |      |
| 1.9379922 | 3.8317202 | INSIDE | 2116.923 |           |           |      |
| 2.242931  | 4.7335777 | INSIDE | 218.7114 |           |           |      |
| 1.7128356 | 3.2780449 | INSIDE | 440.1949 |           |           |      |
| 1.6320486 | 3.0995281 | INSIDE | 1814.669 |           |           |      |
| 1.5913537 | 3.0133196 | INSIDE | 151.514  | 1.47595   | 2.7816675 | 3162 |
| 1.7402209 | 3.3408632 | INSIDE |          |           |           |      |
| 1.8350787 | 3.5679087 | INSIDE | 451.6691 | 1.8530607 | 3.612658  | 2266 |
| 1.737201  | 3.3338773 | INSIDE | 203.8382 | 1.4519058 | 2.735692  | 5036 |
| 1.9995353 | 3.9987118 | INSIDE | 484.8441 | 1.8394325 | 3.5786923 | 2150 |
| 2.3950338 | 5.2598943 | INSIDE | 124.6646 | 1.9577105 | 3.8844504 | 248  |
| 1.8371067 | 3.5729276 | INSIDE |          |           |           |      |
| 1.731475  | 3.3206715 | INSIDE | 485.4319 | 1.445536  | 2.72364   | 5551 |
| 2.256198  | 4.7773084 | INSIDE |          |           |           |      |
| 1.8148706 | 3.5182807 | INSIDE | 248.5496 | 1.5899149 | 3.0103159 | 5515 |
| 2.0990446 | 4.2842557 | INSIDE |          |           |           |      |
| 1.6057669 | 3.043575  | INSIDE |          |           |           |      |
| 2.1764815 | 4.5204973 | INSIDE | 356.8723 | 1.4240327 | 2.6833453 | 4008 |

|           |           |        |          |           |           |      |
|-----------|-----------|--------|----------|-----------|-----------|------|
| 1.8120795 | 3.5114807 | INSIDE |          |           |           |      |
| 2.0175226 | 4.0488792 | INSIDE |          | 1.8029144 | 3.4892438 | 2232 |
| 1.6770071 | 3.1976391 | INSIDE | 222.3609 |           |           |      |
| 2.3188522 | 4.9893511 | INSIDE |          | 1.6811811 | 3.2069039 | 243  |
| 2.1743708 | 4.5138886 | INSIDE | 478.9485 | 1.9531893 | 3.8722962 | 3486 |
| 1.7895238 | 3.4570077 | INSIDE | 229.9912 | 1.7821434 | 3.4393678 | 1843 |
| 1.910712  | 3.7599462 | INSIDE | 392.2164 | 1.9607922 | 3.8927568 | 4798 |
| 2.066473  | 4.1886142 | INSIDE | 378.9282 | 1.7266014 | 3.3094728 | 4367 |
| 2.1374176 | 4.399738  | INSIDE | 120.5992 |           |           |      |
| 1.8305392 | 3.5566998 | INSIDE | 97.97869 |           |           |      |
| 2.326603  | 5.0162283 | INSIDE |          | 1.4013666 | 2.6415168 | 4959 |
| 2.1473114 | 4.4300144 | INSIDE |          |           |           |      |
| 1.9736814 | 3.9276909 | INSIDE | 1309.793 | 1.6191101 | 3.071855  | 2328 |
| 1.674002  | 3.1909854 | INSIDE | 489.1437 |           |           |      |
| 1.7057712 | 3.2620326 | INSIDE | 720.3893 |           |           |      |
| 1.9513322 | 3.8673148 | INSIDE |          |           |           |      |
| 2.2062814 | 4.6148425 | INSIDE | 2299.417 |           |           |      |
| 1.9002329 | 3.7327345 | INSIDE | 748.4291 | 1.7458619 | 3.3539517 | 4986 |
| 1.9009058 | 3.7344759 | INSIDE |          | 1.4761939 | 2.7821378 | 5257 |
| 1.9300085 | 3.8105744 | INSIDE |          |           |           |      |
| 1.7716202 | 3.4143719 | INSIDE | 1219.009 |           |           |      |
| 1.7245307 | 3.3047261 | INSIDE | 539.9329 |           |           |      |
| 1.6846577 | 3.2146412 | INSIDE | 394.651  |           |           |      |
| 2.0041857 | 4.0116221 | INSIDE | 93.751   | 1.32144   | 2.4991543 | 4925 |
| 1.8618263 | 3.6346748 | INSIDE |          |           |           |      |
| 1.6526676 | 3.1441447 | INSIDE | 817.2443 |           |           |      |
| 2.2069373 | 4.616941  | INSIDE | 242.3395 |           |           |      |
| 1.8358805 | 3.5698922 | INSIDE |          |           |           |      |
| 1.6295198 | 3.0940999 | INSIDE |          |           |           |      |
| 1.8495252 | 3.6038156 | INSIDE | 864.4376 |           |           |      |
| 1.6262982 | 3.0871984 | INSIDE | 728.8035 |           |           |      |
| 1.9300237 | 3.8106146 | INSIDE |          |           |           |      |
| 1.9299022 | 3.8102937 | INSIDE | 237.0153 |           |           |      |
| 1.8366963 | 3.5719114 | INSIDE | 216.3039 | 1.7896975 | 3.4574239 | 491  |
| 2.3752987 | 5.1884323 | INSIDE |          |           |           |      |
| 1.6648911 | 3.1708972 | INSIDE | 612.0887 |           |           |      |
| 2.4872494 | 5.607079  | INSIDE | 444.1833 |           |           |      |
| 1.9664891 | 3.9081588 | INSIDE | 433.9603 |           |           |      |
| 2.1367261 | 4.3976296 | INSIDE | 323.7952 |           |           |      |
| 1.675661  | 3.1946569 | INSIDE | 370.3005 |           |           |      |
| 2.0361829 | 4.1015889 | INSIDE | 748.0764 |           |           |      |
| 2.1148832 | 4.3315495 | INSIDE | 118.1617 |           |           |      |
| 2.308783  | 4.9546495 | INSIDE | 201.9208 | 1.5255367 | 2.878938  | 4845 |
| 1.7422132 | 3.34548   | INSIDE | 190.8781 | 1.2223353 | 2.333241  | 5504 |
| 2.1189966 | 4.3439172 | INSIDE | 283.7714 |           |           |      |
| 1.9767475 | 3.9360471 | INSIDE |          |           |           |      |
| 1.8132099 | 3.5142331 | INSIDE |          |           |           |      |
| 2.1475117 | 4.4306295 | INSIDE | 261.452  |           |           |      |
| 1.7538003 | 3.3724576 | INSIDE |          |           |           |      |
| 1.9288708 | 3.8075706 | INSIDE | 257.239  |           |           |      |
| 1.7980098 | 3.4774019 | INSIDE | 705.7809 |           |           |      |
| 1.6643802 | 3.1697745 | INSIDE |          | 1.7485433 | 3.3601911 | 3952 |
| 1.9403273 | 3.8379271 | INSIDE | 902.0457 |           |           |      |
| 1.6666101 | 3.1746776 | INSIDE | 184.1755 |           |           |      |
| 1.7900189 | 3.4581942 | INSIDE |          |           |           |      |
| 1.8564594 | 3.6211788 | INSIDE | 114.0949 |           |           |      |
| 2.3016827 | 4.9303248 | INSIDE | 793.3365 |           |           |      |
| 2.0027525 | 4.0076388 | INSIDE | 2538.177 |           |           |      |

|           |           |        |          |           |           |      |
|-----------|-----------|--------|----------|-----------|-----------|------|
| 1.7962089 | 3.4730638 | INSIDE |          | 1.841055  | 3.5827193 | 2598 |
| 1.8485302 | 3.601331  | INSIDE | 174.915  |           |           |      |
| 1.6917696 | 3.2305272 | INSIDE | 112.8427 |           |           |      |
| 1.6625105 | 3.1656692 | INSIDE |          |           |           |      |
| 2.014906  | 4.0415424 | INSIDE | 239.5748 |           |           |      |
| 1.7929235 | 3.4651637 | INSIDE | 143.86   |           |           |      |
| 1.601592  | 3.0347801 | INSIDE |          |           |           |      |
| 2.3645177 | 5.1498046 | INSIDE | 249.9873 |           |           |      |
| 1.6322387 | 3.0999366 | INSIDE | 1868.623 | 1.633061  | 3.101704  | 3828 |
| 1.7552096 | 3.3757536 | INSIDE | 707.3026 |           |           |      |
| 1.9717901 | 3.9225453 | INSIDE | 2876.584 | 1.6857361 | 3.217045  | 713  |
| 2.0029826 | 4.0082781 | INSIDE | 269.9825 | 2.2995756 | 4.9231292 | 2558 |
| 1.9416224 | 3.8413739 | INSIDE |          |           |           |      |
| 1.8173678 | 3.5243759 | INSIDE | 338.041  |           |           |      |
| 1.9035587 | 3.7413494 | INSIDE | 276.8295 | 1.4314296 | 2.6971385 | 5549 |
| 2.1451871 | 4.4234962 | INSIDE | 1975.348 |           |           |      |
| 2.2386334 | 4.719498  | INSIDE | 238.8202 |           |           |      |
| 1.9669626 | 3.9094417 | INSIDE |          |           |           |      |
| 1.8903333 | 3.7072086 | INSIDE | 1203.19  | 2.093428  | 4.267609  | 826  |
| 1.5862532 | 3.0026851 | INSIDE |          | 1.6597542 | 3.1596269 | 2948 |
| 1.9906157 | 3.9740656 | INSIDE | 119.1433 |           |           |      |
| 1.625379  | 3.085232  | INSIDE | 1216.949 |           |           |      |
| 2.0217104 | 4.0606492 | INSIDE |          |           |           |      |
| 1.6171393 | 3.0676615 | INSIDE |          |           |           |      |
| 1.9021109 | 3.7375967 | INSIDE | 1059.267 |           |           |      |
| 2.2287023 | 4.6871218 | INSIDE | 548.147  |           |           |      |
| 2.3318517 | 5.0345112 | INSIDE |          |           |           |      |
| 1.8271326 | 3.5483113 | INSIDE | 791.2463 | 1.6328465 | 3.1012428 | 3441 |
| 2.1088145 | 4.3133671 | INSIDE |          | 1.3908075 | 2.6222541 | 3720 |
| 1.7121546 | 3.2764979 | INSIDE |          |           |           |      |
| 1.7028841 | 3.2555112 | INSIDE | 583.9214 |           |           |      |
| 2.0636709 | 4.1804867 | INSIDE | 278.2999 |           |           |      |
| 1.9278011 | 3.8047485 | INSIDE |          |           |           |      |
| 1.9761285 | 3.9343587 | INSIDE | 1152.023 | 1.7193089 | 3.2927863 | 1612 |
| 1.7632962 | 3.3947285 | INSIDE | 1418.49  | 1.3397777 | 2.5311231 | 3295 |
| 1.821455  | 3.5343747 | INSIDE | 128.5311 |           |           |      |
| 2.2871072 | 4.8807647 | INSIDE |          |           |           |      |
| 1.959822  | 3.8901398 | INSIDE | 147.8275 |           |           |      |
| 2.0211382 | 4.059039  | INSIDE | 607.2008 |           |           |      |
| 1.9880223 | 3.9669282 | INSIDE | 961.7272 |           |           |      |
| 1.6152022 | 3.0635453 | INSIDE | 963.5446 | 1.8073134 | 3.4998993 | 3336 |
| 2.1983168 | 4.5894358 | INSIDE |          |           |           |      |
| 1.9306849 | 3.8123614 | INSIDE |          |           |           |      |
| 1.9740164 | 3.928603  | INSIDE | 145.3382 |           |           |      |
| 1.8044128 | 3.4928696 | INSIDE |          |           |           |      |
| 2.0914044 | 4.2616272 | INSIDE |          |           |           |      |
| 2.0696604 | 4.1978785 | INSIDE | 847.0571 | 1.8022889 | 3.4877313 | 3017 |
| 1.8686187 | 3.6518277 | INSIDE |          | 1.5204794 | 2.8688636 | 1889 |
| 2.361269  | 5.1382212 | INSIDE | 1605.53  |           |           |      |
| 1.886408  | 3.6971357 | INSIDE | 137.0853 |           |           |      |
| 2.0719388 | 4.2045133 | INSIDE | 184.4115 | 1.7537092 | 3.3722446 | 1855 |
| 1.6635607 | 3.1679745 | INSIDE | 499.3073 | 1.887764  | 3.7006123 | 3536 |
| 1.9734666 | 3.9271062 | INSIDE | 1081.026 | 1.4514238 | 2.7347781 | 4353 |
| 2.1129057 | 4.3256163 | INSIDE | 433.5669 | 1.5347122 | 2.8973063 | 3140 |
| 1.8310055 | 3.5578495 | INSIDE | 439.3975 |           |           |      |
| 1.9926473 | 3.9796658 | INSIDE |          |           |           |      |
| 2.3359413 | 5.0488027 | INSIDE |          |           |           |      |
| 1.8017027 | 3.4863145 | INSIDE | 184.0009 |           |           |      |

|           |           |        |          |           |           |      |
|-----------|-----------|--------|----------|-----------|-----------|------|
| 2.1451762 | 4.4234628 | INSIDE | 901.7613 | 1.5450996 | 2.9182421 | 4085 |
| 1.9014269 | 3.7358251 | INSIDE | 1353.5   |           |           |      |
| 2.1493614 | 4.4363137 | INSIDE |          | 1.8667748 | 3.6471633 | 4470 |
| 1.9954809 | 3.98749   | INSIDE |          | 1.5019312 | 2.8322158 | 5287 |
| 2.1521912 | 4.445024  | INSIDE |          |           |           |      |
| 2.6154683 | 6.1282209 | INSIDE | 442.4561 |           |           |      |
| 2.0605931 | 4.1715776 | INSIDE | 171.5117 |           |           |      |
| 1.7659514 | 3.4009821 | INSIDE |          |           |           |      |
| 2.3245587 | 5.0091253 | INSIDE | 296.9906 |           |           |      |
| 1.8170966 | 3.5237134 | INSIDE |          | 2.6237059 | 6.1633123 | 35   |
| 1.8787805 | 3.6776406 | INSIDE | 322.1885 |           |           |      |
| 1.9066497 | 3.7493739 | INSIDE | 500.5962 |           |           |      |
| 1.7448683 | 3.3516426 | INSIDE |          |           |           |      |
| 2.5045352 | 5.6746649 | INSIDE |          |           |           |      |
| 1.6316    | 3.0985645 | INSIDE |          |           |           |      |
| 1.8857164 | 3.6953638 | INSIDE | 1220.44  |           |           |      |
| 2.3987622 | 5.2735052 | INSIDE | 755.1    | 1.9340727 | 3.8213243 | 1435 |
| 2.391941  | 5.2486304 | INSIDE | 173.5159 |           |           |      |
| 1.758487  | 3.3834311 | INSIDE | 202.3238 |           |           |      |
| 2.256063  | 4.7768613 | INSIDE | 723.1403 | 1.0732509 | 2.1041695 | 2270 |
| 1.9120557 | 3.7634497 | INSIDE | 663.5988 |           |           |      |
| 1.6069795 | 3.0461342 | INSIDE | 246.3641 |           |           |      |
| 2.1645668 | 4.4833179 | INSIDE | 951.0166 | 1.5818833 | 2.9936038 | 5598 |
| 1.8866147 | 3.6976654 | INSIDE | 1289.691 | 1.6096234 | 3.0517217 | 5232 |
| 2.4967782 | 5.6442356 | INSIDE | 134.6757 |           |           |      |
| 1.9884926 | 3.9682216 | INSIDE | 7157.248 | 1.0409739 | 2.0576162 | 4663 |
| 1.9393271 | 3.8352672 | INSIDE |          |           |           |      |
| 1.8681769 | 3.6507096 | INSIDE | 305.619  | 1.7427158 | 3.3466456 | 490  |
| 1.7780586 | 3.4296435 | INSIDE |          |           |           |      |
| 2.4772816 | 5.5684724 | INSIDE | 275.2295 |           |           |      |
| 1.8238986 | 3.5403662 | INSIDE | 167.1553 |           |           |      |
| 2.309916  | 4.9585421 | INSIDE | 144.6206 | 1.9916468 | 3.9769069 | 662  |
| 2.0856407 | 4.2446356 | INSIDE | 1905.573 |           |           |      |
| 1.7362871 | 3.331766  | INSIDE | 126.0653 |           |           |      |
| 1.8403156 | 3.5808835 | INSIDE |          |           |           |      |
| 2.0917952 | 4.2627818 | INSIDE | 889.0388 |           |           |      |
| 1.9823964 | 3.951489  | INSIDE |          |           |           |      |
| 1.6521928 | 3.1431101 | INSIDE |          |           |           |      |
| 1.629344  | 3.0937229 | INSIDE | 244.1153 |           |           |      |
| 1.9144998 | 3.7698309 | INSIDE | 160.4111 |           |           |      |
| 2.0866504 | 4.2476073 | INSIDE | 106.0111 |           |           |      |
| 1.6286227 | 3.0921766 | INSIDE | 2664.736 | 1.6170274 | 3.0674236 | 4119 |
| 1.6920033 | 3.2310505 | INSIDE | 583.3428 | 1.6681275 | 3.1780184 | 3024 |
| 1.8885074 | 3.7025197 | INSIDE | 151.8991 |           |           |      |
| 1.6803036 | 3.2049539 | INSIDE | 1130.233 | 1.8144373 | 3.5172242 | 2791 |
| 2.0642848 | 4.1822659 | INSIDE | 119.1746 |           |           |      |
| 2.129898  | 4.3768653 | INSIDE | 885.5021 | 1.4787322 | 2.7870371 | 4323 |
| 2.4408712 | 5.4296951 | INSIDE | 478.7329 |           |           |      |
| 2.2487853 | 4.7528251 | INSIDE | 268.7619 |           |           |      |
| 2.1957774 | 4.5813647 | INSIDE |          |           |           |      |
| 1.5910438 | 3.0126724 | INSIDE | 279.8329 | 1.49131   | 2.8114414 | 3298 |
| 1.7930722 | 3.4655209 | INSIDE | 832.4058 |           |           |      |
| 1.993505  | 3.9820325 | INSIDE | 196.6059 |           |           |      |
| 1.7102472 | 3.2721689 | INSIDE | 299.3685 |           |           |      |
| 2.3287103 | 5.0235607 | INSIDE | 96.56364 |           |           |      |
| 1.7947465 | 3.4695451 | INSIDE | 204.7102 | 1.6465976 | 3.1309438 | 4631 |
| 1.7813493 | 3.4374752 | INSIDE | 567.2739 | 1.4701127 | 2.7704353 | 4604 |
| 1.6359404 | 3.1079007 | INSIDE |          |           |           |      |

|           |           |        |          |           |           |      |
|-----------|-----------|--------|----------|-----------|-----------|------|
| 1.8512198 | 3.6080512 | INSIDE | 2239.335 | 1.3501501 | 2.5493865 | 3289 |
| 1.7328318 | 3.3237959 | INSIDE | 666.5382 |           |           |      |
| 1.6839596 | 3.213086  | INSIDE | 664.7275 | 1.3052629 | 2.4712876 | 1470 |
| 1.7377284 | 3.3350963 | INSIDE |          |           |           |      |
| 2.0403628 | 4.1134896 | INSIDE | 344.6441 |           |           |      |
| 1.6608067 | 3.1619328 | INSIDE |          |           |           |      |
| 2.1335201 | 4.3878679 | INSIDE | 494.2351 | 1.6587309 | 3.1573866 | 3362 |
| 1.8281024 | 3.5506974 | INSIDE | 2701.885 |           |           |      |
| 1.7615703 | 3.3906698 | INSIDE | 2850.66  | 1.7505766 | 3.3649302 | 4864 |
| 1.8848692 | 3.6931944 | INSIDE | 758.2372 |           |           |      |
| 1.6418848 | 3.1207327 | INSIDE |          |           |           |      |
| 1.8498595 | 3.6046508 | INSIDE | 330.1159 | 2.1979825 | 4.5883724 | 2666 |
| 1.8708104 | 3.6573797 | INSIDE | 713.8957 |           |           |      |
| 1.6797162 | 3.2036492 | INSIDE | 992.5947 | 1.5639892 | 2.9567027 | 4836 |
| 1.7336683 | 3.3257237 | INSIDE | 1777.727 | 1.9336897 | 3.82031   | 31   |
| 2.1214955 | 4.3514478 | INSIDE | 210.6017 |           |           |      |
| 1.7813495 | 3.4374757 | INSIDE | 119.5249 |           |           |      |
| 2.046232  | 4.1302583 | INSIDE | 180.7152 |           |           |      |
| 2.1805658 | 4.5333131 | INSIDE |          |           |           |      |
| 2.3190672 | 4.9900947 | INSIDE | 1969.067 |           |           |      |
| 1.8052461 | 3.4948877 | INSIDE |          |           |           |      |
| 2.0068524 | 4.0190441 | INSIDE | 618.7236 |           |           |      |
| 1.9361315 | 3.8267814 | INSIDE | 285.1714 |           |           |      |
| 1.7033043 | 3.2564595 | INSIDE |          |           |           |      |
| 1.6734501 | 3.1897649 | INSIDE | 642.3544 |           |           |      |
| 1.7223502 | 3.2997351 | INSIDE |          |           |           |      |
| 1.6105444 | 3.0536705 | INSIDE | 1238.294 | 1.5963339 | 3.0237396 | 3796 |
| 2.0196083 | 4.0547369 | INSIDE |          |           |           |      |
| 2.0222821 | 4.0622586 | INSIDE |          |           |           |      |
| 1.8373528 | 3.5735372 | INSIDE | 129.2906 |           |           |      |
| 1.8598301 | 3.6296491 | INSIDE | 516.1451 |           |           |      |
| 1.9848771 | 3.9582894 | INSIDE |          | 2.3625813 | 5.1428971 | 3681 |
| 1.8790153 | 3.6782392 | INSIDE | 1567.694 |           |           |      |
| 2.595263  | 6.0429919 | INSIDE | 978.4115 |           |           |      |
| 2.1750705 | 4.5160783 | INSIDE |          |           |           |      |
| 1.8054512 | 3.4953846 | INSIDE | 320.435  | 1.4132806 | 2.6634212 | 2609 |
| 1.6823356 | 3.2094712 | INSIDE | 134.1224 |           |           |      |
| 1.6456392 | 3.1288645 | INSIDE | 603.9487 |           |           |      |
| 2.1487293 | 4.4343705 | INSIDE | 444.1326 | 1.8137044 | 3.5154379 | 4051 |
| 1.6554573 | 3.1502303 | INSIDE |          |           |           |      |
| 1.8646715 | 3.64185   | INSIDE | 123.4206 | 2.150781  | 4.4406812 | 3167 |
| 1.7963094 | 3.4733057 | INSIDE | 203.7868 |           |           |      |
| 2.3920546 | 5.2490437 | INSIDE |          |           |           |      |
| 1.748526  | 3.3601508 | INSIDE |          |           |           |      |
| 1.7643096 | 3.3971139 | INSIDE |          |           |           |      |
| 1.666438  | 3.1742989 | INSIDE |          | 1.4116242 | 2.660365  | 4778 |
| 1.8364266 | 3.5712437 | INSIDE | 769.1606 | 2.1244152 | 4.3602631 | 1865 |
| 1.805244  | 3.4948826 | INSIDE |          |           |           |      |
| 1.686358  | 3.218432  | INSIDE |          |           |           |      |
| 2.254783  | 4.7726251 | INSIDE | 616.4229 |           |           |      |
| 2.085773  | 4.2450249 | INSIDE |          | 1.496659  | 2.8218846 | 5160 |
| 1.7889811 | 3.4557075 | INSIDE |          |           |           |      |
| 1.6082647 | 3.048849  | INSIDE | 405.7786 |           |           |      |
| 1.9465507 | 3.8545186 | INSIDE | 1716.985 |           |           |      |
| 1.9473292 | 3.8565991 | INSIDE | 207.8062 |           |           |      |
| 1.5930073 | 3.0167754 | INSIDE | 188.142  |           |           |      |
| 1.7871115 | 3.4512321 | INSIDE |          |           |           |      |
| 1.9710789 | 3.9206121 | INSIDE | 218.6794 |           |           |      |

|           |           |        |          |           |           |  |      |
|-----------|-----------|--------|----------|-----------|-----------|--|------|
| 2.0464318 | 4.1308303 | INSIDE | 702.2264 |           |           |  |      |
| 1.6605886 | 3.1614548 | INSIDE | 485.2738 |           |           |  |      |
| 2.1476328 | 4.4310015 | INSIDE | 483.0363 |           |           |  |      |
| 2.048102  | 4.1356153 | INSIDE | 323.3313 |           |           |  |      |
| 1.7252791 | 3.3064409 | INSIDE | 1504.191 | 1.457012  | 2.7453917 |  | 2802 |
| 1.9622431 | 3.8966736 | INSIDE | 227.8988 |           |           |  |      |
| 2.4378853 | 5.4184691 | INSIDE |          |           |           |  |      |
| 2.140569  | 4.4093592 | INSIDE |          |           |           |  |      |
| 1.8512626 | 3.6081582 | INSIDE | 277.1771 |           |           |  |      |
| 1.5927278 | 3.016191  | INSIDE |          |           |           |  |      |
| 1.8356199 | 3.5692474 | INSIDE | 1394.841 | 1.2679485 | 2.4081888 |  | 3652 |
| 1.8416759 | 3.5842615 | INSIDE |          |           |           |  |      |
| 2.0176215 | 4.0491568 | INSIDE |          |           |           |  |      |
| 1.76804   | 3.4059093 | INSIDE | 221.6991 |           |           |  |      |
| 2.4556558 | 5.4856242 | INSIDE | 1582.902 |           |           |  |      |
| 1.7212644 | 3.2972526 | INSIDE | 670.5336 |           |           |  |      |
| 2.0857053 | 4.2448257 | INSIDE | 340.7525 |           |           |  |      |
| 1.900233  | 3.7327348 | INSIDE | 986.3594 |           |           |  |      |
| 1.7092816 | 3.2699795 | INSIDE |          |           |           |  |      |
| 2.1694782 | 4.4986066 | INSIDE | 836.2505 |           |           |  |      |
| 2.092741  | 4.2655773 | INSIDE |          |           |           |  |      |
| 2.1012459 | 4.2907977 | INSIDE | 599.5624 |           |           |  |      |
| 2.0364273 | 4.1022838 | INSIDE | 158.5802 |           |           |  |      |
| 1.8209642 | 3.5331725 | INSIDE | 331.7354 |           |           |  |      |
| 2.1947389 | 4.578068  | INSIDE | 208.9432 |           |           |  |      |
| 1.5883965 | 3.0071493 | INSIDE | 1876.03  | 1.701239  | 3.2518011 |  | 750  |
| 2.200856  | 4.5975205 | INSIDE |          |           |           |  |      |
| 1.8317934 | 3.5597931 | INSIDE | 676.8699 |           |           |  |      |
| 2.2783322 | 4.8511682 | INSIDE | 117.7761 |           |           |  |      |
| 1.6502775 | 3.1389401 | INSIDE |          |           |           |  |      |
| 2.3949227 | 5.2594892 | INSIDE | 2725.28  | 2.0066547 | 4.0184934 |  | 1430 |
| 1.7062356 | 3.2630828 | INSIDE |          |           |           |  |      |
| 1.7782995 | 3.4302162 | INSIDE | 117.5464 |           |           |  |      |
| 2.0017908 | 4.0049682 | INSIDE | 286.3933 |           |           |  |      |
| 1.6061516 | 3.0443867 | INSIDE | 351.2539 | 1.4554579 | 2.7424359 |  | 5474 |
| 1.5995979 | 3.0305883 | INSIDE |          |           |           |  |      |

Normalized Normalized Type transcript in Normalized Normalized Rank (P2-NS\_R1R2)  
2.0757613 4.2156681 DOWNSTREAM 1.7117833 3.2756547 6085

ies)

Normalized Normalized Type transcript in Normalized Normalized Rank (P2-12H\_R1R2)  
2.0738177 4.2099926 DOWNSTREAM 2.2753289 4.8410799 1191  
2.2258708 4.6779317 DOWNSTREAM 1.5853715 3.0008506 1168  
1.7924774 3.4640924 DOWNSTR 508.4818 1.9654481 3.9053399 132  
2.565253 5.9185879 DOWNSTR 508.8375  
1.8622442 3.6357278 DOWNSTR 514.3434 1.5792174 2.9880772 4693  
1.644358 3.1260872 DOWNSTR 147.0285 1.3796334 2.6020224 1449  
2.1525466 4.4461191 DOWNSTREAM 2.0229495 4.0641383 4464  
2.2260847 4.6786253 DOWNSTR 125.8169 1.7683418 3.4066218 2482  
1.8310543 3.5579699 DOWNSTREAM 1.4348227 2.7034894 1844  
2.1091282 4.3143051 DOWNSTREAM 1.4637299 2.7582054 3754  
2.1501913 4.4388664 DOWNSTREAM 2.133825 4.3887954 1827  
1.6842356 3.2137008 DOWNSTREAM  
2.135418 4.3936441 DOWNSTR 1703.493  
2.224545 4.6736348 DOWNSTR 784.2172 1.7608818 3.3890521 2207

|           |           |            |          |           |           |      |
|-----------|-----------|------------|----------|-----------|-----------|------|
| 2.581408  | 5.9852354 | DOWNSTR    | 420.8032 | 1.5387809 | 2.9054888 | 2303 |
| 2.0382407 | 4.1074434 | DOWNSTR    | 193.0846 | 1.42854   | 2.6917417 | 4848 |
| 2.0521948 | 4.1473644 | DOWNSTREAM |          |           |           |      |
| 1.7463859 | 3.3551701 | DOWNSTR    | 267.0241 |           |           |      |
| 2.134475  | 4.3907732 | DOWNSTR    | 202.4375 |           |           |      |
| 2.0379357 | 4.1065752 | DOWNSTR    | 126.1446 | 1.7327573 | 3.3236243 | 2067 |
| 1.7842245 | 3.4443327 | DOWNSTR    | 397.6841 | 1.8971022 | 3.7246431 | 3114 |
| 1.7222989 | 3.2996177 | DOWNSTREAM |          | 1.6372786 | 3.1107848 | 1040 |
| 2.119856  | 4.3465056 | DOWNSTREAM |          | 1.6152037 | 3.0635485 | 5492 |
| 1.9976065 | 3.9933693 | DOWNSTR    | 392.0417 |           |           |      |
| 1.8197602 | 3.5302252 | DOWNSTREAM |          | 2.331033  | 5.031655  | 506  |
| 1.823287  | 3.5388657 | DOWNSTREAM |          | 1.3276303 | 2.5099007 | 5507 |
| 1.7779994 | 3.4295027 | DOWNSTR    | 167.4778 | 1.4697078 | 2.7696579 | 2594 |

| Normalized | Normalized | Type       | transcript in | Normalized | Normalized | Rank (P2-12H_R1R2) |
|------------|------------|------------|---------------|------------|------------|--------------------|
| 1.7478619  | 3.3586045  | DOWNSTR    | 262.8616      |            |            |                    |
| 1.6702821  | 3.1827682  | DOWNSTREAM |               | 1.3551747  | 2.5582809  | 2910               |
| 1.8330472  | 3.5628882  | DOWNSTR    | 105.2789      |            |            |                    |
| 2.1466932  | 4.4281166  | DOWNSTR    | 189.5659      |            |            |                    |
| 2.0536253  | 4.1514787  | DOWNSTR    | 225.9483      | 1.9397107  | 3.8362871  | 3761               |
| 1.9827145  | 3.9523604  | DOWNSTR    | 180.674       | 1.1738749  | 2.2561686  | 5564               |
